# Supplementary material
Source: publisher figshare collection journal article supplement (https://gsajournals.figshare.com/articles/dataset/_/14187080)
Supplement: Supplementary file 1 [file 1]

## Sheet: Table S1.
Supplementary Table 1. Strains used in this study
All strains are in the W303 background:
CAN1, ade2-1, his3-11,15, leu2-3, 112, trp1-1, ura3-1, RAD5+ or adc2-11 tris3-11,15 leu 2-3 112 trp1-1 URA 3 RAD5+
JSY#	Other name	Relevant Genotype	Expected dNTP levels	Source
JSY13	EAY1995/4C	RNR1, MATa, CAN1, ade2-1, his3-11,15, leu2-3, 112, trp1-1, ura3-1, RAD5+	Wildtype	Chabes et al., 2003
				Xu et al., 2008
JSY2424	AC402	RNR1-ade2-11 tris3-11,15 leu 2-3 112 trp1-1 URA 3 RAD5+	Wildtype	Chabes et al., 2003
JSY14	EAY1995/8C	rnr1D57N	2-fold balanced elevation in dNTPs	Chabes et al., 2003
JSY2420, JSY2421	DK3A, DK3C	rnr1Y285F-URA3-pGal-RNR1	3-fold increase in dCTP and dTTP	Kumar et al., 2010
JSY2422, JSY2423	DK8A, DK8E	rnr1Y285A-URA3-pGal-RNR1	20-fold increase in dCTP and dTTP	Kumar et al., 2010
JSY3811,JSY3865,JSY3866	JSY3811,JSY3865,JSY3866	rnr1Y285F	3-fold increase in dCTP and dTTP (predicted based on Kumar et al, 2010)	This Study
JSY3868, 3869	JSY3868, 3869	rnr1Y285A	20-fold increase in dCTP and dTTP (predicted based on Kumar et al, 2010)	This Study

## Sheet: Table S2.
Supplementary Table 2. Oligonucleotides used in this study
SO#	Name	Sequence- 5'-3'	Description
261	PRS414 FWD + 0_AatII	GAACTAGACGTCGTTTCGGTGATGACGGTGAA	To generate pEM3 integration plasmid
262	PRS414 REV+4200+AatII	TCCATAGACGTCGGCACTTTTCGGGGAAATGT	To generate pEM3
263	RNR1_-1kb_XhoI_fwd	CTAAGACTCGAGGTGTATAGTAGATCTGCAGCT	To amplify RNR1/rnr1 alleles for ligation into pEM3
264	RNR1_2KB_SpeI_rev	CATCTTACTAGTACGTTTGGTAAGCCTTGAATG	To amplify RNR1/rnr1 alleles for ligation into pEM3
265	RNR1_3kb_SpeI_REV	CATCTTACTAGTTATCATGGCCTTCTTACAAGG	To amplify RNR1/rnr1 alleles for ligation into pEM3
266	PRS416_1.9KB_FWD	CGTAATACGACTCACTATAGG	To amplify RNR1/rnr1 alleles for ligation into pEM3
230	RNR1_rev_3	AAGTTGCGTTCCTTTATAGAACAATG	sequencing primer in RNR1
32	RNR1_16	GGCGTTACCATAGAAATGTACTG	Upstream RNR1 seq primer @ NT -683
21	RNR1rev12	GGAAGTCTTACCATCCTCAGAAG	RNR1 reverse primer at Nt. 1389 (opposite RNR1_4)
25	RNR1_3	CTCTCCAACATCAGCTCCTGG	RNR1 seq primer @ NT 1053
22	RNR1rev13	GAATCTGTATCATGGCCTTCTTAC	RNR1 reverse primer - 233 NT. downstream of STOP
679	RNR1 seq primer 1 NAL	CATCCACGGTAGAGATATCGA	RNR1 seq primer @ NT 531
680	RNR1 seq primer 2 NAL	CGAGAAAGAAGGTCGTGGTAA	RNR1 seq primer @ NT 1122
681	RNR1 seq primer 3 NAL	GACCAAAAACCCTACGGCATG	RNR1 seq primer @ NT 1726
744	rnr1D57N_Q5_F	AATCGAACTAAACAACTTAGC	rnr1D57N Q5 forward
745	rnr1D57N_Q5_R	GTTGTGACACCTTCATAG	rnr1D57N Q5 reverse
746	rnr1Y285A_Q5_F	CACTGCCCGTGCTGTTGACCAG	rnr1Y285A Q5 forward
747	rnr1Y285A_Q5_R	TTATTGAAAACACGAATCATAGG	rnr1Y285A Q5 reverse
748	rnr1Y285F_Q5_F	ACTGCCCGTTTTGTTGACCAG	rnr1Y285F Q5 forward
749	rnr1Y285F_Q5_R	GTTATTGAAAACACGAATCATAGG	rnr1Y285F Q5 reverse
807	CAN1 reg1 Forward_anchored	TCGTCGGCAGCGTCAGATGTGTATAAGAGACAGCTCCTGTAAAAACAAAAAAAAAAAAAGCG	Sequencing primers with nextera adapters: CAN1-region1
714	CAN1 reg1 Reverse	GTCTCGTGGGCTCGGAGATGTGTATAAGAGACAGTAGTACCACCAAGGGCAATC	Sequencing primers with nextera adapters: CAN1-region1
715	CAN1 reg2 Forward	TCGTCGGCAGCGTCAGATGTGTATAAGAGACAGAAGCAAAGACATATTGGTAT	Sequencing primers with nextera adapters: CAN1-region2
716	CAN1 reg2 Reverse	GTCTCGTGGGCTCGGAGATGTGTATAAGAGACAGATCCATGCGCGCAGTGGAAC	Sequencing primers with nextera adapters: CAN1-region2
717	CAN1 reg3 Forward	TCGTCGGCAGCGTCAGATGTGTATAAGAGACAGTTCAATTTTGGACGTACAAA	Sequencing primers with nextera adapters: CAN1-region3
718	CAN1 reg3 Reverse	GTCTCGTGGGCTCGGAGATGTGTATAAGAGACAGACCAGCAGTGATACCAACTA	Sequencing primers with nextera adapters: CAN1-region3
719	CAN1 reg4 Forward	TCGTCGGCAGCGTCAGATGTGTATAAGAGACAGCACATTTCAAGGTACTGAAC	Sequencing primers with nextera adapters: CAN1-region4
720	CAN1 reg4 Reverse	GTCTCGTGGGCTCGGAGATGTGTATAAGAGACAGTAGGAGCCAACTTGTTCTTT	Sequencing primers with nextera adapters: CAN1-region4
721	CAN1 reg5 Forward	TCGTCGGCAGCGTCAGATGTGTATAAGAGACAGCGTATTTTATTTGGTCTATC	Sequencing primers with nextera adapters: CAN1-region5
722	CAN1 reg5 Reverse	GTCTCGTGGGCTCGGAGATGTGTATAAGAGACAGAAACCTTGAATAATGATAAT	Sequencing primers with nextera adapters: CAN1-region5
723	CAN1 reg6 Forward	TCGTCGGCAGCGTCAGATGTGTATAAGAGACAGCGGCCACATTTATGACGATC	Sequencing primers with nextera adapters: CAN1-region6
724	CAN1 reg6 Reverse	GTCTCGTGGGCTCGGAGATGTGTATAAGAGACAGCTTTCTTTTCGGTGTATGAC	Sequencing primers with nextera adapters: CAN1-region6

## Sheet: Table S3.
	Supplementary Table 3. Plasmids used in this study
	Plasmid	Composition	Reference
	pRS416	pBluescript, URA3, CEN6, ARSH4	Sikorski and Hieter (1989)
	pEM3	pBluescript, URA3	This study
	pNL1	pBluescript, URA3, RNR1	This study
	pNL2	pBluescript, URA3, RNR1-truncated	This study
	pNL3	pBluescript, URA3, rnr1D57N	This study
	pNL4	pBluescript, URA3, rnr1Y285A	This study
	pNL5	pBluescript, URA3, rnr1Y285F	This study
	pNL6	pBluescript, URA3, rnr1D57N-truncated	This study
	pNL7	pBluescript, URA3, rnr1Y285F-truncated	This study

## Sheet: Table S4.
Supplementary Table 4. Samples used in this study
Sample_Name	Group	Group	Bio_Replicate_Number	GrpRep	Permissive	Technical_Replicate	Tech_Rep_Sample	Parent_Strain	pGAL	Growth_Condition	BioRepNumber	GAL
12_v.txt	rnr1D57N	rnr1D57N	1	rnr1D57N-Rep1	FALSE	FALSE		JSY14	FALSE	CAN	7	FALSE
13_v.txt	rnr1D57N	rnr1D57N	2	rnr1D57N-Rep2	FALSE	FALSE	172	JSY14	FALSE	CAN	7	FALSE
14_v.txt	rnr1D57N	rnr1D57N	3	rnr1D57N-Rep3	FALSE	FALSE	173	JSY14	FALSE	CAN	7	FALSE
15_v.txt	rnr1D57N	rnr1D57N	4	rnr1D57N-Rep4	FALSE	FALSE		JSY14	FALSE	CAN	7	FALSE
171_v.txt	rnr1D57N	rnr1D57N	1A	rnr1D57N-Rep1A	FALSE	TRUE		JSY14	FALSE	CAN	7	FALSE
172_v.txt	rnr1D57N	rnr1D57N	2A	rnr1D57N-Rep2A	FALSE	TRUE	13	JSY14	FALSE	CAN	7	FALSE
173_v.txt	rnr1D57N	rnr1D57N	3A	rnr1D57N-Rep3A	FALSE	TRUE	14	JSY14	FALSE	CAN	7	FALSE
186_v.txt	rnr1D57N	rnr1D57N	5	rnr1D57N-Rep5	FALSE	FALSE		JSY14	FALSE	CAN	7	FALSE
NL3_v.txt	rnr1D57N	rnr1D57N	6	rnr1D57N-Rep6	FALSE	FALSE		JSY3602	FALSE	CAN	7	FALSE
NL4_v.txt	rnr1D57N	rnr1D57N	7	rnr1D57N-Rep7	FALSE	FALSE		JSY3602	FALSE	CAN	7	FALSE
8_v.txt	rnr1D57N_perm	rnr1D57N	1	rnr1D57N_perm-Rep1	TRUE	FALSE		JSY14	FALSE	ARG	4	FALSE
9_v.txt	rnr1D57N_perm	rnr1D57N	2	rnr1D57N_perm-Rep2	TRUE	FALSE		JSY14	FALSE	ARG	4	FALSE
10_v.txt	rnr1D57N_perm	rnr1D57N	3	rnr1D57N_perm-Rep3	TRUE	FALSE		JSY14	FALSE	ARG	4	FALSE
11_v.txt	rnr1D57N_perm	rnr1D57N	4	rnr1D57N_perm-Rep4	TRUE	FALSE		JSY14	FALSE	ARG	4	FALSE
62_v.txt	rnr1Y285A	rnr1Y285A	1	rnr1Y285A-Rep1	FALSE	FALSE		JSY3868	FALSE	CAN	5	FALSE
63_v.txt	rnr1Y285A	rnr1Y285A	2	rnr1Y285A-Rep2	FALSE	FALSE		JSY3868	FALSE	CAN	5	FALSE
64_v.txt	rnr1Y285A	rnr1Y285A	3	rnr1Y285A-Rep3	FALSE	FALSE		JSY3869	FALSE	CAN	5	FALSE
65_v.txt	rnr1Y285A	rnr1Y285A	4	rnr1Y285A-Rep4	FALSE	FALSE		JSY3869	FALSE	CAN	5	FALSE
NL9_v.txt	rnr1Y285A	rnr1Y285A	5	rnr1Y285A-Rep5	FALSE	FALSE		JSY3868	FALSE	CAN	5	FALSE
58_v.txt	rnr1Y285A_perm	rnr1Y285A	1	rnr1Y285A_perm-Rep1	TRUE	FALSE		JSY3868	FALSE	ARG	4	FALSE
59_v.txt	rnr1Y285A_perm	rnr1Y285A	2	rnr1Y285A_perm-Rep2	TRUE	FALSE		JSY3868	FALSE	ARG	4	FALSE
60_v.txt	rnr1Y285A_perm	rnr1Y285A	3	rnr1Y285A_perm-Rep3	TRUE	FALSE		JSY3868	FALSE	ARG	4	FALSE
61_v.txt	rnr1Y285A_perm	rnr1Y285A	4	rnr1Y285A_perm-Rep4	TRUE	FALSE		JSY3868	FALSE	ARG	4	FALSE
137_v.txt	rnr1Y285A_pGAL	rnr1Y285A	1	rnr1Y285A_pGAL-Rep1	FALSE	FALSE		JSY2422	TRUE	CAN	6	FALSE
138_v.txt	rnr1Y285A_pGAL	rnr1Y285A	2	rnr1Y285A_pGAL-Rep2	FALSE	FALSE		JSY2422	TRUE	CAN	6	FALSE
139_v.txt	rnr1Y285A_pGAL	rnr1Y285A	3	rnr1Y285A_pGAL-Rep3	FALSE	FALSE		JSY2423	TRUE	CAN	6	FALSE
140_v.txt	rnr1Y285A_pGAL	rnr1Y285A	4	rnr1Y285A_pGAL-Rep4	FALSE	FALSE		JSY2423	TRUE	CAN	6	FALSE
176_v.txt	rnr1Y285A_pGAL	rnr1Y285A	5	rnr1Y285A_pGAL-Rep5	FALSE	FALSE		JSY2422	TRUE	CAN	6	FALSE
177_v.txt	rnr1Y285A_pGAL	rnr1Y285A	6	rnr1Y285A_pGAL-Rep6	FALSE	FALSE		JSY2423	TRUE	CAN	6	FALSE
42_v.txt	rnr1Y285F	rnr1Y285F	1	rnr1Y285F-Rep1	FALSE	FALSE		JSY3811	FALSE	CAN	8	FALSE
43_v.txt	rnr1Y285F	rnr1Y285F	2	rnr1Y285F-Rep2	FALSE	FALSE		JSY3811	FALSE	CAN	8	FALSE
44_v.txt	rnr1Y285F	rnr1Y285F	3	rnr1Y285F-Rep3	FALSE	FALSE		JSY3811	FALSE	CAN	8	FALSE
45_v.txt	rnr1Y285F	rnr1Y285F	4	rnr1Y285F-Rep4	FALSE	FALSE		JSY3811	FALSE	CAN	8	FALSE
161_v.txt	rnr1Y285F	rnr1Y285F	5	rnr1Y285F-Rep5	FALSE	FALSE		JSY3865	FALSE	CAN	8	FALSE
162_v.txt	rnr1Y285F	rnr1Y285F	6	rnr1Y285F-Rep6	FALSE	FALSE		JSY3865	FALSE	CAN	8	FALSE
163_v.txt	rnr1Y285F	rnr1Y285F	7	rnr1Y285F-Rep7	FALSE	FALSE		JSY3866	FALSE	CAN	8	FALSE
164_v.txt	rnr1Y285F	rnr1Y285F	8	rnr1Y285F-Rep8	FALSE	FALSE		JSY3866	FALSE	CAN	8	FALSE
40_v.txt	rnr1Y285F_perm	rnr1Y285F	1	rnr1Y285F_perm-Rep1	TRUE	FALSE		JSY3811	FALSE	ARG	4	FALSE
41_v.txt	rnr1Y285F_perm	rnr1Y285F	2	rnr1Y285F_perm-Rep2	TRUE	FALSE		JSY3811	FALSE	ARG	4	FALSE
165_v.txt	rnr1Y285F_perm	rnr1Y285F	3	rnr1Y285F_perm-Rep3	TRUE	FALSE		JSY3865	FALSE	ARG	4	FALSE
166_v.txt	rnr1Y285F_perm	rnr1Y285F	4	rnr1Y285F_perm-Rep4	TRUE	FALSE		JSY3866	FALSE	ARG	4	FALSE
133_v.txt	rnr1Y285F_pGAL	rnr1Y285F	1	rnr1Y285F_pGAL-Rep1	FALSE	FALSE		JSY2420	TRUE	CAN	6	FALSE
134_v.txt	rnr1Y285F_pGAL	rnr1Y285F	2	rnr1Y285F_pGAL-Rep2	FALSE	FALSE		JSY2420	TRUE	CAN	6	FALSE
135_v.txt	rnr1Y285F_pGAL	rnr1Y285F	3	rnr1Y285F_pGAL-Rep3	FALSE	FALSE		JSY2421	TRUE	CAN	6	FALSE
136_v.txt	rnr1Y285F_pGAL	rnr1Y285F	4	rnr1Y285F_pGAL-Rep4	FALSE	FALSE		JSY2421	TRUE	CAN	6	FALSE
174_v.txt	rnr1Y285F_pGAL	rnr1Y285F	5	rnr1Y285F_pGAL-Rep5	FALSE	FALSE		JSY2420	TRUE	CAN	6	FALSE
175_v.txt	rnr1Y285F_pGAL	rnr1Y285F	6	rnr1Y285F_pGAL-Rep6	FALSE	FALSE		JSY2421	TRUE	CAN	6	FALSE
5_v.txt	WT	WT	1	WT-Rep1	FALSE	FALSE		JSY13	FALSE	CAN	9	FALSE
6_v.txt	WT	WT	2	WT-Rep2	FALSE	FALSE		JSY13	FALSE	CAN	9	FALSE
7_v.txt	WT	WT	3	WT-Rep3	FALSE	FALSE		JSY13	FALSE	CAN	9	FALSE
168_v.txt	WT	WT	1A	WT-Rep1A	FALSE	TRUE		JSY13	FALSE	CAN	9	FALSE
169_v.txt	WT	WT	4	WT-Rep4	FALSE	FALSE		JSY13	FALSE	CAN	9	FALSE
170_v.txt	WT	WT	2A	WT-Rep2A	FALSE	TRUE		JSY13	FALSE	CAN	9	FALSE
187_v.txt	WT	WT	3A	WT-Rep3A	FALSE	TRUE		JSY13	FALSE	CAN	9	FALSE
188_v.txt	WT	WT	5	WT-Rep5	FALSE	FALSE		JSY13	FALSE	CAN	9	FALSE
129_v.txt	WT	WT	6	WT-Rep6	FALSE	FALSE		JSY2424	FALSE	CAN	9	FALSE
130_v.txt	WT	WT	7	WT-Rep7	FALSE	FALSE		JSY2424	FALSE	CAN	9	FALSE
131_v.txt	WT	WT	8	WT-Rep8	FALSE	FALSE		JSY2424	FALSE	CAN	9	FALSE
132_v.txt	WT	WT	9	WT-Rep9	FALSE	FALSE		JSY2424	FALSE	CAN	9	FALSE
127_v.txt	WT_perm	WT	1	WT_perm-Rep1	TRUE	FALSE		JSY2424	FALSE	ARG	6	FALSE
128_v.txt	WT_perm	WT	2	WT_perm-Rep2	TRUE	FALSE		JSY2424	FALSE	ARG	6	FALSE
1_v.txt	WT_perm	WT	3	WT_perm-Rep3	TRUE	FALSE		JSY13	FALSE	ARG	6	FALSE
2_v.txt	WT_perm	WT	4	WT_perm-Rep4	TRUE	FALSE		JSY13	FALSE	ARG	6	FALSE
3_v.txt	WT_perm	WT	5	WT_perm-Rep5	TRUE	FALSE		JSY13	FALSE	ARG	6	FALSE
4_v.txt	WT_perm	WT	6	WT_perm-Rep6	TRUE	FALSE		JSY13	FALSE	ARG	6	FALSE

## Sheet: Table S5
Supplementary Table 5: All variants from this study and the associated metadata
Source	Reference.Position	SNP.ID	Type	Length	Reference	Allele	Count	Coverage	Frequency	Average.quality	Group	pGAL	Growth.Condition	Parent.Strain	Bio.Rep	GrpRep	CONTEXT	SNV.Split	Ins.Split	Del.Split	SNV.Split	Clust.I.D.	Context_long	Context_left	Comp_context	triContext	compofref	compofvariant	SNVtrichange	SNV_TriContext	Extended_context	Genotype_reps	Tech_rep	GAL_status
12_v.txt	31723	31723-SNV-A-C	SNV	1	A	C	9	11167	0.0805946	47.7791	rnr1D57N	FALSE	CAN	JSY14	1	rnr1D57N-Rep1	CAA	A>C	G/C+1	A/T-1	TA>GC	TA>GC	TGTCCCAAAAAGT	AAAAAGT	GTT	GTT	T	G	T>G	T>G_GTT	TA>GC_AAAAAGT	7	FALSE	FALSE
12_v.txt	31840	31840-SNV-A-C	SNV	1	A	C	2	11167	0.0179099	64	rnr1D57N	FALSE	CAN	JSY14	1	rnr1D57N-Rep1	AAG	A>C	G/C+1	A/T-1	TA>GC	TA>GC	GAAATAAGATCCA	AGATCCA	TTC	TTC	T	G	T>G	T>G_TTC	TA>GC_AGATCCA	7	FALSE	FALSE
12_v.txt	31902	31902-SNV-A-C	SNV	1	A	C	7	11162	0.0627128	38	rnr1D57N	FALSE	CAN	JSY14	1	rnr1D57N-Rep1	GAA	A>C	G/C+1	A/T-1	TA>GC	TA>GC	CCATTGAATTTTG	AATTTTG	CTT	CTT	T	G	T>G	T>G_CTT	TA>GC_AATTTTG	7	FALSE	FALSE
12_v.txt	31913	31913-SNV-A-C	SNV	1	A	C	1	11162	0.00896	26	rnr1D57N	FALSE	CAN	JSY14	1	rnr1D57N-Rep1	CAA	A>C	G/C+1	A/T-1	TA>GC	TA>GC	TGGTGCAAAAGCC	AAAAGCC	GTT	GTT	T	G	T>G	T>G_GTT	TA>GC_AAAAGCC	7	FALSE	FALSE
12_v.txt	31950	31950-SNV-A-C	SNV	1	A	C	16	16625	0.0962406	29.1875	rnr1D57N	FALSE	CAN	JSY14	1	rnr1D57N-Rep1	CAT	A>C	G/C+1	A/T-1	TA>GC	TA>GC	ATCGTCATAAATG	ATAAATG	GTA	GTA	T	G	T>G	T>G_GTA	TA>GC_ATAAATG	7	FALSE	FALSE
12_v.txt	32005	32005-SNV-A-C	SNV	1	A	C	17	16625	0.102256	35.1176	rnr1D57N	FALSE	CAN	JSY14	1	rnr1D57N-Rep1	AAC	A>C	G/C+1	A/T-1	TA>GC	TA>GC	ATGGTAACTCGTC	ACTCGTC	TTG	TTG	T	G	T>G	T>G_TTG	TA>GC_ACTCGTC	7	FALSE	FALSE
12_v.txt	32086	32086-SNV-A-C	SNV	1	A	C	1	16624	0.00602	36	rnr1D57N	FALSE	CAN	JSY14	1	rnr1D57N-Rep1	AAG	A>C	G/C+1	A/T-1	TA>GC	TA>GC	CAAAAAAGCCTGC	AGCCTGC	TTC	TTC	T	G	T>G	T>G_TTC	TA>GC_AGCCTGC	7	FALSE	FALSE
12_v.txt	32103	32103-SNV-A-C	SNV	1	A	C	7	16625	0.0421053	64	rnr1D57N	FALSE	CAN	JSY14	1	rnr1D57N-Rep1	GAT	A>C	G/C+1	A/T-1	TA>GC	TA>GC	CCAGTGATATTTA	ATATTTA	CTA	CTA	T	G	T>G	T>G_CTA	TA>GC_ATATTTA	7	FALSE	FALSE
12_v.txt	32118	32118-SNV-T-G	SNV	1	T	G	1	16625	0.00602	64	rnr1D57N	FALSE	CAN	JSY14	1	rnr1D57N-Rep1	TTC	T>G	G/C+1	A/T-1	TA>GC	TA>GC	AGCCATTCGAAAA	TCGAAAA	AAG	TTC	T	C	T>G	T>G_TTC	TA>GC_TCGAAAA	7	FALSE	FALSE
12_v.txt	32152	32152-SNV-T-G	SNV	1	T	G	13	16625	0.0781955	46.615	rnr1D57N	FALSE	CAN	JSY14	1	rnr1D57N-Rep1	ATG	T>G	G/C+1	A/T-1	TA>GC	TA>GC	TCTCCATGTAAGC	TGTAAGC	TAC	ATG	T	C	T>G	T>G_ATG	TA>GC_TGTAAGC	7	FALSE	FALSE
12_v.txt	32284	32284-SNV-A-C	SNV	1	A	C	25	29225	0.0855432	37.7988	rnr1D57N	FALSE	CAN	JSY14	1	rnr1D57N-Rep1	TAA	A>C	G/C+1	A/T-1	TA>GC	TA>GC	CAACGTAAATATT	AAATATT	ATT	ATT	T	G	T>G	T>G_ATT	TA>GC_AAATATT	7	FALSE	FALSE
12_v.txt	32294	32294-SNV-A-C	SNV	1	A	C	542	29225	1.85458	53.5012	rnr1D57N	FALSE	CAN	JSY14	1	rnr1D57N-Rep1	AAT	A>C	G/C+1	A/T-1	TA>GC	TA>GC	ATTTGAATTTGCG	ATTTGCG	TTA	TTA	T	G	T>G	T>G_TTA	TA>GC_ATTTGCG	7	FALSE	FALSE
12_v.txt	32319	32319-SNV-A-C	SNV	1	A	C	27	29225	0.0923867	59.6296	rnr1D57N	FALSE	CAN	JSY14	1	rnr1D57N-Rep1	TAA	A>C	G/C+1	A/T-1	TA>GC	TA>GC	GTTGTTAAGATAA	AAGATAA	ATT	ATT	T	G	T>G	T>G_ATT	TA>GC_AAGATAA	7	FALSE	FALSE
12_v.txt	32360	32360-SNV-A-C	SNV	1	A	C	1	29224	0.00342	63.9979	rnr1D57N	FALSE	CAN	JSY14	1	rnr1D57N-Rep1	CAG	A>C	G/C+1	A/T-1	TA>GC	TA>GC	TGTACCAGAGTTC	AGAGTTC	GTC	GTC	T	G	T>G	T>G_GTC	TA>GC_AGAGTTC	7	FALSE	FALSE
12_v.txt	32441	32441-SNV-T-G	SNV	1	T	G	6	29225	0.0205304	51.8333	rnr1D57N	FALSE	CAN	JSY14	1	rnr1D57N-Rep1	CTA	T>G	G/C+1	A/T-1	TA>GC	TA>GC	TGGAACTAAAAGT	TAAAAGT	GAT	CTA	T	C	T>G	T>G_CTA	TA>GC_TAAAAGT	7	FALSE	FALSE
12_v.txt	32493	32493-SNV-A-C	SNV	1	A	C	8	29225	0.0273738	36.1261	rnr1D57N	FALSE	CAN	JSY14	1	rnr1D57N-Rep1	AAC	A>C	G/C+1	A/T-1	TA>GC	TA>GC	CGGAAAACAACTT	ACAACTT	TTG	TTG	T	G	T>G	T>G_TTG	TA>GC_ACAACTT	7	FALSE	FALSE
12_v.txt	32574	32574-SNV-T-G	SNV	1	T	G	681	26053	2.6139	37.066	rnr1D57N	FALSE	CAN	JSY14	1	rnr1D57N-Rep1	TTG	T>G	G/C+1	A/T-1	TA>GC	TA>GC	GTACCTTGAAATG	TGAAATG	AAC	TTG	T	C	T>G	T>G_TTG	TA>GC_TGAAATG	7	FALSE	FALSE
12_v.txt	32631	32631-SNV-T-G	SNV	1	T	G	2	26053	0.00768	53.5	rnr1D57N	FALSE	CAN	JSY14	1	rnr1D57N-Rep1	GTT	T>G	G/C+1	A/T-1	TA>GC	TA>GC	CCTTCGTTTTTAT	TTTTTAT	CAA	GTT	T	C	T>G	T>G_GTT	TA>GC_TTTTTAT	7	FALSE	FALSE
12_v.txt	32680	32680-SNV-A-C	SNV	1	A	C	9	26053	0.034545	63.2222	rnr1D57N	FALSE	CAN	JSY14	1	rnr1D57N-Rep1	CAA	A>C	G/C+1	A/T-1	TA>GC	TA>GC	TTCTCCAATAACG	AATAACG	GTT	GTT	T	G	T>G	T>G_GTT	TA>GC_AATAACG	7	FALSE	FALSE
12_v.txt	32739	32739-SNV-A-C	SNV	1	A	C	26	26053	0.0997966	57.6538	rnr1D57N	FALSE	CAN	JSY14	1	rnr1D57N-Rep1	TAT	A>C	G/C+1	A/T-1	TA>GC	TA>GC	CAGTATATTAGAA	ATTAGAA	ATA	ATA	T	G	T>G	T>G_ATA	TA>GC_ATTAGAA	7	FALSE	FALSE
12_v.txt	32760	32760-SNV-A-C	SNV	1	A	C	31	26053	0.118988	53.5159	rnr1D57N	FALSE	CAN	JSY14	1	rnr1D57N-Rep1	TAA	A>C	G/C+1	A/T-1	TA>GC	TA>GC	ATGGCTAAAACTT	AAAACTT	ATT	ATT	T	G	T>G	T>G_ATT	TA>GC_AAAACTT	7	FALSE	FALSE
12_v.txt	32785	32785-SNV-A-C	SNV	1	A	C	97	26053	0.372318	44.567	rnr1D57N	FALSE	CAN	JSY14	1	rnr1D57N-Rep1	AAC	A>C	G/C+1	A/T-1	TA>GC	TA>GC	CCCAGAACTCGAA	ACTCGAA	TTG	TTG	T	G	T>G	T>G_TTG	TA>GC_ACTCGAA	7	FALSE	FALSE
12_v.txt	32787	32787-SNV-T-G	SNV	1	T	G	4	26053	0.0153533	36.0001	rnr1D57N	FALSE	CAN	JSY14	1	rnr1D57N-Rep1	CTC	T>G	G/C+1	A/T-1	TA>GC	TA>GC	CAGAACTCGAATT	TCGAATT	GAG	CTC	T	C	T>G	T>G_CTC	TA>GC_TCGAATT	7	FALSE	FALSE
12_v.txt	32801	32801-SNV-A-C	SNV	1	A	C	23	26053	0.0882816	49.4347	rnr1D57N	FALSE	CAN	JSY14	1	rnr1D57N-Rep1	AAT	A>C	G/C+1	A/T-1	TA>GC	TA>GC	ACCGTAATATTTG	ATATTTG	TTA	TTA	T	G	T>G	T>G_TTA	TA>GC_ATATTTG	7	FALSE	FALSE
12_v.txt	32842	32842-SNV-A-C	SNV	1	A	C	2	26053	0.00768	38.0001	rnr1D57N	FALSE	CAN	JSY14	1	rnr1D57N-Rep1	CAA	A>C	G/C+1	A/T-1	TA>GC	TA>GC	TTACCCAAAAAAT	AAAAAAT	GTT	GTT	T	G	T>G	T>G_GTT	TA>GC_AAAAAAT	7	FALSE	FALSE
12_v.txt	32884	32884-SNV-A-C	SNV	1	A	C	2	21315	0.00938	37.5	rnr1D57N	FALSE	CAN	JSY14	1	rnr1D57N-Rep1	CAA	A>C	G/C+1	A/T-1	TA>GC	TA>GC	ACGTCCAAAATTG	AAAATTG	GTT	GTT	T	G	T>G	T>G_GTT	TA>GC_AAAATTG	7	FALSE	FALSE
12_v.txt	32915	32915-SNV-T-G	SNV	1	T	G	44	21315	0.206427	43.7536	rnr1D57N	FALSE	CAN	JSY14	1	rnr1D57N-Rep1	GTT	T>G	G/C+1	A/T-1	TA>GC	TA>GC	ACTAAGTTCCAGG	TTCCAGG	CAA	GTT	T	C	T>G	T>G_GTT	TA>GC_TTCCAGG	7	FALSE	FALSE
12_v.txt	32953	32953-SNV-T-G	SNV	1	T	G	7	21315	0.0328407	54.4286	rnr1D57N	FALSE	CAN	JSY14	1	rnr1D57N-Rep1	ATG	T>G	G/C+1	A/T-1	TA>GC	TA>GC	AATACATGTAACC	TGTAACC	TAC	ATG	T	C	T>G	T>G_ATG	TA>GC_TGTAACC	7	FALSE	FALSE
12_v.txt	32981	32981-SNV-A-C	SNV	1	A	C	9	21315	0.0422238	64	rnr1D57N	FALSE	CAN	JSY14	1	rnr1D57N-Rep1	GAG	A>C	G/C+1	A/T-1	TA>GC	TA>GC	TGCTGGAGAAAGG	AGAAAGG	CTC	CTC	T	G	T>G	T>G_CTC	TA>GC_AGAAAGG	7	FALSE	FALSE
12_v.txt	33054	33054-SNV-T-G	SNV	1	T	G	161	21315	0.755337	58.9315	rnr1D57N	FALSE	CAN	JSY14	1	rnr1D57N-Rep1	CTG	T>G	G/C+1	A/T-1	TA>GC	TA>GC	AAGGACTGCGTGA	TGCGTGA	GAC	CTG	T	C	T>G	T>G_CTG	TA>GC_TGCGTGA	7	FALSE	FALSE
12_v.txt	33192	33192-SNV-T-G	SNV	1	T	G	14	20300	0.0689655	31.7857	rnr1D57N	FALSE	CAN	JSY14	1	rnr1D57N-Rep1	ATG	T>G	G/C+1	A/T-1	TA>GC	TA>GC	CCAATATGTCTTT	TGTCTTT	TAC	ATG	T	C	T>G	T>G_ATG	TA>GC_TGTCTTT	7	FALSE	FALSE
12_v.txt	33204	33204-SNV-A-C	SNV	1	A	C	8	20300	0.0394089	29	rnr1D57N	FALSE	CAN	JSY14	1	rnr1D57N-Rep1	AAG	A>C	G/C+1	A/T-1	TA>GC	TA>GC	TGCTTAAGCTCTC	AGCTCTC	TTC	TTC	T	G	T>G	T>G_TTC	TA>GC_AGCTCTC	7	FALSE	FALSE
12_v.txt	33269	33269-SNV-A-C	SNV	1	A	C	141	20312	0.694171	15.6596	rnr1D57N	FALSE	CAN	JSY14	1	rnr1D57N-Rep1	TAG	A>C	G/C+1	A/T-1	TA>GC	TA>GC	CTCCATAGAGAAC	AGAGAAC	ATC	ATC	T	G	T>G	T>G_ATC	TA>GC_AGAGAAC	7	FALSE	FALSE
12_v.txt	33476	33476-SNV-T-G	SNV	1	T	G	2	20311	0.00985	36.999	rnr1D57N	FALSE	CAN	JSY14	1	rnr1D57N-Rep1	CTT	T>G	G/C+1	A/T-1	TA>GC	TA>GC	TATGCCTTTTTTT	TTTTTTT	GAA	CTT	T	C	T>G	T>G_CTT	TA>GC_TTTTTTT	7	FALSE	FALSE
12_v.txt	33477	33477-SNV-T-G	SNV	1	T	G	7	20308	0.0344692	36.8571	rnr1D57N	FALSE	CAN	JSY14	1	rnr1D57N-Rep1	TTT	T>G	G/C+1	A/T-1	TA>GC	TA>GC	ATGCCTTTTTTTT	TTTTTTT	AAA	TTT	T	C	T>G	T>G_TTT	TA>GC_TTTTTTT	7	FALSE	FALSE
12_v.txt	31723	31723-SNV-A-G	SNV	1	A	G	5	11167	0.0447748	43.4015	rnr1D57N	FALSE	CAN	JSY14	1	rnr1D57N-Rep1	CAA	A>G	G/C+1	A/T-1	TA>CG	TA>CG	TGTCCCAAAAAGT	AAAAAGT	GTT	GTT	T	C	T>C	T>C_GTT	TA>CG_AAAAAGT	7	FALSE	FALSE
12_v.txt	31822	31822-SNV-T-C	SNV	1	T	C	6	11167	0.0537297	50.6667	rnr1D57N	FALSE	CAN	JSY14	1	rnr1D57N-Rep1	CTG	T>C	G/C+1	A/T-1	TA>CG	TA>CG	TGCATCTGAATAT	TGAATAT	GAC	CTG	T	G	T>C	T>C_CTG	TA>CG_TGAATAT	7	FALSE	FALSE
12_v.txt	31876	31876-SNV-A-G	SNV	1	A	G	6	11167	0.0537297	33.0005	rnr1D57N	FALSE	CAN	JSY14	1	rnr1D57N-Rep1	TAG	A>G	G/C+1	A/T-1	TA>CG	TA>CG	AGATATAGGCGGC	AGGCGGC	ATC	ATC	T	C	T>C	T>C_ATC	TA>CG_AGGCGGC	7	FALSE	FALSE
12_v.txt	32086	32086-SNV-A-G	SNV	1	A	G	12	16624	0.0721848	61.8333	rnr1D57N	FALSE	CAN	JSY14	1	rnr1D57N-Rep1	AAG	A>G	G/C+1	A/T-1	TA>CG	TA>CG	CAAAAAAGCCTGC	AGCCTGC	TTC	TTC	T	C	T>C	T>C_TTC	TA>CG_AGCCTGC	7	FALSE	FALSE
12_v.txt	32123	32123-SNV-A-G	SNV	1	A	G	7	16622	0.0421129	27.9998	rnr1D57N	FALSE	CAN	JSY14	1	rnr1D57N-Rep1	AAA	A>G	G/C+1	A/T-1	TA>CG	TA>CG	TTCGAAAACTTTG	AACTTTG	TTT	TTT	T	C	T>C	T>C_TTT	TA>CG_AACTTTG	7	FALSE	FALSE
12_v.txt	32126	32126-SNV-T-C	SNV	1	T	C	3	16625	0.0180451	52.3319	rnr1D57N	FALSE	CAN	JSY14	1	rnr1D57N-Rep1	CTT	T>C	G/C+1	A/T-1	TA>CG	TA>CG	GAAAACTTTGTCA	TTTGTCA	GAA	CTT	T	G	T>C	T>C_CTT	TA>CG_TTTGTCA	7	FALSE	FALSE
12_v.txt	32132	32132-SNV-A-G	SNV	1	A	G	6	16625	0.0360902	38.6666	rnr1D57N	FALSE	CAN	JSY14	1	rnr1D57N-Rep1	CAC	A>G	G/C+1	A/T-1	TA>CG	TA>CG	TTTGTCACCACCA	ACCACCA	GTG	GTG	T	C	T>C	T>C_GTG	TA>CG_ACCACCA	7	FALSE	FALSE
12_v.txt	32275	32275-SNV-A-G	SNV	1	A	G	105	29226	0.359269	35.5333	rnr1D57N	FALSE	CAN	JSY14	1	rnr1D57N-Rep1	GAA	A>G	G/C+1	A/T-1	TA>CG	TA>CG	TACGGGAACCAAC	AACCAAC	CTT	CTT	T	C	T>C	T>C_CTT	TA>CG_AACCAAC	7	FALSE	FALSE
12_v.txt	32293	32293-SNV-A-G	SNV	1	A	G	52	29224	0.177936	53.7063	rnr1D57N	FALSE	CAN	JSY14	1	rnr1D57N-Rep1	GAA	A>G	G/C+1	A/T-1	TA>CG	TA>CG	TATTTGAATTTGC	AATTTGC	CTT	CTT	T	C	T>C	T>C_CTT	TA>CG_AATTTGC	7	FALSE	FALSE
12_v.txt	32346	32346-SNV-A-G	SNV	1	A	G	7	29223	0.0239537	60.2854	rnr1D57N	FALSE	CAN	JSY14	1	rnr1D57N-Rep1	CAA	A>G	G/C+1	A/T-1	TA>CG	TA>CG	TGTGGCAAAACCT	AAAACCT	GTT	GTT	T	C	T>C	T>C_GTT	TA>CG_AAAACCT	7	FALSE	FALSE
12_v.txt	32375	32375-SNV-A-G	SNV	1	A	G	10	29224	0.0342185	50.8	rnr1D57N	FALSE	CAN	JSY14	1	rnr1D57N-Rep1	CAA	A>G	G/C+1	A/T-1	TA>CG	TA>CG	AATAGCAATAATA	AATAATA	GTT	GTT	T	C	T>C	T>C_GTT	TA>CG_AATAATA	7	FALSE	FALSE
12_v.txt	32376	32376-SNV-A-G	SNV	1	A	G	5	29225	0.0171086	51.1997	rnr1D57N	FALSE	CAN	JSY14	1	rnr1D57N-Rep1	AAT	A>G	G/C+1	A/T-1	TA>CG	TA>CG	ATAGCAATAATAA	ATAATAA	TTA	TTA	T	C	T>C	T>C_TTA	TA>CG_ATAATAA	7	FALSE	FALSE
12_v.txt	32377	32377-SNV-T-C	SNV	1	T	C	10	29224	0.0342185	43.4995	rnr1D57N	FALSE	CAN	JSY14	1	rnr1D57N-Rep1	ATA	T>C	G/C+1	A/T-1	TA>CG	TA>CG	TAGCAATAATAAA	TAATAAA	TAT	ATA	T	G	T>C	T>C_ATA	TA>CG_TAATAAA	7	FALSE	FALSE
12_v.txt	32445	32445-SNV-A-G	SNV	1	A	G	603	29225	2.0633	53.4743	rnr1D57N	FALSE	CAN	JSY14	1	rnr1D57N-Rep1	AAG	A>G	G/C+1	A/T-1	TA>CG	TA>CG	ACTAAAAGTCCAA	AGTCCAA	TTC	TTC	T	C	T>C	T>C_TTC	TA>CG_AGTCCAA	7	FALSE	FALSE
12_v.txt	32543	32543-SNV-A-G	SNV	1	A	G	14	29224	0.0479058	20.7855	rnr1D57N	FALSE	CAN	JSY14	1	rnr1D57N-Rep1	CAC	A>G	G/C+1	A/T-1	TA>CG	TA>CG	AGCTTCACCAGCA	ACCAGCA	GTG	GTG	T	C	T>C	T>C_GTG	TA>CG_ACCAGCA	7	FALSE	FALSE
12_v.txt	32631	32631-SNV-T-C	SNV	1	T	C	9	26053	0.034545	46.3333	rnr1D57N	FALSE	CAN	JSY14	1	rnr1D57N-Rep1	GTT	T>C	G/C+1	A/T-1	TA>CG	TA>CG	CCTTCGTTTTTAT	TTTTTAT	CAA	GTT	T	G	T>C	T>C_GTT	TA>CG_TTTTTAT	7	FALSE	FALSE
12_v.txt	32728	32728-SNV-A-G	SNV	1	A	G	14	26053	0.0537366	56.9991	rnr1D57N	FALSE	CAN	JSY14	1	rnr1D57N-Rep1	CAA	A>G	G/C+1	A/T-1	TA>CG	TA>CG	CCATACAAAAACA	AAAAACA	GTT	GTT	T	C	T>C	T>C_GTT	TA>CG_AAAAACA	7	FALSE	FALSE
12_v.txt	32734	32734-SNV-A-G	SNV	1	A	G	30	26053	0.11515	60.1332	rnr1D57N	FALSE	CAN	JSY14	1	rnr1D57N-Rep1	CAG	A>G	G/C+1	A/T-1	TA>CG	TA>CG	AAAAACAGTATAT	AGTATAT	GTC	GTC	T	C	T>C	T>C_GTC	TA>CG_AGTATAT	7	FALSE	FALSE
12_v.txt	32759	32759-SNV-T-C	SNV	1	T	C	5	26053	0.0191916	54.5999	rnr1D57N	FALSE	CAN	JSY14	1	rnr1D57N-Rep1	CTA	T>C	G/C+1	A/T-1	TA>CG	TA>CG	AATGGCTAAAACT	TAAAACT	GAT	CTA	T	G	T>C	T>C_CTA	TA>CG_TAAAACT	7	FALSE	FALSE
12_v.txt	32787	32787-SNV-T-C	SNV	1	T	C	14	26053	0.0537366	42.9284	rnr1D57N	FALSE	CAN	JSY14	1	rnr1D57N-Rep1	CTC	T>C	G/C+1	A/T-1	TA>CG	TA>CG	CAGAACTCGAATT	TCGAATT	GAG	CTC	T	G	T>C	T>C_CTC	TA>CG_TCGAATT	7	FALSE	FALSE
12_v.txt	32814	32814-SNV-A-G	SNV	1	A	G	14	26053	0.0537366	33.8571	rnr1D57N	FALSE	CAN	JSY14	1	rnr1D57N-Rep1	GAA	A>G	G/C+1	A/T-1	TA>CG	TA>CG	ACAGGGAACAAGT	AACAAGT	CTT	CTT	T	C	T>C	T>C_CTT	TA>CG_AACAAGT	7	FALSE	FALSE
12_v.txt	32903	32903-SNV-A-G	SNV	1	A	G	5	21315	0.0234577	34.7802	rnr1D57N	FALSE	CAN	JSY14	1	rnr1D57N-Rep1	CAA	A>G	G/C+1	A/T-1	TA>CG	TA>CG	TTGGCCAACTACA	AACTACA	GTT	GTT	T	C	T>C	T>C_GTT	TA>CG_AACTACA	7	FALSE	FALSE
12_v.txt	32915	32915-SNV-T-C	SNV	1	T	C	8	21315	0.0375323	31.4873	rnr1D57N	FALSE	CAN	JSY14	1	rnr1D57N-Rep1	GTT	T>C	G/C+1	A/T-1	TA>CG	TA>CG	ACTAAGTTCCAGG	TTCCAGG	CAA	GTT	T	G	T>C	T>C_GTT	TA>CG_TTCCAGG	7	FALSE	FALSE
12_v.txt	32924	32924-SNV-A-G	SNV	1	A	G	4	21315	0.0187661	53.4987	rnr1D57N	FALSE	CAN	JSY14	1	rnr1D57N-Rep1	CAA	A>G	G/C+1	A/T-1	TA>CG	TA>CG	CAGGGCAAAAGTG	AAAAGTG	GTT	GTT	T	C	T>C	T>C_GTT	TA>CG_AAAAGTG	7	FALSE	FALSE
12_v.txt	32947	32947-SNV-A-G	SNV	1	A	G	42	21315	0.197044	60.2619	rnr1D57N	FALSE	CAN	JSY14	1	rnr1D57N-Rep1	CAA	A>G	G/C+1	A/T-1	TA>CG	TA>CG	AAAACCAATACAT	AATACAT	GTT	GTT	T	C	T>C	T>C_GTT	TA>CG_AATACAT	7	FALSE	FALSE
12_v.txt	32985	32985-SNV-A-G	SNV	1	A	G	44	21315	0.206427	60.1136	rnr1D57N	FALSE	CAN	JSY14	1	rnr1D57N-Rep1	AAG	A>G	G/C+1	A/T-1	TA>CG	TA>CG	GGAGAAAGGAATC	AGGAATC	TTC	TTC	T	C	T>C	T>C_TTC	TA>CG_AGGAATC	7	FALSE	FALSE
12_v.txt	33072	33072-SNV-A-G	SNV	1	A	G	8	21315	0.0375323	57.6245	rnr1D57N	FALSE	CAN	JSY14	1	rnr1D57N-Rep1	CAA	A>G	G/C+1	A/T-1	TA>CG	TA>CG	TATGCCAAAGAAC	AAAGAAC	GTT	GTT	T	C	T>C	T>C_GTT	TA>CG_AAAGAAC	7	FALSE	FALSE
12_v.txt	33126	33126-SNV-A-G	SNV	1	A	G	54	21315	0.253343	41.963	rnr1D57N	FALSE	CAN	JSY14	1	rnr1D57N-Rep1	CAG	A>G	G/C+1	A/T-1	TA>CG	TA>CG	TTGGTCAGAGGTG	AGAGGTG	GTC	GTC	T	C	T>C	T>C_GTC	TA>CG_AGAGGTG	7	FALSE	FALSE
12_v.txt	33192	33192-SNV-T-C	SNV	1	T	C	46	20300	0.226601	35.2609	rnr1D57N	FALSE	CAN	JSY14	1	rnr1D57N-Rep1	ATG	T>C	G/C+1	A/T-1	TA>CG	TA>CG	CCAATATGTCTTT	TGTCTTT	TAC	ATG	T	G	T>C	T>C_ATG	TA>CG_TGTCTTT	7	FALSE	FALSE
12_v.txt	33452	33452-SNV-T-C	SNV	1	T	C	9	20312	0.0443088	42.7778	rnr1D57N	FALSE	CAN	JSY14	1	rnr1D57N-Rep1	CTT	T>C	G/C+1	A/T-1	TA>CG	TA>CG	GTCTTCTTTTGAA	TTTTGAA	GAA	CTT	T	G	T>C	T>C_CTT	TA>CG_TTTTGAA	7	FALSE	FALSE
12_v.txt	33476	33476-SNV-T-C	SNV	1	T	C	31	20311	0.152627	31.6774	rnr1D57N	FALSE	CAN	JSY14	1	rnr1D57N-Rep1	CTT	T>C	G/C+1	A/T-1	TA>CG	TA>CG	TATGCCTTTTTTT	TTTTTTT	GAA	CTT	T	G	T>C	T>C_CTT	TA>CG_TTTTTTT	7	FALSE	FALSE
12_v.txt	31808	31808-SNV-A-T	SNV	1	A	T	1	11167	0.00896	31.9981	rnr1D57N	FALSE	CAN	JSY14	1	rnr1D57N-Rep1	AAA	A>T	A/T+1	A/T-1	TA>AT	TA>AT	CTTCCAAATAAAT	AATAAAT	TTT	TTT	T	A	T>A	T>A_TTT	TA>AT_AATAAAT	7	FALSE	FALSE
12_v.txt	31809	31809-SNV-A-T	SNV	1	A	T	1	11167	0.00896	47.9966	rnr1D57N	FALSE	CAN	JSY14	1	rnr1D57N-Rep1	AAT	A>T	A/T+1	A/T-1	TA>AT	TA>AT	TTCCAAATAAATC	ATAAATC	TTA	TTA	T	A	T>A	T>A_TTA	TA>AT_ATAAATC	7	FALSE	FALSE
12_v.txt	31816	31816-SNV-T-A	SNV	1	T	A	17	11167	0.152234	61.2941	rnr1D57N	FALSE	CAN	JSY14	1	rnr1D57N-Rep1	CTG	T>A	A/T+1	A/T-1	TA>AT	TA>AT	TAAATCTGCATCT	TGCATCT	GAC	CTG	T	T	T>A	T>A_CTG	TA>AT_TGCATCT	7	FALSE	FALSE
12_v.txt	31822	31822-SNV-T-A	SNV	1	T	A	28	11167	0.250739	55.8214	rnr1D57N	FALSE	CAN	JSY14	1	rnr1D57N-Rep1	CTG	T>A	A/T+1	A/T-1	TA>AT	TA>AT	TGCATCTGAATAT	TGAATAT	GAC	CTG	T	T	T>A	T>A_CTG	TA>AT_TGAATAT	7	FALSE	FALSE
12_v.txt	31840	31840-SNV-A-T	SNV	1	A	T	6	11167	0.0537297	59.6667	rnr1D57N	FALSE	CAN	JSY14	1	rnr1D57N-Rep1	AAG	A>T	A/T+1	A/T-1	TA>AT	TA>AT	GAAATAAGATCCA	AGATCCA	TTC	TTC	T	A	T>A	T>A_TTC	TA>AT_AGATCCA	7	FALSE	FALSE
12_v.txt	31903	31903-SNV-A-T	SNV	1	A	T	11	11162	0.0985486	46.4545	rnr1D57N	FALSE	CAN	JSY14	1	rnr1D57N-Rep1	AAT	A>T	A/T+1	A/T-1	TA>AT	TA>AT	CATTGAATTTTGG	ATTTTGG	TTA	TTA	T	A	T>A	T>A_TTA	TA>AT_ATTTTGG	7	FALSE	FALSE
12_v.txt	31996	31996-SNV-T-A	SNV	1	T	A	25	16625	0.150376	52.36	rnr1D57N	FALSE	CAN	JSY14	1	rnr1D57N-Rep1	TTA	T>A	A/T+1	A/T-1	TA>AT	TA>AT	TAGCTTTAAATGG	TAAATGG	AAT	TTA	T	T	T>A	T>A_TTA	TA>AT_TAAATGG	7	FALSE	FALSE
12_v.txt	32032	32032-SNV-T-A	SNV	1	T	A	17	16625	0.102256	58.7059	rnr1D57N	FALSE	CAN	JSY14	1	rnr1D57N-Rep1	TTC	T>A	A/T+1	A/T-1	TA>AT	TA>AT	GGTATTTCAAAGC	TCAAAGC	AAG	TTC	T	T	T>A	T>A_TTC	TA>AT_TCAAAGC	7	FALSE	FALSE
12_v.txt	32050	32050-SNV-T-A	SNV	1	T	A	57	16625	0.342857	61.9474	rnr1D57N	FALSE	CAN	JSY14	1	rnr1D57N-Rep1	CTG	T>A	A/T+1	A/T-1	TA>AT	TA>AT	TAAATCTGATGTG	TGATGTG	GAC	CTG	T	T	T>A	T>A_CTG	TA>AT_TGATGTG	7	FALSE	FALSE
12_v.txt	32055	32055-SNV-T-A	SNV	1	T	A	12	16625	0.0721805	59.8333	rnr1D57N	FALSE	CAN	JSY14	1	rnr1D57N-Rep1	GTG	T>A	A/T+1	A/T-1	TA>AT	TA>AT	CTGATGTGCGAGA	TGCGAGA	CAC	GTG	T	T	T>A	T>A_GTG	TA>AT_TGCGAGA	7	FALSE	FALSE
12_v.txt	32101	32101-SNV-T-A	SNV	1	T	A	3	16624	0.0180462	64	rnr1D57N	FALSE	CAN	JSY14	1	rnr1D57N-Rep1	GTG	T>A	A/T+1	A/T-1	TA>AT	TA>AT	CACCAGTGATATT	TGATATT	CAC	GTG	T	T	T>A	T>A_GTG	TA>AT_TGATATT	7	FALSE	FALSE
12_v.txt	32117	32117-SNV-T-A	SNV	1	T	A	3	16625	0.0180451	46.9969	rnr1D57N	FALSE	CAN	JSY14	1	rnr1D57N-Rep1	ATT	T>A	A/T+1	A/T-1	TA>AT	TA>AT	TAGCCATTCGAAA	TTCGAAA	TAA	ATT	T	T	T>A	T>A_ATT	TA>AT_TTCGAAA	7	FALSE	FALSE
12_v.txt	32123	32123-SNV-A-T	SNV	1	A	T	10	16622	0.0601612	10.5998	rnr1D57N	FALSE	CAN	JSY14	1	rnr1D57N-Rep1	AAA	A>T	A/T+1	A/T-1	TA>AT	TA>AT	TTCGAAAACTTTG	AACTTTG	TTT	TTT	T	A	T>A	T>A_TTT	TA>AT_AACTTTG	7	FALSE	FALSE
12_v.txt	32124	32124-SNV-A-T	SNV	1	A	T	2	16625	0.0120301	32.4996	rnr1D57N	FALSE	CAN	JSY14	1	rnr1D57N-Rep1	AAC	A>T	A/T+1	A/T-1	TA>AT	TA>AT	TCGAAAACTTTGT	ACTTTGT	TTG	TTG	T	A	T>A	T>A_TTG	TA>AT_ACTTTGT	7	FALSE	FALSE
12_v.txt	32130	32130-SNV-T-A	SNV	1	T	A	6	16625	0.0360902	44.3333	rnr1D57N	FALSE	CAN	JSY14	1	rnr1D57N-Rep1	GTC	T>A	A/T+1	A/T-1	TA>AT	TA>AT	ACTTTGTCACCAC	TCACCAC	CAG	GTC	T	T	T>A	T>A_GTC	TA>AT_TCACCAC	7	FALSE	FALSE
12_v.txt	32152	32152-SNV-T-A	SNV	1	T	A	2	16625	0.0120301	50.4972	rnr1D57N	FALSE	CAN	JSY14	1	rnr1D57N-Rep1	ATG	T>A	A/T+1	A/T-1	TA>AT	TA>AT	TCTCCATGTAAGC	TGTAAGC	TAC	ATG	T	T	T>A	T>A_ATG	TA>AT_TGTAAGC	7	FALSE	FALSE
12_v.txt	32275	32275-SNV-A-T	SNV	1	A	T	3	29226	0.0102648	28.3332	rnr1D57N	FALSE	CAN	JSY14	1	rnr1D57N-Rep1	GAA	A>T	A/T+1	A/T-1	TA>AT	TA>AT	TACGGGAACCAAC	AACCAAC	CTT	CTT	T	A	T>A	T>A_CTT	TA>AT_AACCAAC	7	FALSE	FALSE
12_v.txt	32283	32283-SNV-T-A	SNV	1	T	A	30	29225	0.102652	30.1378	rnr1D57N	FALSE	CAN	JSY14	1	rnr1D57N-Rep1	GTA	T>A	A/T+1	A/T-1	TA>AT	TA>AT	CCAACGTAAATAT	TAAATAT	CAT	GTA	T	T	T>A	T>A_GTA	TA>AT_TAAATAT	7	FALSE	FALSE
12_v.txt	32287	32287-SNV-T-A	SNV	1	T	A	21	29225	0.0718563	46.4762	rnr1D57N	FALSE	CAN	JSY14	1	rnr1D57N-Rep1	ATA	T>A	A/T+1	A/T-1	TA>AT	TA>AT	CGTAAATATTTGA	TATTTGA	TAT	ATA	T	T	T>A	T>A_ATA	TA>AT_TATTTGA	7	FALSE	FALSE
12_v.txt	32294	32294-SNV-A-T	SNV	1	A	T	12	29225	0.0410607	45.3291	rnr1D57N	FALSE	CAN	JSY14	1	rnr1D57N-Rep1	AAT	A>T	A/T+1	A/T-1	TA>AT	TA>AT	ATTTGAATTTGCG	ATTTGCG	TTA	TTA	T	A	T>A	T>A_TTA	TA>AT_ATTTGCG	7	FALSE	FALSE
12_v.txt	32376	32376-SNV-A-T	SNV	1	A	T	1	29225	0.00342	48.9993	rnr1D57N	FALSE	CAN	JSY14	1	rnr1D57N-Rep1	AAT	A>T	A/T+1	A/T-1	TA>AT	TA>AT	ATAGCAATAATAA	ATAATAA	TTA	TTA	T	A	T>A	T>A_TTA	TA>AT_ATAATAA	7	FALSE	FALSE
12_v.txt	32377	32377-SNV-T-A	SNV	1	T	A	2	29224	0.00684	63.9886	rnr1D57N	FALSE	CAN	JSY14	1	rnr1D57N-Rep1	ATA	T>A	A/T+1	A/T-1	TA>AT	TA>AT	TAGCAATAATAAA	TAATAAA	TAT	ATA	T	T	T>A	T>A_ATA	TA>AT_TAATAAA	7	FALSE	FALSE
12_v.txt	32475	32475-SNV-A-T	SNV	1	A	T	28	29225	0.0958084	45.7143	rnr1D57N	FALSE	CAN	JSY14	1	rnr1D57N-Rep1	GAA	A>T	A/T+1	A/T-1	TA>AT	TA>AT	ATGTAGAAGGTTA	AAGGTTA	CTT	CTT	T	A	T>A	T>A_CTT	TA>AT_AAGGTTA	7	FALSE	FALSE
12_v.txt	32498	32498-SNV-T-A	SNV	1	T	A	6	29225	0.0205304	42.1657	rnr1D57N	FALSE	CAN	JSY14	1	rnr1D57N-Rep1	CTT	T>A	A/T+1	A/T-1	TA>AT	TA>AT	AACAACTTTTTTG	TTTTTTG	GAA	CTT	T	T	T>A	T>A_CTT	TA>AT_TTTTTTG	7	FALSE	FALSE
12_v.txt	32541	32541-SNV-T-A	SNV	1	T	A	4	29225	0.0136869	37.7496	rnr1D57N	FALSE	CAN	JSY14	1	rnr1D57N-Rep1	TTC	T>A	A/T+1	A/T-1	TA>AT	TA>AT	GCAGCTTCACCAG	TCACCAG	AAG	TTC	T	T	T>A	T>A_TTC	TA>AT_TCACCAG	7	FALSE	FALSE
12_v.txt	32543	32543-SNV-A-T	SNV	1	A	T	20	29224	0.0684369	15.0993	rnr1D57N	FALSE	CAN	JSY14	1	rnr1D57N-Rep1	CAC	A>T	A/T+1	A/T-1	TA>AT	TA>AT	AGCTTCACCAGCA	ACCAGCA	GTG	GTG	T	A	T>A	T>A_GTG	TA>AT_ACCAGCA	7	FALSE	FALSE
12_v.txt	32574	32574-SNV-T-A	SNV	1	T	A	8	26053	0.0307066	37.25	rnr1D57N	FALSE	CAN	JSY14	1	rnr1D57N-Rep1	TTG	T>A	A/T+1	A/T-1	TA>AT	TA>AT	GTACCTTGAAATG	TGAAATG	AAC	TTG	T	T	T>A	T>A_TTG	TA>AT_TGAAATG	7	FALSE	FALSE
12_v.txt	32581	32581-SNV-T-A	SNV	1	T	A	3	26053	0.011515	33.3305	rnr1D57N	FALSE	CAN	JSY14	1	rnr1D57N-Rep1	GTG	T>A	A/T+1	A/T-1	TA>AT	TA>AT	GAAATGTGAAGGC	TGAAGGC	CAC	GTG	T	T	T>A	T>A_GTG	TA>AT_TGAAGGC	7	FALSE	FALSE
12_v.txt	32631	32631-SNV-T-A	SNV	1	T	A	6	26053	0.02303	59.5	rnr1D57N	FALSE	CAN	JSY14	1	rnr1D57N-Rep1	GTT	T>A	A/T+1	A/T-1	TA>AT	TA>AT	CCTTCGTTTTTAT	TTTTTAT	CAA	GTT	T	T	T>A	T>A_GTT	TA>AT_TTTTTAT	7	FALSE	FALSE
12_v.txt	32734	32734-SNV-A-T	SNV	1	A	T	4	26053	0.0153533	50.2495	rnr1D57N	FALSE	CAN	JSY14	1	rnr1D57N-Rep1	CAG	A>T	A/T+1	A/T-1	TA>AT	TA>AT	AAAAACAGTATAT	AGTATAT	GTC	GTC	T	A	T>A	T>A_GTC	TA>AT_AGTATAT	7	FALSE	FALSE
12_v.txt	32759	32759-SNV-T-A	SNV	1	T	A	4	26053	0.0153533	21.2497	rnr1D57N	FALSE	CAN	JSY14	1	rnr1D57N-Rep1	CTA	T>A	A/T+1	A/T-1	TA>AT	TA>AT	AATGGCTAAAACT	TAAAACT	GAT	CTA	T	T	T>A	T>A_CTA	TA>AT_TAAAACT	7	FALSE	FALSE
12_v.txt	32803	32803-SNV-A-T	SNV	1	A	T	13	26053	0.0498983	46.3077	rnr1D57N	FALSE	CAN	JSY14	1	rnr1D57N-Rep1	TAT	A>T	A/T+1	A/T-1	TA>AT	TA>AT	CGTAATATTTGAC	ATTTGAC	ATA	ATA	T	A	T>A	T>A_ATA	TA>AT_ATTTGAC	7	FALSE	FALSE
12_v.txt	32806	32806-SNV-T-A	SNV	1	T	A	42	26053	0.16121	44.4048	rnr1D57N	FALSE	CAN	JSY14	1	rnr1D57N-Rep1	TTG	T>A	A/T+1	A/T-1	TA>AT	TA>AT	AATATTTGACAGG	TGACAGG	AAC	TTG	T	T	T>A	T>A_TTG	TA>AT_TGACAGG	7	FALSE	FALSE
12_v.txt	32814	32814-SNV-A-T	SNV	1	A	T	5	26053	0.0191916	18.4	rnr1D57N	FALSE	CAN	JSY14	1	rnr1D57N-Rep1	GAA	A>T	A/T+1	A/T-1	TA>AT	TA>AT	ACAGGGAACAAGT	AACAAGT	CTT	CTT	T	A	T>A	T>A_CTT	TA>AT_AACAAGT	7	FALSE	FALSE
12_v.txt	32938	32938-SNV-A-T	SNV	1	A	T	891	21315	4.18015	56.9774	rnr1D57N	FALSE	CAN	JSY14	1	rnr1D57N-Rep1	CAA	A>T	A/T+1	A/T-1	TA>AT	TA>AT	TTGCCCAAGAAAA	AAGAAAA	GTT	GTT	T	A	T>A	T>A_GTT	TA>AT_AAGAAAA	7	FALSE	FALSE
12_v.txt	32992	32992-SNV-T-A	SNV	1	T	A	25	21315	0.117288	61.6	rnr1D57N	FALSE	CAN	JSY14	1	rnr1D57N-Rep1	CTT	T>A	A/T+1	A/T-1	TA>AT	TA>AT	GGAATCTTTGTGA	TTTGTGA	GAA	CTT	T	T	T>A	T>A_CTT	TA>AT_TTTGTGA	7	FALSE	FALSE
12_v.txt	33054	33054-SNV-T-A	SNV	1	T	A	4	21315	0.0187661	50.4991	rnr1D57N	FALSE	CAN	JSY14	1	rnr1D57N-Rep1	CTG	T>A	A/T+1	A/T-1	TA>AT	TA>AT	AAGGACTGCGTGA	TGCGTGA	GAC	CTG	T	T	T>A	T>A_CTG	TA>AT_TGCGTGA	7	FALSE	FALSE
12_v.txt	33066	33066-SNV-T-A	SNV	1	T	A	5	21314	0.0234588	43.7986	rnr1D57N	FALSE	CAN	JSY14	1	rnr1D57N-Rep1	ATA	T>A	A/T+1	A/T-1	TA>AT	TA>AT	ACAGAATATGCCA	TATGCCA	TAT	ATA	T	T	T>A	T>A_ATA	TA>AT_TATGCCA	7	FALSE	FALSE
12_v.txt	33090	33090-SNV-T-A	SNV	1	T	A	2	21315	0.00938	50.9909	rnr1D57N	FALSE	CAN	JSY14	1	rnr1D57N-Rep1	ATA	T>A	A/T+1	A/T-1	TA>AT	TA>AT	AATAAATATGATA	TATGATA	TAT	ATA	T	T	T>A	T>A_ATA	TA>AT_TATGATA	7	FALSE	FALSE
12_v.txt	33094	33094-SNV-A-T	SNV	1	A	T	5	21315	0.0234577	40.1997	rnr1D57N	FALSE	CAN	JSY14	1	rnr1D57N-Rep1	GAT	A>T	A/T+1	A/T-1	TA>AT	TA>AT	AATATGATATAAG	ATATAAG	CTA	CTA	T	A	T>A	T>A_CTA	TA>AT_ATATAAG	7	FALSE	FALSE
12_v.txt	33295	33295-SNV-T-A	SNV	1	T	A	15	20312	0.073848	50.9333	rnr1D57N	FALSE	CAN	JSY14	1	rnr1D57N-Rep1	CTC	T>A	A/T+1	A/T-1	TA>AT	TA>AT	TTACTCTCGTCGG	TCGTCGG	GAG	CTC	T	T	T>A	T>A_CTC	TA>AT_TCGTCGG	7	FALSE	FALSE
12_v.txt	33321	33321-SNV-A-T	SNV	1	A	T	21	20312	0.103387	61.7143	rnr1D57N	FALSE	CAN	JSY14	1	rnr1D57N-Rep1	CAA	A>T	A/T+1	A/T-1	TA>AT	TA>AT	GGATACAATTCTT	AATTCTT	GTT	GTT	T	A	T>A	T>A_GTT	TA>AT_AATTCTT	7	FALSE	FALSE
12_v.txt	31650	31650-SNV-C-T	SNV	1	C	T	34	11167	0.304469	36.7941	rnr1D57N	FALSE	CAN	JSY14	1	rnr1D57N-Rep1	GCG	C>T	A/T+1	G/C-1	CG>TA	CG>TA	AGAATGCGAAATG	CGAAATG	CGC	GCG	C	A	C>T	C>T_GCG	CG>TA_CGAAATG	7	FALSE	FALSE
12_v.txt	31806	31806-SNV-C-T	SNV	1	C	T	281	11167	2.51634	58.2213	rnr1D57N	FALSE	CAN	JSY14	1	rnr1D57N-Rep1	CCA	C>T	A/T+1	G/C-1	CG>TA	CG>TA	ATCTTCCAAATAA	CAAATAA	GGT	CCA	C	A	C>T	C>T_CCA	CG>TA_CAAATAA	7	FALSE	FALSE
12_v.txt	31881	31881-SNV-G-A	SNV	1	G	A	14	11167	0.125369	40.2463	rnr1D57N	FALSE	CAN	JSY14	1	rnr1D57N-Rep1	GGC	G>A	A/T+1	G/C-1	CG>TA	CG>TA	TAGGCGGCAGCAA	GCAGCAA	CCG	CCG	C	T	C>T	C>T_CCG	CG>TA_GCAGCAA	7	FALSE	FALSE
12_v.txt	31882	31882-SNV-C-T	SNV	1	C	T	17	11167	0.152234	46.1131	rnr1D57N	FALSE	CAN	JSY14	1	rnr1D57N-Rep1	GCA	C>T	A/T+1	G/C-1	CG>TA	CG>TA	AGGCGGCAGCAAA	CAGCAAA	CGT	GCA	C	A	C>T	C>T_GCA	CG>TA_CAGCAAA	7	FALSE	FALSE
12_v.txt	31956	31956-SNV-G-A	SNV	1	G	A	2	16625	0.0120301	37.9995	rnr1D57N	FALSE	CAN	JSY14	1	rnr1D57N-Rep1	TGT	G>A	A/T+1	G/C-1	CG>TA	CG>TA	ATAAATGTGGCCG	GTGGCCG	ACA	ACA	C	T	C>T	C>T_ACA	CG>TA_GTGGCCG	7	FALSE	FALSE
12_v.txt	31962	31962-SNV-G-A	SNV	1	G	A	34	16625	0.204511	37.2941	rnr1D57N	FALSE	CAN	JSY14	1	rnr1D57N-Rep1	CGC	G>A	A/T+1	G/C-1	CG>TA	CG>TA	GTGGCCGCATAAT	GCATAAT	GCG	GCG	C	T	C>T	C>T_GCG	CG>TA_GCATAAT	7	FALSE	FALSE
12_v.txt	31972	31972-SNV-C-T	SNV	1	C	T	14	16625	0.0842105	37.2143	rnr1D57N	FALSE	CAN	JSY14	1	rnr1D57N-Rep1	GCC	C>T	A/T+1	G/C-1	CG>TA	CG>TA	AATAAGCCAAGCC	CCAAGCC	CGG	GCC	C	A	C>T	C>T_GCC	CG>TA_CCAAGCC	7	FALSE	FALSE
12_v.txt	31981	31981-SNV-G-A	SNV	1	G	A	19	16625	0.114286	51.7895	rnr1D57N	FALSE	CAN	JSY14	1	rnr1D57N-Rep1	GGC	G>A	A/T+1	G/C-1	CG>TA	CG>TA	AGCCGGGCATTAA	GCATTAA	CCG	CCG	C	T	C>T	C>T_CCG	CG>TA_GCATTAA	7	FALSE	FALSE
12_v.txt	32041	32041-SNV-G-A	SNV	1	G	A	36	16625	0.216541	60.6944	rnr1D57N	FALSE	CAN	JSY14	1	rnr1D57N-Rep1	TGC	G>A	A/T+1	G/C-1	CG>TA	CG>TA	AAGCTTGCATAAA	GCATAAA	ACG	ACG	C	T	C>T	C>T_ACG	CG>TA_GCATAAA	7	FALSE	FALSE
12_v.txt	32057	32057-SNV-C-T	SNV	1	C	T	16	16625	0.0962406	62.875	rnr1D57N	FALSE	CAN	JSY14	1	rnr1D57N-Rep1	GCG	C>T	A/T+1	G/C-1	CG>TA	CG>TA	GATGTGCGAGATT	CGAGATT	CGC	GCG	C	A	C>T	C>T_GCG	CG>TA_CGAGATT	7	FALSE	FALSE
12_v.txt	32075	32075-SNV-C-T	SNV	1	C	T	15	16625	0.0902256	59.6	rnr1D57N	FALSE	CAN	JSY14	1	rnr1D57N-Rep1	ACC	C>T	A/T+1	G/C-1	CG>TA	CG>TA	AAATAACCATGCA	CCATGCA	TGG	ACC	C	A	C>T	C>T_ACC	CG>TA_CCATGCA	7	FALSE	FALSE
12_v.txt	32087	32087-SNV-G-A	SNV	1	G	A	4	16625	0.0240601	58.2495	rnr1D57N	FALSE	CAN	JSY14	1	rnr1D57N-Rep1	AGC	G>A	A/T+1	G/C-1	CG>TA	CG>TA	AAAAAAGCCTGCA	GCCTGCA	TCG	TCG	C	T	C>T	C>T_TCG	CG>TA_GCCTGCA	7	FALSE	FALSE
12_v.txt	32088	32088-SNV-C-T	SNV	1	C	T	64	16625	0.384962	59.9689	rnr1D57N	FALSE	CAN	JSY14	1	rnr1D57N-Rep1	GCC	C>T	A/T+1	G/C-1	CG>TA	CG>TA	AAAAAGCCTGCAA	CCTGCAA	CGG	GCC	C	A	C>T	C>T_GCC	CG>TA_CCTGCAA	7	FALSE	FALSE
12_v.txt	32091	32091-SNV-G-A	SNV	1	G	A	13	16624	0.0782002	61.6923	rnr1D57N	FALSE	CAN	JSY14	1	rnr1D57N-Rep1	TGC	G>A	A/T+1	G/C-1	CG>TA	CG>TA	AAGCCTGCAACAC	GCAACAC	ACG	ACG	C	T	C>T	C>T_ACG	CG>TA_GCAACAC	7	FALSE	FALSE
12_v.txt	32092	32092-SNV-C-T	SNV	1	C	T	21	16624	0.126323	62.3318	rnr1D57N	FALSE	CAN	JSY14	1	rnr1D57N-Rep1	GCA	C>T	A/T+1	G/C-1	CG>TA	CG>TA	AGCCTGCAACACC	CAACACC	CGT	GCA	C	A	C>T	C>T_GCA	CG>TA_CAACACC	7	FALSE	FALSE
12_v.txt	32097	32097-SNV-C-T	SNV	1	C	T	14	16625	0.0842105	62.5714	rnr1D57N	FALSE	CAN	JSY14	1	rnr1D57N-Rep1	ACC	C>T	A/T+1	G/C-1	CG>TA	CG>TA	GCAACACCAGTGA	CCAGTGA	TGG	ACC	C	A	C>T	C>T_ACC	CG>TA_CCAGTGA	7	FALSE	FALSE
12_v.txt	32100	32100-SNV-G-A	SNV	1	G	A	6	16625	0.0360902	64	rnr1D57N	FALSE	CAN	JSY14	1	rnr1D57N-Rep1	AGT	G>A	A/T+1	G/C-1	CG>TA	CG>TA	ACACCAGTGATAT	GTGATAT	TCA	TCA	C	T	C>T	C>T_TCA	CG>TA_GTGATAT	7	FALSE	FALSE
12_v.txt	32114	32114-SNV-C-T	SNV	1	C	T	11	16625	0.0661654	53.1817	rnr1D57N	FALSE	CAN	JSY14	1	rnr1D57N-Rep1	GCC	C>T	A/T+1	G/C-1	CG>TA	CG>TA	TAATAGCCATTCG	CCATTCG	CGG	GCC	C	A	C>T	C>T_GCC	CG>TA_CCATTCG	7	FALSE	FALSE
12_v.txt	32115	32115-SNV-C-T	SNV	1	C	T	4	16625	0.0240601	39.2488	rnr1D57N	FALSE	CAN	JSY14	1	rnr1D57N-Rep1	CCA	C>T	A/T+1	G/C-1	CG>TA	CG>TA	AATAGCCATTCGA	CATTCGA	GGT	CCA	C	A	C>T	C>T_CCA	CG>TA_CATTCGA	7	FALSE	FALSE
12_v.txt	32165	32165-SNV-G-A	SNV	1	G	A	20	16625	0.120301	43.8491	rnr1D57N	FALSE	CAN	JSY14	1	rnr1D57N-Rep1	CGC	G>A	A/T+1	G/C-1	CG>TA	CG>TA	CAAAGCGCCAAAT	GCCAAAT	GCG	GCG	C	T	C>T	C>T_GCG	CG>TA_GCCAAAT	7	FALSE	FALSE
12_v.txt	32271	32271-SNV-C-T	SNV	1	C	T	43	29226	0.147129	31.5346	rnr1D57N	FALSE	CAN	JSY14	1	rnr1D57N-Rep1	ACG	C>T	A/T+1	G/C-1	CG>TA	CG>TA	AAAATACGGGAAC	CGGGAAC	TGC	ACG	C	A	C>T	C>T_ACG	CG>TA_CGGGAAC	7	FALSE	FALSE
12_v.txt	32272	32272-SNV-G-A	SNV	1	G	A	152	29226	0.520085	37.4014	rnr1D57N	FALSE	CAN	JSY14	1	rnr1D57N-Rep1	CGG	G>A	A/T+1	G/C-1	CG>TA	CG>TA	AAATACGGGAACC	GGGAACC	GCC	GCC	C	T	C>T	C>T_GCC	CG>TA_GGGAACC	7	FALSE	FALSE
12_v.txt	32274	32274-SNV-G-A	SNV	1	G	A	60	29226	0.205297	36.85	rnr1D57N	FALSE	CAN	JSY14	1	rnr1D57N-Rep1	GGA	G>A	A/T+1	G/C-1	CG>TA	CG>TA	ATACGGGAACCAA	GAACCAA	CCT	CCT	C	T	C>T	C>T_CCT	CG>TA_GAACCAA	7	FALSE	FALSE
12_v.txt	32299	32299-SNV-C-T	SNV	1	C	T	46	29225	0.157399	50.6957	rnr1D57N	FALSE	CAN	JSY14	1	rnr1D57N-Rep1	GCG	C>T	A/T+1	G/C-1	CG>TA	CG>TA	AATTTGCGGCAGA	CGGCAGA	CGC	GCG	C	A	C>T	C>T_GCG	CG>TA_CGGCAGA	7	FALSE	FALSE
12_v.txt	32301	32301-SNV-G-A	SNV	1	G	A	21	29225	0.0718563	59.0952	rnr1D57N	FALSE	CAN	JSY14	1	rnr1D57N-Rep1	GGC	G>A	A/T+1	G/C-1	CG>TA	CG>TA	TTTGCGGCAGAAA	GCAGAAA	CCG	CCG	C	T	C>T	C>T_CCG	CG>TA_GCAGAAA	7	FALSE	FALSE
12_v.txt	32313	32313-SNV-G-A	SNV	1	G	A	53	29225	0.181352	58.7736	rnr1D57N	FALSE	CAN	JSY14	1	rnr1D57N-Rep1	GGT	G>A	A/T+1	G/C-1	CG>TA	CG>TA	ATAATGGTTGTTA	GTTGTTA	CCA	CCA	C	T	C>T	C>T_CCA	CG>TA_GTTGTTA	7	FALSE	FALSE
12_v.txt	32344	32344-SNV-G-A	SNV	1	G	A	23	29225	0.0786997	62.3913	rnr1D57N	FALSE	CAN	JSY14	1	rnr1D57N-Rep1	GGC	G>A	A/T+1	G/C-1	CG>TA	CG>TA	TATGTGGCAAAAC	GCAAAAC	CCG	CCG	C	T	C>T	C>T_CCG	CG>TA_GCAAAAC	7	FALSE	FALSE
12_v.txt	32361	32361-SNV-G-A	SNV	1	G	A	3	29224	0.0102655	63.9995	rnr1D57N	FALSE	CAN	JSY14	1	rnr1D57N-Rep1	AGA	G>A	A/T+1	G/C-1	CG>TA	CG>TA	GTACCAGAGTTCT	GAGTTCT	TCT	TCT	C	T	C>T	C>T_TCT	CG>TA_GAGTTCT	7	FALSE	FALSE
12_v.txt	32449	32449-SNV-C-T	SNV	1	C	T	71	29225	0.242943	50.3803	rnr1D57N	FALSE	CAN	JSY14	1	rnr1D57N-Rep1	CCA	C>T	A/T+1	G/C-1	CG>TA	CG>TA	AAAGTCCAATGAA	CAATGAA	GGT	CCA	C	A	C>T	C>T_CCA	CG>TA_CAATGAA	7	FALSE	FALSE
12_v.txt	32466	32466-SNV-C-T	SNV	1	C	T	41	29225	0.140291	49.7805	rnr1D57N	FALSE	CAN	JSY14	1	rnr1D57N-Rep1	GCC	C>T	A/T+1	G/C-1	CG>TA	CG>TA	AGAGAGCCAATGT	CCAATGT	CGG	GCC	C	A	C>T	C>T_GCC	CG>TA_CCAATGT	7	FALSE	FALSE
12_v.txt	32487	32487-SNV-C-T	SNV	1	C	T	29	29225	0.0992301	41.3452	rnr1D57N	FALSE	CAN	JSY14	1	rnr1D57N-Rep1	ACG	C>T	A/T+1	G/C-1	CG>TA	CG>TA	AAGATACGGAAAA	CGGAAAA	TGC	ACG	C	A	C>T	C>T_ACG	CG>TA_CGGAAAA	7	FALSE	FALSE
12_v.txt	32488	32488-SNV-G-A	SNV	1	G	A	53	29225	0.181352	46.7934	rnr1D57N	FALSE	CAN	JSY14	1	rnr1D57N-Rep1	CGG	G>A	A/T+1	G/C-1	CG>TA	CG>TA	AGATACGGAAAAC	GGAAAAC	GCC	GCC	C	T	C>T	C>T_GCC	CG>TA_GGAAAAC	7	FALSE	FALSE
12_v.txt	32535	32535-SNV-G-A	SNV	1	G	A	34	29225	0.116339	36.8232	rnr1D57N	FALSE	CAN	JSY14	1	rnr1D57N-Rep1	TGC	G>A	A/T+1	G/C-1	CG>TA	CG>TA	GGGTTTGCAGCTT	GCAGCTT	ACG	ACG	C	T	C>T	C>T_ACG	CG>TA_GCAGCTT	7	FALSE	FALSE
12_v.txt	32536	32536-SNV-C-T	SNV	1	C	T	39	29225	0.133447	37.0513	rnr1D57N	FALSE	CAN	JSY14	1	rnr1D57N-Rep1	GCA	C>T	A/T+1	G/C-1	CG>TA	CG>TA	GGTTTGCAGCTTC	CAGCTTC	CGT	GCA	C	A	C>T	C>T_GCA	CG>TA_CAGCTTC	7	FALSE	FALSE
12_v.txt	32542	32542-SNV-C-T	SNV	1	C	T	41	29225	0.140291	37.1463	rnr1D57N	FALSE	CAN	JSY14	1	rnr1D57N-Rep1	TCA	C>T	A/T+1	G/C-1	CG>TA	CG>TA	CAGCTTCACCAGC	CACCAGC	AGT	TCA	C	A	C>T	C>T_TCA	CG>TA_CACCAGC	7	FALSE	FALSE
12_v.txt	32544	32544-SNV-C-T	SNV	1	C	T	142	29224	0.485902	37.4857	rnr1D57N	FALSE	CAN	JSY14	1	rnr1D57N-Rep1	ACC	C>T	A/T+1	G/C-1	CG>TA	CG>TA	GCTTCACCAGCAG	CCAGCAG	TGG	ACC	C	A	C>T	C>T_ACC	CG>TA_CCAGCAG	7	FALSE	FALSE
12_v.txt	32545	32545-SNV-C-T	SNV	1	C	T	17	29224	0.0581714	37.1671	rnr1D57N	FALSE	CAN	JSY14	1	rnr1D57N-Rep1	CCA	C>T	A/T+1	G/C-1	CG>TA	CG>TA	CTTCACCAGCAGT	CAGCAGT	GGT	CCA	C	A	C>T	C>T_CCA	CG>TA_CAGCAGT	7	FALSE	FALSE
12_v.txt	32580	32580-SNV-G-A	SNV	1	G	A	10	26053	0.0383833	28.2975	rnr1D57N	FALSE	CAN	JSY14	1	rnr1D57N-Rep1	TGT	G>A	A/T+1	G/C-1	CG>TA	CG>TA	TGAAATGTGAAGG	GTGAAGG	ACA	ACA	C	T	C>T	C>T_ACA	CG>TA_GTGAAGG	7	FALSE	FALSE
12_v.txt	32590	32590-SNV-C-T	SNV	1	C	T	41	26053	0.157372	37.2927	rnr1D57N	FALSE	CAN	JSY14	1	rnr1D57N-Rep1	GCG	C>T	A/T+1	G/C-1	CG>TA	CG>TA	AGGCAGCGTTAAT	CGTTAAT	CGC	GCG	C	A	C>T	C>T_GCG	CG>TA_CGTTAAT	7	FALSE	FALSE
12_v.txt	32609	32609-SNV-C-T	SNV	1	C	T	47	26053	0.180401	47.6368	rnr1D57N	FALSE	CAN	JSY14	1	rnr1D57N-Rep1	CCC	C>T	A/T+1	G/C-1	CG>TA	CG>TA	GGAAACCCAACCT	CCAACCT	GGG	CCC	C	A	C>T	C>T_CCC	CG>TA_CCAACCT	7	FALSE	FALSE
12_v.txt	32610	32610-SNV-C-T	SNV	1	C	T	31	26051	0.118997	50.606	rnr1D57N	FALSE	CAN	JSY14	1	rnr1D57N-Rep1	CCA	C>T	A/T+1	G/C-1	CG>TA	CG>TA	GAAACCCAACCTA	CAACCTA	GGT	CCA	C	A	C>T	C>T_CCA	CG>TA_CAACCTA	7	FALSE	FALSE
12_v.txt	32678	32678-SNV-C-T	SNV	1	C	T	66	26053	0.25333	56.0152	rnr1D57N	FALSE	CAN	JSY14	1	rnr1D57N-Rep1	TCC	C>T	A/T+1	G/C-1	CG>TA	CG>TA	GTTTCTCCAATAA	CCAATAA	AGG	TCC	C	A	C>T	C>T_TCC	CG>TA_CCAATAA	7	FALSE	FALSE
12_v.txt	32700	32700-SNV-C-T	SNV	1	C	T	26	26053	0.0997966	59.4231	rnr1D57N	FALSE	CAN	JSY14	1	rnr1D57N-Rep1	GCC	C>T	A/T+1	G/C-1	CG>TA	CG>TA	ACTGGGCCGGTAA	CCGGTAA	CGG	GCC	C	A	C>T	C>T_GCC	CG>TA_CCGGTAA	7	FALSE	FALSE
12_v.txt	32702	32702-SNV-G-A	SNV	1	G	A	22	26053	0.0844432	56.0909	rnr1D57N	FALSE	CAN	JSY14	1	rnr1D57N-Rep1	CGG	G>A	A/T+1	G/C-1	CG>TA	CG>TA	TGGGCCGGTAACC	GGTAACC	GCC	GCC	C	T	C>T	C>T_GCC	CG>TA_GGTAACC	7	FALSE	FALSE
12_v.txt	32749	32749-SNV-C-T	SNV	1	C	T	164	26053	0.629486	54.9573	rnr1D57N	FALSE	CAN	JSY14	1	rnr1D57N-Rep1	CCG	C>T	A/T+1	G/C-1	CG>TA	CG>TA	GAAACCCGATAAT	CGATAAT	GGC	CCG	C	A	C>T	C>T_CCG	CG>TA_CGATAAT	7	FALSE	FALSE
12_v.txt	32775	32775-SNV-G-A	SNV	1	G	A	95	26053	0.364641	51.2842	rnr1D57N	FALSE	CAN	JSY14	1	rnr1D57N-Rep1	AGC	G>A	A/T+1	G/C-1	CG>TA	CG>TA	ATGGAAGCGACCC	GCGACCC	TCG	TCG	C	T	C>T	C>T_TCG	CG>TA_GCGACCC	7	FALSE	FALSE
12_v.txt	32776	32776-SNV-C-T	SNV	1	C	T	23	26052	0.088285	55.4346	rnr1D57N	FALSE	CAN	JSY14	1	rnr1D57N-Rep1	GCG	C>T	A/T+1	G/C-1	CG>TA	CG>TA	TGGAAGCGACCCA	CGACCCA	CGC	GCG	C	A	C>T	C>T_GCG	CG>TA_CGACCCA	7	FALSE	FALSE
12_v.txt	32780	32780-SNV-C-T	SNV	1	C	T	63	26053	0.241815	44.2347	rnr1D57N	FALSE	CAN	JSY14	1	rnr1D57N-Rep1	CCC	C>T	A/T+1	G/C-1	CG>TA	CG>TA	AGCGACCCAGAAC	CCAGAAC	GGG	CCC	C	A	C>T	C>T_CCC	CG>TA_CCAGAAC	7	FALSE	FALSE
12_v.txt	32788	32788-SNV-C-T	SNV	1	C	T	18	26052	0.0690926	44.3889	rnr1D57N	FALSE	CAN	JSY14	1	rnr1D57N-Rep1	TCG	C>T	A/T+1	G/C-1	CG>TA	CG>TA	AGAACTCGAATTC	CGAATTC	AGC	TCG	C	A	C>T	C>T_TCG	CG>TA_CGAATTC	7	FALSE	FALSE
12_v.txt	32794	32794-SNV-C-T	SNV	1	C	T	25	26053	0.0959582	49	rnr1D57N	FALSE	CAN	JSY14	1	rnr1D57N-Rep1	TCA	C>T	A/T+1	G/C-1	CG>TA	CG>TA	CGAATTCACCGTA	CACCGTA	AGT	TCA	C	A	C>T	C>T_TCA	CG>TA_CACCGTA	7	FALSE	FALSE
12_v.txt	32797	32797-SNV-C-T	SNV	1	C	T	31	26053	0.118988	44.9032	rnr1D57N	FALSE	CAN	JSY14	1	rnr1D57N-Rep1	CCG	C>T	A/T+1	G/C-1	CG>TA	CG>TA	ATTCACCGTAATA	CGTAATA	GGC	CCG	C	A	C>T	C>T_CCG	CG>TA_CGTAATA	7	FALSE	FALSE
12_v.txt	32798	32798-SNV-G-A	SNV	1	G	A	32	26053	0.122827	45.0932	rnr1D57N	FALSE	CAN	JSY14	1	rnr1D57N-Rep1	CGT	G>A	A/T+1	G/C-1	CG>TA	CG>TA	TTCACCGTAATAT	GTAATAT	GCA	GCA	C	T	C>T	C>T_GCA	CG>TA_GTAATAT	7	FALSE	FALSE
12_v.txt	32841	32841-SNV-C-T	SNV	1	C	T	2209	26053	8.47887	42.806	rnr1D57N	FALSE	CAN	JSY14	1	rnr1D57N-Rep1	CCA	C>T	A/T+1	G/C-1	CG>TA	CG>TA	ATTACCCAAAAAA	CAAAAAA	GGT	CCA	C	A	C>T	C>T_CCA	CG>TA_CAAAAAA	7	FALSE	FALSE
12_v.txt	32855	32855-SNV-C-T	SNV	1	C	T	150	26052	0.575772	35.5	rnr1D57N	FALSE	CAN	JSY14	1	rnr1D57N-Rep1	TCC	C>T	A/T+1	G/C-1	CG>TA	CG>TA	ACTAATCCATGCC	CCATGCC	AGG	TCC	C	A	C>T	C>T_TCC	CG>TA_CCATGCC	7	FALSE	FALSE
12_v.txt	32860	32860-SNV-C-T	SNV	1	C	T	28	26051	0.107481	37.8214	rnr1D57N	FALSE	CAN	JSY14	1	rnr1D57N-Rep1	GCC	C>T	A/T+1	G/C-1	CG>TA	CG>TA	TCCATGCCGCCAG	CCGCCAG	CGG	GCC	C	A	C>T	C>T_GCC	CG>TA_CCGCCAG	7	FALSE	FALSE
12_v.txt	32883	32883-SNV-C-T	SNV	1	C	T	29	21315	0.136054	37.0684	rnr1D57N	FALSE	CAN	JSY14	1	rnr1D57N-Rep1	CCA	C>T	A/T+1	G/C-1	CG>TA	CG>TA	TACGTCCAAAATT	CAAAATT	GGT	CCA	C	A	C>T	C>T_CCA	CG>TA_CAAAATT	7	FALSE	FALSE
12_v.txt	32900	32900-SNV-G-A	SNV	1	G	A	22	21315	0.103214	35.7728	rnr1D57N	FALSE	CAN	JSY14	1	rnr1D57N-Rep1	GGC	G>A	A/T+1	G/C-1	CG>TA	CG>TA	GACTTGGCCAACT	GCCAACT	CCG	CCG	C	T	C>T	C>T_CCG	CG>TA_GCCAACT	7	FALSE	FALSE
12_v.txt	32901	32901-SNV-C-T	SNV	1	C	T	42	21315	0.197044	31.8097	rnr1D57N	FALSE	CAN	JSY14	1	rnr1D57N-Rep1	GCC	C>T	A/T+1	G/C-1	CG>TA	CG>TA	ACTTGGCCAACTA	CCAACTA	CGG	GCC	C	A	C>T	C>T_GCC	CG>TA_CCAACTA	7	FALSE	FALSE
12_v.txt	32917	32917-SNV-C-T	SNV	1	C	T	58	21315	0.272109	51.6724	rnr1D57N	FALSE	CAN	JSY14	1	rnr1D57N-Rep1	TCC	C>T	A/T+1	G/C-1	CG>TA	CG>TA	TAAGTTCCAGGGC	CCAGGGC	AGG	TCC	C	A	C>T	C>T_TCC	CG>TA_CCAGGGC	7	FALSE	FALSE
12_v.txt	32935	32935-SNV-C-T	SNV	1	C	T	29	21315	0.136054	50	rnr1D57N	FALSE	CAN	JSY14	1	rnr1D57N-Rep1	GCC	C>T	A/T+1	G/C-1	CG>TA	CG>TA	TGATTGCCCAAGA	CCCAAGA	CGG	GCC	C	A	C>T	C>T_GCC	CG>TA_CCCAAGA	7	FALSE	FALSE
12_v.txt	32945	32945-SNV-C-T	SNV	1	C	T	43	21315	0.201736	55.7907	rnr1D57N	FALSE	CAN	JSY14	1	rnr1D57N-Rep1	ACC	C>T	A/T+1	G/C-1	CG>TA	CG>TA	AGAAAACCAATAC	CCAATAC	TGG	ACC	C	A	C>T	C>T_ACC	CG>TA_CCAATAC	7	FALSE	FALSE
12_v.txt	32958	32958-SNV-C-T	SNV	1	C	T	29	21315	0.136054	50.2392	rnr1D57N	FALSE	CAN	JSY14	1	rnr1D57N-Rep1	ACC	C>T	A/T+1	G/C-1	CG>TA	CG>TA	ATGTAACCATTGG	CCATTGG	TGG	ACC	C	A	C>T	C>T_ACC	CG>TA_CCATTGG	7	FALSE	FALSE
12_v.txt	32959	32959-SNV-C-T	SNV	1	C	T	4	21315	0.0187661	40.7496	rnr1D57N	FALSE	CAN	JSY14	1	rnr1D57N-Rep1	CCA	C>T	A/T+1	G/C-1	CG>TA	CG>TA	TGTAACCATTGGC	CATTGGC	GGT	CCA	C	A	C>T	C>T_CCA	CG>TA_CATTGGC	7	FALSE	FALSE
12_v.txt	32965	32965-SNV-C-T	SNV	1	C	T	25	21315	0.117288	54.4	rnr1D57N	FALSE	CAN	JSY14	1	rnr1D57N-Rep1	GCC	C>T	A/T+1	G/C-1	CG>TA	CG>TA	CATTGGCCGCACC	CCGCACC	CGG	GCC	C	A	C>T	C>T_GCC	CG>TA_CCGCACC	7	FALSE	FALSE
12_v.txt	32967	32967-SNV-G-A	SNV	1	G	A	57	21315	0.267417	59.386	rnr1D57N	FALSE	CAN	JSY14	1	rnr1D57N-Rep1	CGC	G>A	A/T+1	G/C-1	CG>TA	CG>TA	TTGGCCGCACCAA	GCACCAA	GCG	GCG	C	T	C>T	C>T_GCG	CG>TA_GCACCAA	7	FALSE	FALSE
12_v.txt	32970	32970-SNV-C-T	SNV	1	C	T	27	21314	0.126677	58.5556	rnr1D57N	FALSE	CAN	JSY14	1	rnr1D57N-Rep1	ACC	C>T	A/T+1	G/C-1	CG>TA	CG>TA	GCCGCACCAAATG	CCAAATG	TGG	ACC	C	A	C>T	C>T_ACC	CG>TA_CCAAATG	7	FALSE	FALSE
12_v.txt	33015	33015-SNV-G-A	SNV	1	G	A	1888	21315	8.85761	61.0058	rnr1D57N	FALSE	CAN	JSY14	1	rnr1D57N-Rep1	GGA	G>A	A/T+1	G/C-1	CG>TA	CG>TA	AAAGAGGATGTAA	GATGTAA	CCT	CCT	C	T	C>T	C>T_CCT	CG>TA_GATGTAA	7	FALSE	FALSE
12_v.txt	33055	33055-SNV-G-A	SNV	1	G	A	59	21315	0.2768	55.3048	rnr1D57N	FALSE	CAN	JSY14	1	rnr1D57N-Rep1	TGC	G>A	A/T+1	G/C-1	CG>TA	CG>TA	AGGACTGCGTGAC	GCGTGAC	ACG	ACG	C	T	C>T	C>T_ACG	CG>TA_GCGTGAC	7	FALSE	FALSE
12_v.txt	33056	33056-SNV-C-T	SNV	1	C	T	33	21314	0.154828	52.9397	rnr1D57N	FALSE	CAN	JSY14	1	rnr1D57N-Rep1	GCG	C>T	A/T+1	G/C-1	CG>TA	CG>TA	GGACTGCGTGACA	CGTGACA	CGC	GCG	C	A	C>T	C>T_GCG	CG>TA_CGTGACA	7	FALSE	FALSE
12_v.txt	33069	33069-SNV-G-A	SNV	1	G	A	19	21315	0.0891391	47.9485	rnr1D57N	FALSE	CAN	JSY14	1	rnr1D57N-Rep1	TGC	G>A	A/T+1	G/C-1	CG>TA	CG>TA	GAATATGCCAAAG	GCCAAAG	ACG	ACG	C	T	C>T	C>T_ACG	CG>TA_GCCAAAG	7	FALSE	FALSE
12_v.txt	33070	33070-SNV-C-T	SNV	1	C	T	21	21315	0.0985222	59.3786	rnr1D57N	FALSE	CAN	JSY14	1	rnr1D57N-Rep1	GCC	C>T	A/T+1	G/C-1	CG>TA	CG>TA	AATATGCCAAAGA	CCAAAGA	CGG	GCC	C	A	C>T	C>T_GCC	CG>TA_CCAAAGA	7	FALSE	FALSE
12_v.txt	33075	33075-SNV-G-A	SNV	1	G	A	22	21315	0.103214	48.5455	rnr1D57N	FALSE	CAN	JSY14	1	rnr1D57N-Rep1	AGA	G>A	A/T+1	G/C-1	CG>TA	CG>TA	GCCAAAGAACCCA	GAACCCA	TCT	TCT	C	T	C>T	C>T_TCT	CG>TA_GAACCCA	7	FALSE	FALSE
12_v.txt	33114	33114-SNV-C-T	SNV	1	C	T	173	21315	0.811635	43.5721	rnr1D57N	FALSE	CAN	JSY14	1	rnr1D57N-Rep1	GCC	C>T	A/T+1	G/C-1	CG>TA	CG>TA	ACTGGGCCGGCGT	CCGGCGT	CGG	GCC	C	A	C>T	C>T_GCC	CG>TA_CCGGCGT	7	FALSE	FALSE
12_v.txt	33115	33115-SNV-C-T	SNV	1	C	T	137	21315	0.64274	44	rnr1D57N	FALSE	CAN	JSY14	1	rnr1D57N-Rep1	CCG	C>T	A/T+1	G/C-1	CG>TA	CG>TA	CTGGGCCGGCGTT	CGGCGTT	GGC	CCG	C	A	C>T	C>T_CCG	CG>TA_CGGCGTT	7	FALSE	FALSE
12_v.txt	33153	33153-SNV-C-T	SNV	1	C	T	56	21315	0.262726	36.5893	rnr1D57N	FALSE	CAN	JSY14	1	rnr1D57N-Rep1	ACC	C>T	A/T+1	G/C-1	CG>TA	CG>TA	AAAAGACCTGTAC	CCTGTAC	TGG	ACC	C	A	C>T	C>T_ACC	CG>TA_CCTGTAC	7	FALSE	FALSE
12_v.txt	33156	33156-SNV-G-A	SNV	1	G	A	504	21315	2.36453	37.3869	rnr1D57N	FALSE	CAN	JSY14	1	rnr1D57N-Rep1	TGT	G>A	A/T+1	G/C-1	CG>TA	CG>TA	AGACCTGTACCAA	GTACCAA	ACA	ACA	C	T	C>T	C>T_ACA	CG>TA_GTACCAA	7	FALSE	FALSE
12_v.txt	33159	33159-SNV-C-T	SNV	1	C	T	144	21315	0.675581	36.8316	rnr1D57N	FALSE	CAN	JSY14	1	rnr1D57N-Rep1	ACC	C>T	A/T+1	G/C-1	CG>TA	CG>TA	CCTGTACCAATAG	CCAATAG	TGG	ACC	C	A	C>T	C>T_ACC	CG>TA_CCAATAG	7	FALSE	FALSE
12_v.txt	33168	33168-SNV-C-T	SNV	1	C	T	59	21296	0.277047	37.7797	rnr1D57N	FALSE	CAN	JSY14	1	rnr1D57N-Rep1	ACC	C>T	A/T+1	G/C-1	CG>TA	CG>TA	ATAGTACCACCAA	CCACCAA	TGG	ACC	C	A	C>T	C>T_ACC	CG>TA_CCACCAA	7	FALSE	FALSE
12_v.txt	33177	33177-SNV-G-A	SNV	1	G	A	28	21290	0.131517	37.8214	rnr1D57N	FALSE	CAN	JSY14	1	rnr1D57N-Rep1	GGC	G>A	A/T+1	G/C-1	CG>TA	CG>TA	CCAAGGGCAATCA	GCAATCA	CCG	CCG	C	T	C>T	C>T_CCG	CG>TA_GCAATCA	7	FALSE	FALSE
12_v.txt	33199	33199-SNV-G-A	SNV	1	G	A	22	20300	0.108374	35.6364	rnr1D57N	FALSE	CAN	JSY14	1	rnr1D57N-Rep1	TGC	G>A	A/T+1	G/C-1	CG>TA	CG>TA	GTCTTTGCTTAAG	GCTTAAG	ACG	ACG	C	T	C>T	C>T_ACG	CG>TA_GCTTAAG	7	FALSE	FALSE
12_v.txt	33205	33205-SNV-G-A	SNV	1	G	A	11	20300	0.0541872	39.2709	rnr1D57N	FALSE	CAN	JSY14	1	rnr1D57N-Rep1	AGC	G>A	A/T+1	G/C-1	CG>TA	CG>TA	GCTTAAGCTCTCT	GCTCTCT	TCG	TCG	C	T	C>T	C>T_TCG	CG>TA_GCTCTCT	7	FALSE	FALSE
12_v.txt	33229	33229-SNV-G-A	SNV	1	G	A	121	20312	0.595707	39.0744	rnr1D57N	FALSE	CAN	JSY14	1	rnr1D57N-Rep1	TGT	G>A	A/T+1	G/C-1	CG>TA	CG>TA	CGTTCTGTACTTC	GTACTTC	ACA	ACA	C	T	C>T	C>T_ACA	CG>TA_GTACTTC	7	FALSE	FALSE
12_v.txt	33258	33258-SNV-C-T	SNV	1	C	T	34	20312	0.167389	43.7059	rnr1D57N	FALSE	CAN	JSY14	1	rnr1D57N-Rep1	GCC	C>T	A/T+1	G/C-1	CG>TA	CG>TA	CCTATGCCATCCT	CCATCCT	CGG	GCC	C	A	C>T	C>T_GCC	CG>TA_CCATCCT	7	FALSE	FALSE
12_v.txt	33276	33276-SNV-G-A	SNV	1	G	A	35	20312	0.172312	48.3429	rnr1D57N	FALSE	CAN	JSY14	1	rnr1D57N-Rep1	CGT	G>A	A/T+1	G/C-1	CG>TA	CG>TA	GAGAACGTATCCT	GTATCCT	GCA	GCA	C	T	C>T	C>T_GCA	CG>TA_GTATCCT	7	FALSE	FALSE
12_v.txt	33284	33284-SNV-G-A	SNV	1	G	A	32	20312	0.157542	44	rnr1D57N	FALSE	CAN	JSY14	1	rnr1D57N-Rep1	CGC	G>A	A/T+1	G/C-1	CG>TA	CG>TA	ATCCTCGCCATTT	GCCATTT	GCG	GCG	C	T	C>T	C>T_GCG	CG>TA_GCCATTT	7	FALSE	FALSE
12_v.txt	33309	33309-SNV-C-T	SNV	1	C	T	29	20312	0.142773	57.0656	rnr1D57N	FALSE	CAN	JSY14	1	rnr1D57N-Rep1	GCG	C>T	A/T+1	G/C-1	CG>TA	CG>TA	AAAGAGCGCAATG	CGCAATG	CGC	GCG	C	A	C>T	C>T_GCG	CG>TA_CGCAATG	7	FALSE	FALSE
12_v.txt	33310	33310-SNV-G-A	SNV	1	G	A	22	20307	0.108337	57.082	rnr1D57N	FALSE	CAN	JSY14	1	rnr1D57N-Rep1	CGC	G>A	A/T+1	G/C-1	CG>TA	CG>TA	AAGAGCGCAATGG	GCAATGG	GCG	GCG	C	T	C>T	C>T_GCG	CG>TA_GCAATGG	7	FALSE	FALSE
12_v.txt	33382	33382-SNV-C-T	SNV	1	C	T	20	20312	0.098464	56.95	rnr1D57N	FALSE	CAN	JSY14	1	rnr1D57N-Rep1	GCT	C>T	A/T+1	G/C-1	CG>TA	CG>TA	GTGAAGCTTCAAC	CTTCAAC	CGA	GCT	C	A	C>T	C>T_GCT	CG>TA_CTTCAAC	7	FALSE	FALSE
12_v.txt	33392	33392-SNV-G-A	SNV	1	G	A	26	20312	0.128003	48.0385	rnr1D57N	FALSE	CAN	JSY14	1	rnr1D57N-Rep1	CGT	G>A	A/T+1	G/C-1	CG>TA	CG>TA	AACGTCGTGAAAG	GTGAAAG	GCA	GCA	C	T	C>T	C>T_GCA	CG>TA_GTGAAAG	7	FALSE	FALSE
12_v.txt	33474	33474-SNV-C-T	SNV	1	C	T	25	20311	0.123086	34.9997	rnr1D57N	FALSE	CAN	JSY14	1	rnr1D57N-Rep1	GCC	C>T	A/T+1	G/C-1	CG>TA	CG>TA	GCTATGCCTTTTT	CCTTTTT	CGG	GCC	C	A	C>T	C>T_GCC	CG>TA_CCTTTTT	7	FALSE	FALSE
12_v.txt	31917	31917-SNV-G-C	SNV	1	G	C	10	11162	0.0895897	37.6	rnr1D57N	FALSE	CAN	JSY14	1	rnr1D57N-Rep1	AGC	G>C	G/C+1	G/C-1	CG>GC	CG>GC	GCAAAAGCCGTGA	GCCGTGA	TCG	TCG	C	G	C>G	C>G_TCG	CG>GC_GCCGTGA	7	FALSE	FALSE
12_v.txt	32064	32064-SNV-G-C	SNV	1	G	C	48	16625	0.288722	61.3542	rnr1D57N	FALSE	CAN	JSY14	1	rnr1D57N-Rep1	TGA	G>C	G/C+1	G/C-1	CG>GC	CG>GC	GAGATTGAGATAA	GAGATAA	ACT	ACT	C	G	C>G	C>G_ACT	CG>GC_GAGATAA	7	FALSE	FALSE
12_v.txt	32092	32092-SNV-C-G	SNV	1	C	G	2	16624	0.0120308	50.9983	rnr1D57N	FALSE	CAN	JSY14	1	rnr1D57N-Rep1	GCA	C>G	G/C+1	G/C-1	CG>GC	CG>GC	AGCCTGCAACACC	CAACACC	CGT	GCA	C	C	C>G	C>G_GCA	CG>GC_CAACACC	7	FALSE	FALSE
12_v.txt	32150	32150-SNV-C-G	SNV	1	C	G	1	16625	0.00602	38.0019	rnr1D57N	FALSE	CAN	JSY14	1	rnr1D57N-Rep1	CCA	C>G	G/C+1	G/C-1	CG>GC	CG>GC	TGTCTCCATGTAA	CATGTAA	GGT	CCA	C	C	C>G	C>G_CCA	CG>GC_CATGTAA	7	FALSE	FALSE
12_v.txt	32223	32223-SNV-G-C	SNV	1	G	C	6	16624	0.0360924	36.1667	rnr1D57N	FALSE	CAN	JSY14	1	rnr1D57N-Rep1	TGA	G>C	G/C+1	G/C-1	CG>GC	CG>GC	GTCCTTGACAGGA	GACAGGA	ACT	ACT	C	G	C>G	C>G_ACT	CG>GC_GACAGGA	7	FALSE	FALSE
12_v.txt	32272	32272-SNV-G-C	SNV	1	G	C	42	29226	0.143708	37.0476	rnr1D57N	FALSE	CAN	JSY14	1	rnr1D57N-Rep1	CGG	G>C	G/C+1	G/C-1	CG>GC	CG>GC	AAATACGGGAACC	GGGAACC	GCC	GCC	C	G	C>G	C>G_GCC	CG>GC_GGGAACC	7	FALSE	FALSE
12_v.txt	32278	32278-SNV-C-G	SNV	1	C	G	52	29226	0.177924	34.7115	rnr1D57N	FALSE	CAN	JSY14	1	rnr1D57N-Rep1	CCA	C>G	G/C+1	G/C-1	CG>GC	CG>GC	GGGAACCAACGTA	CAACGTA	GGT	CCA	C	C	C>G	C>G_CCA	CG>GC_CAACGTA	7	FALSE	FALSE
12_v.txt	32292	32292-SNV-G-C	SNV	1	G	C	7	29224	0.0239529	55.8556	rnr1D57N	FALSE	CAN	JSY14	1	rnr1D57N-Rep1	TGA	G>C	G/C+1	G/C-1	CG>GC	CG>GC	ATATTTGAATTTG	GAATTTG	ACT	ACT	C	G	C>G	C>G_ACT	CG>GC_GAATTTG	7	FALSE	FALSE
12_v.txt	32399	32399-SNV-G-C	SNV	1	G	C	17	29225	0.0581694	58.7647	rnr1D57N	FALSE	CAN	JSY14	1	rnr1D57N-Rep1	CGT	G>C	G/C+1	G/C-1	CG>GC	CG>GC	AGAAACGTAGGAA	GTAGGAA	GCA	GCA	C	G	C>G	C>G_GCA	CG>GC_GTAGGAA	7	FALSE	FALSE
12_v.txt	32432	32432-SNV-G-C	SNV	1	G	C	83	29225	0.284003	57.1566	rnr1D57N	FALSE	CAN	JSY14	1	rnr1D57N-Rep1	TGT	G>C	G/C+1	G/C-1	CG>GC	CG>GC	GTCATTGTATGGA	GTATGGA	ACA	ACA	C	G	C>G	C>G_ACA	CG>GC_GTATGGA	7	FALSE	FALSE
12_v.txt	32449	32449-SNV-C-G	SNV	1	C	G	18	29225	0.0615911	55.0556	rnr1D57N	FALSE	CAN	JSY14	1	rnr1D57N-Rep1	CCA	C>G	G/C+1	G/C-1	CG>GC	CG>GC	AAAGTCCAATGAA	CAATGAA	GGT	CCA	C	C	C>G	C>G_CCA	CG>GC_CAATGAA	7	FALSE	FALSE
12_v.txt	32471	32471-SNV-G-C	SNV	1	G	C	51	29225	0.174508	47.8235	rnr1D57N	FALSE	CAN	JSY14	1	rnr1D57N-Rep1	TGT	G>C	G/C+1	G/C-1	CG>GC	CG>GC	GCCAATGTAGAAG	GTAGAAG	ACA	ACA	C	G	C>G	C>G_ACA	CG>GC_GTAGAAG	7	FALSE	FALSE
12_v.txt	32487	32487-SNV-C-G	SNV	1	C	G	14	29225	0.0479042	47.7155	rnr1D57N	FALSE	CAN	JSY14	1	rnr1D57N-Rep1	ACG	C>G	G/C+1	G/C-1	CG>GC	CG>GC	AAGATACGGAAAA	CGGAAAA	TGC	ACG	C	C	C>G	C>G_ACG	CG>GC_CGGAAAA	7	FALSE	FALSE
12_v.txt	32536	32536-SNV-C-G	SNV	1	C	G	3	29225	0.0102652	29	rnr1D57N	FALSE	CAN	JSY14	1	rnr1D57N-Rep1	GCA	C>G	G/C+1	G/C-1	CG>GC	CG>GC	GGTTTGCAGCTTC	CAGCTTC	CGT	GCA	C	C	C>G	C>G_GCA	CG>GC_CAGCTTC	7	FALSE	FALSE
12_v.txt	32539	32539-SNV-C-G	SNV	1	C	G	22	29225	0.075278	37.6364	rnr1D57N	FALSE	CAN	JSY14	1	rnr1D57N-Rep1	GCT	C>G	G/C+1	G/C-1	CG>GC	CG>GC	TTGCAGCTTCACC	CTTCACC	CGA	GCT	C	C	C>G	C>G_GCT	CG>GC_CTTCACC	7	FALSE	FALSE
12_v.txt	32544	32544-SNV-C-G	SNV	1	C	G	8	29224	0.0273748	37.8749	rnr1D57N	FALSE	CAN	JSY14	1	rnr1D57N-Rep1	ACC	C>G	G/C+1	G/C-1	CG>GC	CG>GC	GCTTCACCAGCAG	CCAGCAG	TGG	ACC	C	C	C>G	C>G_ACC	CG>GC_CCAGCAG	7	FALSE	FALSE
12_v.txt	32557	32557-SNV-C-G	SNV	1	C	G	8	29207	0.0273907	37.9994	rnr1D57N	FALSE	CAN	JSY14	1	rnr1D57N-Rep1	CCA	C>G	G/C+1	G/C-1	CG>GC	CG>GC	TGATACCAACTAG	CAACTAG	GGT	CCA	C	C	C>G	C>G_CCA	CG>GC_CAACTAG	7	FALSE	FALSE
12_v.txt	32743	32743-SNV-G-C	SNV	1	G	C	31	26053	0.118988	54.2581	rnr1D57N	FALSE	CAN	JSY14	1	rnr1D57N-Rep1	AGA	G>C	G/C+1	G/C-1	CG>GC	CG>GC	ATATTAGAAACCC	GAAACCC	TCT	TCT	C	G	C>G	C>G_TCT	CG>GC_GAAACCC	7	FALSE	FALSE
12_v.txt	32758	32758-SNV-C-G	SNV	1	C	G	10	26053	0.0383833	49.4923	rnr1D57N	FALSE	CAN	JSY14	1	rnr1D57N-Rep1	GCT	C>G	G/C+1	G/C-1	CG>GC	CG>GC	TAATGGCTAAAAC	CTAAAAC	CGA	GCT	C	C	C>G	C>G_GCT	CG>GC_CTAAAAC	7	FALSE	FALSE
12_v.txt	32776	32776-SNV-C-G	SNV	1	C	G	48	26052	0.184247	47.7532	rnr1D57N	FALSE	CAN	JSY14	1	rnr1D57N-Rep1	GCG	C>G	G/C+1	G/C-1	CG>GC	CG>GC	TGGAAGCGACCCA	CGACCCA	CGC	GCG	C	C	C>G	C>G_GCG	CG>GC_CGACCCA	7	FALSE	FALSE
12_v.txt	32798	32798-SNV-G-C	SNV	1	G	C	4	26053	0.0153533	41.4994	rnr1D57N	FALSE	CAN	JSY14	1	rnr1D57N-Rep1	CGT	G>C	G/C+1	G/C-1	CG>GC	CG>GC	TTCACCGTAATAT	GTAATAT	GCA	GCA	C	G	C>G	C>G_GCA	CG>GC_GTAATAT	7	FALSE	FALSE
12_v.txt	32809	32809-SNV-C-G	SNV	1	C	G	19	26053	0.0729283	41.7895	rnr1D57N	FALSE	CAN	JSY14	1	rnr1D57N-Rep1	ACA	C>G	G/C+1	G/C-1	CG>GC	CG>GC	ATTTGACAGGGAA	CAGGGAA	TGT	ACA	C	C	C>G	C>G_ACA	CG>GC_CAGGGAA	7	FALSE	FALSE
12_v.txt	32811	32811-SNV-G-C	SNV	1	G	C	371	26053	1.42402	44.1132	rnr1D57N	FALSE	CAN	JSY14	1	rnr1D57N-Rep1	AGG	G>C	G/C+1	G/C-1	CG>GC	CG>GC	TTGACAGGGAACA	GGGAACA	TCC	TCC	C	G	C>G	C>G_TCC	CG>GC_GGGAACA	7	FALSE	FALSE
12_v.txt	32876	32876-SNV-G-C	SNV	1	G	C	8	21306	0.0375481	34.5	rnr1D57N	FALSE	CAN	JSY14	1	rnr1D57N-Rep1	TGT	G>C	G/C+1	G/C-1	CG>GC	CG>GC	AACTTTGTACGTC	GTACGTC	ACA	ACA	C	G	C>G	C>G_ACA	CG>GC_GTACGTC	7	FALSE	FALSE
12_v.txt	32914	32914-SNV-G-C	SNV	1	G	C	1	21315	0.00469	16.0012	rnr1D57N	FALSE	CAN	JSY14	1	rnr1D57N-Rep1	AGT	G>C	G/C+1	G/C-1	CG>GC	CG>GC	CACTAAGTTCCAG	GTTCCAG	TCA	TCA	C	G	C>G	C>G_TCA	CG>GC_GTTCCAG	7	FALSE	FALSE
12_v.txt	32937	32937-SNV-C-G	SNV	1	C	G	16	21315	0.0750645	55.6146	rnr1D57N	FALSE	CAN	JSY14	1	rnr1D57N-Rep1	CCA	C>G	G/C+1	G/C-1	CG>GC	CG>GC	ATTGCCCAAGAAA	CAAGAAA	GGT	CCA	C	C	C>G	C>G_CCA	CG>GC_CAAGAAA	7	FALSE	FALSE
12_v.txt	32959	32959-SNV-C-G	SNV	1	C	G	32	21315	0.150129	60.9961	rnr1D57N	FALSE	CAN	JSY14	1	rnr1D57N-Rep1	CCA	C>G	G/C+1	G/C-1	CG>GC	CG>GC	TGTAACCATTGGC	CATTGGC	GGT	CCA	C	C	C>G	C>G_CCA	CG>GC_CATTGGC	7	FALSE	FALSE
12_v.txt	32970	32970-SNV-C-G	SNV	1	C	G	2	21314	0.00938	63	rnr1D57N	FALSE	CAN	JSY14	1	rnr1D57N-Rep1	ACC	C>G	G/C+1	G/C-1	CG>GC	CG>GC	GCCGCACCAAATG	CCAAATG	TGG	ACC	C	C	C>G	C>G_ACC	CG>GC_CCAAATG	7	FALSE	FALSE
12_v.txt	32971	32971-SNV-C-G	SNV	1	C	G	10	21315	0.0469153	57.5901	rnr1D57N	FALSE	CAN	JSY14	1	rnr1D57N-Rep1	CCA	C>G	G/C+1	G/C-1	CG>GC	CG>GC	CCGCACCAAATGC	CAAATGC	GGT	CCA	C	C	C>G	C>G_CCA	CG>GC_CAAATGC	7	FALSE	FALSE
12_v.txt	32977	32977-SNV-C-G	SNV	1	C	G	9	21315	0.0422238	62.3333	rnr1D57N	FALSE	CAN	JSY14	1	rnr1D57N-Rep1	GCT	C>G	G/C+1	G/C-1	CG>GC	CG>GC	CAAATGCTGGAGA	CTGGAGA	CGA	GCT	C	C	C>G	C>G_GCT	CG>GC_CTGGAGA	7	FALSE	FALSE
12_v.txt	32997	32997-SNV-G-C	SNV	1	G	C	236	21315	1.1072	61	rnr1D57N	FALSE	CAN	JSY14	1	rnr1D57N-Rep1	TGA	G>C	G/C+1	G/C-1	CG>GC	CG>GC	CTTTGTGAGAAAA	GAGAAAA	ACT	ACT	C	G	C>G	C>G_ACT	CG>GC_GAGAAAA	7	FALSE	FALSE
12_v.txt	33018	33018-SNV-G-C	SNV	1	G	C	16	21315	0.0750645	62.6875	rnr1D57N	FALSE	CAN	JSY14	1	rnr1D57N-Rep1	TGT	G>C	G/C+1	G/C-1	CG>GC	CG>GC	GAGGATGTAACAG	GTAACAG	ACA	ACA	C	G	C>G	C>G_ACA	CG>GC_GTAACAG	7	FALSE	FALSE
12_v.txt	33037	33037-SNV-C-G	SNV	1	C	G	12	21315	0.0562984	59.0833	rnr1D57N	FALSE	CAN	JSY14	1	rnr1D57N-Rep1	GCC	C>G	G/C+1	G/C-1	CG>GC	CG>GC	ATGTAGCCATTTC	CCATTTC	CGG	GCC	C	C	C>G	C>G_GCC	CG>GC_CCATTTC	7	FALSE	FALSE
12_v.txt	33069	33069-SNV-G-C	SNV	1	G	C	6	21315	0.0281492	55.1678	rnr1D57N	FALSE	CAN	JSY14	1	rnr1D57N-Rep1	TGC	G>C	G/C+1	G/C-1	CG>GC	CG>GC	GAATATGCCAAAG	GCCAAAG	ACG	ACG	C	G	C>G	C>G_ACG	CG>GC_GCCAAAG	7	FALSE	FALSE
12_v.txt	33070	33070-SNV-C-G	SNV	1	C	G	41	21315	0.192353	54.5834	rnr1D57N	FALSE	CAN	JSY14	1	rnr1D57N-Rep1	GCC	C>G	G/C+1	G/C-1	CG>GC	CG>GC	AATATGCCAAAGA	CCAAAGA	CGG	GCC	C	C	C>G	C>G_GCC	CG>GC_CCAAAGA	7	FALSE	FALSE
12_v.txt	33115	33115-SNV-C-G	SNV	1	C	G	17	21315	0.079756	37.1765	rnr1D57N	FALSE	CAN	JSY14	1	rnr1D57N-Rep1	CCG	C>G	G/C+1	G/C-1	CG>GC	CG>GC	CTGGGCCGGCGTT	CGGCGTT	GGC	CCG	C	C	C>G	C>G_CCG	CG>GC_CGGCGTT	7	FALSE	FALSE
12_v.txt	33154	33154-SNV-C-G	SNV	1	C	G	15	21315	0.070373	37.9333	rnr1D57N	FALSE	CAN	JSY14	1	rnr1D57N-Rep1	CCT	C>G	G/C+1	G/C-1	CG>GC	CG>GC	AAAGACCTGTACC	CTGTACC	GGA	CCT	C	C	C>G	C>G_CCT	CG>GC_CTGTACC	7	FALSE	FALSE
12_v.txt	33205	33205-SNV-G-C	SNV	1	G	C	8	20300	0.0394089	41.6215	rnr1D57N	FALSE	CAN	JSY14	1	rnr1D57N-Rep1	AGC	G>C	G/C+1	G/C-1	CG>GC	CG>GC	GCTTAAGCTCTCT	GCTCTCT	TCG	TCG	C	G	C>G	C>G_TCG	CG>GC_GCTCTCT	7	FALSE	FALSE
12_v.txt	33310	33310-SNV-G-C	SNV	1	G	C	3	20307	0.0147732	20.3327	rnr1D57N	FALSE	CAN	JSY14	1	rnr1D57N-Rep1	CGC	G>C	G/C+1	G/C-1	CG>GC	CG>GC	AAGAGCGCAATGG	GCAATGG	GCG	GCG	C	G	C>G	C>G_GCG	CG>GC_GCAATGG	7	FALSE	FALSE
12_v.txt	33378	33378-SNV-G-C	SNV	1	G	C	3	20312	0.0147696	64	rnr1D57N	FALSE	CAN	JSY14	1	rnr1D57N-Rep1	TGA	G>C	G/C+1	G/C-1	CG>GC	CG>GC	GTTTGTGAAGCTT	GAAGCTT	ACT	ACT	C	G	C>G	C>G_ACT	CG>GC_GAAGCTT	7	FALSE	FALSE
12_v.txt	33456	33456-SNV-G-C	SNV	1	G	C	49	20312	0.241237	43.2245	rnr1D57N	FALSE	CAN	JSY14	1	rnr1D57N-Rep1	TGA	G>C	G/C+1	G/C-1	CG>GC	CG>GC	TCTTTTGAATTTG	GAATTTG	ACT	ACT	C	G	C>G	C>G_ACT	CG>GC_GAATTTG	7	FALSE	FALSE
12_v.txt	31657	31657-SNV-G-T	SNV	1	G	T	96	11167	0.859676	18.0417	rnr1D57N	FALSE	CAN	JSY14	1	rnr1D57N-Rep1	GGC	G>T	A/T+1	G/C-1	CG>AT	CG>AT	GAAATGGCGTGGA	GCGTGGA	CCG	CCG	C	A	C>A	C>A_CCG	CG>AT_GCGTGGA	7	FALSE	FALSE
12_v.txt	31869	31869-SNV-G-T	SNV	1	G	T	29	11167	0.259694	43.7586	rnr1D57N	FALSE	CAN	JSY14	1	rnr1D57N-Rep1	AGA	G>T	A/T+1	G/C-1	CG>AT	CG>AT	AAAATAGAGATAT	GAGATAT	TCT	TCT	C	A	C>A	C>A_TCT	CG>AT_GAGATAT	7	FALSE	FALSE
12_v.txt	32088	32088-SNV-C-A	SNV	1	C	A	5	16625	0.0300752	53.8027	rnr1D57N	FALSE	CAN	JSY14	1	rnr1D57N-Rep1	GCC	C>A	A/T+1	G/C-1	CG>AT	CG>AT	AAAAAGCCTGCAA	CCTGCAA	CGG	GCC	C	T	C>A	C>A_GCC	CG>AT_CCTGCAA	7	FALSE	FALSE
12_v.txt	32095	32095-SNV-C-A	SNV	1	C	A	46	16625	0.276692	61.9565	rnr1D57N	FALSE	CAN	JSY14	1	rnr1D57N-Rep1	ACA	C>A	A/T+1	G/C-1	CG>AT	CG>AT	CTGCAACACCAGT	CACCAGT	TGT	ACA	C	T	C>A	C>A_ACA	CG>AT_CACCAGT	7	FALSE	FALSE
12_v.txt	32102	32102-SNV-G-T	SNV	1	G	T	2	16625	0.0120301	63.9995	rnr1D57N	FALSE	CAN	JSY14	1	rnr1D57N-Rep1	TGA	G>T	A/T+1	G/C-1	CG>AT	CG>AT	ACCAGTGATATTT	GATATTT	ACT	ACT	C	A	C>A	C>A_ACT	CG>AT_GATATTT	7	FALSE	FALSE
12_v.txt	32114	32114-SNV-C-A	SNV	1	C	A	3	16625	0.0180451	37.6666	rnr1D57N	FALSE	CAN	JSY14	1	rnr1D57N-Rep1	GCC	C>A	A/T+1	G/C-1	CG>AT	CG>AT	TAATAGCCATTCG	CCATTCG	CGG	GCC	C	T	C>A	C>A_GCC	CG>AT_CCATTCG	7	FALSE	FALSE
12_v.txt	32119	32119-SNV-C-A	SNV	1	C	A	69	16625	0.415038	57.8287	rnr1D57N	FALSE	CAN	JSY14	1	rnr1D57N-Rep1	TCG	C>A	A/T+1	G/C-1	CG>AT	CG>AT	GCCATTCGAAAAC	CGAAAAC	AGC	TCG	C	T	C>A	C>A_TCG	CG>AT_CGAAAAC	7	FALSE	FALSE
12_v.txt	32120	32120-SNV-G-T	SNV	1	G	T	4	16625	0.0240601	50.7482	rnr1D57N	FALSE	CAN	JSY14	1	rnr1D57N-Rep1	CGA	G>T	A/T+1	G/C-1	CG>AT	CG>AT	CCATTCGAAAACT	GAAAACT	GCT	GCT	C	A	C>A	C>A_GCT	CG>AT_GAAAACT	7	FALSE	FALSE
12_v.txt	32149	32149-SNV-C-A	SNV	1	C	A	15	16625	0.0902256	48.5997	rnr1D57N	FALSE	CAN	JSY14	1	rnr1D57N-Rep1	TCC	C>A	A/T+1	G/C-1	CG>AT	CG>AT	ATGTCTCCATGTA	CCATGTA	AGG	TCC	C	T	C>A	C>A_TCC	CG>AT_CCATGTA	7	FALSE	FALSE
12_v.txt	32150	32150-SNV-C-A	SNV	1	C	A	17	16625	0.102256	41.4132	rnr1D57N	FALSE	CAN	JSY14	1	rnr1D57N-Rep1	CCA	C>A	A/T+1	G/C-1	CG>AT	CG>AT	TGTCTCCATGTAA	CATGTAA	GGT	CCA	C	T	C>A	C>A_CCA	CG>AT_CATGTAA	7	FALSE	FALSE
12_v.txt	32153	32153-SNV-G-T	SNV	1	G	T	13	16625	0.0781955	53.6156	rnr1D57N	FALSE	CAN	JSY14	1	rnr1D57N-Rep1	TGT	G>T	A/T+1	G/C-1	CG>AT	CG>AT	CTCCATGTAAGCC	GTAAGCC	ACA	ACA	C	A	C>A	C>A_ACA	CG>AT_GTAAGCC	7	FALSE	FALSE
12_v.txt	32195	32195-SNV-G-T	SNV	1	G	T	22	16625	0.132331	43.6364	rnr1D57N	FALSE	CAN	JSY14	1	rnr1D57N-Rep1	TGT	G>T	A/T+1	G/C-1	CG>AT	CG>AT	TGCAATGTATGGA	GTATGGA	ACA	ACA	C	A	C>A	C>A_ACA	CG>AT_GTATGGA	7	FALSE	FALSE
12_v.txt	32272	32272-SNV-G-T	SNV	1	G	T	49	29226	0.167659	34.2859	rnr1D57N	FALSE	CAN	JSY14	1	rnr1D57N-Rep1	CGG	G>T	A/T+1	G/C-1	CG>AT	CG>AT	AAATACGGGAACC	GGGAACC	GCC	GCC	C	A	C>A	C>A_GCC	CG>AT_GGGAACC	7	FALSE	FALSE
12_v.txt	32274	32274-SNV-G-T	SNV	1	G	T	342	29226	1.17019	36.0708	rnr1D57N	FALSE	CAN	JSY14	1	rnr1D57N-Rep1	GGA	G>T	A/T+1	G/C-1	CG>AT	CG>AT	ATACGGGAACCAA	GAACCAA	CCT	CCT	C	A	C>A	C>A_CCT	CG>AT_GAACCAA	7	FALSE	FALSE
12_v.txt	32292	32292-SNV-G-T	SNV	1	G	T	39	29224	0.133452	51.1793	rnr1D57N	FALSE	CAN	JSY14	1	rnr1D57N-Rep1	TGA	G>T	A/T+1	G/C-1	CG>AT	CG>AT	ATATTTGAATTTG	GAATTTG	ACT	ACT	C	A	C>A	C>A_ACT	CG>AT_GAATTTG	7	FALSE	FALSE
12_v.txt	32301	32301-SNV-G-T	SNV	1	G	T	23	29225	0.0786997	43.6522	rnr1D57N	FALSE	CAN	JSY14	1	rnr1D57N-Rep1	GGC	G>T	A/T+1	G/C-1	CG>AT	CG>AT	TTTGCGGCAGAAA	GCAGAAA	CCG	CCG	C	A	C>A	C>A_CCG	CG>AT_GCAGAAA	7	FALSE	FALSE
12_v.txt	32368	32368-SNV-C-A	SNV	1	C	A	48	29225	0.164243	58.25	rnr1D57N	FALSE	CAN	JSY14	1	rnr1D57N-Rep1	TCA	C>A	A/T+1	G/C-1	CG>AT	CG>AT	AGTTCTCAATAGC	CAATAGC	AGT	TCA	C	T	C>A	C>A_TCA	CG>AT_CAATAGC	7	FALSE	FALSE
12_v.txt	32373	32373-SNV-G-T	SNV	1	G	T	26	29225	0.0889649	56.7308	rnr1D57N	FALSE	CAN	JSY14	1	rnr1D57N-Rep1	AGC	G>T	A/T+1	G/C-1	CG>AT	CG>AT	TCAATAGCAATAA	GCAATAA	TCG	TCG	C	A	C>A	C>A_TCG	CG>AT_GCAATAA	7	FALSE	FALSE
12_v.txt	32399	32399-SNV-G-T	SNV	1	G	T	151	29225	0.516681	57.5298	rnr1D57N	FALSE	CAN	JSY14	1	rnr1D57N-Rep1	CGT	G>T	A/T+1	G/C-1	CG>AT	CG>AT	AGAAACGTAGGAA	GTAGGAA	GCA	GCA	C	A	C>A	C>A_GCA	CG>AT_GTAGGAA	7	FALSE	FALSE
12_v.txt	32432	32432-SNV-G-T	SNV	1	G	T	34	29225	0.116339	58.0588	rnr1D57N	FALSE	CAN	JSY14	1	rnr1D57N-Rep1	TGT	G>T	A/T+1	G/C-1	CG>AT	CG>AT	GTCATTGTATGGA	GTATGGA	ACA	ACA	C	A	C>A	C>A_ACA	CG>AT_GTATGGA	7	FALSE	FALSE
12_v.txt	32449	32449-SNV-C-A	SNV	1	C	A	30	29225	0.102652	51.4	rnr1D57N	FALSE	CAN	JSY14	1	rnr1D57N-Rep1	CCA	C>A	A/T+1	G/C-1	CG>AT	CG>AT	AAAGTCCAATGAA	CAATGAA	GGT	CCA	C	T	C>A	C>A_CCA	CG>AT_CAATGAA	7	FALSE	FALSE
12_v.txt	32463	32463-SNV-G-T	SNV	1	G	T	23	29225	0.0786997	46.1739	rnr1D57N	FALSE	CAN	JSY14	1	rnr1D57N-Rep1	AGA	G>T	A/T+1	G/C-1	CG>AT	CG>AT	AATAGAGAGCCAA	GAGCCAA	TCT	TCT	C	A	C>A	C>A_TCT	CG>AT_GAGCCAA	7	FALSE	FALSE
12_v.txt	32471	32471-SNV-G-T	SNV	1	G	T	70	29225	0.239521	46.9714	rnr1D57N	FALSE	CAN	JSY14	1	rnr1D57N-Rep1	TGT	G>T	A/T+1	G/C-1	CG>AT	CG>AT	GCCAATGTAGAAG	GTAGAAG	ACA	ACA	C	A	C>A	C>A_ACA	CG>AT_GTAGAAG	7	FALSE	FALSE
12_v.txt	32494	32494-SNV-C-A	SNV	1	C	A	267	29224	0.913633	47.5241	rnr1D57N	FALSE	CAN	JSY14	1	rnr1D57N-Rep1	ACA	C>A	A/T+1	G/C-1	CG>AT	CG>AT	GGAAAACAACTTT	CAACTTT	TGT	ACA	C	T	C>A	C>A_ACA	CG>AT_CAACTTT	7	FALSE	FALSE
12_v.txt	32508	32508-SNV-G-T	SNV	1	G	T	104	29225	0.35586	43.5769	rnr1D57N	FALSE	CAN	JSY14	1	rnr1D57N-Rep1	GGC	G>T	A/T+1	G/C-1	CG>AT	CG>AT	TTGATGGCTCTTG	GCTCTTG	CCG	CCG	C	A	C>A	C>A_CCG	CG>AT_GCTCTTG	7	FALSE	FALSE
12_v.txt	32536	32536-SNV-C-A	SNV	1	C	A	9	29225	0.0307956	30.5556	rnr1D57N	FALSE	CAN	JSY14	1	rnr1D57N-Rep1	GCA	C>A	A/T+1	G/C-1	CG>AT	CG>AT	GGTTTGCAGCTTC	CAGCTTC	CGT	GCA	C	T	C>A	C>A_GCA	CG>AT_CAGCTTC	7	FALSE	FALSE
12_v.txt	32542	32542-SNV-C-A	SNV	1	C	A	25	29225	0.0855432	35.96	rnr1D57N	FALSE	CAN	JSY14	1	rnr1D57N-Rep1	TCA	C>A	A/T+1	G/C-1	CG>AT	CG>AT	CAGCTTCACCAGC	CACCAGC	AGT	TCA	C	T	C>A	C>A_TCA	CG>AT_CACCAGC	7	FALSE	FALSE
12_v.txt	32545	32545-SNV-C-A	SNV	1	C	A	53	29224	0.181358	36.8245	rnr1D57N	FALSE	CAN	JSY14	1	rnr1D57N-Rep1	CCA	C>A	A/T+1	G/C-1	CG>AT	CG>AT	CTTCACCAGCAGT	CAGCAGT	GGT	CCA	C	T	C>A	C>A_CCA	CG>AT_CAGCAGT	7	FALSE	FALSE
12_v.txt	32556	32556-SNV-C-A	SNV	1	C	A	20	29210	0.0684697	35.25	rnr1D57N	FALSE	CAN	JSY14	1	rnr1D57N-Rep1	ACC	C>A	A/T+1	G/C-1	CG>AT	CG>AT	GTGATACCAACTA	CCAACTA	TGG	ACC	C	T	C>A	C>A_ACC	CG>AT_CCAACTA	7	FALSE	FALSE
12_v.txt	32566	32566-SNV-C-A	SNV	1	C	A	47	26044	0.180464	37.4894	rnr1D57N	FALSE	CAN	JSY14	1	rnr1D57N-Rep1	TCA	C>A	A/T+1	G/C-1	CG>AT	CG>AT	CTAGTTCAGTACC	CAGTACC	AGT	TCA	C	T	C>A	C>A_TCA	CG>AT_CAGTACC	7	FALSE	FALSE
12_v.txt	32575	32575-SNV-G-T	SNV	1	G	T	38	26053	0.145857	35.3106	rnr1D57N	FALSE	CAN	JSY14	1	rnr1D57N-Rep1	TGA	G>T	A/T+1	G/C-1	CG>AT	CG>AT	TACCTTGAAATGT	GAAATGT	ACT	ACT	C	A	C>A	C>A_ACT	CG>AT_GAAATGT	7	FALSE	FALSE
12_v.txt	32580	32580-SNV-G-T	SNV	1	G	T	26	26053	0.0997966	36.5726	rnr1D57N	FALSE	CAN	JSY14	1	rnr1D57N-Rep1	TGT	G>T	A/T+1	G/C-1	CG>AT	CG>AT	TGAAATGTGAAGG	GTGAAGG	ACA	ACA	C	A	C>A	C>A_ACA	CG>AT_GTGAAGG	7	FALSE	FALSE
12_v.txt	32629	32629-SNV-C-A	SNV	1	C	A	428	26053	1.64281	55.6963	rnr1D57N	FALSE	CAN	JSY14	1	rnr1D57N-Rep1	TCG	C>A	A/T+1	G/C-1	CG>AT	CG>AT	TCCCTTCGTTTTT	CGTTTTT	AGC	TCG	C	T	C>A	C>A_TCG	CG>AT_CGTTTTT	7	FALSE	FALSE
12_v.txt	32658	32658-SNV-C-A	SNV	1	C	A	18	26053	0.0690899	25.7809	rnr1D57N	FALSE	CAN	JSY14	1	rnr1D57N-Rep1	ACC	C>A	A/T+1	G/C-1	CG>AT	CG>AT	CCTGGACCCCAGG	CCCCAGG	TGG	ACC	C	T	C>A	C>A_ACC	CG>AT_CCCCAGG	7	FALSE	FALSE
12_v.txt	32678	32678-SNV-C-A	SNV	1	C	A	13	26053	0.0498983	25.4615	rnr1D57N	FALSE	CAN	JSY14	1	rnr1D57N-Rep1	TCC	C>A	A/T+1	G/C-1	CG>AT	CG>AT	GTTTCTCCAATAA	CCAATAA	AGG	TCC	C	T	C>A	C>A_TCC	CG>AT_CCAATAA	7	FALSE	FALSE
12_v.txt	32692	32692-SNV-C-A	SNV	1	C	A	63	26053	0.241815	57.8571	rnr1D57N	FALSE	CAN	JSY14	1	rnr1D57N-Rep1	CCA	C>A	A/T+1	G/C-1	CG>AT	CG>AT	GGAATCCAACTGG	CAACTGG	GGT	CCA	C	T	C>A	C>A_CCA	CG>AT_CAACTGG	7	FALSE	FALSE
12_v.txt	32733	32733-SNV-C-A	SNV	1	C	A	311	26053	1.19372	59.6607	rnr1D57N	FALSE	CAN	JSY14	1	rnr1D57N-Rep1	ACA	C>A	A/T+1	G/C-1	CG>AT	CG>AT	CAAAAACAGTATA	CAGTATA	TGT	ACA	C	T	C>A	C>A_ACA	CG>AT_CAGTATA	7	FALSE	FALSE
12_v.txt	32735	32735-SNV-G-T	SNV	1	G	T	30	26053	0.11515	56.3983	rnr1D57N	FALSE	CAN	JSY14	1	rnr1D57N-Rep1	AGT	G>T	A/T+1	G/C-1	CG>AT	CG>AT	AAAACAGTATATT	GTATATT	TCA	TCA	C	A	C>A	C>A_TCA	CG>AT_GTATATT	7	FALSE	FALSE
12_v.txt	32780	32780-SNV-C-A	SNV	1	C	A	10	26053	0.0383833	30.8884	rnr1D57N	FALSE	CAN	JSY14	1	rnr1D57N-Rep1	CCC	C>A	A/T+1	G/C-1	CG>AT	CG>AT	AGCGACCCAGAAC	CCAGAAC	GGG	CCC	C	T	C>A	C>A_CCC	CG>AT_CCAGAAC	7	FALSE	FALSE
12_v.txt	32788	32788-SNV-C-A	SNV	1	C	A	76	26052	0.291724	48.0526	rnr1D57N	FALSE	CAN	JSY14	1	rnr1D57N-Rep1	TCG	C>A	A/T+1	G/C-1	CG>AT	CG>AT	AGAACTCGAATTC	CGAATTC	AGC	TCG	C	T	C>A	C>A_TCG	CG>AT_CGAATTC	7	FALSE	FALSE
12_v.txt	32794	32794-SNV-C-A	SNV	1	C	A	58	26053	0.222623	41.9828	rnr1D57N	FALSE	CAN	JSY14	1	rnr1D57N-Rep1	TCA	C>A	A/T+1	G/C-1	CG>AT	CG>AT	CGAATTCACCGTA	CACCGTA	AGT	TCA	C	T	C>A	C>A_TCA	CG>AT_CACCGTA	7	FALSE	FALSE
12_v.txt	32797	32797-SNV-C-A	SNV	1	C	A	5	26053	0.0191916	43	rnr1D57N	FALSE	CAN	JSY14	1	rnr1D57N-Rep1	CCG	C>A	A/T+1	G/C-1	CG>AT	CG>AT	ATTCACCGTAATA	CGTAATA	GGC	CCG	C	T	C>A	C>A_CCG	CG>AT_CGTAATA	7	FALSE	FALSE
12_v.txt	32809	32809-SNV-C-A	SNV	1	C	A	14	26053	0.0537366	37.4286	rnr1D57N	FALSE	CAN	JSY14	1	rnr1D57N-Rep1	ACA	C>A	A/T+1	G/C-1	CG>AT	CG>AT	ATTTGACAGGGAA	CAGGGAA	TGT	ACA	C	T	C>A	C>A_ACA	CG>AT_CAGGGAA	7	FALSE	FALSE
12_v.txt	32819	32819-SNV-G-T	SNV	1	G	T	17	26053	0.0652516	37.0588	rnr1D57N	FALSE	CAN	JSY14	1	rnr1D57N-Rep1	AGT	G>T	A/T+1	G/C-1	CG>AT	CG>AT	GAACAAGTTCATT	GTTCATT	TCA	TCA	C	A	C>A	C>A_TCA	CG>AT_GTTCATT	7	FALSE	FALSE
12_v.txt	32841	32841-SNV-C-A	SNV	1	C	A	6	26053	0.02303	46.663	rnr1D57N	FALSE	CAN	JSY14	1	rnr1D57N-Rep1	CCA	C>A	A/T+1	G/C-1	CG>AT	CG>AT	ATTACCCAAAAAA	CAAAAAA	GGT	CCA	C	T	C>A	C>A_CCA	CG>AT_CAAAAAA	7	FALSE	FALSE
12_v.txt	32876	32876-SNV-G-T	SNV	1	G	T	98	21306	0.459964	35.6531	rnr1D57N	FALSE	CAN	JSY14	1	rnr1D57N-Rep1	TGT	G>T	A/T+1	G/C-1	CG>AT	CG>AT	AACTTTGTACGTC	GTACGTC	ACA	ACA	C	A	C>A	C>A_ACA	CG>AT_GTACGTC	7	FALSE	FALSE
12_v.txt	32900	32900-SNV-G-T	SNV	1	G	T	17	21315	0.079756	19.943	rnr1D57N	FALSE	CAN	JSY14	1	rnr1D57N-Rep1	GGC	G>T	A/T+1	G/C-1	CG>AT	CG>AT	GACTTGGCCAACT	GCCAACT	CCG	CCG	C	A	C>A	C>A_CCG	CG>AT_GCCAACT	7	FALSE	FALSE
12_v.txt	32901	32901-SNV-C-A	SNV	1	C	A	6	21315	0.0281492	38	rnr1D57N	FALSE	CAN	JSY14	1	rnr1D57N-Rep1	GCC	C>A	A/T+1	G/C-1	CG>AT	CG>AT	ACTTGGCCAACTA	CCAACTA	CGG	GCC	C	T	C>A	C>A_GCC	CG>AT_CCAACTA	7	FALSE	FALSE
12_v.txt	32902	32902-SNV-C-A	SNV	1	C	A	3	21315	0.0140746	20.6668	rnr1D57N	FALSE	CAN	JSY14	1	rnr1D57N-Rep1	CCA	C>A	A/T+1	G/C-1	CG>AT	CG>AT	CTTGGCCAACTAC	CAACTAC	GGT	CCA	C	T	C>A	C>A_CCA	CG>AT_CAACTAC	7	FALSE	FALSE
12_v.txt	32908	32908-SNV-C-A	SNV	1	C	A	46	21315	0.21581	48	rnr1D57N	FALSE	CAN	JSY14	1	rnr1D57N-Rep1	ACA	C>A	A/T+1	G/C-1	CG>AT	CG>AT	CAACTACACTAAG	CACTAAG	TGT	ACA	C	T	C>A	C>A_ACA	CG>AT_CACTAAG	7	FALSE	FALSE
12_v.txt	32917	32917-SNV-C-A	SNV	1	C	A	93	21315	0.436312	51.7419	rnr1D57N	FALSE	CAN	JSY14	1	rnr1D57N-Rep1	TCC	C>A	A/T+1	G/C-1	CG>AT	CG>AT	TAAGTTCCAGGGC	CCAGGGC	AGG	TCC	C	T	C>A	C>A_TCC	CG>AT_CCAGGGC	7	FALSE	FALSE
12_v.txt	32928	32928-SNV-G-T	SNV	1	G	T	25	21315	0.117288	60.28	rnr1D57N	FALSE	CAN	JSY14	1	rnr1D57N-Rep1	AGT	G>T	A/T+1	G/C-1	CG>AT	CG>AT	GCAAAAGTGATTG	GTGATTG	TCA	TCA	C	A	C>A	C>A_TCA	CG>AT_GTGATTG	7	FALSE	FALSE
12_v.txt	32934	32934-SNV-G-T	SNV	1	G	T	438	21315	2.05489	52.1064	rnr1D57N	FALSE	CAN	JSY14	1	rnr1D57N-Rep1	TGC	G>T	A/T+1	G/C-1	CG>AT	CG>AT	GTGATTGCCCAAG	GCCCAAG	ACG	ACG	C	A	C>A	C>A_ACG	CG>AT_GCCCAAG	7	FALSE	FALSE
12_v.txt	32935	32935-SNV-C-A	SNV	1	C	A	3	21315	0.0140746	63.6667	rnr1D57N	FALSE	CAN	JSY14	1	rnr1D57N-Rep1	GCC	C>A	A/T+1	G/C-1	CG>AT	CG>AT	TGATTGCCCAAGA	CCCAAGA	CGG	GCC	C	T	C>A	C>A_GCC	CG>AT_CCCAAGA	7	FALSE	FALSE
12_v.txt	32937	32937-SNV-C-A	SNV	1	C	A	13	21315	0.0609899	52.9064	rnr1D57N	FALSE	CAN	JSY14	1	rnr1D57N-Rep1	CCA	C>A	A/T+1	G/C-1	CG>AT	CG>AT	ATTGCCCAAGAAA	CAAGAAA	GGT	CCA	C	T	C>A	C>A_CCA	CG>AT_CAAGAAA	7	FALSE	FALSE
12_v.txt	32940	32940-SNV-G-T	SNV	1	G	T	18	21315	0.0844476	38.7222	rnr1D57N	FALSE	CAN	JSY14	1	rnr1D57N-Rep1	AGA	G>T	A/T+1	G/C-1	CG>AT	CG>AT	GCCCAAGAAAACC	GAAAACC	TCT	TCT	C	A	C>A	C>A_TCT	CG>AT_GAAAACC	7	FALSE	FALSE
12_v.txt	32970	32970-SNV-C-A	SNV	1	C	A	24	21314	0.112602	59.625	rnr1D57N	FALSE	CAN	JSY14	1	rnr1D57N-Rep1	ACC	C>A	A/T+1	G/C-1	CG>AT	CG>AT	GCCGCACCAAATG	CCAAATG	TGG	ACC	C	T	C>A	C>A_ACC	CG>AT_CCAAATG	7	FALSE	FALSE
12_v.txt	33012	33012-SNV-G-T	SNV	1	G	T	11	21315	0.0516069	61.3636	rnr1D57N	FALSE	CAN	JSY14	1	rnr1D57N-Rep1	AGA	G>T	A/T+1	G/C-1	CG>AT	CG>AT	GTGAAAGAGGATG	GAGGATG	TCT	TCT	C	A	C>A	C>A_TCT	CG>AT_GAGGATG	7	FALSE	FALSE
12_v.txt	33025	33025-SNV-G-T	SNV	1	G	T	14	21315	0.0656814	56.8571	rnr1D57N	FALSE	CAN	JSY14	1	rnr1D57N-Rep1	GGG	G>T	A/T+1	G/C-1	CG>AT	CG>AT	TAACAGGGATGAA	GGATGAA	CCC	CCC	C	A	C>A	C>A_CCC	CG>AT_GGATGAA	7	FALSE	FALSE
12_v.txt	33033	33033-SNV-G-T	SNV	1	G	T	38	21315	0.178278	59.1842	rnr1D57N	FALSE	CAN	JSY14	1	rnr1D57N-Rep1	TGT	G>T	A/T+1	G/C-1	CG>AT	CG>AT	ATGAATGTAGCCA	GTAGCCA	ACA	ACA	C	A	C>A	C>A_ACA	CG>AT_GTAGCCA	7	FALSE	FALSE
12_v.txt	33043	33043-SNV-C-A	SNV	1	C	A	37	21315	0.173587	63.0811	rnr1D57N	FALSE	CAN	JSY14	1	rnr1D57N-Rep1	TCA	C>A	A/T+1	G/C-1	CG>AT	CG>AT	CCATTTCACCCAA	CACCCAA	AGT	TCA	C	T	C>A	C>A_TCA	CG>AT_CACCCAA	7	FALSE	FALSE
12_v.txt	33051	33051-SNV-G-T	SNV	1	G	T	39	21315	0.18297	59.9231	rnr1D57N	FALSE	CAN	JSY14	1	rnr1D57N-Rep1	GGA	G>T	A/T+1	G/C-1	CG>AT	CG>AT	CCCAAGGACTGCG	GACTGCG	CCT	CCT	C	A	C>A	C>A_CCT	CG>AT_GACTGCG	7	FALSE	FALSE
12_v.txt	33056	33056-SNV-C-A	SNV	1	C	A	7	21314	0.0328423	40.2915	rnr1D57N	FALSE	CAN	JSY14	1	rnr1D57N-Rep1	GCG	C>A	A/T+1	G/C-1	CG>AT	CG>AT	GGACTGCGTGACA	CGTGACA	CGC	GCG	C	T	C>A	C>A_GCG	CG>AT_CGTGACA	7	FALSE	FALSE
12_v.txt	33114	33114-SNV-C-A	SNV	1	C	A	5	21315	0.0234577	47.9975	rnr1D57N	FALSE	CAN	JSY14	1	rnr1D57N-Rep1	GCC	C>A	A/T+1	G/C-1	CG>AT	CG>AT	ACTGGGCCGGCGT	CCGGCGT	CGG	GCC	C	T	C>A	C>A_GCC	CG>AT_CCGGCGT	7	FALSE	FALSE
12_v.txt	33115	33115-SNV-C-A	SNV	1	C	A	121	21315	0.567675	46.562	rnr1D57N	FALSE	CAN	JSY14	1	rnr1D57N-Rep1	CCG	C>A	A/T+1	G/C-1	CG>AT	CG>AT	CTGGGCCGGCGTT	CGGCGTT	GGC	CCG	C	T	C>A	C>A_CCG	CG>AT_CGGCGTT	7	FALSE	FALSE
12_v.txt	33118	33118-SNV-C-A	SNV	1	C	A	25	21315	0.117288	41.4	rnr1D57N	FALSE	CAN	JSY14	1	rnr1D57N-Rep1	GCG	C>A	A/T+1	G/C-1	CG>AT	CG>AT	GGCCGGCGTTGGT	CGTTGGT	CGC	GCG	C	T	C>A	C>A_GCG	CG>AT_CGTTGGT	7	FALSE	FALSE
12_v.txt	33151	33151-SNV-G-T	SNV	1	G	T	27	21315	0.126671	38.8889	rnr1D57N	FALSE	CAN	JSY14	1	rnr1D57N-Rep1	AGA	G>T	A/T+1	G/C-1	CG>AT	CG>AT	TGAAAAGACCTGT	GACCTGT	TCT	TCT	C	A	C>A	C>A_TCT	CG>AT_GACCTGT	7	FALSE	FALSE
12_v.txt	33153	33153-SNV-C-A	SNV	1	C	A	12	21315	0.0562984	37.5	rnr1D57N	FALSE	CAN	JSY14	1	rnr1D57N-Rep1	ACC	C>A	A/T+1	G/C-1	CG>AT	CG>AT	AAAAGACCTGTAC	CCTGTAC	TGG	ACC	C	T	C>A	C>A_ACC	CG>AT_CCTGTAC	7	FALSE	FALSE
12_v.txt	33154	33154-SNV-C-A	SNV	1	C	A	24	21315	0.112597	35.8751	rnr1D57N	FALSE	CAN	JSY14	1	rnr1D57N-Rep1	CCT	C>A	A/T+1	G/C-1	CG>AT	CG>AT	AAAGACCTGTACC	CTGTACC	GGA	CCT	C	T	C>A	C>A_CCT	CG>AT_CTGTACC	7	FALSE	FALSE
12_v.txt	33159	33159-SNV-C-A	SNV	1	C	A	10	21315	0.0469153	35.2943	rnr1D57N	FALSE	CAN	JSY14	1	rnr1D57N-Rep1	ACC	C>A	A/T+1	G/C-1	CG>AT	CG>AT	CCTGTACCAATAG	CCAATAG	TGG	ACC	C	T	C>A	C>A_ACC	CG>AT_CCAATAG	7	FALSE	FALSE
12_v.txt	33160	33160-SNV-C-A	SNV	1	C	A	16	21315	0.0750645	37.3121	rnr1D57N	FALSE	CAN	JSY14	1	rnr1D57N-Rep1	CCA	C>A	A/T+1	G/C-1	CG>AT	CG>AT	CTGTACCAATAGT	CAATAGT	GGT	CCA	C	T	C>A	C>A_CCA	CG>AT_CAATAGT	7	FALSE	FALSE
12_v.txt	33168	33168-SNV-C-A	SNV	1	C	A	28	21296	0.13148	37.9643	rnr1D57N	FALSE	CAN	JSY14	1	rnr1D57N-Rep1	ACC	C>A	A/T+1	G/C-1	CG>AT	CG>AT	ATAGTACCACCAA	CCACCAA	TGG	ACC	C	T	C>A	C>A_ACC	CG>AT_CCACCAA	7	FALSE	FALSE
12_v.txt	33169	33169-SNV-C-A	SNV	1	C	A	170	21296	0.798272	37.7056	rnr1D57N	FALSE	CAN	JSY14	1	rnr1D57N-Rep1	CCA	C>A	A/T+1	G/C-1	CG>AT	CG>AT	TAGTACCACCAAG	CACCAAG	GGT	CCA	C	T	C>A	C>A_CCA	CG>AT_CACCAAG	7	FALSE	FALSE
12_v.txt	33177	33177-SNV-G-T	SNV	1	G	T	11	21290	0.0516674	37.8182	rnr1D57N	FALSE	CAN	JSY14	1	rnr1D57N-Rep1	GGC	G>T	A/T+1	G/C-1	CG>AT	CG>AT	CCAAGGGCAATCA	GCAATCA	CCG	CCG	C	A	C>A	C>A_CCG	CG>AT_GCAATCA	7	FALSE	FALSE
12_v.txt	33210	33210-SNV-C-A	SNV	1	C	A	18	20300	0.08867	42.7222	rnr1D57N	FALSE	CAN	JSY14	1	rnr1D57N-Rep1	TCT	C>A	A/T+1	G/C-1	CG>AT	CG>AT	AGCTCTCTCTTCA	CTCTTCA	AGA	TCT	C	T	C>A	C>A_TCT	CG>AT_CTCTTCA	7	FALSE	FALSE
12_v.txt	33220	33220-SNV-C-A	SNV	1	C	A	33	20312	0.162466	41.4545	rnr1D57N	FALSE	CAN	JSY14	1	rnr1D57N-Rep1	TCA	C>A	A/T+1	G/C-1	CG>AT	CG>AT	TCACTTCAGCGTT	CAGCGTT	AGT	TCA	C	T	C>A	C>A_TCA	CG>AT_CAGCGTT	7	FALSE	FALSE
12_v.txt	33247	33247-SNV-C-A	SNV	1	C	A	22	20312	0.10831	41.7273	rnr1D57N	FALSE	CAN	JSY14	1	rnr1D57N-Rep1	TCA	C>A	A/T+1	G/C-1	CG>AT	CG>AT	CATCTTCATCACC	CATCACC	AGT	TCA	C	T	C>A	C>A_TCA	CG>AT_CATCACC	7	FALSE	FALSE
12_v.txt	33325	33325-SNV-C-A	SNV	1	C	A	360	20312	1.77235	59.7194	rnr1D57N	FALSE	CAN	JSY14	1	rnr1D57N-Rep1	TCT	C>A	A/T+1	G/C-1	CG>AT	CG>AT	ACAATTCTTTACT	CTTTACT	AGA	TCT	C	T	C>A	C>A_TCT	CG>AT_CTTTACT	7	FALSE	FALSE
12_v.txt	33354	33354-SNV-G-T	SNV	1	G	T	163	20305	0.802758	29.8683	rnr1D57N	FALSE	CAN	JSY14	1	rnr1D57N-Rep1	TGA	G>T	A/T+1	G/C-1	CG>AT	CG>AT	GGTATTGACCCAC	GACCCAC	ACT	ACT	C	A	C>A	C>A_ACT	CG>AT_GACCCAC	7	FALSE	FALSE
12_v.txt	33385	33385-SNV-C-A	SNV	1	C	A	21	20312	0.103387	54.1429	rnr1D57N	FALSE	CAN	JSY14	1	rnr1D57N-Rep1	TCA	C>A	A/T+1	G/C-1	CG>AT	CG>AT	AAGCTTCAACGTC	CAACGTC	AGT	TCA	C	T	C>A	C>A_TCA	CG>AT_CAACGTC	7	FALSE	FALSE
12_v.txt	33415	33415-SNV-C-A	SNV	1	C	A	36	20312	0.177235	34.6389	rnr1D57N	FALSE	CAN	JSY14	1	rnr1D57N-Rep1	TCA	C>A	A/T+1	G/C-1	CG>AT	CG>AT	CCGGCTCATTGTA	CATTGTA	AGT	TCA	C	T	C>A	C>A_TCA	CG>AT_CATTGTA	7	FALSE	FALSE
12_v.txt	33433	33433-SNV-C-A	SNV	1	C	A	27	20312	0.132926	41.7407	rnr1D57N	FALSE	CAN	JSY14	1	rnr1D57N-Rep1	TCC	C>A	A/T+1	G/C-1	CG>AT	CG>AT	GCTTCTCCTCTAT	CCTCTAT	AGG	TCC	C	T	C>A	C>A_TCC	CG>AT_CCTCTAT	7	FALSE	FALSE
12_v.txt	33436	33436-SNV-C-A	SNV	1	C	A	34	20312	0.167389	47.3529	rnr1D57N	FALSE	CAN	JSY14	1	rnr1D57N-Rep1	TCT	C>A	A/T+1	G/C-1	CG>AT	CG>AT	TCTCCTCTATGTC	CTATGTC	AGA	TCT	C	T	C>A	C>A_TCT	CG>AT_CTATGTC	7	FALSE	FALSE
12_v.txt	33456	33456-SNV-G-T	SNV	1	G	T	33	20312	0.162466	25.6061	rnr1D57N	FALSE	CAN	JSY14	1	rnr1D57N-Rep1	TGA	G>T	A/T+1	G/C-1	CG>AT	CG>AT	TCTTTTGAATTTG	GAATTTG	ACT	ACT	C	A	C>A	C>A_ACT	CG>AT_GAATTTG	7	FALSE	FALSE
12_v.txt	33474	33474-SNV-C-A	SNV	1	C	A	42	20311	0.206785	33.7304	rnr1D57N	FALSE	CAN	JSY14	1	rnr1D57N-Rep1	GCC	C>A	A/T+1	G/C-1	CG>AT	CG>AT	GCTATGCCTTTTT	CCTTTTT	CGG	GCC	C	T	C>A	C>A_GCC	CG>AT_CCTTTTT	7	FALSE	FALSE
12_v.txt	33475	33475-SNV-C-A	SNV	1	C	A	19	20311	0.0935454	37.0011	rnr1D57N	FALSE	CAN	JSY14	1	rnr1D57N-Rep1	CCT	C>A	A/T+1	G/C-1	CG>AT	CG>AT	CTATGCCTTTTTT	CTTTTTT	GGA	CCT	C	T	C>A	C>A_CCT	CG>AT_CTTTTTT	7	FALSE	FALSE
12_v.txt	31806	31806-Replacement-C-AA	Replacement	2	C	AA	1	11167	0.00896	38.0006	rnr1D57N	FALSE	CAN	JSY14	1	rnr1D57N-Rep1	CCA	nope	>1bp-ins	G/C-1	none	Replac.	ATCTTCCAAATAA	CAAATAA	GGT	CCA	C	none	nope	nope_CCA	Replac._CAAATAA	7	FALSE	FALSE
12_v.txt	32164	32164-Replacement-CG-A	Replacement	2	CG	A	13	16625	0.0781955	53.7692	rnr1D57N	FALSE	CAN	JSY14	1	rnr1D57N-Rep1	GCG	nope	A/T+1	>1bpdel	none	Replac.	CCAAAGCGCCAAA	CGCCAAA	CGC	GCG	CG	T	NA	NA_GCG	Replac._CGCCAAA	7	FALSE	FALSE
12_v.txt	32494	32494-Replacement-C-TA	Replacement	2	C	TA	1	29225	0.00342	35.5	rnr1D57N	FALSE	CAN	JSY14	1	rnr1D57N-Rep1	ACA	nope	>1bp-ins	G/C-1	none	Replac.	GGAAAACAACTTT	CAACTTT	TGT	ACA	C	none	nope	nope_ACA	Replac._CAACTTT	7	FALSE	FALSE
12_v.txt	32814	32814-Replacement-AAC-G	Replacement	3	AAC	G	29	26053	0.111312	42.9655	rnr1D57N	FALSE	CAN	JSY14	1	rnr1D57N-Rep1	GAA	nope	G/C+1	>1bpdel	none	Replac.	ACAGGGAACAAGT	AACAAGT	CTT	GAA	AAC	C	NA	NA_GAA	Replac._AACAAGT	7	FALSE	FALSE
12_v.txt	32841	32841-Replacement-C-TA	Replacement	2	C	TA	1	26053	0.00384	64	rnr1D57N	FALSE	CAN	JSY14	1	rnr1D57N-Rep1	CCA	nope	>1bp-ins	G/C-1	none	Replac.	ATTACCCAAAAAA	CAAAAAA	GGT	CCA	C	none	nope	nope_CCA	Replac._CAAAAAA	7	FALSE	FALSE
12_v.txt	32937	32937-Replacement-C-TG	Replacement	2	C	TG	1	21315	0.00469	22.5	rnr1D57N	FALSE	CAN	JSY14	1	rnr1D57N-Rep1	CCA	nope	>1bp-ins	G/C-1	none	Replac.	ATTGCCCAAGAAA	CAAGAAA	GGT	CCA	C	none	nope	nope_CCA	Replac._CAAGAAA	7	FALSE	FALSE
12_v.txt	31875	31875-MNV-TA-GG	MNV	2	TA	GG	8	11167	0.0716397	47.4375	rnr1D57N	FALSE	CAN	JSY14	1	rnr1D57N-Rep1	ATA	nope	>1bp-ins	>1bpdel	none	MNV	GAGATATAGGCGG	TAGGCGG	TAT	ATA	TA	none	NA	NA_ATA	MNV_TAGGCGG	7	FALSE	FALSE
12_v.txt	31956	31956-MNV-GT-TA	MNV	2	GT	TA	23	16625	0.138346	36.8478	rnr1D57N	FALSE	CAN	JSY14	1	rnr1D57N-Rep1	TGT	nope	>1bp-ins	>1bpdel	none	MNV	ATAAATGTGGCCG	GTGGCCG	ACA	TGT	GT	none	NA	NA_TGT	MNV_GTGGCCG	7	FALSE	FALSE
12_v.txt	32100	32100-MNV-GT-TG	MNV	2	GT	TG	6	16625	0.0360902	63.75	rnr1D57N	FALSE	CAN	JSY14	1	rnr1D57N-Rep1	AGT	nope	>1bp-ins	>1bpdel	none	MNV	ACACCAGTGATAT	GTGATAT	TCA	AGT	GT	none	NA	NA_AGT	MNV_GTGATAT	7	FALSE	FALSE
12_v.txt	32292	32292-MNV-GAA-ATT	MNV	3	GAA	ATT	3	29225	0.0102652	37.3333	rnr1D57N	FALSE	CAN	JSY14	1	rnr1D57N-Rep1	TGA	nope	>1bp-ins	>1bpdel	none	MNV	ATATTTGAATTTG	GAATTTG	ACT	TGA	GAA	none	NA	NA_TGA	MNV_GAATTTG	7	FALSE	FALSE
12_v.txt	32293	32293-MNV-AA-GC	MNV	2	AA	GC	1	29225	0.00342	64	rnr1D57N	FALSE	CAN	JSY14	1	rnr1D57N-Rep1	GAA	nope	>1bp-ins	>1bpdel	none	MNV	TATTTGAATTTGC	AATTTGC	CTT	GAA	AA	none	NA	NA_GAA	MNV_AATTTGC	7	FALSE	FALSE
12_v.txt	32541	32541-MNV-TCACC-GATAA	MNV	5	TCACC	GATAA	1	29225	0.00342	17.4	rnr1D57N	FALSE	CAN	JSY14	1	rnr1D57N-Rep1	TTC	nope	>1bp-ins	>1bpdel	none	MNV	GCAGCTTCACCAG	TCACCAG	AAG	TTC	TCACC	none	NA	NA_TTC	MNV_TCACCAG	7	FALSE	FALSE
12_v.txt	32544	32544-MNV-CC-AA	MNV	2	CC	AA	3	29224	0.0102655	32.6667	rnr1D57N	FALSE	CAN	JSY14	1	rnr1D57N-Rep1	ACC	nope	>1bp-ins	>1bpdel	none	MNV	GCTTCACCAGCAG	CCAGCAG	TGG	ACC	CC	none	NA	NA_ACC	MNV_CCAGCAG	7	FALSE	FALSE
12_v.txt	32787	32787-MNV-TC-CT	MNV	2	TC	CT	17	26053	0.0652516	47.1176	rnr1D57N	FALSE	CAN	JSY14	1	rnr1D57N-Rep1	CTC	nope	>1bp-ins	>1bpdel	none	MNV	CAGAACTCGAATT	TCGAATT	GAG	CTC	TC	none	NA	NA_CTC	MNV_TCGAATT	7	FALSE	FALSE
12_v.txt	32797	32797-MNV-CG-TT	MNV	2	CG	TT	51	26053	0.195755	46.3622	rnr1D57N	FALSE	CAN	JSY14	1	rnr1D57N-Rep1	CCG	nope	>1bp-ins	>1bpdel	none	MNV	ATTCACCGTAATA	CGTAATA	GGC	CCG	CG	none	NA	NA_CCG	MNV_CGTAATA	7	FALSE	FALSE
12_v.txt	32914	32914-MNV-GT-AC	MNV	2	GT	AC	45	21315	0.211119	47.8945	rnr1D57N	FALSE	CAN	JSY14	1	rnr1D57N-Rep1	AGT	nope	>1bp-ins	>1bpdel	none	MNV	CACTAAGTTCCAG	GTTCCAG	TCA	AGT	GT	none	NA	NA_AGT	MNV_GTTCCAG	7	FALSE	FALSE
12_v.txt	32958	32958-MNV-CC-TG	MNV	2	CC	TG	1	21315	0.00469	64	rnr1D57N	FALSE	CAN	JSY14	1	rnr1D57N-Rep1	ACC	nope	>1bp-ins	>1bpdel	none	MNV	ATGTAACCATTGG	CCATTGG	TGG	ACC	CC	none	NA	NA_ACC	MNV_CCATTGG	7	FALSE	FALSE
12_v.txt	33114	33114-MNV-CC-AA	MNV	2	CC	AA	1	21315	0.00469	35.5	rnr1D57N	FALSE	CAN	JSY14	1	rnr1D57N-Rep1	GCC	nope	>1bp-ins	>1bpdel	none	MNV	ACTGGGCCGGCGT	CCGGCGT	CGG	GCC	CC	none	NA	NA_GCC	MNV_CCGGCGT	7	FALSE	FALSE
12_v.txt	33114	33114-MNV-CC-TT	MNV	2	CC	TT	1	21315	0.00469	38	rnr1D57N	FALSE	CAN	JSY14	1	rnr1D57N-Rep1	GCC	nope	>1bp-ins	>1bpdel	none	MNV	ACTGGGCCGGCGT	CCGGCGT	CGG	GCC	CC	none	NA	NA_GCC	MNV_CCGGCGT	7	FALSE	FALSE
12_v.txt	33153	33153-MNV-CC-AA	MNV	2	CC	AA	1	21315	0.00469	36	rnr1D57N	FALSE	CAN	JSY14	1	rnr1D57N-Rep1	ACC	nope	>1bp-ins	>1bpdel	none	MNV	AAAAGACCTGTAC	CCTGTAC	TGG	ACC	CC	none	NA	NA_ACC	MNV_CCTGTAC	7	FALSE	FALSE
12_v.txt	33159	33159-MNV-CC-AA	MNV	2	CC	AA	1	21315	0.00469	34	rnr1D57N	FALSE	CAN	JSY14	1	rnr1D57N-Rep1	ACC	nope	>1bp-ins	>1bpdel	none	MNV	CCTGTACCAATAG	CCAATAG	TGG	ACC	CC	none	NA	NA_ACC	MNV_CCAATAG	7	FALSE	FALSE
12_v.txt	33159	33159-MNV-CC-TT	MNV	2	CC	TT	2	21315	0.00938	37.5	rnr1D57N	FALSE	CAN	JSY14	1	rnr1D57N-Rep1	ACC	nope	>1bp-ins	>1bpdel	none	MNV	CCTGTACCAATAG	CCAATAG	TGG	ACC	CC	none	NA	NA_ACC	MNV_CCAATAG	7	FALSE	FALSE
12_v.txt	33168	33168-MNV-CC-AT	MNV	2	CC	AT	5	21296	0.0234786	38	rnr1D57N	FALSE	CAN	JSY14	1	rnr1D57N-Rep1	ACC	nope	>1bp-ins	>1bpdel	none	MNV	ATAGTACCACCAA	CCACCAA	TGG	ACC	CC	none	NA	NA_ACC	MNV_CCACCAA	7	FALSE	FALSE
12_v.txt	31723	31723-Insertion---A	Insertion	1	-	A	3	11167	0.0268649	64	rnr1D57N	FALSE	CAN	JSY14	1	rnr1D57N-Rep1	CAA	nope	A/T+1	>1bpdel	none	A/T+1	TGTCCCAAAAAGT	AAAAAGT	GTT	CAA	-	T	NA	NA_CAA	A/T+1_AAAAAGT	7	FALSE	FALSE
12_v.txt	31881	31881-Insertion---CA	Insertion	2	-	CA	1	11167	0.00896	37	rnr1D57N	FALSE	CAN	JSY14	1	rnr1D57N-Rep1	GGC	nope	>1bp-ins	>1bpdel	none	>1bp-ins	TAGGCGGCAGCAA	GCAGCAA	CCG	GGC	-	none	NA	NA_GGC	>1bp-ins_GCAGCAA	7	FALSE	FALSE
12_v.txt	31883	31883-Insertion---AA	Insertion	2	-	AA	1	11167	0.00896	38	rnr1D57N	FALSE	CAN	JSY14	1	rnr1D57N-Rep1	CAG	nope	>1bp-ins	>1bpdel	none	>1bp-ins	GGCGGCAGCAAAG	AGCAAAG	GTC	CAG	-	none	NA	NA_CAG	>1bp-ins_AGCAAAG	7	FALSE	FALSE
12_v.txt	31883	31883-Insertion---AGCAA	Insertion	5	-	AGCAA	33	11167	0.295514	44.4485	rnr1D57N	FALSE	CAN	JSY14	1	rnr1D57N-Rep1	CAG	nope	>1bp-ins	>1bpdel	none	>1bp-ins	GGCGGCAGCAAAG	AGCAAAG	GTC	CAG	-	none	NA	NA_CAG	>1bp-ins_AGCAAAG	7	FALSE	FALSE
12_v.txt	31902	31902-Insertion---C	Insertion	1	-	C	11	11162	0.0985486	44.9091	rnr1D57N	FALSE	CAN	JSY14	1	rnr1D57N-Rep1	GAA	nope	G/C+1	>1bpdel	none	G/C+1	CCATTGAATTTTG	AATTTTG	CTT	GAA	-	G	NA	NA_GAA	G/C+1_AATTTTG	7	FALSE	FALSE
12_v.txt	31913	31913-Insertion---A	Insertion	1	-	A	10	11162	0.0895897	38	rnr1D57N	FALSE	CAN	JSY14	1	rnr1D57N-Rep1	CAA	nope	A/T+1	>1bpdel	none	A/T+1	TGGTGCAAAAGCC	AAAAGCC	GTT	CAA	-	T	NA	NA_CAA	A/T+1_AAAAGCC	7	FALSE	FALSE
12_v.txt	31969	31969-Insertion---A	Insertion	1	-	A	3	16625	0.0180451	36.6667	rnr1D57N	FALSE	CAN	JSY14	1	rnr1D57N-Rep1	TAA	nope	A/T+1	>1bpdel	none	A/T+1	CATAATAAGCCAA	AAGCCAA	ATT	TAA	-	T	NA	NA_TAA	A/T+1_AAGCCAA	7	FALSE	FALSE
12_v.txt	32067	32067-Insertion---AA	Insertion	2	-	AA	10	16625	0.0601504	63.05	rnr1D57N	FALSE	CAN	JSY14	1	rnr1D57N-Rep1	GAT	nope	>1bp-ins	>1bpdel	none	>1bp-ins	ATTGAGATAAATA	ATAAATA	CTA	GAT	-	none	NA	NA_GAT	>1bp-ins_ATAAATA	7	FALSE	FALSE
12_v.txt	32081	32081-Insertion---A	Insertion	1	-	A	246	16625	1.4797	63.7927	rnr1D57N	FALSE	CAN	JSY14	1	rnr1D57N-Rep1	CAA	nope	A/T+1	>1bpdel	none	A/T+1	CCATGCAAAAAAG	AAAAAAG	GTT	CAA	-	T	NA	NA_CAA	A/T+1_AAAAAAG	7	FALSE	FALSE
12_v.txt	32081	32081-Insertion---AA	Insertion	2	-	AA	7	16625	0.0421053	63.6429	rnr1D57N	FALSE	CAN	JSY14	1	rnr1D57N-Rep1	CAA	nope	>1bp-ins	>1bpdel	none	>1bp-ins	CCATGCAAAAAAG	AAAAAAG	GTT	CAA	-	none	NA	NA_CAA	>1bp-ins_AAAAAAG	7	FALSE	FALSE
12_v.txt	32087	32087-Insertion---G	Insertion	1	-	G	1	16625	0.00602	64	rnr1D57N	FALSE	CAN	JSY14	1	rnr1D57N-Rep1	AGC	nope	G/C+1	>1bpdel	none	G/C+1	AAAAAAGCCTGCA	GCCTGCA	TCG	AGC	-	C	NA	NA_AGC	G/C+1_GCCTGCA	7	FALSE	FALSE
12_v.txt	32166	32166-Insertion---C	Insertion	1	-	C	3	16625	0.0180451	46.6667	rnr1D57N	FALSE	CAN	JSY14	1	rnr1D57N-Rep1	GCC	nope	G/C+1	>1bpdel	none	G/C+1	AAAGCGCCAAATG	CCAAATG	CGG	GCC	-	G	NA	NA_GCC	G/C+1_CCAAATG	7	FALSE	FALSE
12_v.txt	32261	32261-Insertion---A	Insertion	1	-	A	5	29225	0.0171086	36.6	rnr1D57N	FALSE	CAN	JSY14	1	rnr1D57N-Rep1	CAA	nope	A/T+1	>1bpdel	none	A/T+1	TAGACCAAATAAA	AAATAAA	GTT	CAA	-	T	NA	NA_CAA	A/T+1_AAATAAA	7	FALSE	FALSE
12_v.txt	32289	32289-Insertion---T	Insertion	1	-	T	34	29225	0.116339	55.3824	rnr1D57N	FALSE	CAN	JSY14	1	rnr1D57N-Rep1	ATT	nope	A/T+1	>1bpdel	none	A/T+1	TAAATATTTGAAT	TTTGAAT	TAA	ATT	-	A	NA	NA_ATT	A/T+1_TTTGAAT	7	FALSE	FALSE
12_v.txt	32322	32322-Insertion---A	Insertion	1	-	A	23	29225	0.0786997	62.8696	rnr1D57N	FALSE	CAN	JSY14	1	rnr1D57N-Rep1	GAT	nope	A/T+1	>1bpdel	none	A/T+1	GTTAAGATAACAG	ATAACAG	CTA	GAT	-	T	NA	NA_GAT	A/T+1_ATAACAG	7	FALSE	FALSE
12_v.txt	32346	32346-Insertion---A	Insertion	1	-	A	3	29225	0.0102652	64	rnr1D57N	FALSE	CAN	JSY14	1	rnr1D57N-Rep1	CAA	nope	A/T+1	>1bpdel	none	A/T+1	TGTGGCAAAACCT	AAAACCT	GTT	CAA	-	T	NA	NA_CAA	A/T+1_AAAACCT	7	FALSE	FALSE
12_v.txt	32352	32352-Insertion---T	Insertion	1	-	T	9	29225	0.0307956	61.5556	rnr1D57N	FALSE	CAN	JSY14	1	rnr1D57N-Rep1	CTT	nope	A/T+1	>1bpdel	none	A/T+1	AAAACCTTTGTAC	TTTGTAC	GAA	CTT	-	A	NA	NA_CTT	A/T+1_TTTGTAC	7	FALSE	FALSE
12_v.txt	32473	32473-Insertion---AGA	Insertion	3	-	AGA	46	29225	0.157399	43.913	rnr1D57N	FALSE	CAN	JSY14	1	rnr1D57N-Rep1	TAG	nope	>1bp-ins	>1bpdel	none	>1bp-ins	CAATGTAGAAGGT	AGAAGGT	ATC	TAG	-	none	NA	NA_TAG	>1bp-ins_AGAAGGT	7	FALSE	FALSE
12_v.txt	32488	32488-Insertion---G	Insertion	1	-	G	1	29225	0.00342	64	rnr1D57N	FALSE	CAN	JSY14	1	rnr1D57N-Rep1	CGG	nope	G/C+1	>1bpdel	none	G/C+1	AGATACGGAAAAC	GGAAAAC	GCC	CGG	-	C	NA	NA_CGG	G/C+1_GGAAAAC	7	FALSE	FALSE
12_v.txt	32490	32490-Insertion---A	Insertion	1	-	A	265	29225	0.906758	47.9736	rnr1D57N	FALSE	CAN	JSY14	1	rnr1D57N-Rep1	GAA	nope	A/T+1	>1bpdel	none	A/T+1	ATACGGAAAACAA	AAAACAA	CTT	GAA	-	T	NA	NA_GAA	A/T+1_AAAACAA	7	FALSE	FALSE
12_v.txt	32498	32498-Insertion---T	Insertion	1	-	T	23	29225	0.0786997	38.7826	rnr1D57N	FALSE	CAN	JSY14	1	rnr1D57N-Rep1	CTT	nope	A/T+1	>1bpdel	none	A/T+1	AACAACTTTTTTG	TTTTTTG	GAA	CTT	-	A	NA	NA_CTT	A/T+1_TTTTTTG	7	FALSE	FALSE
12_v.txt	32528	32528-Insertion---G	Insertion	1	-	G	21	29225	0.0718563	38.9048	rnr1D57N	FALSE	CAN	JSY14	1	rnr1D57N-Rep1	TGG	nope	G/C+1	>1bpdel	none	G/C+1	TTTTCTGGGGTTT	GGGGTTT	ACC	TGG	-	C	NA	NA_TGG	G/C+1_GGGGTTT	7	FALSE	FALSE
12_v.txt	32598	32598-Insertion---AA	Insertion	2	-	AA	5	26053	0.0191916	46.5	rnr1D57N	FALSE	CAN	JSY14	1	rnr1D57N-Rep1	CAA	nope	>1bp-ins	>1bpdel	none	>1bp-ins	TTAATCAAAGAGG	AAAGAGG	GTT	CAA	-	none	NA	NA_CAA	>1bp-ins_AAAGAGG	7	FALSE	FALSE
12_v.txt	32631	32631-Insertion---T	Insertion	1	-	T	157	26053	0.602618	53.3121	rnr1D57N	FALSE	CAN	JSY14	1	rnr1D57N-Rep1	GTT	nope	A/T+1	>1bpdel	none	A/T+1	CCTTCGTTTTTAT	TTTTTAT	CAA	GTT	-	A	NA	NA_GTT	A/T+1_TTTTTAT	7	FALSE	FALSE
12_v.txt	32658	32658-Insertion---C	Insertion	1	-	C	1	26053	0.00384	64	rnr1D57N	FALSE	CAN	JSY14	1	rnr1D57N-Rep1	ACC	nope	G/C+1	>1bpdel	none	G/C+1	CCTGGACCCCAGG	CCCCAGG	TGG	ACC	-	G	NA	NA_ACC	G/C+1_CCCCAGG	7	FALSE	FALSE
12_v.txt	32665	32665-Insertion---CACCTGGGTTTCTCCAATAACGGAATC	Insertion	27	-	CACCTGGGTTTCTCCAATAACGGAATC	7	26053	0.0268683	52.6138	rnr1D57N	FALSE	CAN	JSY14	1	rnr1D57N-Rep1	GCA	nope	>1bp-ins	>1bpdel	none	>1bp-ins	CCCAGGCACCTGG	CACCTGG	CGT	GCA	-	none	NA	NA_GCA	>1bp-ins_CACCTGG	7	FALSE	FALSE
12_v.txt	32678	32678-Insertion---CCAATAACGGAATCCAACTGGGCCGGTAACCCCAGCA	Insertion	37	-	CCAATAACGGAATCCAACTGGGCCGGTAACCCCAGCA	28	26053	0.107473	59.3996	rnr1D57N	FALSE	CAN	JSY14	1	rnr1D57N-Rep1	TCC	nope	>1bp-ins	>1bpdel	none	>1bp-ins	GTTTCTCCAATAA	CCAATAA	AGG	TCC	-	none	NA	NA_TCC	>1bp-ins_CCAATAA	7	FALSE	FALSE
12_v.txt	32728	32728-Insertion---A	Insertion	1	-	A	360	26053	1.3818	61.5444	rnr1D57N	FALSE	CAN	JSY14	1	rnr1D57N-Rep1	CAA	nope	A/T+1	>1bpdel	none	A/T+1	CCATACAAAAACA	AAAAACA	GTT	CAA	-	T	NA	NA_CAA	A/T+1_AAAAACA	7	FALSE	FALSE
12_v.txt	32760	32760-Insertion---AAAACTTTGATGGAAGCGACCC	Insertion	22	-	AAAACTTTGATGGAAGCGACCC	16	26053	0.0614133	54.0909	rnr1D57N	FALSE	CAN	JSY14	1	rnr1D57N-Rep1	TAA	nope	>1bp-ins	>1bpdel	none	>1bp-ins	ATGGCTAAAACTT	AAAACTT	ATT	TAA	-	none	NA	NA_TAA	>1bp-ins_AAAACTT	7	FALSE	FALSE
12_v.txt	32802	32802-Insertion---T	Insertion	1	-	T	11	26053	0.0422216	49.3636	rnr1D57N	FALSE	CAN	JSY14	1	rnr1D57N-Rep1	ATA	nope	A/T+1	>1bpdel	none	A/T+1	CCGTAATATTTGA	TATTTGA	TAT	ATA	-	A	NA	NA_ATA	A/T+1_TATTTGA	7	FALSE	FALSE
12_v.txt	32839	32839-Insertion---C	Insertion	1	-	C	1	26053	0.00384	38	rnr1D57N	FALSE	CAN	JSY14	1	rnr1D57N-Rep1	ACC	nope	G/C+1	>1bpdel	none	G/C+1	TAATTACCCAAAA	CCCAAAA	TGG	ACC	-	G	NA	NA_ACC	G/C+1_CCCAAAA	7	FALSE	FALSE
12_v.txt	32840	32840-Insertion---A	Insertion	1	-	A	9	26053	0.034545	40.8889	rnr1D57N	FALSE	CAN	JSY14	1	rnr1D57N-Rep1	CCC	nope	A/T+1	>1bpdel	none	A/T+1	AATTACCCAAAAA	CCAAAAA	GGG	CCC	-	T	NA	NA_CCC	A/T+1_CCAAAAA	7	FALSE	FALSE
12_v.txt	32842	32842-Insertion---A	Insertion	1	-	A	434	26053	1.66584	43.7097	rnr1D57N	FALSE	CAN	JSY14	1	rnr1D57N-Rep1	CAA	nope	A/T+1	>1bpdel	none	A/T+1	TTACCCAAAAAAT	AAAAAAT	GTT	CAA	-	T	NA	NA_CAA	A/T+1_AAAAAAT	7	FALSE	FALSE
12_v.txt	32842	32842-Insertion---AA	Insertion	2	-	AA	2	26053	0.00768	38	rnr1D57N	FALSE	CAN	JSY14	1	rnr1D57N-Rep1	CAA	nope	>1bp-ins	>1bpdel	none	>1bp-ins	TTACCCAAAAAAT	AAAAAAT	GTT	CAA	-	none	NA	NA_CAA	>1bp-ins_AAAAAAT	7	FALSE	FALSE
12_v.txt	32842	32842-Insertion---G	Insertion	1	-	G	40	26053	0.153533	41.25	rnr1D57N	FALSE	CAN	JSY14	1	rnr1D57N-Rep1	CAA	nope	G/C+1	>1bpdel	none	G/C+1	TTACCCAAAAAAT	AAAAAAT	GTT	CAA	-	C	NA	NA_CAA	G/C+1_AAAAAAT	7	FALSE	FALSE
12_v.txt	32842	32842-Insertion---T	Insertion	1	-	T	1	26053	0.00384	37	rnr1D57N	FALSE	CAN	JSY14	1	rnr1D57N-Rep1	CAA	nope	A/T+1	>1bpdel	none	A/T+1	TTACCCAAAAAAT	AAAAAAT	GTT	CAA	-	A	NA	NA_CAA	A/T+1_AAAAAAT	7	FALSE	FALSE
12_v.txt	32884	32884-Insertion---A	Insertion	1	-	A	1	21315	0.00469	38	rnr1D57N	FALSE	CAN	JSY14	1	rnr1D57N-Rep1	CAA	nope	A/T+1	>1bpdel	none	A/T+1	ACGTCCAAAATTG	AAAATTG	GTT	CAA	-	T	NA	NA_CAA	A/T+1_AAAATTG	7	FALSE	FALSE
12_v.txt	32924	32924-Insertion---AA	Insertion	2	-	AA	5	21315	0.0234577	61.3	rnr1D57N	FALSE	CAN	JSY14	1	rnr1D57N-Rep1	CAA	nope	>1bp-ins	>1bpdel	none	>1bp-ins	CAGGGCAAAAGTG	AAAAGTG	GTT	CAA	-	none	NA	NA_CAA	>1bp-ins_AAAAGTG	7	FALSE	FALSE
12_v.txt	32936	32936-Insertion---A	Insertion	1	-	A	1	21315	0.00469	11	rnr1D57N	FALSE	CAN	JSY14	1	rnr1D57N-Rep1	CCC	nope	A/T+1	>1bpdel	none	A/T+1	GATTGCCCAAGAA	CCAAGAA	GGG	CCC	-	T	NA	NA_CCC	A/T+1_CCAAGAA	7	FALSE	FALSE
12_v.txt	32938	32938-Insertion---G	Insertion	1	-	G	431	21315	2.02205	57.9698	rnr1D57N	FALSE	CAN	JSY14	1	rnr1D57N-Rep1	CAA	nope	G/C+1	>1bpdel	none	G/C+1	TTGCCCAAGAAAA	AAGAAAA	GTT	CAA	-	C	NA	NA_CAA	G/C+1_AAGAAAA	7	FALSE	FALSE
12_v.txt	32938	32938-Insertion---T	Insertion	1	-	T	1	21315	0.00469	64	rnr1D57N	FALSE	CAN	JSY14	1	rnr1D57N-Rep1	CAA	nope	A/T+1	>1bpdel	none	A/T+1	TTGCCCAAGAAAA	AAGAAAA	GTT	CAA	-	A	NA	NA_CAA	A/T+1_AAGAAAA	7	FALSE	FALSE
12_v.txt	33000	33000-Insertion---A	Insertion	1	-	A	11	21315	0.0516069	64	rnr1D57N	FALSE	CAN	JSY14	1	rnr1D57N-Rep1	GAA	nope	A/T+1	>1bpdel	none	A/T+1	TGTGAGAAAACTG	AAAACTG	CTT	GAA	-	T	NA	NA_GAA	A/T+1_AAAACTG	7	FALSE	FALSE
12_v.txt	33072	33072-Insertion---A	Insertion	1	-	A	18	21315	0.0844476	53.7222	rnr1D57N	FALSE	CAN	JSY14	1	rnr1D57N-Rep1	CAA	nope	A/T+1	>1bpdel	none	A/T+1	TATGCCAAAGAAC	AAAGAAC	GTT	CAA	-	T	NA	NA_CAA	A/T+1_AAAGAAC	7	FALSE	FALSE
12_v.txt	33072	33072-Insertion---AA	Insertion	2	-	AA	5	21315	0.0234577	58.8	rnr1D57N	FALSE	CAN	JSY14	1	rnr1D57N-Rep1	CAA	nope	>1bp-ins	>1bpdel	none	>1bp-ins	TATGCCAAAGAAC	AAAGAAC	GTT	CAA	-	none	NA	NA_CAA	>1bp-ins_AAAGAAC	7	FALSE	FALSE
12_v.txt	33331	33331-Insertion---T	Insertion	1	-	T	35	20312	0.172312	60.9143	rnr1D57N	FALSE	CAN	JSY14	1	rnr1D57N-Rep1	CTT	nope	A/T+1	>1bpdel	none	A/T+1	CTTTACTTTTCTC	TTTTCTC	GAA	CTT	-	A	NA	NA_CTT	A/T+1_TTTTCTC	7	FALSE	FALSE
12_v.txt	33355	33355-Insertion---ACCC	Insertion	4	-	ACCC	6	20312	0.0295392	57.7083	rnr1D57N	FALSE	CAN	JSY14	1	rnr1D57N-Rep1	GAC	nope	>1bp-ins	>1bpdel	none	>1bp-ins	GTATTGACCCACG	ACCCACG	CTG	GAC	-	none	NA	NA_GAC	>1bp-ins_ACCCACG	7	FALSE	FALSE
12_v.txt	33452	33452-Insertion---T	Insertion	1	-	T	4	20312	0.0196928	37.5	rnr1D57N	FALSE	CAN	JSY14	1	rnr1D57N-Rep1	CTT	nope	A/T+1	>1bpdel	none	A/T+1	GTCTTCTTTTGAA	TTTTGAA	GAA	CTT	-	A	NA	NA_CTT	A/T+1_TTTTGAA	7	FALSE	FALSE
12_v.txt	31807	31807-Deletion-AAAT--	Deletion	4	AAAT	-	30	11167	0.268649	57.6	rnr1D57N	FALSE	CAN	JSY14	1	rnr1D57N-Rep1	CAA	nope	>1bp-ins	>1bpdel	none	>1bpdel	TCTTCCAAATAAA	AAATAAA	GTT	CAA	AAAT	none	NA	NA_CAA	>1bpdel_AAATAAA	7	FALSE	FALSE
12_v.txt	32086	32086-Deletion-AGC--	Deletion	3	AGC	-	4	16625	0.0240601	64	rnr1D57N	FALSE	CAN	JSY14	1	rnr1D57N-Rep1	AAG	nope	>1bp-ins	>1bpdel	none	>1bpdel	CAAAAAAGCCTGC	AGCCTGC	TTC	AAG	AGC	none	NA	NA_AAG	>1bpdel_AGCCTGC	7	FALSE	FALSE
12_v.txt	32091	32091-Deletion-GC--	Deletion	2	GC	-	4	16625	0.0240601	64	rnr1D57N	FALSE	CAN	JSY14	1	rnr1D57N-Rep1	TGC	nope	>1bp-ins	>1bpdel	none	>1bpdel	AAGCCTGCAACAC	GCAACAC	ACG	TGC	GC	none	NA	NA_TGC	>1bpdel_GCAACAC	7	FALSE	FALSE
12_v.txt	32100	32100-Deletion-GTGA--	Deletion	4	GTGA	-	4	16625	0.0240601	64	rnr1D57N	FALSE	CAN	JSY14	1	rnr1D57N-Rep1	AGT	nope	>1bp-ins	>1bpdel	none	>1bpdel	ACACCAGTGATAT	GTGATAT	TCA	AGT	GTGA	none	NA	NA_AGT	>1bpdel_GTGATAT	7	FALSE	FALSE
12_v.txt	32114	32114-Deletion-CCATTCGAAAACTTTGTCA--	Deletion	19	CCATTCGAAAACTTTGTCA	-	298	16625	1.79248	59.198	rnr1D57N	FALSE	CAN	JSY14	1	rnr1D57N-Rep1	GCC	nope	>1bp-ins	>1bpdel	none	>1bpdel	TAATAGCCATTCG	CCATTCG	CGG	GCC	CCATTCGAAAACTTTGTCA	none	NA	NA_GCC	>1bpdel_CCATTCG	7	FALSE	FALSE
12_v.txt	32360	32360-Deletion-AG--	Deletion	2	AG	-	55	29225	0.188195	59.6182	rnr1D57N	FALSE	CAN	JSY14	1	rnr1D57N-Rep1	CAG	nope	>1bp-ins	>1bpdel	none	>1bpdel	TGTACCAGAGTTC	AGAGTTC	GTC	CAG	AG	none	NA	NA_CAG	>1bpdel_AGAGTTC	7	FALSE	FALSE
12_v.txt	32375	32375-Deletion-AAT--	Deletion	3	AAT	-	17	29225	0.0581694	59.6471	rnr1D57N	FALSE	CAN	JSY14	1	rnr1D57N-Rep1	CAA	nope	>1bp-ins	>1bpdel	none	>1bpdel	AATAGCAATAATA	AATAATA	GTT	CAA	AAT	none	NA	NA_CAA	>1bpdel_AATAATA	7	FALSE	FALSE
12_v.txt	32541	32541-Deletion-TCA--	Deletion	3	TCA	-	46	29225	0.157399	35.5	rnr1D57N	FALSE	CAN	JSY14	1	rnr1D57N-Rep1	TTC	nope	>1bp-ins	>1bpdel	none	>1bpdel	GCAGCTTCACCAG	TCACCAG	AAG	TTC	TCA	none	NA	NA_TTC	>1bpdel_TCACCAG	7	FALSE	FALSE
12_v.txt	32550	32550-Deletion-GTG--	Deletion	3	GTG	-	8	29220	0.0273785	37.5	rnr1D57N	FALSE	CAN	JSY14	1	rnr1D57N-Rep1	AGT	nope	>1bp-ins	>1bpdel	none	>1bpdel	CCAGCAGTGATAC	GTGATAC	TCA	AGT	GTG	none	NA	NA_AGT	>1bpdel_GTGATAC	7	FALSE	FALSE
12_v.txt	32902	32902-Deletion-CA--	Deletion	2	CA	-	45	21315	0.211119	46.0444	rnr1D57N	FALSE	CAN	JSY14	1	rnr1D57N-Rep1	CCA	nope	>1bp-ins	>1bpdel	none	>1bpdel	CTTGGCCAACTAC	CAACTAC	GGT	CCA	CA	none	NA	NA_CCA	>1bpdel_CAACTAC	7	FALSE	FALSE
12_v.txt	33065	33065-Deletion-AT--	Deletion	2	AT	-	26	21315	0.12198	57.9615	rnr1D57N	FALSE	CAN	JSY14	1	rnr1D57N-Rep1	AAT	nope	>1bp-ins	>1bpdel	none	>1bpdel	GACAGAATATGCC	ATATGCC	TTA	AAT	AT	none	NA	NA_AAT	>1bpdel_ATATGCC	7	FALSE	FALSE
12_v.txt	33089	33089-Deletion-AT--	Deletion	2	AT	-	53	21315	0.248651	55.9623	rnr1D57N	FALSE	CAN	JSY14	1	rnr1D57N-Rep1	AAT	nope	>1bp-ins	>1bpdel	none	>1bpdel	AAATAAATATGAT	ATATGAT	TTA	AAT	AT	none	NA	NA_AAT	>1bpdel_ATATGAT	7	FALSE	FALSE
12_v.txt	33094	33094-Deletion-AT--	Deletion	2	AT	-	17	21315	0.079756	57.5294	rnr1D57N	FALSE	CAN	JSY14	1	rnr1D57N-Rep1	GAT	nope	>1bp-ins	>1bpdel	none	>1bpdel	AATATGATATAAG	ATATAAG	CTA	GAT	AT	none	NA	NA_GAT	>1bpdel_ATATAAG	7	FALSE	FALSE
12_v.txt	33474	33474-Deletion-CC--	Deletion	2	CC	-	1	20311	0.00492	10	rnr1D57N	FALSE	CAN	JSY14	1	rnr1D57N-Rep1	GCC	nope	>1bp-ins	>1bpdel	none	>1bpdel	GCTATGCCTTTTT	CCTTTTT	CGG	GCC	CC	none	NA	NA_GCC	>1bpdel_CCTTTTT	7	FALSE	FALSE
12_v.txt	31723	31723-Deletion-A--	Deletion	1	A	-	14	11167	0.125369	58.2143	rnr1D57N	FALSE	CAN	JSY14	1	rnr1D57N-Rep1	CAA	nope	>1bp-ins	A/T-1	none	A/T-1	TGTCCCAAAAAGT	AAAAAGT	GTT	GTT	T	none	T>none	T>none_GTT	A/T-1_AAAAAGT	7	FALSE	FALSE
12_v.txt	31863	31863-Deletion-A--	Deletion	1	A	-	5	11167	0.0447748	39.2	rnr1D57N	FALSE	CAN	JSY14	1	rnr1D57N-Rep1	GAA	nope	>1bp-ins	A/T-1	none	A/T-1	AACAGGAAAATAG	AAAATAG	CTT	CTT	T	none	T>none	T>none_CTT	A/T-1_AAAATAG	7	FALSE	FALSE
12_v.txt	31913	31913-Deletion-A--	Deletion	1	A	-	6	11162	0.0537538	42.1667	rnr1D57N	FALSE	CAN	JSY14	1	rnr1D57N-Rep1	CAA	nope	>1bp-ins	A/T-1	none	A/T-1	TGGTGCAAAAGCC	AAAAGCC	GTT	GTT	T	none	T>none	T>none_GTT	A/T-1_AAAAGCC	7	FALSE	FALSE
12_v.txt	31926	31926-Deletion-C--	Deletion	1	C	-	27	11161	0.241914	37.7037	rnr1D57N	FALSE	CAN	JSY14	1	rnr1D57N-Rep1	ACC	nope	>1bp-ins	G/C-1	none	G/C-1	GTGAAACCTTGAA	CCTTGAA	TGG	ACC	C	none	nope	nope_ACC	G/C-1_CCTTGAA	7	FALSE	FALSE
12_v.txt	31957	31957-Deletion-T--	Deletion	1	T	-	1	16625	0.00602	38	rnr1D57N	FALSE	CAN	JSY14	1	rnr1D57N-Rep1	GTG	nope	>1bp-ins	A/T-1	none	A/T-1	TAAATGTGGCCGC	TGGCCGC	CAC	GTG	T	none	nope	nope_GTG	A/T-1_TGGCCGC	7	FALSE	FALSE
12_v.txt	31972	31972-Deletion-C--	Deletion	1	C	-	7	16625	0.0421053	31.2857	rnr1D57N	FALSE	CAN	JSY14	1	rnr1D57N-Rep1	GCC	nope	>1bp-ins	G/C-1	none	G/C-1	AATAAGCCAAGCC	CCAAGCC	CGG	GCC	C	none	nope	nope_GCC	G/C-1_CCAAGCC	7	FALSE	FALSE
12_v.txt	31976	31976-Deletion-G--	Deletion	1	G	-	9	16625	0.0541353	46.6667	rnr1D57N	FALSE	CAN	JSY14	1	rnr1D57N-Rep1	AGC	nope	>1bp-ins	G/C-1	none	G/C-1	AGCCAAGCCGGGC	GCCGGGC	TCG	TCG	C	none	C>none	C>none_TCG	G/C-1_GCCGGGC	7	FALSE	FALSE
12_v.txt	32075	32075-Deletion-C--	Deletion	1	C	-	5	16625	0.0300752	64	rnr1D57N	FALSE	CAN	JSY14	1	rnr1D57N-Rep1	ACC	nope	>1bp-ins	G/C-1	none	G/C-1	AAATAACCATGCA	CCATGCA	TGG	ACC	C	none	nope	nope_ACC	G/C-1_CCATGCA	7	FALSE	FALSE
12_v.txt	32079	32079-Deletion-G--	Deletion	1	G	-	4	16625	0.0240601	64	rnr1D57N	FALSE	CAN	JSY14	1	rnr1D57N-Rep1	TGC	nope	>1bp-ins	G/C-1	none	G/C-1	AACCATGCAAAAA	GCAAAAA	ACG	ACG	C	none	C>none	C>none_ACG	G/C-1_GCAAAAA	7	FALSE	FALSE
12_v.txt	32081	32081-Deletion-A--	Deletion	1	A	-	32	16624	0.192493	63.9063	rnr1D57N	FALSE	CAN	JSY14	1	rnr1D57N-Rep1	CAA	nope	>1bp-ins	A/T-1	none	A/T-1	CCATGCAAAAAAG	AAAAAAG	GTT	GTT	T	none	T>none	T>none_GTT	A/T-1_AAAAAAG	7	FALSE	FALSE
12_v.txt	32095	32095-Deletion-C--	Deletion	1	C	-	4	16625	0.0240601	64	rnr1D57N	FALSE	CAN	JSY14	1	rnr1D57N-Rep1	ACA	nope	>1bp-ins	G/C-1	none	G/C-1	CTGCAACACCAGT	CACCAGT	TGT	ACA	C	none	nope	nope_ACA	G/C-1_CACCAGT	7	FALSE	FALSE
12_v.txt	32097	32097-Deletion-C--	Deletion	1	C	-	5	16625	0.0300752	58.8	rnr1D57N	FALSE	CAN	JSY14	1	rnr1D57N-Rep1	ACC	nope	>1bp-ins	G/C-1	none	G/C-1	GCAACACCAGTGA	CCAGTGA	TGG	ACC	C	none	nope	nope_ACC	G/C-1_CCAGTGA	7	FALSE	FALSE
12_v.txt	32148	32148-Deletion-T--	Deletion	1	T	-	12	16625	0.0721805	50.6667	rnr1D57N	FALSE	CAN	JSY14	1	rnr1D57N-Rep1	CTC	nope	>1bp-ins	A/T-1	none	A/T-1	GATGTCTCCATGT	TCCATGT	GAG	CTC	T	none	nope	nope_CTC	A/T-1_TCCATGT	7	FALSE	FALSE
12_v.txt	32149	32149-Deletion-C--	Deletion	1	C	-	2	16625	0.0120301	64	rnr1D57N	FALSE	CAN	JSY14	1	rnr1D57N-Rep1	TCC	nope	>1bp-ins	G/C-1	none	G/C-1	ATGTCTCCATGTA	CCATGTA	AGG	TCC	C	none	nope	nope_TCC	G/C-1_CCATGTA	7	FALSE	FALSE
12_v.txt	32165	32165-Deletion-G--	Deletion	1	G	-	43	16625	0.258647	47.2325	rnr1D57N	FALSE	CAN	JSY14	1	rnr1D57N-Rep1	CGC	nope	>1bp-ins	G/C-1	none	G/C-1	CAAAGCGCCAAAT	GCCAAAT	GCG	GCG	C	none	C>none	C>none_GCG	G/C-1_GCCAAAT	7	FALSE	FALSE
12_v.txt	32237	32237-Deletion-A--	Deletion	1	A	-	260	16623	1.5641	37.2731	rnr1D57N	FALSE	CAN	JSY14	1	rnr1D57N-Rep1	GAG	nope	>1bp-ins	A/T-1	none	A/T-1	TTTAGGAGCCAAC	AGCCAAC	CTC	CTC	T	none	T>none	T>none_CTC	A/T-1_AGCCAAC	7	FALSE	FALSE
12_v.txt	32259	32259-Deletion-C--	Deletion	1	C	-	14	29224	0.0479058	37.7857	rnr1D57N	FALSE	CAN	JSY14	1	rnr1D57N-Rep1	ACC	nope	>1bp-ins	G/C-1	none	G/C-1	GATAGACCAAATA	CCAAATA	TGG	ACC	C	none	nope	nope_ACC	G/C-1_CCAAATA	7	FALSE	FALSE
12_v.txt	32284	32284-Deletion-A--	Deletion	1	A	-	5	29225	0.0171086	53.6	rnr1D57N	FALSE	CAN	JSY14	1	rnr1D57N-Rep1	TAA	nope	>1bp-ins	A/T-1	none	A/T-1	CAACGTAAATATT	AAATATT	ATT	ATT	T	none	T>none	T>none_ATT	A/T-1_AAATATT	7	FALSE	FALSE
12_v.txt	32313	32313-Deletion-G--	Deletion	1	G	-	2	29225	0.00684	64	rnr1D57N	FALSE	CAN	JSY14	1	rnr1D57N-Rep1	GGT	nope	>1bp-ins	G/C-1	none	G/C-1	ATAATGGTTGTTA	GTTGTTA	CCA	CCA	C	none	C>none	C>none_CCA	G/C-1_GTTGTTA	7	FALSE	FALSE
12_v.txt	32346	32346-Deletion-A--	Deletion	1	A	-	86	29223	0.294289	61.1977	rnr1D57N	FALSE	CAN	JSY14	1	rnr1D57N-Rep1	CAA	nope	>1bp-ins	A/T-1	none	A/T-1	TGTGGCAAAACCT	AAAACCT	GTT	GTT	T	none	T>none	T>none_GTT	A/T-1_AAAACCT	7	FALSE	FALSE
12_v.txt	32494	32494-Deletion-C--	Deletion	1	C	-	1	29224	0.00342	64	rnr1D57N	FALSE	CAN	JSY14	1	rnr1D57N-Rep1	ACA	nope	>1bp-ins	G/C-1	none	G/C-1	GGAAAACAACTTT	CAACTTT	TGT	ACA	C	none	nope	nope_ACA	G/C-1_CAACTTT	7	FALSE	FALSE
12_v.txt	32498	32498-Deletion-T--	Deletion	1	T	-	138	29225	0.472198	44.8478	rnr1D57N	FALSE	CAN	JSY14	1	rnr1D57N-Rep1	CTT	nope	>1bp-ins	A/T-1	none	A/T-1	AACAACTTTTTTG	TTTTTTG	GAA	CTT	T	none	nope	nope_CTT	A/T-1_TTTTTTG	7	FALSE	FALSE
12_v.txt	32544	32544-Deletion-C--	Deletion	1	C	-	3	29224	0.0102655	37.3333	rnr1D57N	FALSE	CAN	JSY14	1	rnr1D57N-Rep1	ACC	nope	>1bp-ins	G/C-1	none	G/C-1	GCTTCACCAGCAG	CCAGCAG	TGG	ACC	C	none	nope	nope_ACC	G/C-1_CCAGCAG	7	FALSE	FALSE
12_v.txt	32581	32581-Deletion-T--	Deletion	1	T	-	15	26053	0.0575749	37.4	rnr1D57N	FALSE	CAN	JSY14	1	rnr1D57N-Rep1	GTG	nope	>1bp-ins	A/T-1	none	A/T-1	GAAATGTGAAGGC	TGAAGGC	CAC	GTG	T	none	nope	nope_GTG	A/T-1_TGAAGGC	7	FALSE	FALSE
12_v.txt	32631	32631-Deletion-T--	Deletion	1	T	-	203	26053	0.779181	51.8177	rnr1D57N	FALSE	CAN	JSY14	1	rnr1D57N-Rep1	GTT	nope	>1bp-ins	A/T-1	none	A/T-1	CCTTCGTTTTTAT	TTTTTAT	CAA	GTT	T	none	nope	nope_GTT	A/T-1_TTTTTAT	7	FALSE	FALSE
12_v.txt	32657	32657-Deletion-A--	Deletion	1	A	-	45	26053	0.172725	56.2445	rnr1D57N	FALSE	CAN	JSY14	1	rnr1D57N-Rep1	GAC	nope	>1bp-ins	A/T-1	none	A/T-1	ACCTGGACCCCAG	ACCCCAG	CTG	CTG	T	none	T>none	T>none_CTG	A/T-1_ACCCCAG	7	FALSE	FALSE
12_v.txt	32658	32658-Deletion-C--	Deletion	1	C	-	110	26053	0.422216	62.3364	rnr1D57N	FALSE	CAN	JSY14	1	rnr1D57N-Rep1	ACC	nope	>1bp-ins	G/C-1	none	G/C-1	CCTGGACCCCAGG	CCCCAGG	TGG	ACC	C	none	nope	nope_ACC	G/C-1_CCCCAGG	7	FALSE	FALSE
12_v.txt	32678	32678-Deletion-C--	Deletion	1	C	-	2	26053	0.00768	62	rnr1D57N	FALSE	CAN	JSY14	1	rnr1D57N-Rep1	TCC	nope	>1bp-ins	G/C-1	none	G/C-1	GTTTCTCCAATAA	CCAATAA	AGG	TCC	C	none	nope	nope_TCC	G/C-1_CCAATAA	7	FALSE	FALSE
12_v.txt	32682	32682-Deletion-T--	Deletion	1	T	-	14	26053	0.0537366	62.7143	rnr1D57N	FALSE	CAN	JSY14	1	rnr1D57N-Rep1	ATA	nope	>1bp-ins	A/T-1	none	A/T-1	CTCCAATAACGGA	TAACGGA	TAT	ATA	T	none	nope	nope_ATA	A/T-1_TAACGGA	7	FALSE	FALSE
12_v.txt	32728	32728-Deletion-A--	Deletion	1	A	-	52	26053	0.199593	60.6346	rnr1D57N	FALSE	CAN	JSY14	1	rnr1D57N-Rep1	CAA	nope	>1bp-ins	A/T-1	none	A/T-1	CCATACAAAAACA	AAAAACA	GTT	GTT	T	none	T>none	T>none_GTT	A/T-1_AAAAACA	7	FALSE	FALSE
12_v.txt	32758	32758-Deletion-C--	Deletion	1	C	-	6	26053	0.02303	49.5	rnr1D57N	FALSE	CAN	JSY14	1	rnr1D57N-Rep1	GCT	nope	>1bp-ins	G/C-1	none	G/C-1	TAATGGCTAAAAC	CTAAAAC	CGA	GCT	C	none	nope	nope_GCT	G/C-1_CTAAAAC	7	FALSE	FALSE
12_v.txt	32759	32759-Deletion-T--	Deletion	1	T	-	23	26053	0.0882816	51.8696	rnr1D57N	FALSE	CAN	JSY14	1	rnr1D57N-Rep1	CTA	nope	>1bp-ins	A/T-1	none	A/T-1	AATGGCTAAAACT	TAAAACT	GAT	CTA	T	none	nope	nope_CTA	A/T-1_TAAAACT	7	FALSE	FALSE
12_v.txt	32760	32760-Deletion-A--	Deletion	1	A	-	2	26053	0.00768	64	rnr1D57N	FALSE	CAN	JSY14	1	rnr1D57N-Rep1	TAA	nope	>1bp-ins	A/T-1	none	A/T-1	ATGGCTAAAACTT	AAAACTT	ATT	ATT	T	none	T>none	T>none_ATT	A/T-1_AAAACTT	7	FALSE	FALSE
12_v.txt	32779	32779-Deletion-C--	Deletion	1	C	-	7	26053	0.0268683	56.5714	rnr1D57N	FALSE	CAN	JSY14	1	rnr1D57N-Rep1	ACC	nope	>1bp-ins	G/C-1	none	G/C-1	AAGCGACCCAGAA	CCCAGAA	TGG	ACC	C	none	nope	nope_ACC	G/C-1_CCCAGAA	7	FALSE	FALSE
12_v.txt	32839	32839-Deletion-C--	Deletion	1	C	-	9	26053	0.034545	39.8889	rnr1D57N	FALSE	CAN	JSY14	1	rnr1D57N-Rep1	ACC	nope	>1bp-ins	G/C-1	none	G/C-1	TAATTACCCAAAA	CCCAAAA	TGG	ACC	C	none	nope	nope_ACC	G/C-1_CCCAAAA	7	FALSE	FALSE
12_v.txt	32842	32842-Deletion-A--	Deletion	1	A	-	1113	26053	4.27206	41.7161	rnr1D57N	FALSE	CAN	JSY14	1	rnr1D57N-Rep1	CAA	nope	>1bp-ins	A/T-1	none	A/T-1	TTACCCAAAAAAT	AAAAAAT	GTT	GTT	T	none	T>none	T>none_GTT	A/T-1_AAAAAAT	7	FALSE	FALSE
12_v.txt	32884	32884-Deletion-A--	Deletion	1	A	-	9	21315	0.0422238	37.2222	rnr1D57N	FALSE	CAN	JSY14	1	rnr1D57N-Rep1	CAA	nope	>1bp-ins	A/T-1	none	A/T-1	ACGTCCAAAATTG	AAAATTG	GTT	GTT	T	none	T>none	T>none_GTT	A/T-1_AAAATTG	7	FALSE	FALSE
12_v.txt	32901	32901-Deletion-C--	Deletion	1	C	-	1	21315	0.00469	38	rnr1D57N	FALSE	CAN	JSY14	1	rnr1D57N-Rep1	GCC	nope	>1bp-ins	G/C-1	none	G/C-1	ACTTGGCCAACTA	CCAACTA	CGG	GCC	C	none	nope	nope_GCC	G/C-1_CCAACTA	7	FALSE	FALSE
12_v.txt	32924	32924-Deletion-A--	Deletion	1	A	-	18	21315	0.0844476	58.5	rnr1D57N	FALSE	CAN	JSY14	1	rnr1D57N-Rep1	CAA	nope	>1bp-ins	A/T-1	none	A/T-1	CAGGGCAAAAGTG	AAAAGTG	GTT	GTT	T	none	T>none	T>none_GTT	A/T-1_AAAAGTG	7	FALSE	FALSE
12_v.txt	32935	32935-Deletion-C--	Deletion	1	C	-	21	21315	0.0985222	51.1905	rnr1D57N	FALSE	CAN	JSY14	1	rnr1D57N-Rep1	GCC	nope	>1bp-ins	G/C-1	none	G/C-1	TGATTGCCCAAGA	CCCAAGA	CGG	GCC	C	none	nope	nope_GCC	G/C-1_CCCAAGA	7	FALSE	FALSE
12_v.txt	32958	32958-Deletion-C--	Deletion	1	C	-	2	21315	0.00938	64	rnr1D57N	FALSE	CAN	JSY14	1	rnr1D57N-Rep1	ACC	nope	>1bp-ins	G/C-1	none	G/C-1	ATGTAACCATTGG	CCATTGG	TGG	ACC	C	none	nope	nope_ACC	G/C-1_CCATTGG	7	FALSE	FALSE
12_v.txt	32970	32970-Deletion-C--	Deletion	1	C	-	3	21314	0.0140753	52	rnr1D57N	FALSE	CAN	JSY14	1	rnr1D57N-Rep1	ACC	nope	>1bp-ins	G/C-1	none	G/C-1	GCCGCACCAAATG	CCAAATG	TGG	ACC	C	none	nope	nope_ACC	G/C-1_CCAAATG	7	FALSE	FALSE
12_v.txt	32972	32972-Deletion-A--	Deletion	1	A	-	13	21314	0.0609928	62.6923	rnr1D57N	FALSE	CAN	JSY14	1	rnr1D57N-Rep1	CAA	nope	>1bp-ins	A/T-1	none	A/T-1	CGCACCAAATGCT	AAATGCT	GTT	GTT	T	none	T>none	T>none_GTT	A/T-1_AAATGCT	7	FALSE	FALSE
12_v.txt	33000	33000-Deletion-A--	Deletion	1	A	-	68	21315	0.319024	62.1765	rnr1D57N	FALSE	CAN	JSY14	1	rnr1D57N-Rep1	GAA	nope	>1bp-ins	A/T-1	none	A/T-1	TGTGAGAAAACTG	AAAACTG	CTT	CTT	T	none	T>none	T>none_CTT	A/T-1_AAAACTG	7	FALSE	FALSE
12_v.txt	33072	33072-Deletion-A--	Deletion	1	A	-	6	21315	0.0281492	59.3333	rnr1D57N	FALSE	CAN	JSY14	1	rnr1D57N-Rep1	CAA	nope	>1bp-ins	A/T-1	none	A/T-1	TATGCCAAAGAAC	AAAGAAC	GTT	GTT	T	none	T>none	T>none_GTT	A/T-1_AAAGAAC	7	FALSE	FALSE
12_v.txt	33147	33147-Deletion-A--	Deletion	1	A	-	7	21315	0.0328407	38	rnr1D57N	FALSE	CAN	JSY14	1	rnr1D57N-Rep1	GAA	nope	>1bp-ins	A/T-1	none	A/T-1	CCAATGAAAAGAC	AAAAGAC	CTT	CTT	T	none	T>none	T>none_CTT	A/T-1_AAAAGAC	7	FALSE	FALSE
12_v.txt	33168	33168-Deletion-C--	Deletion	1	C	-	2	21296	0.00939	38	rnr1D57N	FALSE	CAN	JSY14	1	rnr1D57N-Rep1	ACC	nope	>1bp-ins	G/C-1	none	G/C-1	ATAGTACCACCAA	CCACCAA	TGG	ACC	C	none	nope	nope_ACC	G/C-1_CCACCAA	7	FALSE	FALSE
12_v.txt	33178	33178-Deletion-C--	Deletion	1	C	-	25	21290	0.117426	38	rnr1D57N	FALSE	CAN	JSY14	1	rnr1D57N-Rep1	GCA	nope	>1bp-ins	G/C-1	none	G/C-1	CAAGGGCAATCAT	CAATCAT	CGT	GCA	C	none	nope	nope_GCA	G/C-1_CAATCAT	7	FALSE	FALSE
12_v.txt	33273	33273-Deletion-A--	Deletion	1	A	-	22	20312	0.10831	50.0909	rnr1D57N	FALSE	CAN	JSY14	1	rnr1D57N-Rep1	GAA	nope	>1bp-ins	A/T-1	none	A/T-1	ATAGAGAACGTAT	AACGTAT	CTT	CTT	T	none	T>none	T>none_CTT	A/T-1_AACGTAT	7	FALSE	FALSE
12_v.txt	33300	33300-Deletion-G--	Deletion	1	G	-	13	20312	0.0640016	59.5385	rnr1D57N	FALSE	CAN	JSY14	1	rnr1D57N-Rep1	CGG	nope	>1bp-ins	G/C-1	none	G/C-1	CTCGTCGGGAAAG	GGGAAAG	GCC	GCC	C	none	C>none	C>none_GCC	G/C-1_GGGAAAG	7	FALSE	FALSE
12_v.txt	33378	33378-Deletion-G--	Deletion	1	G	-	6	20312	0.0295392	59.5	rnr1D57N	FALSE	CAN	JSY14	1	rnr1D57N-Rep1	TGA	nope	>1bp-ins	G/C-1	none	G/C-1	GTTTGTGAAGCTT	GAAGCTT	ACT	ACT	C	none	C>none	C>none_ACT	G/C-1_GAAGCTT	7	FALSE	FALSE
12_v.txt	33452	33452-Deletion-T--	Deletion	1	T	-	6	20312	0.0295392	44.1667	rnr1D57N	FALSE	CAN	JSY14	1	rnr1D57N-Rep1	CTT	nope	>1bp-ins	A/T-1	none	A/T-1	GTCTTCTTTTGAA	TTTTGAA	GAA	CTT	T	none	nope	nope_CTT	A/T-1_TTTTGAA	7	FALSE	FALSE
12_v.txt	33456	33456-Deletion-G--	Deletion	1	G	-	24	20312	0.118157	44	rnr1D57N	FALSE	CAN	JSY14	1	rnr1D57N-Rep1	TGA	nope	>1bp-ins	G/C-1	none	G/C-1	TCTTTTGAATTTG	GAATTTG	ACT	ACT	C	none	C>none	C>none_ACT	G/C-1_GAATTTG	7	FALSE	FALSE
12_v.txt	33474	33474-Deletion-C--	Deletion	1	C	-	38	20311	0.187091	31.4737	rnr1D57N	FALSE	CAN	JSY14	1	rnr1D57N-Rep1	GCC	nope	>1bp-ins	G/C-1	none	G/C-1	GCTATGCCTTTTT	CCTTTTT	CGG	GCC	C	none	nope	nope_GCC	G/C-1_CCTTTTT	7	FALSE	FALSE
13_v.txt	31723	31723-SNV-A-C	SNV	1	A	C	4	5942	0.0673174	43.75	rnr1D57N	FALSE	CAN	JSY14	2	rnr1D57N-Rep2	CAA	A>C	G/C+1	A/T-1	TA>GC	TA>GC	TGTCCCAAAAAGT	AAAAAGT	GTT	GTT	T	G	T>G	T>G_GTT	TA>GC_AAAAAGT	7	FALSE	FALSE
13_v.txt	31950	31950-SNV-A-C	SNV	1	A	C	9	12930	0.0696056	38	rnr1D57N	FALSE	CAN	JSY14	2	rnr1D57N-Rep2	CAT	A>C	G/C+1	A/T-1	TA>GC	TA>GC	ATCGTCATAAATG	ATAAATG	GTA	GTA	T	G	T>G	T>G_GTA	TA>GC_ATAAATG	7	FALSE	FALSE
13_v.txt	32283	32283-SNV-T-G	SNV	1	T	G	587	13617	4.31079	53.8262	rnr1D57N	FALSE	CAN	JSY14	2	rnr1D57N-Rep2	GTA	T>G	G/C+1	A/T-1	TA>GC	TA>GC	CCAACGTAAATAT	TAAATAT	CAT	GTA	T	C	T>G	T>G_GTA	TA>GC_TAAATAT	7	FALSE	FALSE
13_v.txt	32574	32574-SNV-T-G	SNV	1	T	G	14	16747	0.0835971	33.7127	rnr1D57N	FALSE	CAN	JSY14	2	rnr1D57N-Rep2	TTG	T>G	G/C+1	A/T-1	TA>GC	TA>GC	GTACCTTGAAATG	TGAAATG	AAC	TTG	T	C	T>G	T>G_TTG	TA>GC_TGAAATG	7	FALSE	FALSE
13_v.txt	32739	32739-SNV-A-C	SNV	1	A	C	1329	16747	7.93575	55.6606	rnr1D57N	FALSE	CAN	JSY14	2	rnr1D57N-Rep2	TAT	A>C	G/C+1	A/T-1	TA>GC	TA>GC	CAGTATATTAGAA	ATTAGAA	ATA	ATA	T	G	T>G	T>G_ATA	TA>GC_ATTAGAA	7	FALSE	FALSE
13_v.txt	32799	32799-SNV-T-G	SNV	1	T	G	6	16747	0.0358273	38.0023	rnr1D57N	FALSE	CAN	JSY14	2	rnr1D57N-Rep2	GTA	T>G	G/C+1	A/T-1	TA>GC	TA>GC	TCACCGTAATATT	TAATATT	CAT	GTA	T	C	T>G	T>G_GTA	TA>GC_TAATATT	7	FALSE	FALSE
13_v.txt	32817	32817-SNV-A-C	SNV	1	A	C	26	16747	0.155252	42.9615	rnr1D57N	FALSE	CAN	JSY14	2	rnr1D57N-Rep2	CAA	A>C	G/C+1	A/T-1	TA>GC	TA>GC	GGGAACAAGTTCA	AAGTTCA	GTT	GTT	T	G	T>G	T>G_GTT	TA>GC_AAGTTCA	7	FALSE	FALSE
13_v.txt	32842	32842-SNV-A-C	SNV	1	A	C	3	16747	0.0179137	38	rnr1D57N	FALSE	CAN	JSY14	2	rnr1D57N-Rep2	CAA	A>C	G/C+1	A/T-1	TA>GC	TA>GC	TTACCCAAAAAAT	AAAAAAT	GTT	GTT	T	G	T>G	T>G_GTT	TA>GC_AAAAAAT	7	FALSE	FALSE
13_v.txt	33157	33157-SNV-T-G	SNV	1	T	G	10	18234	0.0548426	36.6	rnr1D57N	FALSE	CAN	JSY14	2	rnr1D57N-Rep2	GTA	T>G	G/C+1	A/T-1	TA>GC	TA>GC	GACCTGTACCAAT	TACCAAT	CAT	GTA	T	C	T>G	T>G_GTA	TA>GC_TACCAAT	7	FALSE	FALSE
13_v.txt	33269	33269-SNV-A-C	SNV	1	A	C	71	11356	0.62522	17.169	rnr1D57N	FALSE	CAN	JSY14	2	rnr1D57N-Rep2	TAG	A>C	G/C+1	A/T-1	TA>GC	TA>GC	CTCCATAGAGAAC	AGAGAAC	ATC	ATC	T	G	T>G	T>G_ATC	TA>GC_AGAGAAC	7	FALSE	FALSE
13_v.txt	32583	32583-SNV-A-G	SNV	1	A	G	58	16747	0.346331	37.1207	rnr1D57N	FALSE	CAN	JSY14	2	rnr1D57N-Rep2	GAA	A>G	G/C+1	A/T-1	TA>CG	TA>CG	AATGTGAAGGCAG	AAGGCAG	CTT	CTT	T	C	T>C	T>C_CTT	TA>CG_AAGGCAG	7	FALSE	FALSE
13_v.txt	32842	32842-SNV-A-G	SNV	1	A	G	5	16747	0.0298561	41	rnr1D57N	FALSE	CAN	JSY14	2	rnr1D57N-Rep2	CAA	A>G	G/C+1	A/T-1	TA>CG	TA>CG	TTACCCAAAAAAT	AAAAAAT	GTT	GTT	T	C	T>C	T>C_GTT	TA>CG_AAAAAAT	7	FALSE	FALSE
13_v.txt	32498	32498-SNV-T-A	SNV	1	T	A	2	13616	0.0146886	50.9973	rnr1D57N	FALSE	CAN	JSY14	2	rnr1D57N-Rep2	CTT	T>A	A/T+1	A/T-1	TA>AT	TA>AT	AACAACTTTTTTG	TTTTTTG	GAA	CTT	T	T	T>A	T>A_CTT	TA>AT_TTTTTTG	7	FALSE	FALSE
13_v.txt	32916	32916-SNV-T-A	SNV	1	T	A	23	18234	0.126138	55.5217	rnr1D57N	FALSE	CAN	JSY14	2	rnr1D57N-Rep2	TTC	T>A	A/T+1	A/T-1	TA>AT	TA>AT	CTAAGTTCCAGGG	TCCAGGG	AAG	TTC	T	T	T>A	T>A_TTC	TA>AT_TCCAGGG	7	FALSE	FALSE
13_v.txt	33251	33251-SNV-A-T	SNV	1	A	T	8	11356	0.0704473	23.875	rnr1D57N	FALSE	CAN	JSY14	2	rnr1D57N-Rep2	CAC	A>T	A/T+1	A/T-1	TA>AT	TA>AT	TTCATCACCTATG	ACCTATG	GTG	GTG	T	A	T>A	T>A_GTG	TA>AT_ACCTATG	7	FALSE	FALSE
13_v.txt	31650	31650-SNV-C-T	SNV	1	C	T	12	5942	0.201952	36.1667	rnr1D57N	FALSE	CAN	JSY14	2	rnr1D57N-Rep2	GCG	C>T	A/T+1	G/C-1	CG>TA	CG>TA	AGAATGCGAAATG	CGAAATG	CGC	GCG	C	A	C>T	C>T_GCG	CG>TA_CGAAATG	7	FALSE	FALSE
13_v.txt	31834	31834-SNV-G-A	SNV	1	G	A	13	5942	0.218782	50.1538	rnr1D57N	FALSE	CAN	JSY14	2	rnr1D57N-Rep2	TGA	G>A	A/T+1	G/C-1	CG>TA	CG>TA	TGCATTGAAATAA	GAAATAA	ACT	ACT	C	T	C>T	C>T_ACT	CG>TA_GAAATAA	7	FALSE	FALSE
13_v.txt	31881	31881-SNV-G-A	SNV	1	G	A	10	5942	0.168294	39.8	rnr1D57N	FALSE	CAN	JSY14	2	rnr1D57N-Rep2	GGC	G>A	A/T+1	G/C-1	CG>TA	CG>TA	TAGGCGGCAGCAA	GCAGCAA	CCG	CCG	C	T	C>T	C>T_CCG	CG>TA_GCAGCAA	7	FALSE	FALSE
13_v.txt	32022	32022-SNV-C-T	SNV	1	C	T	21	12931	0.1624	49.619	rnr1D57N	FALSE	CAN	JSY14	2	rnr1D57N-Rep2	GCC	C>T	A/T+1	G/C-1	CG>TA	CG>TA	GAGATGCCACGGT	CCACGGT	CGG	GCC	C	A	C>T	C>T_GCC	CG>TA_CCACGGT	7	FALSE	FALSE
13_v.txt	32075	32075-SNV-C-T	SNV	1	C	T	23	12928	0.177908	60.2601	rnr1D57N	FALSE	CAN	JSY14	2	rnr1D57N-Rep2	ACC	C>T	A/T+1	G/C-1	CG>TA	CG>TA	AAATAACCATGCA	CCATGCA	TGG	ACC	C	A	C>T	C>T_ACC	CG>TA_CCATGCA	7	FALSE	FALSE
13_v.txt	32076	32076-SNV-C-T	SNV	1	C	T	317	12929	2.45185	61.9667	rnr1D57N	FALSE	CAN	JSY14	2	rnr1D57N-Rep2	CCA	C>T	A/T+1	G/C-1	CG>TA	CG>TA	AATAACCATGCAA	CATGCAA	GGT	CCA	C	A	C>T	C>T_CCA	CG>TA_CATGCAA	7	FALSE	FALSE
13_v.txt	32088	32088-SNV-C-T	SNV	1	C	T	36	12931	0.278401	60.9722	rnr1D57N	FALSE	CAN	JSY14	2	rnr1D57N-Rep2	GCC	C>T	A/T+1	G/C-1	CG>TA	CG>TA	AAAAAGCCTGCAA	CCTGCAA	CGG	GCC	C	A	C>T	C>T_GCC	CG>TA_CCTGCAA	7	FALSE	FALSE
13_v.txt	32092	32092-SNV-C-T	SNV	1	C	T	16	12931	0.123734	58.8125	rnr1D57N	FALSE	CAN	JSY14	2	rnr1D57N-Rep2	GCA	C>T	A/T+1	G/C-1	CG>TA	CG>TA	AGCCTGCAACACC	CAACACC	CGT	GCA	C	A	C>T	C>T_GCA	CG>TA_CAACACC	7	FALSE	FALSE
13_v.txt	32165	32165-SNV-G-A	SNV	1	G	A	23	12931	0.177867	45.3913	rnr1D57N	FALSE	CAN	JSY14	2	rnr1D57N-Rep2	CGC	G>A	A/T+1	G/C-1	CG>TA	CG>TA	CAAAGCGCCAAAT	GCCAAAT	GCG	GCG	C	T	C>T	C>T_GCG	CG>TA_GCCAAAT	7	FALSE	FALSE
13_v.txt	32173	32173-SNV-C-T	SNV	1	C	T	17	12931	0.131467	45.4706	rnr1D57N	FALSE	CAN	JSY14	2	rnr1D57N-Rep2	GCA	C>T	A/T+1	G/C-1	CG>TA	CG>TA	CAAATGCAGCAGT	CAGCAGT	CGT	GCA	C	A	C>T	C>T_GCA	CG>TA_CAGCAGT	7	FALSE	FALSE
13_v.txt	32176	32176-SNV-C-T	SNV	1	C	T	15	12931	0.116	48.0667	rnr1D57N	FALSE	CAN	JSY14	2	rnr1D57N-Rep2	GCA	C>T	A/T+1	G/C-1	CG>TA	CG>TA	ATGCAGCAGTAAC	CAGTAAC	CGT	GCA	C	A	C>T	C>T_GCA	CG>TA_CAGTAAC	7	FALSE	FALSE
13_v.txt	32271	32271-SNV-C-T	SNV	1	C	T	24	13617	0.17625	32.4167	rnr1D57N	FALSE	CAN	JSY14	2	rnr1D57N-Rep2	ACG	C>T	A/T+1	G/C-1	CG>TA	CG>TA	AAAATACGGGAAC	CGGGAAC	TGC	ACG	C	A	C>T	C>T_ACG	CG>TA_CGGGAAC	7	FALSE	FALSE
13_v.txt	32299	32299-SNV-C-T	SNV	1	C	T	29	13617	0.212969	58.7931	rnr1D57N	FALSE	CAN	JSY14	2	rnr1D57N-Rep2	GCG	C>T	A/T+1	G/C-1	CG>TA	CG>TA	AATTTGCGGCAGA	CGGCAGA	CGC	GCG	C	A	C>T	C>T_GCG	CG>TA_CGGCAGA	7	FALSE	FALSE
13_v.txt	32449	32449-SNV-C-T	SNV	1	C	T	26	13616	0.190952	51.6154	rnr1D57N	FALSE	CAN	JSY14	2	rnr1D57N-Rep2	CCA	C>T	A/T+1	G/C-1	CG>TA	CG>TA	AAAGTCCAATGAA	CAATGAA	GGT	CCA	C	A	C>T	C>T_CCA	CG>TA_CAATGAA	7	FALSE	FALSE
13_v.txt	32466	32466-SNV-C-T	SNV	1	C	T	23	13616	0.168919	45.4783	rnr1D57N	FALSE	CAN	JSY14	2	rnr1D57N-Rep2	GCC	C>T	A/T+1	G/C-1	CG>TA	CG>TA	AGAGAGCCAATGT	CCAATGT	CGG	GCC	C	A	C>T	C>T_GCC	CG>TA_CCAATGT	7	FALSE	FALSE
13_v.txt	32488	32488-SNV-G-A	SNV	1	G	A	68	13616	0.499412	47.4559	rnr1D57N	FALSE	CAN	JSY14	2	rnr1D57N-Rep2	CGG	G>A	A/T+1	G/C-1	CG>TA	CG>TA	AGATACGGAAAAC	GGAAAAC	GCC	GCC	C	T	C>T	C>T_GCC	CG>TA_GGAAAAC	7	FALSE	FALSE
13_v.txt	32535	32535-SNV-G-A	SNV	1	G	A	18	13616	0.132197	36.5	rnr1D57N	FALSE	CAN	JSY14	2	rnr1D57N-Rep2	TGC	G>A	A/T+1	G/C-1	CG>TA	CG>TA	GGGTTTGCAGCTT	GCAGCTT	ACG	ACG	C	T	C>T	C>T_ACG	CG>TA_GCAGCTT	7	FALSE	FALSE
13_v.txt	32575	32575-SNV-G-A	SNV	1	G	A	39	16747	0.232878	37.4872	rnr1D57N	FALSE	CAN	JSY14	2	rnr1D57N-Rep2	TGA	G>A	A/T+1	G/C-1	CG>TA	CG>TA	TACCTTGAAATGT	GAAATGT	ACT	ACT	C	T	C>T	C>T_ACT	CG>TA_GAAATGT	7	FALSE	FALSE
13_v.txt	32589	32589-SNV-G-A	SNV	1	G	A	3	16747	0.0179137	37.6663	rnr1D57N	FALSE	CAN	JSY14	2	rnr1D57N-Rep2	AGC	G>A	A/T+1	G/C-1	CG>TA	CG>TA	AAGGCAGCGTTAA	GCGTTAA	TCG	TCG	C	T	C>T	C>T_TCG	CG>TA_GCGTTAA	7	FALSE	FALSE
13_v.txt	32590	32590-SNV-C-T	SNV	1	C	T	30	16747	0.179137	36.0994	rnr1D57N	FALSE	CAN	JSY14	2	rnr1D57N-Rep2	GCG	C>T	A/T+1	G/C-1	CG>TA	CG>TA	AGGCAGCGTTAAT	CGTTAAT	CGC	GCG	C	A	C>T	C>T_GCG	CG>TA_CGTTAAT	7	FALSE	FALSE
13_v.txt	32700	32700-SNV-C-T	SNV	1	C	T	27	16747	0.161223	57.2593	rnr1D57N	FALSE	CAN	JSY14	2	rnr1D57N-Rep2	GCC	C>T	A/T+1	G/C-1	CG>TA	CG>TA	ACTGGGCCGGTAA	CCGGTAA	CGG	GCC	C	A	C>T	C>T_GCC	CG>TA_CCGGTAA	7	FALSE	FALSE
13_v.txt	32776	32776-SNV-C-T	SNV	1	C	T	19	16747	0.113453	46.1053	rnr1D57N	FALSE	CAN	JSY14	2	rnr1D57N-Rep2	GCG	C>T	A/T+1	G/C-1	CG>TA	CG>TA	TGGAAGCGACCCA	CGACCCA	CGC	GCG	C	A	C>T	C>T_GCG	CG>TA_CGACCCA	7	FALSE	FALSE
13_v.txt	32798	32798-SNV-G-A	SNV	1	G	A	27	16747	0.161223	50.7031	rnr1D57N	FALSE	CAN	JSY14	2	rnr1D57N-Rep2	CGT	G>A	A/T+1	G/C-1	CG>TA	CG>TA	TTCACCGTAATAT	GTAATAT	GCA	GCA	C	T	C>T	C>T_GCA	CG>TA_GTAATAT	7	FALSE	FALSE
13_v.txt	32811	32811-SNV-G-A	SNV	1	G	A	16	16747	0.0955395	48.313	rnr1D57N	FALSE	CAN	JSY14	2	rnr1D57N-Rep2	AGG	G>A	A/T+1	G/C-1	CG>TA	CG>TA	TTGACAGGGAACA	GGGAACA	TCC	TCC	C	T	C>T	C>T_TCC	CG>TA_GGGAACA	7	FALSE	FALSE
13_v.txt	32900	32900-SNV-G-A	SNV	1	G	A	28	18234	0.153559	36.9239	rnr1D57N	FALSE	CAN	JSY14	2	rnr1D57N-Rep2	GGC	G>A	A/T+1	G/C-1	CG>TA	CG>TA	GACTTGGCCAACT	GCCAACT	CCG	CCG	C	T	C>T	C>T_CCG	CG>TA_GCCAACT	7	FALSE	FALSE
13_v.txt	32901	32901-SNV-C-T	SNV	1	C	T	45	18234	0.246792	30.9338	rnr1D57N	FALSE	CAN	JSY14	2	rnr1D57N-Rep2	GCC	C>T	A/T+1	G/C-1	CG>TA	CG>TA	ACTTGGCCAACTA	CCAACTA	CGG	GCC	C	A	C>T	C>T_GCC	CG>TA_CCAACTA	7	FALSE	FALSE
13_v.txt	32965	32965-SNV-C-T	SNV	1	C	T	23	18234	0.126138	62	rnr1D57N	FALSE	CAN	JSY14	2	rnr1D57N-Rep2	GCC	C>T	A/T+1	G/C-1	CG>TA	CG>TA	CATTGGCCGCACC	CCGCACC	CGG	GCC	C	A	C>T	C>T_GCC	CG>TA_CCGCACC	7	FALSE	FALSE
13_v.txt	32967	32967-SNV-G-A	SNV	1	G	A	44	18234	0.241307	60.8182	rnr1D57N	FALSE	CAN	JSY14	2	rnr1D57N-Rep2	CGC	G>A	A/T+1	G/C-1	CG>TA	CG>TA	TTGGCCGCACCAA	GCACCAA	GCG	GCG	C	T	C>T	C>T_GCG	CG>TA_GCACCAA	7	FALSE	FALSE
13_v.txt	33056	33056-SNV-C-T	SNV	1	C	T	22	18234	0.120654	50.9091	rnr1D57N	FALSE	CAN	JSY14	2	rnr1D57N-Rep2	GCG	C>T	A/T+1	G/C-1	CG>TA	CG>TA	GGACTGCGTGACA	CGTGACA	CGC	GCG	C	A	C>T	C>T_GCG	CG>TA_CGTGACA	7	FALSE	FALSE
13_v.txt	33070	33070-SNV-C-T	SNV	1	C	T	14	18234	0.0767796	58.3571	rnr1D57N	FALSE	CAN	JSY14	2	rnr1D57N-Rep2	GCC	C>T	A/T+1	G/C-1	CG>TA	CG>TA	AATATGCCAAAGA	CCAAAGA	CGG	GCC	C	A	C>T	C>T_GCC	CG>TA_CCAAAGA	7	FALSE	FALSE
13_v.txt	33104	33104-SNV-G-A	SNV	1	G	A	27	18234	0.148075	42.4074	rnr1D57N	FALSE	CAN	JSY14	2	rnr1D57N-Rep2	CGC	G>A	A/T+1	G/C-1	CG>TA	CG>TA	AAGAGCGCCCACT	GCCCACT	GCG	GCG	C	T	C>T	C>T_GCG	CG>TA_GCCCACT	7	FALSE	FALSE
13_v.txt	33111	33111-SNV-G-A	SNV	1	G	A	21	18234	0.115169	40.619	rnr1D57N	FALSE	CAN	JSY14	2	rnr1D57N-Rep2	TGG	G>A	A/T+1	G/C-1	CG>TA	CG>TA	CCCACTGGGCCGG	GGGCCGG	ACC	ACC	C	T	C>T	C>T_ACC	CG>TA_GGGCCGG	7	FALSE	FALSE
13_v.txt	33114	33114-SNV-C-T	SNV	1	C	T	28	18234	0.153559	43.1429	rnr1D57N	FALSE	CAN	JSY14	2	rnr1D57N-Rep2	GCC	C>T	A/T+1	G/C-1	CG>TA	CG>TA	ACTGGGCCGGCGT	CCGGCGT	CGG	GCC	C	A	C>T	C>T_GCC	CG>TA_CCGGCGT	7	FALSE	FALSE
13_v.txt	33276	33276-SNV-G-A	SNV	1	G	A	21	11356	0.184924	49	rnr1D57N	FALSE	CAN	JSY14	2	rnr1D57N-Rep2	CGT	G>A	A/T+1	G/C-1	CG>TA	CG>TA	GAGAACGTATCCT	GTATCCT	GCA	GCA	C	T	C>T	C>T_GCA	CG>TA_GTATCCT	7	FALSE	FALSE
13_v.txt	33310	33310-SNV-G-A	SNV	1	G	A	17	11356	0.149701	53.3529	rnr1D57N	FALSE	CAN	JSY14	2	rnr1D57N-Rep2	CGC	G>A	A/T+1	G/C-1	CG>TA	CG>TA	AAGAGCGCAATGG	GCAATGG	GCG	GCG	C	T	C>T	C>T_GCG	CG>TA_GCAATGG	7	FALSE	FALSE
13_v.txt	33412	33412-SNV-G-A	SNV	1	G	A	18	11356	0.158507	46.3889	rnr1D57N	FALSE	CAN	JSY14	2	rnr1D57N-Rep2	GGC	G>A	A/T+1	G/C-1	CG>TA	CG>TA	TGACCGGCTCATT	GCTCATT	CCG	CCG	C	T	C>T	C>T_CCG	CG>TA_GCTCATT	7	FALSE	FALSE
13_v.txt	33474	33474-SNV-C-T	SNV	1	C	T	15	11356	0.132089	35	rnr1D57N	FALSE	CAN	JSY14	2	rnr1D57N-Rep2	GCC	C>T	A/T+1	G/C-1	CG>TA	CG>TA	GCTATGCCTTTTT	CCTTTTT	CGG	GCC	C	A	C>T	C>T_GCC	CG>TA_CCTTTTT	7	FALSE	FALSE
13_v.txt	32271	32271-SNV-C-G	SNV	1	C	G	23	13617	0.168907	36.2174	rnr1D57N	FALSE	CAN	JSY14	2	rnr1D57N-Rep2	ACG	C>G	G/C+1	G/C-1	CG>GC	CG>GC	AAAATACGGGAAC	CGGGAAC	TGC	ACG	C	C	C>G	C>G_ACG	CG>GC_CGGGAAC	7	FALSE	FALSE
13_v.txt	32278	32278-SNV-C-G	SNV	1	C	G	7	13617	0.0514063	37.8571	rnr1D57N	FALSE	CAN	JSY14	2	rnr1D57N-Rep2	CCA	C>G	G/C+1	G/C-1	CG>GC	CG>GC	GGGAACCAACGTA	CAACGTA	GGT	CCA	C	C	C>G	C>G_CCA	CG>GC_CAACGTA	7	FALSE	FALSE
13_v.txt	32783	32783-SNV-G-C	SNV	1	G	C	3	16747	0.0179137	37.6667	rnr1D57N	FALSE	CAN	JSY14	2	rnr1D57N-Rep2	AGA	G>C	G/C+1	G/C-1	CG>GC	CG>GC	GACCCAGAACTCG	GAACTCG	TCT	TCT	C	G	C>G	C>G_TCT	CG>GC_GAACTCG	7	FALSE	FALSE
13_v.txt	33070	33070-SNV-C-G	SNV	1	C	G	13	18234	0.0712954	55.4615	rnr1D57N	FALSE	CAN	JSY14	2	rnr1D57N-Rep2	GCC	C>G	G/C+1	G/C-1	CG>GC	CG>GC	AATATGCCAAAGA	CCAAAGA	CGG	GCC	C	C	C>G	C>G_GCC	CG>GC_CCAAAGA	7	FALSE	FALSE
13_v.txt	33172	33172-SNV-C-G	SNV	1	C	G	32	18233	0.175506	37.9688	rnr1D57N	FALSE	CAN	JSY14	2	rnr1D57N-Rep2	CCA	C>G	G/C+1	G/C-1	CG>GC	CG>GC	TACCACCAAGGGC	CAAGGGC	GGT	CCA	C	C	C>G	C>G_CCA	CG>GC_CAAGGGC	7	FALSE	FALSE
13_v.txt	31657	31657-SNV-G-T	SNV	1	G	T	58	5942	0.976102	19.4655	rnr1D57N	FALSE	CAN	JSY14	2	rnr1D57N-Rep2	GGC	G>T	A/T+1	G/C-1	CG>AT	CG>AT	GAAATGGCGTGGA	GCGTGGA	CCG	CCG	C	A	C>A	C>A_CCG	CG>AT_GCGTGGA	7	FALSE	FALSE
13_v.txt	32008	32008-SNV-C-A	SNV	1	C	A	1398	12931	10.8112	57.7361	rnr1D57N	FALSE	CAN	JSY14	2	rnr1D57N-Rep2	TCG	C>A	A/T+1	G/C-1	CG>AT	CG>AT	GTAACTCGTCACG	CGTCACG	AGC	TCG	C	T	C>A	C>A_TCG	CG>AT_CGTCACG	7	FALSE	FALSE
13_v.txt	32119	32119-SNV-C-A	SNV	1	C	A	145	12931	1.12134	58.6138	rnr1D57N	FALSE	CAN	JSY14	2	rnr1D57N-Rep2	TCG	C>A	A/T+1	G/C-1	CG>AT	CG>AT	GCCATTCGAAAAC	CGAAAAC	AGC	TCG	C	T	C>A	C>A_TCG	CG>AT_CGAAAAC	7	FALSE	FALSE
13_v.txt	32205	32205-SNV-C-A	SNV	1	C	A	79	12931	0.610935	39	rnr1D57N	FALSE	CAN	JSY14	2	rnr1D57N-Rep2	ACC	C>A	A/T+1	G/C-1	CG>AT	CG>AT	GGAACACCACCTT	CCACCTT	TGG	ACC	C	T	C>A	C>A_ACC	CG>AT_CCACCTT	7	FALSE	FALSE
13_v.txt	32399	32399-SNV-G-T	SNV	1	G	T	8	13617	0.0587501	63.5	rnr1D57N	FALSE	CAN	JSY14	2	rnr1D57N-Rep2	CGT	G>T	A/T+1	G/C-1	CG>AT	CG>AT	AGAAACGTAGGAA	GTAGGAA	GCA	GCA	C	A	C>A	C>A_GCA	CG>AT_GTAGGAA	7	FALSE	FALSE
13_v.txt	32575	32575-SNV-G-T	SNV	1	G	T	8	16747	0.0477697	30	rnr1D57N	FALSE	CAN	JSY14	2	rnr1D57N-Rep2	TGA	G>T	A/T+1	G/C-1	CG>AT	CG>AT	TACCTTGAAATGT	GAAATGT	ACT	ACT	C	A	C>A	C>A_ACT	CG>AT_GAAATGT	7	FALSE	FALSE
13_v.txt	32783	32783-SNV-G-T	SNV	1	G	T	7	16747	0.0417985	49.2857	rnr1D57N	FALSE	CAN	JSY14	2	rnr1D57N-Rep2	AGA	G>T	A/T+1	G/C-1	CG>AT	CG>AT	GACCCAGAACTCG	GAACTCG	TCT	TCT	C	A	C>A	C>A_TCT	CG>AT_GAACTCG	7	FALSE	FALSE
13_v.txt	32811	32811-SNV-G-T	SNV	1	G	T	5	16747	0.0298561	37.6008	rnr1D57N	FALSE	CAN	JSY14	2	rnr1D57N-Rep2	AGG	G>T	A/T+1	G/C-1	CG>AT	CG>AT	TTGACAGGGAACA	GGGAACA	TCC	TCC	C	A	C>A	C>A_TCC	CG>AT_GGGAACA	7	FALSE	FALSE
13_v.txt	33006	33006-SNV-G-T	SNV	1	G	T	10	18234	0.0548426	63.9	rnr1D57N	FALSE	CAN	JSY14	2	rnr1D57N-Rep2	TGT	G>T	A/T+1	G/C-1	CG>AT	CG>AT	AAAACTGTGAAAG	GTGAAAG	ACA	ACA	C	A	C>A	C>A_ACA	CG>AT_GTGAAAG	7	FALSE	FALSE
13_v.txt	33033	33033-SNV-G-T	SNV	1	G	T	15	18234	0.0822639	59.6	rnr1D57N	FALSE	CAN	JSY14	2	rnr1D57N-Rep2	TGT	G>T	A/T+1	G/C-1	CG>AT	CG>AT	ATGAATGTAGCCA	GTAGCCA	ACA	ACA	C	A	C>A	C>A_ACA	CG>AT_GTAGCCA	7	FALSE	FALSE
13_v.txt	33043	33043-SNV-C-A	SNV	1	C	A	50	18234	0.274213	57.82	rnr1D57N	FALSE	CAN	JSY14	2	rnr1D57N-Rep2	TCA	C>A	A/T+1	G/C-1	CG>AT	CG>AT	CCATTTCACCCAA	CACCCAA	AGT	TCA	C	T	C>A	C>A_TCA	CG>AT_CACCCAA	7	FALSE	FALSE
13_v.txt	33153	33153-SNV-C-A	SNV	1	C	A	81	18234	0.444225	41	rnr1D57N	FALSE	CAN	JSY14	2	rnr1D57N-Rep2	ACC	C>A	A/T+1	G/C-1	CG>AT	CG>AT	AAAAGACCTGTAC	CCTGTAC	TGG	ACC	C	T	C>A	C>A_ACC	CG>AT_CCTGTAC	7	FALSE	FALSE
13_v.txt	33159	33159-SNV-C-A	SNV	1	C	A	16	18234	0.0877482	37.75	rnr1D57N	FALSE	CAN	JSY14	2	rnr1D57N-Rep2	ACC	C>A	A/T+1	G/C-1	CG>AT	CG>AT	CCTGTACCAATAG	CCAATAG	TGG	ACC	C	T	C>A	C>A_ACC	CG>AT_CCAATAG	7	FALSE	FALSE
13_v.txt	33474	33474-SNV-C-A	SNV	1	C	A	34	11356	0.299401	35.2059	rnr1D57N	FALSE	CAN	JSY14	2	rnr1D57N-Rep2	GCC	C>A	A/T+1	G/C-1	CG>AT	CG>AT	GCTATGCCTTTTT	CCTTTTT	CGG	GCC	C	T	C>A	C>A_GCC	CG>AT_CCTTTTT	7	FALSE	FALSE
13_v.txt	33475	33475-SNV-C-A	SNV	1	C	A	13	11356	0.114477	35.3846	rnr1D57N	FALSE	CAN	JSY14	2	rnr1D57N-Rep2	CCT	C>A	A/T+1	G/C-1	CG>AT	CG>AT	CTATGCCTTTTTT	CTTTTTT	GGA	CCT	C	T	C>A	C>A_CCT	CG>AT_CTTTTTT	7	FALSE	FALSE
13_v.txt	32811	32811-Replacement-GGG-CA	Replacement	3	GGG	CA	26	16747	0.155252	44.8333	rnr1D57N	FALSE	CAN	JSY14	2	rnr1D57N-Rep2	AGG	nope	>1bp-ins	>1bpdel	none	Replac.	TTGACAGGGAACA	GGGAACA	TCC	AGG	GGG	none	NA	NA_AGG	Replac._GGGAACA	7	FALSE	FALSE
13_v.txt	32081	32081-Insertion---A	Insertion	1	-	A	3	12931	0.0232001	54.6667	rnr1D57N	FALSE	CAN	JSY14	2	rnr1D57N-Rep2	CAA	nope	A/T+1	>1bpdel	none	A/T+1	CCATGCAAAAAAG	AAAAAAG	GTT	CAA	-	T	NA	NA_CAA	A/T+1_AAAAAAG	7	FALSE	FALSE
13_v.txt	32498	32498-Insertion---T	Insertion	1	-	T	2	13616	0.0146886	60	rnr1D57N	FALSE	CAN	JSY14	2	rnr1D57N-Rep2	CTT	nope	A/T+1	>1bpdel	none	A/T+1	AACAACTTTTTTG	TTTTTTG	GAA	CTT	-	A	NA	NA_CTT	A/T+1_TTTTTTG	7	FALSE	FALSE
13_v.txt	32842	32842-Insertion---A	Insertion	1	-	A	29	16747	0.173165	44	rnr1D57N	FALSE	CAN	JSY14	2	rnr1D57N-Rep2	CAA	nope	A/T+1	>1bpdel	none	A/T+1	TTACCCAAAAAAT	AAAAAAT	GTT	CAA	-	T	NA	NA_CAA	A/T+1_AAAAAAT	7	FALSE	FALSE
13_v.txt	32924	32924-Insertion---A	Insertion	1	-	A	2	18234	0.0109685	51	rnr1D57N	FALSE	CAN	JSY14	2	rnr1D57N-Rep2	CAA	nope	A/T+1	>1bpdel	none	A/T+1	CAGGGCAAAAGTG	AAAAGTG	GTT	CAA	-	T	NA	NA_CAA	A/T+1_AAAAGTG	7	FALSE	FALSE
13_v.txt	32589	32589-Deletion-GC--	Deletion	2	GC	-	5	16747	0.0298561	38	rnr1D57N	FALSE	CAN	JSY14	2	rnr1D57N-Rep2	AGC	nope	>1bp-ins	>1bpdel	none	>1bpdel	AAGGCAGCGTTAA	GCGTTAA	TCG	AGC	GC	none	NA	NA_AGC	>1bpdel_GCGTTAA	7	FALSE	FALSE
13_v.txt	31663	31663-Deletion-A--	Deletion	1	A	-	6	5942	0.100976	33.8333	rnr1D57N	FALSE	CAN	JSY14	2	rnr1D57N-Rep2	GAA	nope	>1bp-ins	A/T-1	none	A/T-1	GCGTGGAAATGTG	AAATGTG	CTT	CTT	T	none	T>none	T>none_CTT	A/T-1_AAATGTG	7	FALSE	FALSE
13_v.txt	31723	31723-Deletion-A--	Deletion	1	A	-	8	5942	0.134635	60.25	rnr1D57N	FALSE	CAN	JSY14	2	rnr1D57N-Rep2	CAA	nope	>1bp-ins	A/T-1	none	A/T-1	TGTCCCAAAAAGT	AAAAAGT	GTT	GTT	T	none	T>none	T>none_GTT	A/T-1_AAAAAGT	7	FALSE	FALSE
13_v.txt	31731	31731-Deletion-T--	Deletion	1	T	-	4	5942	0.0673174	64	rnr1D57N	FALSE	CAN	JSY14	2	rnr1D57N-Rep2	CTT	nope	>1bp-ins	A/T-1	none	A/T-1	AAAGTCTTTGGTT	TTTGGTT	GAA	CTT	T	none	nope	nope_CTT	A/T-1_TTTGGTT	7	FALSE	FALSE
13_v.txt	31904	31904-Deletion-T--	Deletion	1	T	-	5	5942	0.0841468	43.2	rnr1D57N	FALSE	CAN	JSY14	2	rnr1D57N-Rep2	ATT	nope	>1bp-ins	A/T-1	none	A/T-1	ATTGAATTTTGGT	TTTTGGT	TAA	ATT	T	none	nope	nope_ATT	A/T-1_TTTTGGT	7	FALSE	FALSE
13_v.txt	31913	31913-Deletion-A--	Deletion	1	A	-	4	5942	0.0673174	38	rnr1D57N	FALSE	CAN	JSY14	2	rnr1D57N-Rep2	CAA	nope	>1bp-ins	A/T-1	none	A/T-1	TGGTGCAAAAGCC	AAAAGCC	GTT	GTT	T	none	T>none	T>none_GTT	A/T-1_AAAAGCC	7	FALSE	FALSE
13_v.txt	31971	31971-Deletion-G--	Deletion	1	G	-	7707	12931	59.601	37.3145	rnr1D57N	FALSE	CAN	JSY14	2	rnr1D57N-Rep2	AGC	nope	>1bp-ins	G/C-1	none	G/C-1	TAATAAGCCAAGC	GCCAAGC	TCG	TCG	C	none	C>none	C>none_TCG	G/C-1_GCCAAGC	7	FALSE	FALSE
13_v.txt	32075	32075-Deletion-C--	Deletion	1	C	-	2	12928	0.0154703	64	rnr1D57N	FALSE	CAN	JSY14	2	rnr1D57N-Rep2	ACC	nope	>1bp-ins	G/C-1	none	G/C-1	AAATAACCATGCA	CCATGCA	TGG	ACC	C	none	nope	nope_ACC	G/C-1_CCATGCA	7	FALSE	FALSE
13_v.txt	32081	32081-Deletion-A--	Deletion	1	A	-	13	12930	0.100541	61.3846	rnr1D57N	FALSE	CAN	JSY14	2	rnr1D57N-Rep2	CAA	nope	>1bp-ins	A/T-1	none	A/T-1	CCATGCAAAAAAG	AAAAAAG	GTT	GTT	T	none	T>none	T>none_GTT	A/T-1_AAAAAAG	7	FALSE	FALSE
13_v.txt	32381	32381-Deletion-A--	Deletion	1	A	-	8	13617	0.0587501	56.375	rnr1D57N	FALSE	CAN	JSY14	2	rnr1D57N-Rep2	TAA	nope	>1bp-ins	A/T-1	none	A/T-1	AATAATAAAGGGA	AAAGGGA	ATT	ATT	T	none	T>none	T>none_ATT	A/T-1_AAAGGGA	7	FALSE	FALSE
13_v.txt	32498	32498-Deletion-T--	Deletion	1	T	-	17	13616	0.124853	42.9412	rnr1D57N	FALSE	CAN	JSY14	2	rnr1D57N-Rep2	CTT	nope	>1bp-ins	A/T-1	none	A/T-1	AACAACTTTTTTG	TTTTTTG	GAA	CTT	T	none	nope	nope_CTT	A/T-1_TTTTTTG	7	FALSE	FALSE
13_v.txt	32583	32583-Deletion-A--	Deletion	1	A	-	2	16747	0.0119424	38	rnr1D57N	FALSE	CAN	JSY14	2	rnr1D57N-Rep2	GAA	nope	>1bp-ins	A/T-1	none	A/T-1	AATGTGAAGGCAG	AAGGCAG	CTT	CTT	T	none	T>none	T>none_CTT	A/T-1_AAGGCAG	7	FALSE	FALSE
13_v.txt	32631	32631-Deletion-T--	Deletion	1	T	-	10	16747	0.0597122	47	rnr1D57N	FALSE	CAN	JSY14	2	rnr1D57N-Rep2	GTT	nope	>1bp-ins	A/T-1	none	A/T-1	CCTTCGTTTTTAT	TTTTTAT	CAA	GTT	T	none	nope	nope_GTT	A/T-1_TTTTTAT	7	FALSE	FALSE
13_v.txt	32658	32658-Deletion-C--	Deletion	1	C	-	7	16747	0.0417985	59.1429	rnr1D57N	FALSE	CAN	JSY14	2	rnr1D57N-Rep2	ACC	nope	>1bp-ins	G/C-1	none	G/C-1	CCTGGACCCCAGG	CCCCAGG	TGG	ACC	C	none	nope	nope_ACC	G/C-1_CCCCAGG	7	FALSE	FALSE
13_v.txt	32722	32722-Deletion-C--	Deletion	1	C	-	7	16747	0.0417985	64	rnr1D57N	FALSE	CAN	JSY14	2	rnr1D57N-Rep2	ACC	nope	>1bp-ins	G/C-1	none	G/C-1	CACAAACCATACA	CCATACA	TGG	ACC	C	none	nope	nope_ACC	G/C-1_CCATACA	7	FALSE	FALSE
13_v.txt	32744	32744-Deletion-A--	Deletion	1	A	-	7	16747	0.0417985	54.8571	rnr1D57N	FALSE	CAN	JSY14	2	rnr1D57N-Rep2	GAA	nope	>1bp-ins	A/T-1	none	A/T-1	TATTAGAAACCCG	AAACCCG	CTT	CTT	T	none	T>none	T>none_CTT	A/T-1_AAACCCG	7	FALSE	FALSE
13_v.txt	32783	32783-Deletion-G--	Deletion	1	G	-	2	16747	0.0119424	51	rnr1D57N	FALSE	CAN	JSY14	2	rnr1D57N-Rep2	AGA	nope	>1bp-ins	G/C-1	none	G/C-1	GACCCAGAACTCG	GAACTCG	TCT	TCT	C	none	C>none	C>none_TCT	G/C-1_GAACTCG	7	FALSE	FALSE
13_v.txt	32799	32799-Deletion-T--	Deletion	1	T	-	1	16747	0.00597	38	rnr1D57N	FALSE	CAN	JSY14	2	rnr1D57N-Rep2	GTA	nope	>1bp-ins	A/T-1	none	A/T-1	TCACCGTAATATT	TAATATT	CAT	GTA	T	none	nope	nope_GTA	A/T-1_TAATATT	7	FALSE	FALSE
13_v.txt	32842	32842-Deletion-A--	Deletion	1	A	-	33	16747	0.19705	41.9394	rnr1D57N	FALSE	CAN	JSY14	2	rnr1D57N-Rep2	CAA	nope	>1bp-ins	A/T-1	none	A/T-1	TTACCCAAAAAAT	AAAAAAT	GTT	GTT	T	none	T>none	T>none_GTT	A/T-1_AAAAAAT	7	FALSE	FALSE
13_v.txt	32884	32884-Deletion-A--	Deletion	1	A	-	8	18236	0.0438693	36.625	rnr1D57N	FALSE	CAN	JSY14	2	rnr1D57N-Rep2	CAA	nope	>1bp-ins	A/T-1	none	A/T-1	ACGTCCAAAATTG	AAAATTG	GTT	GTT	T	none	T>none	T>none_GTT	A/T-1_AAAATTG	7	FALSE	FALSE
13_v.txt	32901	32901-Deletion-C--	Deletion	1	C	-	1	18234	0.00548	38	rnr1D57N	FALSE	CAN	JSY14	2	rnr1D57N-Rep2	GCC	nope	>1bp-ins	G/C-1	none	G/C-1	ACTTGGCCAACTA	CCAACTA	CGG	GCC	C	none	nope	nope_GCC	G/C-1_CCAACTA	7	FALSE	FALSE
13_v.txt	32924	32924-Deletion-A--	Deletion	1	A	-	24	18234	0.131622	55.25	rnr1D57N	FALSE	CAN	JSY14	2	rnr1D57N-Rep2	CAA	nope	>1bp-ins	A/T-1	none	A/T-1	CAGGGCAAAAGTG	AAAAGTG	GTT	GTT	T	none	T>none	T>none_GTT	A/T-1_AAAAGTG	7	FALSE	FALSE
13_v.txt	33000	33000-Deletion-A--	Deletion	1	A	-	58	18234	0.318087	59.3793	rnr1D57N	FALSE	CAN	JSY14	2	rnr1D57N-Rep2	GAA	nope	>1bp-ins	A/T-1	none	A/T-1	TGTGAGAAAACTG	AAAACTG	CTT	CTT	T	none	T>none	T>none_CTT	A/T-1_AAAACTG	7	FALSE	FALSE
13_v.txt	33251	33251-Deletion-A--	Deletion	1	A	-	5	11356	0.0440296	53.4	rnr1D57N	FALSE	CAN	JSY14	2	rnr1D57N-Rep2	CAC	nope	>1bp-ins	A/T-1	none	A/T-1	TTCATCACCTATG	ACCTATG	GTG	GTG	T	none	T>none	T>none_GTG	A/T-1_ACCTATG	7	FALSE	FALSE
13_v.txt	33474	33474-Deletion-C--	Deletion	1	C	-	33	11356	0.290595	26.3333	rnr1D57N	FALSE	CAN	JSY14	2	rnr1D57N-Rep2	GCC	nope	>1bp-ins	G/C-1	none	G/C-1	GCTATGCCTTTTT	CCTTTTT	CGG	GCC	C	none	nope	nope_GCC	G/C-1_CCTTTTT	7	FALSE	FALSE
14_v.txt	31723	31723-SNV-A-C	SNV	1	A	C	4	10140	0.0394477	62.25	rnr1D57N	FALSE	CAN	JSY14	3	rnr1D57N-Rep3	CAA	A>C	G/C+1	A/T-1	TA>GC	TA>GC	TGTCCCAAAAAGT	AAAAAGT	GTT	GTT	T	G	T>G	T>G_GTT	TA>GC_AAAAAGT	7	FALSE	FALSE
14_v.txt	32283	32283-SNV-T-G	SNV	1	T	G	722	22305	3.23694	53.0152	rnr1D57N	FALSE	CAN	JSY14	3	rnr1D57N-Rep3	GTA	T>G	G/C+1	A/T-1	TA>GC	TA>GC	CCAACGTAAATAT	TAAATAT	CAT	GTA	T	C	T>G	T>G_GTA	TA>GC_TAAATAT	7	FALSE	FALSE
14_v.txt	32631	32631-SNV-T-G	SNV	1	T	G	4	20619	0.0193996	44.75	rnr1D57N	FALSE	CAN	JSY14	3	rnr1D57N-Rep3	GTT	T>G	G/C+1	A/T-1	TA>GC	TA>GC	CCTTCGTTTTTAT	TTTTTAT	CAA	GTT	T	C	T>G	T>G_GTT	TA>GC_TTTTTAT	7	FALSE	FALSE
14_v.txt	32739	32739-SNV-A-C	SNV	1	A	C	56	20619	0.271594	56.1786	rnr1D57N	FALSE	CAN	JSY14	3	rnr1D57N-Rep3	TAT	A>C	G/C+1	A/T-1	TA>GC	TA>GC	CAGTATATTAGAA	ATTAGAA	ATA	ATA	T	G	T>G	T>G_ATA	TA>GC_ATTAGAA	7	FALSE	FALSE
14_v.txt	32823	32823-SNV-A-C	SNV	1	A	C	12	20619	0.0581987	49.5	rnr1D57N	FALSE	CAN	JSY14	3	rnr1D57N-Rep3	CAT	A>C	G/C+1	A/T-1	TA>GC	TA>GC	AAGTTCATTATTG	ATTATTG	GTA	GTA	T	G	T>G	T>G_GTA	TA>GC_ATTATTG	7	FALSE	FALSE
14_v.txt	32842	32842-SNV-A-C	SNV	1	A	C	3	20619	0.0145497	41.3333	rnr1D57N	FALSE	CAN	JSY14	3	rnr1D57N-Rep3	CAA	A>C	G/C+1	A/T-1	TA>GC	TA>GC	TTACCCAAAAAAT	AAAAAAT	GTT	GTT	T	G	T>G	T>G_GTT	TA>GC_AAAAAAT	7	FALSE	FALSE
14_v.txt	32884	32884-SNV-A-C	SNV	1	A	C	6	22864	0.0262421	36.1667	rnr1D57N	FALSE	CAN	JSY14	3	rnr1D57N-Rep3	CAA	A>C	G/C+1	A/T-1	TA>GC	TA>GC	ACGTCCAAAATTG	AAAATTG	GTT	GTT	T	G	T>G	T>G_GTT	TA>GC_AAAATTG	7	FALSE	FALSE
14_v.txt	33099	33099-SNV-A-C	SNV	1	A	C	10	22863	0.0437388	42.8	rnr1D57N	FALSE	CAN	JSY14	3	rnr1D57N-Rep3	AAG	A>C	G/C+1	A/T-1	TA>GC	TA>GC	GATATAAGAGCGC	AGAGCGC	TTC	TTC	T	G	T>G	T>G_TTC	TA>GC_AGAGCGC	7	FALSE	FALSE
14_v.txt	33269	33269-SNV-A-C	SNV	1	A	C	132	16483	0.800825	15.6212	rnr1D57N	FALSE	CAN	JSY14	3	rnr1D57N-Rep3	TAG	A>C	G/C+1	A/T-1	TA>GC	TA>GC	CTCCATAGAGAAC	AGAGAAC	ATC	ATC	T	G	T>G	T>G_ATC	TA>GC_AGAGAAC	7	FALSE	FALSE
14_v.txt	33476	33476-SNV-T-G	SNV	1	T	G	1	16482	0.00607	37.9989	rnr1D57N	FALSE	CAN	JSY14	3	rnr1D57N-Rep3	CTT	T>G	G/C+1	A/T-1	TA>GC	TA>GC	TATGCCTTTTTTT	TTTTTTT	GAA	CTT	T	C	T>G	T>G_CTT	TA>GC_TTTTTTT	7	FALSE	FALSE
14_v.txt	32055	32055-SNV-T-C	SNV	1	T	C	15	14110	0.106308	58.2667	rnr1D57N	FALSE	CAN	JSY14	3	rnr1D57N-Rep3	GTG	T>C	G/C+1	A/T-1	TA>CG	TA>CG	CTGATGTGCGAGA	TGCGAGA	CAC	GTG	T	G	T>C	T>C_GTG	TA>CG_TGCGAGA	7	FALSE	FALSE
14_v.txt	32256	32256-SNV-A-G	SNV	1	A	G	19	22297	0.0852133	36.7368	rnr1D57N	FALSE	CAN	JSY14	3	rnr1D57N-Rep3	TAG	A>G	G/C+1	A/T-1	TA>CG	TA>CG	TTTGATAGACCAA	AGACCAA	ATC	ATC	T	C	T>C	T>C_ATC	TA>CG_AGACCAA	7	FALSE	FALSE
14_v.txt	32293	32293-SNV-A-G	SNV	1	A	G	33	22305	0.147949	54.1818	rnr1D57N	FALSE	CAN	JSY14	3	rnr1D57N-Rep3	GAA	A>G	G/C+1	A/T-1	TA>CG	TA>CG	TATTTGAATTTGC	AATTTGC	CTT	CTT	T	C	T>C	T>C_CTT	TA>CG_AATTTGC	7	FALSE	FALSE
14_v.txt	32338	32338-SNV-T-C	SNV	1	T	C	3	22305	0.0134499	54.3332	rnr1D57N	FALSE	CAN	JSY14	3	rnr1D57N-Rep3	ATA	T>C	G/C+1	A/T-1	TA>CG	TA>CG	TGAAGATATGTGG	TATGTGG	TAT	ATA	T	G	T>C	T>C_ATA	TA>CG_TATGTGG	7	FALSE	FALSE
14_v.txt	32583	32583-SNV-A-G	SNV	1	A	G	47	20619	0.227945	37.3191	rnr1D57N	FALSE	CAN	JSY14	3	rnr1D57N-Rep3	GAA	A>G	G/C+1	A/T-1	TA>CG	TA>CG	AATGTGAAGGCAG	AAGGCAG	CTT	CTT	T	C	T>C	T>C_CTT	TA>CG_AAGGCAG	7	FALSE	FALSE
14_v.txt	32762	32762-SNV-A-G	SNV	1	A	G	84	20619	0.407391	52.5119	rnr1D57N	FALSE	CAN	JSY14	3	rnr1D57N-Rep3	AAA	A>G	G/C+1	A/T-1	TA>CG	TA>CG	GGCTAAAACTTTG	AACTTTG	TTT	TTT	T	C	T>C	T>C_TTT	TA>CG_AACTTTG	7	FALSE	FALSE
14_v.txt	32787	32787-SNV-T-C	SNV	1	T	C	16	20619	0.0775983	45.0625	rnr1D57N	FALSE	CAN	JSY14	3	rnr1D57N-Rep3	CTC	T>C	G/C+1	A/T-1	TA>CG	TA>CG	CAGAACTCGAATT	TCGAATT	GAG	CTC	T	G	T>C	T>C_CTC	TA>CG_TCGAATT	7	FALSE	FALSE
14_v.txt	33174	33174-SNV-A-G	SNV	1	A	G	199	22857	0.87063	37.2161	rnr1D57N	FALSE	CAN	JSY14	3	rnr1D57N-Rep3	AAG	A>G	G/C+1	A/T-1	TA>CG	TA>CG	CCACCAAGGGCAA	AGGGCAA	TTC	TTC	T	C	T>C	T>C_TTC	TA>CG_AGGGCAA	7	FALSE	FALSE
14_v.txt	33476	33476-SNV-T-C	SNV	1	T	C	26	16482	0.157748	32.6152	rnr1D57N	FALSE	CAN	JSY14	3	rnr1D57N-Rep3	CTT	T>C	G/C+1	A/T-1	TA>CG	TA>CG	TATGCCTTTTTTT	TTTTTTT	GAA	CTT	T	G	T>C	T>C_CTT	TA>CG_TTTTTTT	7	FALSE	FALSE
14_v.txt	32338	32338-SNV-T-A	SNV	1	T	A	1	22305	0.00448	63.9985	rnr1D57N	FALSE	CAN	JSY14	3	rnr1D57N-Rep3	ATA	T>A	A/T+1	A/T-1	TA>AT	TA>AT	TGAAGATATGTGG	TATGTGG	TAT	ATA	T	T	T>A	T>A_ATA	TA>AT_TATGTGG	7	FALSE	FALSE
14_v.txt	32680	32680-SNV-A-T	SNV	1	A	T	120	20619	0.581987	61.9917	rnr1D57N	FALSE	CAN	JSY14	3	rnr1D57N-Rep3	CAA	A>T	A/T+1	A/T-1	TA>AT	TA>AT	TTCTCCAATAACG	AATAACG	GTT	GTT	T	A	T>A	T>A_GTT	TA>AT_AATAACG	7	FALSE	FALSE
14_v.txt	32766	32766-SNV-T-A	SNV	1	T	A	86	20619	0.417091	52.593	rnr1D57N	FALSE	CAN	JSY14	3	rnr1D57N-Rep3	TTT	T>A	A/T+1	A/T-1	TA>AT	TA>AT	AAAACTTTGATGG	TTGATGG	AAA	TTT	T	T	T>A	T>A_TTT	TA>AT_TTGATGG	7	FALSE	FALSE
14_v.txt	32787	32787-SNV-T-A	SNV	1	T	A	19	20619	0.092148	43.2105	rnr1D57N	FALSE	CAN	JSY14	3	rnr1D57N-Rep3	CTC	T>A	A/T+1	A/T-1	TA>AT	TA>AT	CAGAACTCGAATT	TCGAATT	GAG	CTC	T	T	T>A	T>A_CTC	TA>AT_TCGAATT	7	FALSE	FALSE
14_v.txt	32823	32823-SNV-A-T	SNV	1	A	T	9	20619	0.0436491	40.7778	rnr1D57N	FALSE	CAN	JSY14	3	rnr1D57N-Rep3	CAT	A>T	A/T+1	A/T-1	TA>AT	TA>AT	AAGTTCATTATTG	ATTATTG	GTA	GTA	T	A	T>A	T>A_GTA	TA>AT_ATTATTG	7	FALSE	FALSE
14_v.txt	33072	33072-SNV-A-T	SNV	1	A	T	7	22863	0.0306172	52.4286	rnr1D57N	FALSE	CAN	JSY14	3	rnr1D57N-Rep3	CAA	A>T	A/T+1	A/T-1	TA>AT	TA>AT	TATGCCAAAGAAC	AAAGAAC	GTT	GTT	T	A	T>A	T>A_GTT	TA>AT_AAAGAAC	7	FALSE	FALSE
14_v.txt	33095	33095-SNV-T-A	SNV	1	T	A	6	22863	0.0262433	41.4989	rnr1D57N	FALSE	CAN	JSY14	3	rnr1D57N-Rep3	ATA	T>A	A/T+1	A/T-1	TA>AT	TA>AT	ATATGATATAAGA	TATAAGA	TAT	ATA	T	T	T>A	T>A_ATA	TA>AT_TATAAGA	7	FALSE	FALSE
14_v.txt	33364	33364-SNV-T-A	SNV	1	T	A	24	16483	0.145605	52.6667	rnr1D57N	FALSE	CAN	JSY14	3	rnr1D57N-Rep3	CTG	T>A	A/T+1	A/T-1	TA>AT	TA>AT	CACGTCTGTGGTG	TGTGGTG	GAC	CTG	T	T	T>A	T>A_CTG	TA>AT_TGTGGTG	7	FALSE	FALSE
14_v.txt	31650	31650-SNV-C-T	SNV	1	C	T	22	10140	0.216963	34.4091	rnr1D57N	FALSE	CAN	JSY14	3	rnr1D57N-Rep3	GCG	C>T	A/T+1	G/C-1	CG>TA	CG>TA	AGAATGCGAAATG	CGAAATG	CGC	GCG	C	A	C>T	C>T_GCG	CG>TA_CGAAATG	7	FALSE	FALSE
14_v.txt	31829	31829-SNV-G-A	SNV	1	G	A	6	10140	0.0591716	59.6667	rnr1D57N	FALSE	CAN	JSY14	3	rnr1D57N-Rep3	TGC	G>A	A/T+1	G/C-1	CG>TA	CG>TA	GAATATGCATTGA	GCATTGA	ACG	ACG	C	T	C>T	C>T_ACG	CG>TA_GCATTGA	7	FALSE	FALSE
14_v.txt	31845	31845-SNV-C-T	SNV	1	C	T	17	10140	0.167653	40.7059	rnr1D57N	FALSE	CAN	JSY14	3	rnr1D57N-Rep3	CCA	C>T	A/T+1	G/C-1	CG>TA	CG>TA	AAGATCCAAACAG	CAAACAG	GGT	CCA	C	A	C>T	C>T_CCA	CG>TA_CAAACAG	7	FALSE	FALSE
14_v.txt	31912	31912-SNV-C-T	SNV	1	C	T	13	10140	0.128205	39.2308	rnr1D57N	FALSE	CAN	JSY14	3	rnr1D57N-Rep3	GCA	C>T	A/T+1	G/C-1	CG>TA	CG>TA	TTGGTGCAAAAGC	CAAAAGC	CGT	GCA	C	A	C>T	C>T_GCA	CG>TA_CAAAAGC	7	FALSE	FALSE
14_v.txt	31930	31930-SNV-G-A	SNV	1	G	A	42	10140	0.414201	37.0238	rnr1D57N	FALSE	CAN	JSY14	3	rnr1D57N-Rep3	TGA	G>A	A/T+1	G/C-1	CG>TA	CG>TA	AACCTTGAATAAT	GAATAAT	ACT	ACT	C	T	C>T	C>T_ACT	CG>TA_GAATAAT	7	FALSE	FALSE
14_v.txt	31960	31960-SNV-C-T	SNV	1	C	T	18	14108	0.127587	36.8889	rnr1D57N	FALSE	CAN	JSY14	3	rnr1D57N-Rep3	GCC	C>T	A/T+1	G/C-1	CG>TA	CG>TA	ATGTGGCCGCATA	CCGCATA	CGG	GCC	C	A	C>T	C>T_GCC	CG>TA_CCGCATA	7	FALSE	FALSE
14_v.txt	31962	31962-SNV-G-A	SNV	1	G	A	19	14108	0.134675	34.4737	rnr1D57N	FALSE	CAN	JSY14	3	rnr1D57N-Rep3	CGC	G>A	A/T+1	G/C-1	CG>TA	CG>TA	GTGGCCGCATAAT	GCATAAT	GCG	GCG	C	T	C>T	C>T_GCG	CG>TA_GCATAAT	7	FALSE	FALSE
14_v.txt	32057	32057-SNV-C-T	SNV	1	C	T	15	14110	0.106308	62.2667	rnr1D57N	FALSE	CAN	JSY14	3	rnr1D57N-Rep3	GCG	C>T	A/T+1	G/C-1	CG>TA	CG>TA	GATGTGCGAGATT	CGAGATT	CGC	GCG	C	A	C>T	C>T_GCG	CG>TA_CGAGATT	7	FALSE	FALSE
14_v.txt	32075	32075-SNV-C-T	SNV	1	C	T	48	14110	0.340184	63.3542	rnr1D57N	FALSE	CAN	JSY14	3	rnr1D57N-Rep3	ACC	C>T	A/T+1	G/C-1	CG>TA	CG>TA	AAATAACCATGCA	CCATGCA	TGG	ACC	C	A	C>T	C>T_ACC	CG>TA_CCATGCA	7	FALSE	FALSE
14_v.txt	32092	32092-SNV-C-T	SNV	1	C	T	17	14110	0.120482	60.1765	rnr1D57N	FALSE	CAN	JSY14	3	rnr1D57N-Rep3	GCA	C>T	A/T+1	G/C-1	CG>TA	CG>TA	AGCCTGCAACACC	CAACACC	CGT	GCA	C	A	C>T	C>T_GCA	CG>TA_CAACACC	7	FALSE	FALSE
14_v.txt	32165	32165-SNV-G-A	SNV	1	G	A	21	14110	0.148831	52	rnr1D57N	FALSE	CAN	JSY14	3	rnr1D57N-Rep3	CGC	G>A	A/T+1	G/C-1	CG>TA	CG>TA	CAAAGCGCCAAAT	GCCAAAT	GCG	GCG	C	T	C>T	C>T_GCG	CG>TA_GCCAAAT	7	FALSE	FALSE
14_v.txt	32173	32173-SNV-C-T	SNV	1	C	T	15	14110	0.106308	44.6	rnr1D57N	FALSE	CAN	JSY14	3	rnr1D57N-Rep3	GCA	C>T	A/T+1	G/C-1	CG>TA	CG>TA	CAAATGCAGCAGT	CAGCAGT	CGT	GCA	C	A	C>T	C>T_GCA	CG>TA_CAGCAGT	7	FALSE	FALSE
14_v.txt	32271	32271-SNV-C-T	SNV	1	C	T	79	22305	0.354181	35.2911	rnr1D57N	FALSE	CAN	JSY14	3	rnr1D57N-Rep3	ACG	C>T	A/T+1	G/C-1	CG>TA	CG>TA	AAAATACGGGAAC	CGGGAAC	TGC	ACG	C	A	C>T	C>T_ACG	CG>TA_CGGGAAC	7	FALSE	FALSE
14_v.txt	32274	32274-SNV-G-A	SNV	1	G	A	22	22305	0.0986326	35.2273	rnr1D57N	FALSE	CAN	JSY14	3	rnr1D57N-Rep3	GGA	G>A	A/T+1	G/C-1	CG>TA	CG>TA	ATACGGGAACCAA	GAACCAA	CCT	CCT	C	T	C>T	C>T_CCT	CG>TA_GAACCAA	7	FALSE	FALSE
14_v.txt	32299	32299-SNV-C-T	SNV	1	C	T	47	22305	0.210715	53	rnr1D57N	FALSE	CAN	JSY14	3	rnr1D57N-Rep3	GCG	C>T	A/T+1	G/C-1	CG>TA	CG>TA	AATTTGCGGCAGA	CGGCAGA	CGC	GCG	C	A	C>T	C>T_GCG	CG>TA_CGGCAGA	7	FALSE	FALSE
14_v.txt	32466	32466-SNV-C-T	SNV	1	C	T	32	22305	0.143466	44.875	rnr1D57N	FALSE	CAN	JSY14	3	rnr1D57N-Rep3	GCC	C>T	A/T+1	G/C-1	CG>TA	CG>TA	AGAGAGCCAATGT	CCAATGT	CGG	GCC	C	A	C>T	C>T_GCC	CG>TA_CCAATGT	7	FALSE	FALSE
14_v.txt	32487	32487-SNV-C-T	SNV	1	C	T	36	22305	0.161399	47.1944	rnr1D57N	FALSE	CAN	JSY14	3	rnr1D57N-Rep3	ACG	C>T	A/T+1	G/C-1	CG>TA	CG>TA	AAGATACGGAAAA	CGGAAAA	TGC	ACG	C	A	C>T	C>T_ACG	CG>TA_CGGAAAA	7	FALSE	FALSE
14_v.txt	32535	32535-SNV-G-A	SNV	1	G	A	24	22304	0.107604	36.7496	rnr1D57N	FALSE	CAN	JSY14	3	rnr1D57N-Rep3	TGC	G>A	A/T+1	G/C-1	CG>TA	CG>TA	GGGTTTGCAGCTT	GCAGCTT	ACG	ACG	C	T	C>T	C>T_ACG	CG>TA_GCAGCTT	7	FALSE	FALSE
14_v.txt	32536	32536-SNV-C-T	SNV	1	C	T	34	22304	0.152439	36.7354	rnr1D57N	FALSE	CAN	JSY14	3	rnr1D57N-Rep3	GCA	C>T	A/T+1	G/C-1	CG>TA	CG>TA	GGTTTGCAGCTTC	CAGCTTC	CGT	GCA	C	A	C>T	C>T_GCA	CG>TA_CAGCTTC	7	FALSE	FALSE
14_v.txt	32590	32590-SNV-C-T	SNV	1	C	T	36	20619	0.174596	37.0278	rnr1D57N	FALSE	CAN	JSY14	3	rnr1D57N-Rep3	GCG	C>T	A/T+1	G/C-1	CG>TA	CG>TA	AGGCAGCGTTAAT	CGTTAAT	CGC	GCG	C	A	C>T	C>T_GCG	CG>TA_CGTTAAT	7	FALSE	FALSE
14_v.txt	32660	32660-SNV-C-T	SNV	1	C	T	34	20619	0.164896	59.1176	rnr1D57N	FALSE	CAN	JSY14	3	rnr1D57N-Rep3	CCC	C>T	A/T+1	G/C-1	CG>TA	CG>TA	TGGACCCCAGGCA	CCAGGCA	GGG	CCC	C	A	C>T	C>T_CCC	CG>TA_CCAGGCA	7	FALSE	FALSE
14_v.txt	32700	32700-SNV-C-T	SNV	1	C	T	29	20619	0.140647	62.6897	rnr1D57N	FALSE	CAN	JSY14	3	rnr1D57N-Rep3	GCC	C>T	A/T+1	G/C-1	CG>TA	CG>TA	ACTGGGCCGGTAA	CCGGTAA	CGG	GCC	C	A	C>T	C>T_GCC	CG>TA_CCGGTAA	7	FALSE	FALSE
14_v.txt	32702	32702-SNV-G-A	SNV	1	G	A	20	20619	0.0969979	54.8	rnr1D57N	FALSE	CAN	JSY14	3	rnr1D57N-Rep3	CGG	G>A	A/T+1	G/C-1	CG>TA	CG>TA	TGGGCCGGTAACC	GGTAACC	GCC	GCC	C	T	C>T	C>T_GCC	CG>TA_GGTAACC	7	FALSE	FALSE
14_v.txt	32713	32713-SNV-C-T	SNV	1	C	T	17	20619	0.0824482	59.5294	rnr1D57N	FALSE	CAN	JSY14	3	rnr1D57N-Rep3	GCA	C>T	A/T+1	G/C-1	CG>TA	CG>TA	CCCCAGCACCACA	CACCACA	CGT	GCA	C	A	C>T	C>T_GCA	CG>TA_CACCACA	7	FALSE	FALSE
14_v.txt	32757	32757-SNV-G-A	SNV	1	G	A	22	20619	0.106698	58.5	rnr1D57N	FALSE	CAN	JSY14	3	rnr1D57N-Rep3	GGC	G>A	A/T+1	G/C-1	CG>TA	CG>TA	ATAATGGCTAAAA	GCTAAAA	CCG	CCG	C	T	C>T	C>T_CCG	CG>TA_GCTAAAA	7	FALSE	FALSE
14_v.txt	32776	32776-SNV-C-T	SNV	1	C	T	26	20619	0.126097	50.7308	rnr1D57N	FALSE	CAN	JSY14	3	rnr1D57N-Rep3	GCG	C>T	A/T+1	G/C-1	CG>TA	CG>TA	TGGAAGCGACCCA	CGACCCA	CGC	GCG	C	A	C>T	C>T_GCG	CG>TA_CGACCCA	7	FALSE	FALSE
14_v.txt	32796	32796-SNV-C-T	SNV	1	C	T	30	20619	0.145497	42.7667	rnr1D57N	FALSE	CAN	JSY14	3	rnr1D57N-Rep3	ACC	C>T	A/T+1	G/C-1	CG>TA	CG>TA	AATTCACCGTAAT	CCGTAAT	TGG	ACC	C	A	C>T	C>T_ACC	CG>TA_CCGTAAT	7	FALSE	FALSE
14_v.txt	32798	32798-SNV-G-A	SNV	1	G	A	30	20619	0.145497	42.7333	rnr1D57N	FALSE	CAN	JSY14	3	rnr1D57N-Rep3	CGT	G>A	A/T+1	G/C-1	CG>TA	CG>TA	TTCACCGTAATAT	GTAATAT	GCA	GCA	C	T	C>T	C>T_GCA	CG>TA_GTAATAT	7	FALSE	FALSE
14_v.txt	32855	32855-SNV-C-T	SNV	1	C	T	52	20618	0.252207	36.1731	rnr1D57N	FALSE	CAN	JSY14	3	rnr1D57N-Rep3	TCC	C>T	A/T+1	G/C-1	CG>TA	CG>TA	ACTAATCCATGCC	CCATGCC	AGG	TCC	C	A	C>T	C>T_TCC	CG>TA_CCATGCC	7	FALSE	FALSE
14_v.txt	32860	32860-SNV-C-T	SNV	1	C	T	22	20618	0.106703	37.6364	rnr1D57N	FALSE	CAN	JSY14	3	rnr1D57N-Rep3	GCC	C>T	A/T+1	G/C-1	CG>TA	CG>TA	TCCATGCCGCCAG	CCGCCAG	CGG	GCC	C	A	C>T	C>T_GCC	CG>TA_CCGCCAG	7	FALSE	FALSE
14_v.txt	32901	32901-SNV-C-T	SNV	1	C	T	55	22863	0.240563	31.2727	rnr1D57N	FALSE	CAN	JSY14	3	rnr1D57N-Rep3	GCC	C>T	A/T+1	G/C-1	CG>TA	CG>TA	ACTTGGCCAACTA	CCAACTA	CGG	GCC	C	A	C>T	C>T_GCC	CG>TA_CCAACTA	7	FALSE	FALSE
14_v.txt	32935	32935-SNV-C-T	SNV	1	C	T	29	22863	0.126842	38.1034	rnr1D57N	FALSE	CAN	JSY14	3	rnr1D57N-Rep3	GCC	C>T	A/T+1	G/C-1	CG>TA	CG>TA	TGATTGCCCAAGA	CCCAAGA	CGG	GCC	C	A	C>T	C>T_GCC	CG>TA_CCCAAGA	7	FALSE	FALSE
14_v.txt	32946	32946-SNV-C-T	SNV	1	C	T	39	22863	0.170581	57.7436	rnr1D57N	FALSE	CAN	JSY14	3	rnr1D57N-Rep3	CCA	C>T	A/T+1	G/C-1	CG>TA	CG>TA	GAAAACCAATACA	CAATACA	GGT	CCA	C	A	C>T	C>T_CCA	CG>TA_CAATACA	7	FALSE	FALSE
14_v.txt	32965	32965-SNV-C-T	SNV	1	C	T	23	22863	0.100599	58.087	rnr1D57N	FALSE	CAN	JSY14	3	rnr1D57N-Rep3	GCC	C>T	A/T+1	G/C-1	CG>TA	CG>TA	CATTGGCCGCACC	CCGCACC	CGG	GCC	C	A	C>T	C>T_GCC	CG>TA_CCGCACC	7	FALSE	FALSE
14_v.txt	32967	32967-SNV-G-A	SNV	1	G	A	55	22863	0.240563	59.8909	rnr1D57N	FALSE	CAN	JSY14	3	rnr1D57N-Rep3	CGC	G>A	A/T+1	G/C-1	CG>TA	CG>TA	TTGGCCGCACCAA	GCACCAA	GCG	GCG	C	T	C>T	C>T_GCG	CG>TA_GCACCAA	7	FALSE	FALSE
14_v.txt	33012	33012-SNV-G-A	SNV	1	G	A	47	22863	0.205572	63.5745	rnr1D57N	FALSE	CAN	JSY14	3	rnr1D57N-Rep3	AGA	G>A	A/T+1	G/C-1	CG>TA	CG>TA	GTGAAAGAGGATG	GAGGATG	TCT	TCT	C	T	C>T	C>T_TCT	CG>TA_GAGGATG	7	FALSE	FALSE
14_v.txt	33056	33056-SNV-C-T	SNV	1	C	T	21	22863	0.0918515	59	rnr1D57N	FALSE	CAN	JSY14	3	rnr1D57N-Rep3	GCG	C>T	A/T+1	G/C-1	CG>TA	CG>TA	GGACTGCGTGACA	CGTGACA	CGC	GCG	C	A	C>T	C>T_GCG	CG>TA_CGTGACA	7	FALSE	FALSE
14_v.txt	33069	33069-SNV-G-A	SNV	1	G	A	20	22863	0.0874776	53.5	rnr1D57N	FALSE	CAN	JSY14	3	rnr1D57N-Rep3	TGC	G>A	A/T+1	G/C-1	CG>TA	CG>TA	GAATATGCCAAAG	GCCAAAG	ACG	ACG	C	T	C>T	C>T_ACG	CG>TA_GCCAAAG	7	FALSE	FALSE
14_v.txt	33111	33111-SNV-G-A	SNV	1	G	A	24	22863	0.104973	40.9167	rnr1D57N	FALSE	CAN	JSY14	3	rnr1D57N-Rep3	TGG	G>A	A/T+1	G/C-1	CG>TA	CG>TA	CCCACTGGGCCGG	GGGCCGG	ACC	ACC	C	T	C>T	C>T_ACC	CG>TA_GGGCCGG	7	FALSE	FALSE
14_v.txt	33113	33113-SNV-G-A	SNV	1	G	A	23	22863	0.100599	46.6508	rnr1D57N	FALSE	CAN	JSY14	3	rnr1D57N-Rep3	GGC	G>A	A/T+1	G/C-1	CG>TA	CG>TA	CACTGGGCCGGCG	GCCGGCG	CCG	CCG	C	T	C>T	C>T_CCG	CG>TA_GCCGGCG	7	FALSE	FALSE
14_v.txt	33114	33114-SNV-C-T	SNV	1	C	T	29	22863	0.126842	39.7241	rnr1D57N	FALSE	CAN	JSY14	3	rnr1D57N-Rep3	GCC	C>T	A/T+1	G/C-1	CG>TA	CG>TA	ACTGGGCCGGCGT	CCGGCGT	CGG	GCC	C	A	C>T	C>T_GCC	CG>TA_CCGGCGT	7	FALSE	FALSE
14_v.txt	33118	33118-SNV-C-T	SNV	1	C	T	24	22863	0.104973	41.4167	rnr1D57N	FALSE	CAN	JSY14	3	rnr1D57N-Rep3	GCG	C>T	A/T+1	G/C-1	CG>TA	CG>TA	GGCCGGCGTTGGT	CGTTGGT	CGC	GCG	C	A	C>T	C>T_GCG	CG>TA_CGTTGGT	7	FALSE	FALSE
14_v.txt	33153	33153-SNV-C-T	SNV	1	C	T	133	22863	0.581726	36.3158	rnr1D57N	FALSE	CAN	JSY14	3	rnr1D57N-Rep3	ACC	C>T	A/T+1	G/C-1	CG>TA	CG>TA	AAAAGACCTGTAC	CCTGTAC	TGG	ACC	C	A	C>T	C>T_ACC	CG>TA_CCTGTAC	7	FALSE	FALSE
14_v.txt	33168	33168-SNV-C-T	SNV	1	C	T	20	22862	0.0874814	35.55	rnr1D57N	FALSE	CAN	JSY14	3	rnr1D57N-Rep3	ACC	C>T	A/T+1	G/C-1	CG>TA	CG>TA	ATAGTACCACCAA	CCACCAA	TGG	ACC	C	A	C>T	C>T_ACC	CG>TA_CCACCAA	7	FALSE	FALSE
14_v.txt	33258	33258-SNV-C-T	SNV	1	C	T	20	16483	0.121337	45.35	rnr1D57N	FALSE	CAN	JSY14	3	rnr1D57N-Rep3	GCC	C>T	A/T+1	G/C-1	CG>TA	CG>TA	CCTATGCCATCCT	CCATCCT	CGG	GCC	C	A	C>T	C>T_GCC	CG>TA_CCATCCT	7	FALSE	FALSE
14_v.txt	33276	33276-SNV-G-A	SNV	1	G	A	28	16483	0.169872	46.4643	rnr1D57N	FALSE	CAN	JSY14	3	rnr1D57N-Rep3	CGT	G>A	A/T+1	G/C-1	CG>TA	CG>TA	GAGAACGTATCCT	GTATCCT	GCA	GCA	C	T	C>T	C>T_GCA	CG>TA_GTATCCT	7	FALSE	FALSE
14_v.txt	33284	33284-SNV-G-A	SNV	1	G	A	18	16483	0.109203	49.9444	rnr1D57N	FALSE	CAN	JSY14	3	rnr1D57N-Rep3	CGC	G>A	A/T+1	G/C-1	CG>TA	CG>TA	ATCCTCGCCATTT	GCCATTT	GCG	GCG	C	T	C>T	C>T_GCG	CG>TA_GCCATTT	7	FALSE	FALSE
14_v.txt	33309	33309-SNV-C-T	SNV	1	C	T	20	16483	0.121337	53.5463	rnr1D57N	FALSE	CAN	JSY14	3	rnr1D57N-Rep3	GCG	C>T	A/T+1	G/C-1	CG>TA	CG>TA	AAAGAGCGCAATG	CGCAATG	CGC	GCG	C	A	C>T	C>T_GCG	CG>TA_CGCAATG	7	FALSE	FALSE
14_v.txt	33310	33310-SNV-G-A	SNV	1	G	A	27	16480	0.163835	60.9884	rnr1D57N	FALSE	CAN	JSY14	3	rnr1D57N-Rep3	CGC	G>A	A/T+1	G/C-1	CG>TA	CG>TA	AAGAGCGCAATGG	GCAATGG	GCG	GCG	C	T	C>T	C>T_GCG	CG>TA_GCAATGG	7	FALSE	FALSE
14_v.txt	33392	33392-SNV-G-A	SNV	1	G	A	23	16483	0.139538	50.0435	rnr1D57N	FALSE	CAN	JSY14	3	rnr1D57N-Rep3	CGT	G>A	A/T+1	G/C-1	CG>TA	CG>TA	AACGTCGTGAAAG	GTGAAAG	GCA	GCA	C	T	C>T	C>T_GCA	CG>TA_GTGAAAG	7	FALSE	FALSE
14_v.txt	33474	33474-SNV-C-T	SNV	1	C	T	23	16483	0.139538	34.9565	rnr1D57N	FALSE	CAN	JSY14	3	rnr1D57N-Rep3	GCC	C>T	A/T+1	G/C-1	CG>TA	CG>TA	GCTATGCCTTTTT	CCTTTTT	CGG	GCC	C	A	C>T	C>T_GCC	CG>TA_CCTTTTT	7	FALSE	FALSE
14_v.txt	32200	32200-SNV-G-C	SNV	1	G	C	9	14110	0.0637845	43.5556	rnr1D57N	FALSE	CAN	JSY14	3	rnr1D57N-Rep3	GGA	G>C	G/C+1	G/C-1	CG>GC	CG>GC	TGTATGGAACACC	GAACACC	CCT	CCT	C	G	C>G	C>G_CCT	CG>GC_GAACACC	7	FALSE	FALSE
14_v.txt	32271	32271-SNV-C-G	SNV	1	C	G	7	22305	0.0313831	37	rnr1D57N	FALSE	CAN	JSY14	3	rnr1D57N-Rep3	ACG	C>G	G/C+1	G/C-1	CG>GC	CG>GC	AAAATACGGGAAC	CGGGAAC	TGC	ACG	C	C	C>G	C>G_ACG	CG>GC_CGGGAAC	7	FALSE	FALSE
14_v.txt	32302	32302-SNV-C-G	SNV	1	C	G	7	22305	0.0313831	50.5714	rnr1D57N	FALSE	CAN	JSY14	3	rnr1D57N-Rep3	GCA	C>G	G/C+1	G/C-1	CG>GC	CG>GC	TTGCGGCAGAAAT	CAGAAAT	CGT	GCA	C	C	C>G	C>G_GCA	CG>GC_CAGAAAT	7	FALSE	FALSE
14_v.txt	32471	32471-SNV-G-C	SNV	1	G	C	7	22305	0.0313831	48.5714	rnr1D57N	FALSE	CAN	JSY14	3	rnr1D57N-Rep3	TGT	G>C	G/C+1	G/C-1	CG>GC	CG>GC	GCCAATGTAGAAG	GTAGAAG	ACA	ACA	C	G	C>G	C>G_ACA	CG>GC_GTAGAAG	7	FALSE	FALSE
14_v.txt	32536	32536-SNV-C-G	SNV	1	C	G	2	22304	0.00897	36.0005	rnr1D57N	FALSE	CAN	JSY14	3	rnr1D57N-Rep3	GCA	C>G	G/C+1	G/C-1	CG>GC	CG>GC	GGTTTGCAGCTTC	CAGCTTC	CGT	GCA	C	C	C>G	C>G_GCA	CG>GC_CAGCTTC	7	FALSE	FALSE
14_v.txt	32749	32749-SNV-C-G	SNV	1	C	G	7	20619	0.0339493	60	rnr1D57N	FALSE	CAN	JSY14	3	rnr1D57N-Rep3	CCG	C>G	G/C+1	G/C-1	CG>GC	CG>GC	GAAACCCGATAAT	CGATAAT	GGC	CCG	C	C	C>G	C>G_CCG	CG>GC_CGATAAT	7	FALSE	FALSE
14_v.txt	32788	32788-SNV-C-G	SNV	1	C	G	2	20619	0.0097	36.5021	rnr1D57N	FALSE	CAN	JSY14	3	rnr1D57N-Rep3	TCG	C>G	G/C+1	G/C-1	CG>GC	CG>GC	AGAACTCGAATTC	CGAATTC	AGC	TCG	C	C	C>G	C>G_TCG	CG>GC_CGAATTC	7	FALSE	FALSE
14_v.txt	32829	32829-SNV-G-C	SNV	1	G	C	79	20619	0.383142	45.1139	rnr1D57N	FALSE	CAN	JSY14	3	rnr1D57N-Rep3	TGT	G>C	G/C+1	G/C-1	CG>GC	CG>GC	ATTATTGTGATAA	GTGATAA	ACA	ACA	C	G	C>G	C>G_ACA	CG>GC_GTGATAA	7	FALSE	FALSE
14_v.txt	33172	33172-SNV-C-G	SNV	1	C	G	46	22862	0.201207	37.9565	rnr1D57N	FALSE	CAN	JSY14	3	rnr1D57N-Rep3	CCA	C>G	G/C+1	G/C-1	CG>GC	CG>GC	TACCACCAAGGGC	CAAGGGC	GGT	CCA	C	C	C>G	C>G_CCA	CG>GC_CAAGGGC	7	FALSE	FALSE
14_v.txt	33284	33284-SNV-G-C	SNV	1	G	C	4	16483	0.0242674	41.75	rnr1D57N	FALSE	CAN	JSY14	3	rnr1D57N-Rep3	CGC	G>C	G/C+1	G/C-1	CG>GC	CG>GC	ATCCTCGCCATTT	GCCATTT	GCG	GCG	C	G	C>G	C>G_GCG	CG>GC_GCCATTT	7	FALSE	FALSE
14_v.txt	33309	33309-SNV-C-G	SNV	1	C	G	1	16483	0.00607	56.9952	rnr1D57N	FALSE	CAN	JSY14	3	rnr1D57N-Rep3	GCG	C>G	G/C+1	G/C-1	CG>GC	CG>GC	AAAGAGCGCAATG	CGCAATG	CGC	GCG	C	C	C>G	C>G_GCG	CG>GC_CGCAATG	7	FALSE	FALSE
14_v.txt	33354	33354-SNV-G-C	SNV	1	G	C	30	16483	0.182006	57.8333	rnr1D57N	FALSE	CAN	JSY14	3	rnr1D57N-Rep3	TGA	G>C	G/C+1	G/C-1	CG>GC	CG>GC	GGTATTGACCCAC	GACCCAC	ACT	ACT	C	G	C>G	C>G_ACT	CG>GC_GACCCAC	7	FALSE	FALSE
14_v.txt	33475	33475-SNV-C-G	SNV	1	C	G	2	16483	0.0121337	38	rnr1D57N	FALSE	CAN	JSY14	3	rnr1D57N-Rep3	CCT	C>G	G/C+1	G/C-1	CG>GC	CG>GC	CTATGCCTTTTTT	CTTTTTT	GGA	CCT	C	C	C>G	C>G_CCT	CG>GC_CTTTTTT	7	FALSE	FALSE
14_v.txt	31829	31829-SNV-G-T	SNV	1	G	T	12	10140	0.118343	56.0833	rnr1D57N	FALSE	CAN	JSY14	3	rnr1D57N-Rep3	TGC	G>T	A/T+1	G/C-1	CG>AT	CG>AT	GAATATGCATTGA	GCATTGA	ACG	ACG	C	A	C>A	C>A_ACG	CG>AT_GCATTGA	7	FALSE	FALSE
14_v.txt	31971	31971-SNV-G-T	SNV	1	G	T	14	14108	0.0992345	16.5	rnr1D57N	FALSE	CAN	JSY14	3	rnr1D57N-Rep3	AGC	G>T	A/T+1	G/C-1	CG>AT	CG>AT	TAATAAGCCAAGC	GCCAAGC	TCG	TCG	C	A	C>A	C>A_TCG	CG>AT_GCCAAGC	7	FALSE	FALSE
14_v.txt	32008	32008-SNV-C-A	SNV	1	C	A	1863	14108	13.2053	57.599	rnr1D57N	FALSE	CAN	JSY14	3	rnr1D57N-Rep3	TCG	C>A	A/T+1	G/C-1	CG>AT	CG>AT	GTAACTCGTCACG	CGTCACG	AGC	TCG	C	T	C>A	C>A_TCG	CG>AT_CGTCACG	7	FALSE	FALSE
14_v.txt	32188	32188-SNV-C-A	SNV	1	C	A	19	14110	0.134656	41.0526	rnr1D57N	FALSE	CAN	JSY14	3	rnr1D57N-Rep3	ACT	C>A	A/T+1	G/C-1	CG>AT	CG>AT	CGAAAACTGCAAT	CTGCAAT	TGA	ACT	C	T	C>A	C>A_ACT	CG>AT_CTGCAAT	7	FALSE	FALSE
14_v.txt	32238	32238-SNV-G-T	SNV	1	G	T	9	14109	0.0637891	35	rnr1D57N	FALSE	CAN	JSY14	3	rnr1D57N-Rep3	AGC	G>T	A/T+1	G/C-1	CG>AT	CG>AT	TTAGGAGCCAACT	GCCAACT	TCG	TCG	C	A	C>A	C>A_TCG	CG>AT_GCCAACT	7	FALSE	FALSE
14_v.txt	32274	32274-SNV-G-T	SNV	1	G	T	10	22305	0.044833	34.3	rnr1D57N	FALSE	CAN	JSY14	3	rnr1D57N-Rep3	GGA	G>T	A/T+1	G/C-1	CG>AT	CG>AT	ATACGGGAACCAA	GAACCAA	CCT	CCT	C	A	C>A	C>A_CCT	CG>AT_GAACCAA	7	FALSE	FALSE
14_v.txt	32545	32545-SNV-C-A	SNV	1	C	A	12	22304	0.053802	35.25	rnr1D57N	FALSE	CAN	JSY14	3	rnr1D57N-Rep3	CCA	C>A	A/T+1	G/C-1	CG>AT	CG>AT	CTTCACCAGCAGT	CAGCAGT	GGT	CCA	C	T	C>A	C>A_CCA	CG>AT_CAGCAGT	7	FALSE	FALSE
14_v.txt	32556	32556-SNV-C-A	SNV	1	C	A	19	22303	0.0851903	35.2105	rnr1D57N	FALSE	CAN	JSY14	3	rnr1D57N-Rep3	ACC	C>A	A/T+1	G/C-1	CG>AT	CG>AT	GTGATACCAACTA	CCAACTA	TGG	ACC	C	T	C>A	C>A_ACC	CG>AT_CCAACTA	7	FALSE	FALSE
14_v.txt	32572	32572-SNV-C-A	SNV	1	C	A	13	20619	0.0630486	33.0769	rnr1D57N	FALSE	CAN	JSY14	3	rnr1D57N-Rep3	CCT	C>A	A/T+1	G/C-1	CG>AT	CG>AT	CAGTACCTTGAAA	CTTGAAA	GGA	CCT	C	T	C>A	C>A_CCT	CG>AT_CTTGAAA	7	FALSE	FALSE
14_v.txt	32575	32575-SNV-G-T	SNV	1	G	T	105	20619	0.509239	37.019	rnr1D57N	FALSE	CAN	JSY14	3	rnr1D57N-Rep3	TGA	G>T	A/T+1	G/C-1	CG>AT	CG>AT	TACCTTGAAATGT	GAAATGT	ACT	ACT	C	A	C>A	C>A_ACT	CG>AT_GAAATGT	7	FALSE	FALSE
14_v.txt	32692	32692-SNV-C-A	SNV	1	C	A	33	20619	0.160047	51.9394	rnr1D57N	FALSE	CAN	JSY14	3	rnr1D57N-Rep3	CCA	C>A	A/T+1	G/C-1	CG>AT	CG>AT	GGAATCCAACTGG	CAACTGG	GGT	CCA	C	T	C>A	C>A_CCA	CG>AT_CAACTGG	7	FALSE	FALSE
14_v.txt	32713	32713-SNV-C-A	SNV	1	C	A	49	20619	0.237645	58.6735	rnr1D57N	FALSE	CAN	JSY14	3	rnr1D57N-Rep3	GCA	C>A	A/T+1	G/C-1	CG>AT	CG>AT	CCCCAGCACCACA	CACCACA	CGT	GCA	C	T	C>A	C>A_GCA	CG>AT_CACCACA	7	FALSE	FALSE
14_v.txt	32783	32783-SNV-G-T	SNV	1	G	T	13	20619	0.0630486	45.1538	rnr1D57N	FALSE	CAN	JSY14	3	rnr1D57N-Rep3	AGA	G>T	A/T+1	G/C-1	CG>AT	CG>AT	GACCCAGAACTCG	GAACTCG	TCT	TCT	C	A	C>A	C>A_TCT	CG>AT_GAACTCG	7	FALSE	FALSE
14_v.txt	32788	32788-SNV-C-A	SNV	1	C	A	22	20619	0.106698	46.3194	rnr1D57N	FALSE	CAN	JSY14	3	rnr1D57N-Rep3	TCG	C>A	A/T+1	G/C-1	CG>AT	CG>AT	AGAACTCGAATTC	CGAATTC	AGC	TCG	C	T	C>A	C>A_TCG	CG>AT_CGAATTC	7	FALSE	FALSE
14_v.txt	32954	32954-SNV-G-T	SNV	1	G	T	22	22863	0.0962253	51.7727	rnr1D57N	FALSE	CAN	JSY14	3	rnr1D57N-Rep3	TGT	G>T	A/T+1	G/C-1	CG>AT	CG>AT	ATACATGTAACCA	GTAACCA	ACA	ACA	C	A	C>A	C>A_ACA	CG>AT_GTAACCA	7	FALSE	FALSE
14_v.txt	32997	32997-SNV-G-T	SNV	1	G	T	29	22863	0.126842	60.8966	rnr1D57N	FALSE	CAN	JSY14	3	rnr1D57N-Rep3	TGA	G>T	A/T+1	G/C-1	CG>AT	CG>AT	CTTTGTGAGAAAA	GAGAAAA	ACT	ACT	C	A	C>A	C>A_ACT	CG>AT_GAGAAAA	7	FALSE	FALSE
14_v.txt	33015	33015-SNV-G-T	SNV	1	G	T	15	22863	0.0656082	55.9333	rnr1D57N	FALSE	CAN	JSY14	3	rnr1D57N-Rep3	GGA	G>T	A/T+1	G/C-1	CG>AT	CG>AT	AAAGAGGATGTAA	GATGTAA	CCT	CCT	C	A	C>A	C>A_CCT	CG>AT_GATGTAA	7	FALSE	FALSE
14_v.txt	33114	33114-SNV-C-A	SNV	1	C	A	25	22863	0.109347	42.878	rnr1D57N	FALSE	CAN	JSY14	3	rnr1D57N-Rep3	GCC	C>A	A/T+1	G/C-1	CG>AT	CG>AT	ACTGGGCCGGCGT	CCGGCGT	CGG	GCC	C	T	C>A	C>A_GCC	CG>AT_CCGGCGT	7	FALSE	FALSE
14_v.txt	33160	33160-SNV-C-A	SNV	1	C	A	152	22863	0.66483	37.5592	rnr1D57N	FALSE	CAN	JSY14	3	rnr1D57N-Rep3	CCA	C>A	A/T+1	G/C-1	CG>AT	CG>AT	CTGTACCAATAGT	CAATAGT	GGT	CCA	C	T	C>A	C>A_CCA	CG>AT_CAATAGT	7	FALSE	FALSE
14_v.txt	33195	33195-SNV-C-A	SNV	1	C	A	87	16484	0.527785	36.3333	rnr1D57N	FALSE	CAN	JSY14	3	rnr1D57N-Rep3	TCT	C>A	A/T+1	G/C-1	CG>AT	CG>AT	ATATGTCTTTGCT	CTTTGCT	AGA	TCT	C	T	C>A	C>A_TCT	CG>AT_CTTTGCT	7	FALSE	FALSE
14_v.txt	33474	33474-SNV-C-A	SNV	1	C	A	36	16483	0.218407	32.3333	rnr1D57N	FALSE	CAN	JSY14	3	rnr1D57N-Rep3	GCC	C>A	A/T+1	G/C-1	CG>AT	CG>AT	GCTATGCCTTTTT	CCTTTTT	CGG	GCC	C	T	C>A	C>A_GCC	CG>AT_CCTTTTT	7	FALSE	FALSE
14_v.txt	33475	33475-SNV-C-A	SNV	1	C	A	15	16483	0.0910029	36.9333	rnr1D57N	FALSE	CAN	JSY14	3	rnr1D57N-Rep3	CCT	C>A	A/T+1	G/C-1	CG>AT	CG>AT	CTATGCCTTTTTT	CTTTTTT	GGA	CCT	C	T	C>A	C>A_CCT	CG>AT_CTTTTTT	7	FALSE	FALSE
14_v.txt	32717	32717-Replacement-A-GTTC	Replacement	4	A	GTTC	42	20619	0.203696	61.0893	rnr1D57N	FALSE	CAN	JSY14	3	rnr1D57N-Rep3	CAC	nope	>1bp-ins	A/T-1	none	Replac.	AGCACCACAAACC	ACAAACC	GTG	GTG	T	none	T>none	T>none_GTG	Replac._ACAAACC	7	FALSE	FALSE
14_v.txt	32717	32717-Replacement-A-GTTT	Replacement	4	A	GTTT	1	20619	0.00485	59.5	rnr1D57N	FALSE	CAN	JSY14	3	rnr1D57N-Rep3	CAC	nope	>1bp-ins	A/T-1	none	Replac.	AGCACCACAAACC	ACAAACC	GTG	GTG	T	none	T>none	T>none_GTG	Replac._ACAAACC	7	FALSE	FALSE
14_v.txt	33474	33474-MNV-CC-TA	MNV	2	CC	TA	1	16483	0.00607	37.5	rnr1D57N	FALSE	CAN	JSY14	3	rnr1D57N-Rep3	GCC	nope	>1bp-ins	>1bpdel	none	MNV	GCTATGCCTTTTT	CCTTTTT	CGG	GCC	CC	none	NA	NA_GCC	MNV_CCTTTTT	7	FALSE	FALSE
14_v.txt	32079	32079-Insertion---A	Insertion	1	-	A	3	14110	0.0212615	64	rnr1D57N	FALSE	CAN	JSY14	3	rnr1D57N-Rep3	TGC	nope	A/T+1	>1bpdel	none	A/T+1	AACCATGCAAAAA	GCAAAAA	ACG	TGC	-	T	NA	NA_TGC	A/T+1_GCAAAAA	7	FALSE	FALSE
14_v.txt	32081	32081-Insertion---A	Insertion	1	-	A	14	14110	0.0992204	64	rnr1D57N	FALSE	CAN	JSY14	3	rnr1D57N-Rep3	CAA	nope	A/T+1	>1bpdel	none	A/T+1	CCATGCAAAAAAG	AAAAAAG	GTT	CAA	-	T	NA	NA_CAA	A/T+1_AAAAAAG	7	FALSE	FALSE
14_v.txt	32498	32498-Insertion---T	Insertion	1	-	T	19	22305	0.0851827	44.2105	rnr1D57N	FALSE	CAN	JSY14	3	rnr1D57N-Rep3	CTT	nope	A/T+1	>1bpdel	none	A/T+1	AACAACTTTTTTG	TTTTTTG	GAA	CTT	-	A	NA	NA_CTT	A/T+1_TTTTTTG	7	FALSE	FALSE
14_v.txt	32597	32597-Insertion---AA	Insertion	2	-	AA	9	20619	0.0436491	40.8333	rnr1D57N	FALSE	CAN	JSY14	3	rnr1D57N-Rep3	TCA	nope	>1bp-ins	>1bpdel	none	>1bp-ins	GTTAATCAAAGAG	CAAAGAG	AGT	TCA	-	none	NA	NA_TCA	>1bp-ins_CAAAGAG	7	FALSE	FALSE
14_v.txt	32715	32715-Insertion---AAT	Insertion	3	-	AAT	44	20619	0.213395	62.7045	rnr1D57N	FALSE	CAN	JSY14	3	rnr1D57N-Rep3	ACC	nope	>1bp-ins	>1bpdel	none	>1bp-ins	CCAGCACCACAAA	CCACAAA	TGG	ACC	-	none	NA	NA_ACC	>1bp-ins_CCACAAA	7	FALSE	FALSE
14_v.txt	32718	32718-Insertion---TTC	Insertion	3	-	TTC	1	20619	0.00485	64	rnr1D57N	FALSE	CAN	JSY14	3	rnr1D57N-Rep3	ACA	nope	>1bp-ins	>1bpdel	none	>1bp-ins	GCACCACAAACCA	CAAACCA	TGT	ACA	-	none	NA	NA_ACA	>1bp-ins_CAAACCA	7	FALSE	FALSE
14_v.txt	32721	32721-Insertion---G	Insertion	1	-	G	44	20619	0.213395	59.1591	rnr1D57N	FALSE	CAN	JSY14	3	rnr1D57N-Rep3	AAC	nope	G/C+1	>1bpdel	none	G/C+1	CCACAAACCATAC	ACCATAC	TTG	AAC	-	C	NA	NA_AAC	G/C+1_ACCATAC	7	FALSE	FALSE
14_v.txt	32722	32722-Insertion---G	Insertion	1	-	G	44	20619	0.213395	61.0682	rnr1D57N	FALSE	CAN	JSY14	3	rnr1D57N-Rep3	ACC	nope	G/C+1	>1bpdel	none	G/C+1	CACAAACCATACA	CCATACA	TGG	ACC	-	C	NA	NA_ACC	G/C+1_CCATACA	7	FALSE	FALSE
14_v.txt	32842	32842-Insertion---A	Insertion	1	-	A	62	20619	0.300694	40.9355	rnr1D57N	FALSE	CAN	JSY14	3	rnr1D57N-Rep3	CAA	nope	A/T+1	>1bpdel	none	A/T+1	TTACCCAAAAAAT	AAAAAAT	GTT	CAA	-	T	NA	NA_CAA	A/T+1_AAAAAAT	7	FALSE	FALSE
14_v.txt	32337	32337-Deletion-AT--	Deletion	2	AT	-	41	22305	0.183815	62.8537	rnr1D57N	FALSE	CAN	JSY14	3	rnr1D57N-Rep3	GAT	nope	>1bp-ins	>1bpdel	none	>1bpdel	TTGAAGATATGTG	ATATGTG	CTA	GAT	AT	none	NA	NA_GAT	>1bpdel_ATATGTG	7	FALSE	FALSE
14_v.txt	33094	33094-Deletion-AT--	Deletion	2	AT	-	17	22863	0.0743559	52.8824	rnr1D57N	FALSE	CAN	JSY14	3	rnr1D57N-Rep3	GAT	nope	>1bp-ins	>1bpdel	none	>1bpdel	AATATGATATAAG	ATATAAG	CTA	GAT	AT	none	NA	NA_GAT	>1bpdel_ATATAAG	7	FALSE	FALSE
14_v.txt	31663	31663-Deletion-A--	Deletion	1	A	-	6	10140	0.0591716	38.8333	rnr1D57N	FALSE	CAN	JSY14	3	rnr1D57N-Rep3	GAA	nope	>1bp-ins	A/T-1	none	A/T-1	GCGTGGAAATGTG	AAATGTG	CTT	CTT	T	none	T>none	T>none_CTT	A/T-1_AAATGTG	7	FALSE	FALSE
14_v.txt	31723	31723-Deletion-A--	Deletion	1	A	-	13	10140	0.128205	60.5385	rnr1D57N	FALSE	CAN	JSY14	3	rnr1D57N-Rep3	CAA	nope	>1bp-ins	A/T-1	none	A/T-1	TGTCCCAAAAAGT	AAAAAGT	GTT	GTT	T	none	T>none	T>none_GTT	A/T-1_AAAAAGT	7	FALSE	FALSE
14_v.txt	31863	31863-Deletion-A--	Deletion	1	A	-	5	10140	0.0493097	38.6	rnr1D57N	FALSE	CAN	JSY14	3	rnr1D57N-Rep3	GAA	nope	>1bp-ins	A/T-1	none	A/T-1	AACAGGAAAATAG	AAAATAG	CTT	CTT	T	none	T>none	T>none_CTT	A/T-1_AAAATAG	7	FALSE	FALSE
14_v.txt	31904	31904-Deletion-T--	Deletion	1	T	-	7	10140	0.0690335	37.4286	rnr1D57N	FALSE	CAN	JSY14	3	rnr1D57N-Rep3	ATT	nope	>1bp-ins	A/T-1	none	A/T-1	ATTGAATTTTGGT	TTTTGGT	TAA	ATT	T	none	nope	nope_ATT	A/T-1_TTTTGGT	7	FALSE	FALSE
14_v.txt	31971	31971-Deletion-G--	Deletion	1	G	-	8600	14108	60.9583	37.3913	rnr1D57N	FALSE	CAN	JSY14	3	rnr1D57N-Rep3	AGC	nope	>1bp-ins	G/C-1	none	G/C-1	TAATAAGCCAAGC	GCCAAGC	TCG	TCG	C	none	C>none	C>none_TCG	G/C-1_GCCAAGC	7	FALSE	FALSE
14_v.txt	32081	32081-Deletion-A--	Deletion	1	A	-	201	14110	1.42452	62.4279	rnr1D57N	FALSE	CAN	JSY14	3	rnr1D57N-Rep3	CAA	nope	>1bp-ins	A/T-1	none	A/T-1	CCATGCAAAAAAG	AAAAAAG	GTT	GTT	T	none	T>none	T>none_GTT	A/T-1_AAAAAAG	7	FALSE	FALSE
14_v.txt	32442	32442-Deletion-A--	Deletion	1	A	-	81	22305	0.363147	54.4568	rnr1D57N	FALSE	CAN	JSY14	3	rnr1D57N-Rep3	TAA	nope	>1bp-ins	A/T-1	none	A/T-1	GGAACTAAAAGTC	AAAAGTC	ATT	ATT	T	none	T>none	T>none_ATT	A/T-1_AAAAGTC	7	FALSE	FALSE
14_v.txt	32498	32498-Deletion-T--	Deletion	1	T	-	23	22305	0.103116	41.4348	rnr1D57N	FALSE	CAN	JSY14	3	rnr1D57N-Rep3	CTT	nope	>1bp-ins	A/T-1	none	A/T-1	AACAACTTTTTTG	TTTTTTG	GAA	CTT	T	none	nope	nope_CTT	A/T-1_TTTTTTG	7	FALSE	FALSE
14_v.txt	32522	32522-Deletion-T--	Deletion	1	T	-	5	22305	0.0224165	38	rnr1D57N	FALSE	CAN	JSY14	3	rnr1D57N-Rep3	ATT	nope	>1bp-ins	A/T-1	none	A/T-1	AACGGATTTTCTG	TTTTCTG	TAA	ATT	T	none	nope	nope_ATT	A/T-1_TTTTCTG	7	FALSE	FALSE
14_v.txt	32624	32624-Deletion-C--	Deletion	1	C	-	30	20619	0.145497	44.0333	rnr1D57N	FALSE	CAN	JSY14	3	rnr1D57N-Rep3	TCC	nope	>1bp-ins	G/C-1	none	G/C-1	GAACCTCCCTTCG	CCCTTCG	AGG	TCC	C	none	nope	nope_TCC	G/C-1_CCCTTCG	7	FALSE	FALSE
14_v.txt	32631	32631-Deletion-T--	Deletion	1	T	-	77	20619	0.373442	49.7143	rnr1D57N	FALSE	CAN	JSY14	3	rnr1D57N-Rep3	GTT	nope	>1bp-ins	A/T-1	none	A/T-1	CCTTCGTTTTTAT	TTTTTAT	CAA	GTT	T	none	nope	nope_GTT	A/T-1_TTTTTAT	7	FALSE	FALSE
14_v.txt	32637	32637-Deletion-T--	Deletion	1	T	-	22	20619	0.106698	52.8636	rnr1D57N	FALSE	CAN	JSY14	3	rnr1D57N-Rep3	ATC	nope	>1bp-ins	A/T-1	none	A/T-1	TTTTTATCCTTAG	TCCTTAG	TAG	ATC	T	none	nope	nope_ATC	A/T-1_TCCTTAG	7	FALSE	FALSE
14_v.txt	32658	32658-Deletion-C--	Deletion	1	C	-	75	20619	0.363742	61.44	rnr1D57N	FALSE	CAN	JSY14	3	rnr1D57N-Rep3	ACC	nope	>1bp-ins	G/C-1	none	G/C-1	CCTGGACCCCAGG	CCCCAGG	TGG	ACC	C	none	nope	nope_ACC	G/C-1_CCCCAGG	7	FALSE	FALSE
14_v.txt	32663	32663-Deletion-G--	Deletion	1	G	-	7	20619	0.0339493	64	rnr1D57N	FALSE	CAN	JSY14	3	rnr1D57N-Rep3	AGG	nope	>1bp-ins	G/C-1	none	G/C-1	ACCCCAGGCACCT	GGCACCT	TCC	TCC	C	none	C>none	C>none_TCC	G/C-1_GGCACCT	7	FALSE	FALSE
14_v.txt	32707	32707-Deletion-C--	Deletion	1	C	-	5	20619	0.0242495	58.8	rnr1D57N	FALSE	CAN	JSY14	3	rnr1D57N-Rep3	ACC	nope	>1bp-ins	G/C-1	none	G/C-1	CGGTAACCCCAGC	CCCCAGC	TGG	ACC	C	none	nope	nope_ACC	G/C-1_CCCCAGC	7	FALSE	FALSE
14_v.txt	32717	32717-Deletion-A--	Deletion	1	A	-	1	20619	0.00485	64	rnr1D57N	FALSE	CAN	JSY14	3	rnr1D57N-Rep3	CAC	nope	>1bp-ins	A/T-1	none	A/T-1	AGCACCACAAACC	ACAAACC	GTG	GTG	T	none	T>none	T>none_GTG	A/T-1_ACAAACC	7	FALSE	FALSE
14_v.txt	32726	32726-Deletion-A--	Deletion	1	A	-	44	20619	0.213395	59.0455	rnr1D57N	FALSE	CAN	JSY14	3	rnr1D57N-Rep3	TAC	nope	>1bp-ins	A/T-1	none	A/T-1	AACCATACAAAAA	ACAAAAA	ATG	ATG	T	none	T>none	T>none_ATG	A/T-1_ACAAAAA	7	FALSE	FALSE
14_v.txt	32728	32728-Deletion-A--	Deletion	1	A	-	7	20619	0.0339493	59.4286	rnr1D57N	FALSE	CAN	JSY14	3	rnr1D57N-Rep3	CAA	nope	>1bp-ins	A/T-1	none	A/T-1	CCATACAAAAACA	AAAAACA	GTT	GTT	T	none	T>none	T>none_GTT	A/T-1_AAAAACA	7	FALSE	FALSE
14_v.txt	32839	32839-Deletion-C--	Deletion	1	C	-	15	20619	0.0727484	44.3333	rnr1D57N	FALSE	CAN	JSY14	3	rnr1D57N-Rep3	ACC	nope	>1bp-ins	G/C-1	none	G/C-1	TAATTACCCAAAA	CCCAAAA	TGG	ACC	C	none	nope	nope_ACC	G/C-1_CCCAAAA	7	FALSE	FALSE
14_v.txt	32842	32842-Deletion-A--	Deletion	1	A	-	26	20619	0.126097	40.1538	rnr1D57N	FALSE	CAN	JSY14	3	rnr1D57N-Rep3	CAA	nope	>1bp-ins	A/T-1	none	A/T-1	TTACCCAAAAAAT	AAAAAAT	GTT	GTT	T	none	T>none	T>none_GTT	A/T-1_AAAAAAT	7	FALSE	FALSE
14_v.txt	32884	32884-Deletion-A--	Deletion	1	A	-	6	22864	0.0262421	38	rnr1D57N	FALSE	CAN	JSY14	3	rnr1D57N-Rep3	CAA	nope	>1bp-ins	A/T-1	none	A/T-1	ACGTCCAAAATTG	AAAATTG	GTT	GTT	T	none	T>none	T>none_GTT	A/T-1_AAAATTG	7	FALSE	FALSE
14_v.txt	32924	32924-Deletion-A--	Deletion	1	A	-	22	22863	0.0962253	55.1364	rnr1D57N	FALSE	CAN	JSY14	3	rnr1D57N-Rep3	CAA	nope	>1bp-ins	A/T-1	none	A/T-1	CAGGGCAAAAGTG	AAAAGTG	GTT	GTT	T	none	T>none	T>none_GTT	A/T-1_AAAAGTG	7	FALSE	FALSE
14_v.txt	32935	32935-Deletion-C--	Deletion	1	C	-	5	22863	0.0218694	36.8	rnr1D57N	FALSE	CAN	JSY14	3	rnr1D57N-Rep3	GCC	nope	>1bp-ins	G/C-1	none	G/C-1	TGATTGCCCAAGA	CCCAAGA	CGG	GCC	C	none	nope	nope_GCC	G/C-1_CCCAAGA	7	FALSE	FALSE
14_v.txt	32965	32965-Deletion-C--	Deletion	1	C	-	3	22863	0.0131216	51.6667	rnr1D57N	FALSE	CAN	JSY14	3	rnr1D57N-Rep3	GCC	nope	>1bp-ins	G/C-1	none	G/C-1	CATTGGCCGCACC	CCGCACC	CGG	GCC	C	none	nope	nope_GCC	G/C-1_CCGCACC	7	FALSE	FALSE
14_v.txt	32978	32978-Deletion-T--	Deletion	1	T	-	24	22863	0.104973	62.8333	rnr1D57N	FALSE	CAN	JSY14	3	rnr1D57N-Rep3	CTG	nope	>1bp-ins	A/T-1	none	A/T-1	AAATGCTGGAGAA	TGGAGAA	GAC	CTG	T	none	nope	nope_CTG	A/T-1_TGGAGAA	7	FALSE	FALSE
14_v.txt	33072	33072-Deletion-A--	Deletion	1	A	-	18	22863	0.0787298	58.3889	rnr1D57N	FALSE	CAN	JSY14	3	rnr1D57N-Rep3	CAA	nope	>1bp-ins	A/T-1	none	A/T-1	TATGCCAAAGAAC	AAAGAAC	GTT	GTT	T	none	T>none	T>none_GTT	A/T-1_AAAGAAC	7	FALSE	FALSE
14_v.txt	33080	33080-Deletion-C--	Deletion	1	C	-	5	22863	0.0218694	47	rnr1D57N	FALSE	CAN	JSY14	3	rnr1D57N-Rep3	CCA	nope	>1bp-ins	G/C-1	none	G/C-1	AGAACCCATAAAT	CATAAAT	GGT	CCA	C	none	nope	nope_CCA	G/C-1_CATAAAT	7	FALSE	FALSE
14_v.txt	33111	33111-Deletion-G--	Deletion	1	G	-	28	22863	0.122469	41.2857	rnr1D57N	FALSE	CAN	JSY14	3	rnr1D57N-Rep3	TGG	nope	>1bp-ins	G/C-1	none	G/C-1	CCCACTGGGCCGG	GGGCCGG	ACC	ACC	C	none	C>none	C>none_ACC	G/C-1_GGGCCGG	7	FALSE	FALSE
14_v.txt	33168	33168-Deletion-C--	Deletion	1	C	-	8	22862	0.0349926	37.875	rnr1D57N	FALSE	CAN	JSY14	3	rnr1D57N-Rep3	ACC	nope	>1bp-ins	G/C-1	none	G/C-1	ATAGTACCACCAA	CCACCAA	TGG	ACC	C	none	nope	nope_ACC	G/C-1_CCACCAA	7	FALSE	FALSE
14_v.txt	33474	33474-Deletion-C--	Deletion	1	C	-	27	16483	0.163805	27.4074	rnr1D57N	FALSE	CAN	JSY14	3	rnr1D57N-Rep3	GCC	nope	>1bp-ins	G/C-1	none	G/C-1	GCTATGCCTTTTT	CCTTTTT	CGG	GCC	C	none	nope	nope_GCC	G/C-1_CCTTTTT	7	FALSE	FALSE
15_v.txt	31723	31723-SNV-A-C	SNV	1	A	C	5	25145	0.0198847	53.4004	rnr1D57N	FALSE	CAN	JSY14	4	rnr1D57N-Rep4	CAA	A>C	G/C+1	A/T-1	TA>GC	TA>GC	TGTCCCAAAAAGT	AAAAAGT	GTT	GTT	T	G	T>G	T>G_GTT	TA>GC_AAAAAGT	7	FALSE	FALSE
15_v.txt	32162	32162-SNV-A-C	SNV	1	A	C	8	64665	0.0123715	30.7519	rnr1D57N	FALSE	CAN	JSY14	4	rnr1D57N-Rep4	AAG	A>C	G/C+1	A/T-1	TA>GC	TA>GC	AGCCAAAGCGCCA	AGCGCCA	TTC	TTC	T	G	T>G	T>G_TTC	TA>GC_AGCGCCA	7	FALSE	FALSE
15_v.txt	32187	32187-SNV-A-C	SNV	1	A	C	10	64665	0.0154643	40.5	rnr1D57N	FALSE	CAN	JSY14	4	rnr1D57N-Rep4	AAC	A>C	G/C+1	A/T-1	TA>GC	TA>GC	ACGAAAACTGCAA	ACTGCAA	TTG	TTG	T	G	T>G	T>G_TTG	TA>GC_ACTGCAA	7	FALSE	FALSE
15_v.txt	32262	32262-SNV-A-C	SNV	1	A	C	15	72337	0.0207363	34.4	rnr1D57N	FALSE	CAN	JSY14	4	rnr1D57N-Rep4	AAA	A>C	G/C+1	A/T-1	TA>GC	TA>GC	AGACCAAATAAAA	AATAAAA	TTT	TTT	T	G	T>G	T>G_TTT	TA>GC_AATAAAA	7	FALSE	FALSE
15_v.txt	32283	32283-SNV-T-G	SNV	1	T	G	252	72336	0.348374	53.9921	rnr1D57N	FALSE	CAN	JSY14	4	rnr1D57N-Rep4	GTA	T>G	G/C+1	A/T-1	TA>GC	TA>GC	CCAACGTAAATAT	TAAATAT	CAT	GTA	T	C	T>G	T>G_GTA	TA>GC_TAAATAT	7	FALSE	FALSE
15_v.txt	32383	32383-SNV-A-C	SNV	1	A	C	7	72336	0.00968	54.8571	rnr1D57N	FALSE	CAN	JSY14	4	rnr1D57N-Rep4	AAG	A>C	G/C+1	A/T-1	TA>GC	TA>GC	TAATAAAGGGAGA	AGGGAGA	TTC	TTC	T	G	T>G	T>G_TTC	TA>GC_AGGGAGA	7	FALSE	FALSE
15_v.txt	32541	32541-SNV-T-G	SNV	1	T	G	248	72336	0.342845	36.7218	rnr1D57N	FALSE	CAN	JSY14	4	rnr1D57N-Rep4	TTC	T>G	G/C+1	A/T-1	TA>GC	TA>GC	GCAGCTTCACCAG	TCACCAG	AAG	TTC	T	C	T>G	T>G_TTC	TA>GC_TCACCAG	7	FALSE	FALSE
15_v.txt	32631	32631-SNV-T-G	SNV	1	T	G	6	70822	0.00847	47.6667	rnr1D57N	FALSE	CAN	JSY14	4	rnr1D57N-Rep4	GTT	T>G	G/C+1	A/T-1	TA>GC	TA>GC	CCTTCGTTTTTAT	TTTTTAT	CAA	GTT	T	C	T>G	T>G_GTT	TA>GC_TTTTTAT	7	FALSE	FALSE
15_v.txt	32673	32673-SNV-T-G	SNV	1	T	G	31	70822	0.0437717	48.9355	rnr1D57N	FALSE	CAN	JSY14	4	rnr1D57N-Rep4	GTT	T>G	G/C+1	A/T-1	TA>GC	TA>GC	CCTGGGTTTCTCC	TTTCTCC	CAA	GTT	T	C	T>G	T>G_GTT	TA>GC_TTTCTCC	7	FALSE	FALSE
15_v.txt	32728	32728-SNV-A-C	SNV	1	A	C	10	70820	0.0141203	13.5003	rnr1D57N	FALSE	CAN	JSY14	4	rnr1D57N-Rep4	CAA	A>C	G/C+1	A/T-1	TA>GC	TA>GC	CCATACAAAAACA	AAAAACA	GTT	GTT	T	G	T>G	T>G_GTT	TA>GC_AAAAACA	7	FALSE	FALSE
15_v.txt	32732	32732-SNV-A-C	SNV	1	A	C	9	70822	0.0127079	48.3333	rnr1D57N	FALSE	CAN	JSY14	4	rnr1D57N-Rep4	AAC	A>C	G/C+1	A/T-1	TA>GC	TA>GC	ACAAAAACAGTAT	ACAGTAT	TTG	TTG	T	G	T>G	T>G_TTG	TA>GC_ACAGTAT	7	FALSE	FALSE
15_v.txt	32739	32739-SNV-A-C	SNV	1	A	C	340	70822	0.480077	55.85	rnr1D57N	FALSE	CAN	JSY14	4	rnr1D57N-Rep4	TAT	A>C	G/C+1	A/T-1	TA>GC	TA>GC	CAGTATATTAGAA	ATTAGAA	ATA	ATA	T	G	T>G	T>G_ATA	TA>GC_ATTAGAA	7	FALSE	FALSE
15_v.txt	32799	32799-SNV-T-G	SNV	1	T	G	25	70822	0.0352998	39.2404	rnr1D57N	FALSE	CAN	JSY14	4	rnr1D57N-Rep4	GTA	T>G	G/C+1	A/T-1	TA>GC	TA>GC	TCACCGTAATATT	TAATATT	CAT	GTA	T	C	T>G	T>G_GTA	TA>GC_TAATATT	7	FALSE	FALSE
15_v.txt	32842	32842-SNV-A-C	SNV	1	A	C	6	70822	0.00847	38.0006	rnr1D57N	FALSE	CAN	JSY14	4	rnr1D57N-Rep4	CAA	A>C	G/C+1	A/T-1	TA>GC	TA>GC	TTACCCAAAAAAT	AAAAAAT	GTT	GTT	T	G	T>G	T>G_GTT	TA>GC_AAAAAAT	7	FALSE	FALSE
15_v.txt	32884	32884-SNV-A-C	SNV	1	A	C	4	75142	0.00532	30.4995	rnr1D57N	FALSE	CAN	JSY14	4	rnr1D57N-Rep4	CAA	A>C	G/C+1	A/T-1	TA>GC	TA>GC	ACGTCCAAAATTG	AAAATTG	GTT	GTT	T	G	T>G	T>G_GTT	TA>GC_AAAATTG	7	FALSE	FALSE
15_v.txt	33087	33087-SNV-A-C	SNV	1	A	C	660	75142	0.878337	52.047	rnr1D57N	FALSE	CAN	JSY14	4	rnr1D57N-Rep4	TAA	A>C	G/C+1	A/T-1	TA>GC	TA>GC	ATAAATAAATATG	AAATATG	ATT	ATT	T	G	T>G	T>G_ATT	TA>GC_AAATATG	7	FALSE	FALSE
15_v.txt	33204	33204-SNV-A-C	SNV	1	A	C	32	61063	0.0524049	29.0003	rnr1D57N	FALSE	CAN	JSY14	4	rnr1D57N-Rep4	AAG	A>C	G/C+1	A/T-1	TA>GC	TA>GC	TGCTTAAGCTCTC	AGCTCTC	TTC	TTC	T	G	T>G	T>G_TTC	TA>GC_AGCTCTC	7	FALSE	FALSE
15_v.txt	33269	33269-SNV-A-C	SNV	1	A	C	463	61063	0.758233	15.784	rnr1D57N	FALSE	CAN	JSY14	4	rnr1D57N-Rep4	TAG	A>C	G/C+1	A/T-1	TA>GC	TA>GC	CTCCATAGAGAAC	AGAGAAC	ATC	ATC	T	G	T>G	T>G_ATC	TA>GC_AGAGAAC	7	FALSE	FALSE
15_v.txt	33476	33476-SNV-T-G	SNV	1	T	G	5	61062	0.00819	36.2	rnr1D57N	FALSE	CAN	JSY14	4	rnr1D57N-Rep4	CTT	T>G	G/C+1	A/T-1	TA>GC	TA>GC	TATGCCTTTTTTT	TTTTTTT	GAA	CTT	T	C	T>G	T>G_CTT	TA>GC_TTTTTTT	7	FALSE	FALSE
15_v.txt	31723	31723-SNV-A-G	SNV	1	A	G	8	25145	0.0318155	53.2501	rnr1D57N	FALSE	CAN	JSY14	4	rnr1D57N-Rep4	CAA	A>G	G/C+1	A/T-1	TA>CG	TA>CG	TGTCCCAAAAAGT	AAAAAGT	GTT	GTT	T	C	T>C	T>C_GTT	TA>CG_AAAAAGT	7	FALSE	FALSE
15_v.txt	32081	32081-SNV-A-G	SNV	1	A	G	15	64727	0.0231743	61.2	rnr1D57N	FALSE	CAN	JSY14	4	rnr1D57N-Rep4	CAA	A>G	G/C+1	A/T-1	TA>CG	TA>CG	CCATGCAAAAAAG	AAAAAAG	GTT	GTT	T	C	T>C	T>C_GTT	TA>CG_AAAAAAG	7	FALSE	FALSE
15_v.txt	32160	32160-SNV-A-G	SNV	1	A	G	16	64665	0.0247429	38.9999	rnr1D57N	FALSE	CAN	JSY14	4	rnr1D57N-Rep4	CAA	A>G	G/C+1	A/T-1	TA>CG	TA>CG	TAAGCCAAAGCGC	AAAGCGC	GTT	GTT	T	C	T>C	T>C_GTT	TA>CG_AAAGCGC	7	FALSE	FALSE
15_v.txt	32161	32161-SNV-A-G	SNV	1	A	G	17	64665	0.0262893	34.2884	rnr1D57N	FALSE	CAN	JSY14	4	rnr1D57N-Rep4	AAA	A>G	G/C+1	A/T-1	TA>CG	TA>CG	AAGCCAAAGCGCC	AAGCGCC	TTT	TTT	T	C	T>C	T>C_TTT	TA>CG_AAGCGCC	7	FALSE	FALSE
15_v.txt	32490	32490-SNV-A-G	SNV	1	A	G	26	72335	0.0359439	40.5769	rnr1D57N	FALSE	CAN	JSY14	4	rnr1D57N-Rep4	GAA	A>G	G/C+1	A/T-1	TA>CG	TA>CG	ATACGGAAAACAA	AAAACAA	CTT	CTT	T	C	T>C	T>C_CTT	TA>CG_AAAACAA	7	FALSE	FALSE
15_v.txt	32498	32498-SNV-T-C	SNV	1	T	C	6	72336	0.0083	29.1667	rnr1D57N	FALSE	CAN	JSY14	4	rnr1D57N-Rep4	CTT	T>C	G/C+1	A/T-1	TA>CG	TA>CG	AACAACTTTTTTG	TTTTTTG	GAA	CTT	T	G	T>C	T>C_CTT	TA>CG_TTTTTTG	7	FALSE	FALSE
15_v.txt	32522	32522-SNV-T-C	SNV	1	T	C	8	72336	0.0110595	37.125	rnr1D57N	FALSE	CAN	JSY14	4	rnr1D57N-Rep4	ATT	T>C	G/C+1	A/T-1	TA>CG	TA>CG	AACGGATTTTCTG	TTTTCTG	TAA	ATT	T	G	T>C	T>C_ATT	TA>CG_TTTTCTG	7	FALSE	FALSE
15_v.txt	32583	32583-SNV-A-G	SNV	1	A	G	49	70822	0.0691875	37.551	rnr1D57N	FALSE	CAN	JSY14	4	rnr1D57N-Rep4	GAA	A>G	G/C+1	A/T-1	TA>CG	TA>CG	AATGTGAAGGCAG	AAGGCAG	CTT	CTT	T	C	T>C	T>C_CTT	TA>CG_AAGGCAG	7	FALSE	FALSE
15_v.txt	32675	32675-SNV-T-C	SNV	1	T	C	38	70822	0.0536556	54.7895	rnr1D57N	FALSE	CAN	JSY14	4	rnr1D57N-Rep4	TTC	T>C	G/C+1	A/T-1	TA>CG	TA>CG	TGGGTTTCTCCAA	TCTCCAA	AAG	TTC	T	G	T>C	T>C_TTC	TA>CG_TCTCCAA	7	FALSE	FALSE
15_v.txt	32677	32677-SNV-T-C	SNV	1	T	C	26	70818	0.0367138	46.3461	rnr1D57N	FALSE	CAN	JSY14	4	rnr1D57N-Rep4	CTC	T>C	G/C+1	A/T-1	TA>CG	TA>CG	GGTTTCTCCAATA	TCCAATA	GAG	CTC	T	G	T>C	T>C_CTC	TA>CG_TCCAATA	7	FALSE	FALSE
15_v.txt	32680	32680-SNV-A-G	SNV	1	A	G	24	70822	0.0338878	61.3749	rnr1D57N	FALSE	CAN	JSY14	4	rnr1D57N-Rep4	CAA	A>G	G/C+1	A/T-1	TA>CG	TA>CG	TTCTCCAATAACG	AATAACG	GTT	GTT	T	C	T>C	T>C_GTT	TA>CG_AATAACG	7	FALSE	FALSE
15_v.txt	32799	32799-SNV-T-C	SNV	1	T	C	22	70822	0.0310638	41.2729	rnr1D57N	FALSE	CAN	JSY14	4	rnr1D57N-Rep4	GTA	T>C	G/C+1	A/T-1	TA>CG	TA>CG	TCACCGTAATATT	TAATATT	CAT	GTA	T	G	T>C	T>C_GTA	TA>CG_TAATATT	7	FALSE	FALSE
15_v.txt	32800	32800-SNV-A-G	SNV	1	A	G	16	70822	0.0225919	34.1874	rnr1D57N	FALSE	CAN	JSY14	4	rnr1D57N-Rep4	TAA	A>G	G/C+1	A/T-1	TA>CG	TA>CG	CACCGTAATATTT	AATATTT	ATT	ATT	T	C	T>C	T>C_ATT	TA>CG_AATATTT	7	FALSE	FALSE
15_v.txt	32842	32842-SNV-A-G	SNV	1	A	G	16	70822	0.0225919	34.8751	rnr1D57N	FALSE	CAN	JSY14	4	rnr1D57N-Rep4	CAA	A>G	G/C+1	A/T-1	TA>CG	TA>CG	TTACCCAAAAAAT	AAAAAAT	GTT	GTT	T	C	T>C	T>C_GTT	TA>CG_AAAAAAT	7	FALSE	FALSE
15_v.txt	32929	32929-SNV-T-C	SNV	1	T	C	25	75142	0.0332703	38.7601	rnr1D57N	FALSE	CAN	JSY14	4	rnr1D57N-Rep4	GTG	T>C	G/C+1	A/T-1	TA>CG	TA>CG	CAAAAGTGATTGC	TGATTGC	CAC	GTG	T	G	T>C	T>C_GTG	TA>CG_TGATTGC	7	FALSE	FALSE
15_v.txt	33074	33074-SNV-A-G	SNV	1	A	G	61	75142	0.0811796	45.8525	rnr1D57N	FALSE	CAN	JSY14	4	rnr1D57N-Rep4	AAG	A>G	G/C+1	A/T-1	TA>CG	TA>CG	TGCCAAAGAACCC	AGAACCC	TTC	TTC	T	C	T>C	T>C_TTC	TA>CG_AGAACCC	7	FALSE	FALSE
15_v.txt	33150	33150-SNV-A-G	SNV	1	A	G	50	75141	0.0665416	35.3999	rnr1D57N	FALSE	CAN	JSY14	4	rnr1D57N-Rep4	AAG	A>G	G/C+1	A/T-1	TA>CG	TA>CG	ATGAAAAGACCTG	AGACCTG	TTC	TTC	T	C	T>C	T>C_TTC	TA>CG_AGACCTG	7	FALSE	FALSE
15_v.txt	33211	33211-SNV-T-C	SNV	1	T	C	201	61063	0.329168	37.6766	rnr1D57N	FALSE	CAN	JSY14	4	rnr1D57N-Rep4	CTC	T>C	G/C+1	A/T-1	TA>CG	TA>CG	GCTCTCTCTTCAC	TCTTCAC	GAG	CTC	T	G	T>C	T>C_CTC	TA>CG_TCTTCAC	7	FALSE	FALSE
15_v.txt	33326	33326-SNV-T-C	SNV	1	T	C	8	61060	0.0131019	44.5	rnr1D57N	FALSE	CAN	JSY14	4	rnr1D57N-Rep4	CTT	T>C	G/C+1	A/T-1	TA>CG	TA>CG	CAATTCTTTACTT	TTTACTT	GAA	CTT	T	G	T>C	T>C_CTT	TA>CG_TTTACTT	7	FALSE	FALSE
15_v.txt	33369	33369-SNV-T-C	SNV	1	T	C	8	61063	0.0131012	49.375	rnr1D57N	FALSE	CAN	JSY14	4	rnr1D57N-Rep4	GTG	T>C	G/C+1	A/T-1	TA>CG	TA>CG	CTGTGGTGTGTTT	TGTGTTT	CAC	GTG	T	G	T>C	T>C_GTG	TA>CG_TGTGTTT	7	FALSE	FALSE
15_v.txt	33476	33476-SNV-T-C	SNV	1	T	C	95	61062	0.15558	31.2526	rnr1D57N	FALSE	CAN	JSY14	4	rnr1D57N-Rep4	CTT	T>C	G/C+1	A/T-1	TA>CG	TA>CG	TATGCCTTTTTTT	TTTTTTT	GAA	CTT	T	G	T>C	T>C_CTT	TA>CG_TTTTTTT	7	FALSE	FALSE
15_v.txt	31996	31996-SNV-T-A	SNV	1	T	A	79	64727	0.122051	53.8734	rnr1D57N	FALSE	CAN	JSY14	4	rnr1D57N-Rep4	TTA	T>A	A/T+1	A/T-1	TA>AT	TA>AT	TAGCTTTAAATGG	TAAATGG	AAT	TTA	T	T	T>A	T>A_TTA	TA>AT_TAAATGG	7	FALSE	FALSE
15_v.txt	32081	32081-SNV-A-T	SNV	1	A	T	6	64727	0.00927	62.4997	rnr1D57N	FALSE	CAN	JSY14	4	rnr1D57N-Rep4	CAA	A>T	A/T+1	A/T-1	TA>AT	TA>AT	CCATGCAAAAAAG	AAAAAAG	GTT	GTT	T	A	T>A	T>A_GTT	TA>AT_AAAAAAG	7	FALSE	FALSE
15_v.txt	32160	32160-SNV-A-T	SNV	1	A	T	5	64665	0.00773	52.1996	rnr1D57N	FALSE	CAN	JSY14	4	rnr1D57N-Rep4	CAA	A>T	A/T+1	A/T-1	TA>AT	TA>AT	TAAGCCAAAGCGC	AAAGCGC	GTT	GTT	T	A	T>A	T>A_GTT	TA>AT_AAAGCGC	7	FALSE	FALSE
15_v.txt	32161	32161-SNV-A-T	SNV	1	A	T	4	64665	0.00619	63.9986	rnr1D57N	FALSE	CAN	JSY14	4	rnr1D57N-Rep4	AAA	A>T	A/T+1	A/T-1	TA>AT	TA>AT	AAGCCAAAGCGCC	AAGCGCC	TTT	TTT	T	A	T>A	T>A_TTT	TA>AT_AAGCGCC	7	FALSE	FALSE
15_v.txt	32383	32383-SNV-A-T	SNV	1	A	T	17	72336	0.0235014	61.1765	rnr1D57N	FALSE	CAN	JSY14	4	rnr1D57N-Rep4	AAG	A>T	A/T+1	A/T-1	TA>AT	TA>AT	TAATAAAGGGAGA	AGGGAGA	TTC	TTC	T	A	T>A	T>A_TTC	TA>AT_AGGGAGA	7	FALSE	FALSE
15_v.txt	32456	32456-SNV-T-A	SNV	1	T	A	11	72336	0.0152068	50.7267	rnr1D57N	FALSE	CAN	JSY14	4	rnr1D57N-Rep4	ATA	T>A	A/T+1	A/T-1	TA>AT	TA>AT	AATGAATAATAGA	TAATAGA	TAT	ATA	T	T	T>A	T>A_ATA	TA>AT_TAATAGA	7	FALSE	FALSE
15_v.txt	32459	32459-SNV-T-A	SNV	1	T	A	14	72336	0.0193541	39.7111	rnr1D57N	FALSE	CAN	JSY14	4	rnr1D57N-Rep4	ATA	T>A	A/T+1	A/T-1	TA>AT	TA>AT	GAATAATAGAGAG	TAGAGAG	TAT	ATA	T	T	T>A	T>A_ATA	TA>AT_TAGAGAG	7	FALSE	FALSE
15_v.txt	32498	32498-SNV-T-A	SNV	1	T	A	7	72336	0.00968	55.7141	rnr1D57N	FALSE	CAN	JSY14	4	rnr1D57N-Rep4	CTT	T>A	A/T+1	A/T-1	TA>AT	TA>AT	AACAACTTTTTTG	TTTTTTG	GAA	CTT	T	T	T>A	T>A_CTT	TA>AT_TTTTTTG	7	FALSE	FALSE
15_v.txt	32522	32522-SNV-T-A	SNV	1	T	A	56	72336	0.0774165	42.2494	rnr1D57N	FALSE	CAN	JSY14	4	rnr1D57N-Rep4	ATT	T>A	A/T+1	A/T-1	TA>AT	TA>AT	AACGGATTTTCTG	TTTTCTG	TAA	ATT	T	T	T>A	T>A_ATT	TA>AT_TTTTCTG	7	FALSE	FALSE
15_v.txt	32677	32677-SNV-T-A	SNV	1	T	A	17	70818	0.0240052	59.9402	rnr1D57N	FALSE	CAN	JSY14	4	rnr1D57N-Rep4	CTC	T>A	A/T+1	A/T-1	TA>AT	TA>AT	GGTTTCTCCAATA	TCCAATA	GAG	CTC	T	T	T>A	T>A_CTC	TA>AT_TCCAATA	7	FALSE	FALSE
15_v.txt	32680	32680-SNV-A-T	SNV	1	A	T	4	70822	0.00565	63.4999	rnr1D57N	FALSE	CAN	JSY14	4	rnr1D57N-Rep4	CAA	A>T	A/T+1	A/T-1	TA>AT	TA>AT	TTCTCCAATAACG	AATAACG	GTT	GTT	T	A	T>A	T>A_GTT	TA>AT_AATAACG	7	FALSE	FALSE
15_v.txt	32717	32717-SNV-A-T	SNV	1	A	T	55	70822	0.0776595	54.7455	rnr1D57N	FALSE	CAN	JSY14	4	rnr1D57N-Rep4	CAC	A>T	A/T+1	A/T-1	TA>AT	TA>AT	AGCACCACAAACC	ACAAACC	GTG	GTG	T	A	T>A	T>A_GTG	TA>AT_ACAAACC	7	FALSE	FALSE
15_v.txt	32799	32799-SNV-T-A	SNV	1	T	A	11	70822	0.0155319	38.0004	rnr1D57N	FALSE	CAN	JSY14	4	rnr1D57N-Rep4	GTA	T>A	A/T+1	A/T-1	TA>AT	TA>AT	TCACCGTAATATT	TAATATT	CAT	GTA	T	T	T>A	T>A_GTA	TA>AT_TAATATT	7	FALSE	FALSE
15_v.txt	32800	32800-SNV-A-T	SNV	1	A	T	44	70822	0.0621276	50.658	rnr1D57N	FALSE	CAN	JSY14	4	rnr1D57N-Rep4	TAA	A>T	A/T+1	A/T-1	TA>AT	TA>AT	CACCGTAATATTT	AATATTT	ATT	ATT	T	A	T>A	T>A_ATT	TA>AT_AATATTT	7	FALSE	FALSE
15_v.txt	32929	32929-SNV-T-A	SNV	1	T	A	17	75142	0.0226238	42.9427	rnr1D57N	FALSE	CAN	JSY14	4	rnr1D57N-Rep4	GTG	T>A	A/T+1	A/T-1	TA>AT	TA>AT	CAAAAGTGATTGC	TGATTGC	CAC	GTG	T	T	T>A	T>A_GTG	TA>AT_TGATTGC	7	FALSE	FALSE
15_v.txt	33072	33072-SNV-A-T	SNV	1	A	T	35	75142	0.0465785	50.9429	rnr1D57N	FALSE	CAN	JSY14	4	rnr1D57N-Rep4	CAA	A>T	A/T+1	A/T-1	TA>AT	TA>AT	TATGCCAAAGAAC	AAAGAAC	GTT	GTT	T	A	T>A	T>A_GTT	TA>AT_AAAGAAC	7	FALSE	FALSE
15_v.txt	33150	33150-SNV-A-T	SNV	1	A	T	5	75141	0.00665	31.7998	rnr1D57N	FALSE	CAN	JSY14	4	rnr1D57N-Rep4	AAG	A>T	A/T+1	A/T-1	TA>AT	TA>AT	ATGAAAAGACCTG	AGACCTG	TTC	TTC	T	A	T>A	T>A_TTC	TA>AT_AGACCTG	7	FALSE	FALSE
15_v.txt	33317	33317-SNV-A-T	SNV	1	A	T	144	61063	0.235822	58.3958	rnr1D57N	FALSE	CAN	JSY14	4	rnr1D57N-Rep4	GAT	A>T	A/T+1	A/T-1	TA>AT	TA>AT	CAATGGATACAAT	ATACAAT	CTA	CTA	T	A	T>A	T>A_CTA	TA>AT_ATACAAT	7	FALSE	FALSE
15_v.txt	33326	33326-SNV-T-A	SNV	1	T	A	4	61060	0.00655	40.7498	rnr1D57N	FALSE	CAN	JSY14	4	rnr1D57N-Rep4	CTT	T>A	A/T+1	A/T-1	TA>AT	TA>AT	CAATTCTTTACTT	TTTACTT	GAA	CTT	T	T	T>A	T>A_CTT	TA>AT_TTTACTT	7	FALSE	FALSE
15_v.txt	33369	33369-SNV-T-A	SNV	1	T	A	9	61063	0.0147389	39.7774	rnr1D57N	FALSE	CAN	JSY14	4	rnr1D57N-Rep4	GTG	T>A	A/T+1	A/T-1	TA>AT	TA>AT	CTGTGGTGTGTTT	TGTGTTT	CAC	GTG	T	T	T>A	T>A_GTG	TA>AT_TGTGTTT	7	FALSE	FALSE
15_v.txt	33476	33476-SNV-T-A	SNV	1	T	A	9	61062	0.0147391	37.4444	rnr1D57N	FALSE	CAN	JSY14	4	rnr1D57N-Rep4	CTT	T>A	A/T+1	A/T-1	TA>AT	TA>AT	TATGCCTTTTTTT	TTTTTTT	GAA	CTT	T	T	T>A	T>A_CTT	TA>AT_TTTTTTT	7	FALSE	FALSE
15_v.txt	31650	31650-SNV-C-T	SNV	1	C	T	40	25145	0.159077	35.5	rnr1D57N	FALSE	CAN	JSY14	4	rnr1D57N-Rep4	GCG	C>T	A/T+1	G/C-1	CG>TA	CG>TA	AGAATGCGAAATG	CGAAATG	CGC	GCG	C	A	C>T	C>T_GCG	CG>TA_CGAAATG	7	FALSE	FALSE
15_v.txt	31658	31658-SNV-C-T	SNV	1	C	T	29	25145	0.115331	35.3103	rnr1D57N	FALSE	CAN	JSY14	4	rnr1D57N-Rep4	GCG	C>T	A/T+1	G/C-1	CG>TA	CG>TA	AAATGGCGTGGAA	CGTGGAA	CGC	GCG	C	A	C>T	C>T_GCG	CG>TA_CGTGGAA	7	FALSE	FALSE
15_v.txt	31830	31830-SNV-C-T	SNV	1	C	T	21	25145	0.0835156	52.2857	rnr1D57N	FALSE	CAN	JSY14	4	rnr1D57N-Rep4	GCA	C>T	A/T+1	G/C-1	CG>TA	CG>TA	AATATGCATTGAA	CATTGAA	CGT	GCA	C	A	C>T	C>T_GCA	CG>TA_CATTGAA	7	FALSE	FALSE
15_v.txt	31834	31834-SNV-G-A	SNV	1	G	A	26	25145	0.1034	45.4615	rnr1D57N	FALSE	CAN	JSY14	4	rnr1D57N-Rep4	TGA	G>A	A/T+1	G/C-1	CG>TA	CG>TA	TGCATTGAAATAA	GAAATAA	ACT	ACT	C	T	C>T	C>T_ACT	CG>TA_GAAATAA	7	FALSE	FALSE
15_v.txt	31879	31879-SNV-C-T	SNV	1	C	T	20	25145	0.0795387	44	rnr1D57N	FALSE	CAN	JSY14	4	rnr1D57N-Rep4	GCG	C>T	A/T+1	G/C-1	CG>TA	CG>TA	TATAGGCGGCAGC	CGGCAGC	CGC	GCG	C	A	C>T	C>T_GCG	CG>TA_CGGCAGC	7	FALSE	FALSE
15_v.txt	31881	31881-SNV-G-A	SNV	1	G	A	21	25145	0.0835156	45.8567	rnr1D57N	FALSE	CAN	JSY14	4	rnr1D57N-Rep4	GGC	G>A	A/T+1	G/C-1	CG>TA	CG>TA	TAGGCGGCAGCAA	GCAGCAA	CCG	CCG	C	T	C>T	C>T_CCG	CG>TA_GCAGCAA	7	FALSE	FALSE
15_v.txt	31882	31882-SNV-C-T	SNV	1	C	T	24	25145	0.0954464	38.4955	rnr1D57N	FALSE	CAN	JSY14	4	rnr1D57N-Rep4	GCA	C>T	A/T+1	G/C-1	CG>TA	CG>TA	AGGCGGCAGCAAA	CAGCAAA	CGT	GCA	C	A	C>T	C>T_GCA	CG>TA_CAGCAAA	7	FALSE	FALSE
15_v.txt	31911	31911-SNV-G-A	SNV	1	G	A	21	25145	0.0835156	41.8571	rnr1D57N	FALSE	CAN	JSY14	4	rnr1D57N-Rep4	TGC	G>A	A/T+1	G/C-1	CG>TA	CG>TA	TTTGGTGCAAAAG	GCAAAAG	ACG	ACG	C	T	C>T	C>T_ACG	CG>TA_GCAAAAG	7	FALSE	FALSE
15_v.txt	31920	31920-SNV-G-A	SNV	1	G	A	21	25145	0.0835156	36.0952	rnr1D57N	FALSE	CAN	JSY14	4	rnr1D57N-Rep4	CGT	G>A	A/T+1	G/C-1	CG>TA	CG>TA	AAAGCCGTGAAAC	GTGAAAC	GCA	GCA	C	T	C>T	C>T_GCA	CG>TA_GTGAAAC	7	FALSE	FALSE
15_v.txt	31960	31960-SNV-C-T	SNV	1	C	T	71	64726	0.109693	36.3944	rnr1D57N	FALSE	CAN	JSY14	4	rnr1D57N-Rep4	GCC	C>T	A/T+1	G/C-1	CG>TA	CG>TA	ATGTGGCCGCATA	CCGCATA	CGG	GCC	C	A	C>T	C>T_GCC	CG>TA_CCGCATA	7	FALSE	FALSE
15_v.txt	31962	31962-SNV-G-A	SNV	1	G	A	90	64726	0.139048	36.7111	rnr1D57N	FALSE	CAN	JSY14	4	rnr1D57N-Rep4	CGC	G>A	A/T+1	G/C-1	CG>TA	CG>TA	GTGGCCGCATAAT	GCATAAT	GCG	GCG	C	T	C>T	C>T_GCG	CG>TA_GCATAAT	7	FALSE	FALSE
15_v.txt	31971	31971-SNV-G-A	SNV	1	G	A	18	64727	0.0278091	29.8333	rnr1D57N	FALSE	CAN	JSY14	4	rnr1D57N-Rep4	AGC	G>A	A/T+1	G/C-1	CG>TA	CG>TA	TAATAAGCCAAGC	GCCAAGC	TCG	TCG	C	T	C>T	C>T_TCG	CG>TA_GCCAAGC	7	FALSE	FALSE
15_v.txt	31977	31977-SNV-C-T	SNV	1	C	T	52	64727	0.0803374	40.2885	rnr1D57N	FALSE	CAN	JSY14	4	rnr1D57N-Rep4	GCC	C>T	A/T+1	G/C-1	CG>TA	CG>TA	GCCAAGCCGGGCA	CCGGGCA	CGG	GCC	C	A	C>T	C>T_GCC	CG>TA_CCGGGCA	7	FALSE	FALSE
15_v.txt	31980	31980-SNV-G-A	SNV	1	G	A	80	64725	0.1236	46.4459	rnr1D57N	FALSE	CAN	JSY14	4	rnr1D57N-Rep4	GGG	G>A	A/T+1	G/C-1	CG>TA	CG>TA	AAGCCGGGCATTA	GGCATTA	CCC	CCC	C	T	C>T	C>T_CCC	CG>TA_GGCATTA	7	FALSE	FALSE
15_v.txt	31981	31981-SNV-G-A	SNV	1	G	A	41	64727	0.063343	47.317	rnr1D57N	FALSE	CAN	JSY14	4	rnr1D57N-Rep4	GGC	G>A	A/T+1	G/C-1	CG>TA	CG>TA	AGCCGGGCATTAA	GCATTAA	CCG	CCG	C	T	C>T	C>T_CCG	CG>TA_GCATTAA	7	FALSE	FALSE
15_v.txt	32056	32056-SNV-G-A	SNV	1	G	A	7	64727	0.0108147	48.1304	rnr1D57N	FALSE	CAN	JSY14	4	rnr1D57N-Rep4	TGC	G>A	A/T+1	G/C-1	CG>TA	CG>TA	TGATGTGCGAGAT	GCGAGAT	ACG	ACG	C	T	C>T	C>T_ACG	CG>TA_GCGAGAT	7	FALSE	FALSE
15_v.txt	32057	32057-SNV-C-T	SNV	1	C	T	54	64726	0.0834286	57.5735	rnr1D57N	FALSE	CAN	JSY14	4	rnr1D57N-Rep4	GCG	C>T	A/T+1	G/C-1	CG>TA	CG>TA	GATGTGCGAGATT	CGAGATT	CGC	GCG	C	A	C>T	C>T_GCG	CG>TA_CGAGATT	7	FALSE	FALSE
15_v.txt	32088	32088-SNV-C-T	SNV	1	C	T	84	64727	0.129776	59.369	rnr1D57N	FALSE	CAN	JSY14	4	rnr1D57N-Rep4	GCC	C>T	A/T+1	G/C-1	CG>TA	CG>TA	AAAAAGCCTGCAA	CCTGCAA	CGG	GCC	C	A	C>T	C>T_GCC	CG>TA_CCTGCAA	7	FALSE	FALSE
15_v.txt	32092	32092-SNV-C-T	SNV	1	C	T	64	64727	0.0988768	58.8906	rnr1D57N	FALSE	CAN	JSY14	4	rnr1D57N-Rep4	GCA	C>T	A/T+1	G/C-1	CG>TA	CG>TA	AGCCTGCAACACC	CAACACC	CGT	GCA	C	A	C>T	C>T_GCA	CG>TA_CAACACC	7	FALSE	FALSE
15_v.txt	32114	32114-SNV-C-T	SNV	1	C	T	52	64727	0.0803374	58.2692	rnr1D57N	FALSE	CAN	JSY14	4	rnr1D57N-Rep4	GCC	C>T	A/T+1	G/C-1	CG>TA	CG>TA	TAATAGCCATTCG	CCATTCG	CGG	GCC	C	A	C>T	C>T_GCC	CG>TA_CCATTCG	7	FALSE	FALSE
15_v.txt	32157	32157-SNV-G-A	SNV	1	G	A	30	64664	0.0463937	44.0334	rnr1D57N	FALSE	CAN	JSY14	4	rnr1D57N-Rep4	AGC	G>A	A/T+1	G/C-1	CG>TA	CG>TA	ATGTAAGCCAAAG	GCCAAAG	TCG	TCG	C	T	C>T	C>T_TCG	CG>TA_GCCAAAG	7	FALSE	FALSE
15_v.txt	32158	32158-SNV-C-T	SNV	1	C	T	20	64665	0.0309286	43.1466	rnr1D57N	FALSE	CAN	JSY14	4	rnr1D57N-Rep4	GCC	C>T	A/T+1	G/C-1	CG>TA	CG>TA	TGTAAGCCAAAGC	CCAAAGC	CGG	GCC	C	A	C>T	C>T_GCC	CG>TA_CCAAAGC	7	FALSE	FALSE
15_v.txt	32164	32164-SNV-C-T	SNV	1	C	T	22	64665	0.0340215	46.9996	rnr1D57N	FALSE	CAN	JSY14	4	rnr1D57N-Rep4	GCG	C>T	A/T+1	G/C-1	CG>TA	CG>TA	CCAAAGCGCCAAA	CGCCAAA	CGC	GCG	C	A	C>T	C>T_GCG	CG>TA_CGCCAAA	7	FALSE	FALSE
15_v.txt	32165	32165-SNV-G-A	SNV	1	G	A	62	64665	0.0958788	43.4182	rnr1D57N	FALSE	CAN	JSY14	4	rnr1D57N-Rep4	CGC	G>A	A/T+1	G/C-1	CG>TA	CG>TA	CAAAGCGCCAAAT	GCCAAAT	GCG	GCG	C	T	C>T	C>T_GCG	CG>TA_GCCAAAT	7	FALSE	FALSE
15_v.txt	32166	32166-SNV-C-T	SNV	1	C	T	62	64665	0.0958788	47.1776	rnr1D57N	FALSE	CAN	JSY14	4	rnr1D57N-Rep4	GCC	C>T	A/T+1	G/C-1	CG>TA	CG>TA	AAAGCGCCAAATG	CCAAATG	CGG	GCC	C	A	C>T	C>T_GCC	CG>TA_CCAAATG	7	FALSE	FALSE
15_v.txt	32173	32173-SNV-C-T	SNV	1	C	T	50	64665	0.0773216	46.62	rnr1D57N	FALSE	CAN	JSY14	4	rnr1D57N-Rep4	GCA	C>T	A/T+1	G/C-1	CG>TA	CG>TA	CAAATGCAGCAGT	CAGCAGT	CGT	GCA	C	A	C>T	C>T_GCA	CG>TA_CAGCAGT	7	FALSE	FALSE
15_v.txt	32176	32176-SNV-C-T	SNV	1	C	T	44	64665	0.068043	42.9773	rnr1D57N	FALSE	CAN	JSY14	4	rnr1D57N-Rep4	GCA	C>T	A/T+1	G/C-1	CG>TA	CG>TA	ATGCAGCAGTAAC	CAGTAAC	CGT	GCA	C	A	C>T	C>T_GCA	CG>TA_CAGTAAC	7	FALSE	FALSE
15_v.txt	32271	32271-SNV-C-T	SNV	1	C	T	93	72336	0.128567	33.7603	rnr1D57N	FALSE	CAN	JSY14	4	rnr1D57N-Rep4	ACG	C>T	A/T+1	G/C-1	CG>TA	CG>TA	AAAATACGGGAAC	CGGGAAC	TGC	ACG	C	A	C>T	C>T_ACG	CG>TA_CGGGAAC	7	FALSE	FALSE
15_v.txt	32299	32299-SNV-C-T	SNV	1	C	T	180	72336	0.248839	52.9222	rnr1D57N	FALSE	CAN	JSY14	4	rnr1D57N-Rep4	GCG	C>T	A/T+1	G/C-1	CG>TA	CG>TA	AATTTGCGGCAGA	CGGCAGA	CGC	GCG	C	A	C>T	C>T_GCG	CG>TA_CGGCAGA	7	FALSE	FALSE
15_v.txt	32301	32301-SNV-G-A	SNV	1	G	A	45	72336	0.0622097	48.6889	rnr1D57N	FALSE	CAN	JSY14	4	rnr1D57N-Rep4	GGC	G>A	A/T+1	G/C-1	CG>TA	CG>TA	TTTGCGGCAGAAA	GCAGAAA	CCG	CCG	C	T	C>T	C>T_CCG	CG>TA_GCAGAAA	7	FALSE	FALSE
15_v.txt	32413	32413-SNV-G-A	SNV	1	G	A	347	72336	0.479706	58.0375	rnr1D57N	FALSE	CAN	JSY14	4	rnr1D57N-Rep4	TGT	G>A	A/T+1	G/C-1	CG>TA	CG>TA	TAGATTGTGTTAG	GTGTTAG	ACA	ACA	C	T	C>T	C>T_ACA	CG>TA_GTGTTAG	7	FALSE	FALSE
15_v.txt	32449	32449-SNV-C-T	SNV	1	C	T	394	72336	0.54468	53.0863	rnr1D57N	FALSE	CAN	JSY14	4	rnr1D57N-Rep4	CCA	C>T	A/T+1	G/C-1	CG>TA	CG>TA	AAAGTCCAATGAA	CAATGAA	GGT	CCA	C	A	C>T	C>T_CCA	CG>TA_CAATGAA	7	FALSE	FALSE
15_v.txt	32466	32466-SNV-C-T	SNV	1	C	T	80	72336	0.110595	49.4125	rnr1D57N	FALSE	CAN	JSY14	4	rnr1D57N-Rep4	GCC	C>T	A/T+1	G/C-1	CG>TA	CG>TA	AGAGAGCCAATGT	CCAATGT	CGG	GCC	C	A	C>T	C>T_GCC	CG>TA_CCAATGT	7	FALSE	FALSE
15_v.txt	32487	32487-SNV-C-T	SNV	1	C	T	52	72336	0.0718868	44.7308	rnr1D57N	FALSE	CAN	JSY14	4	rnr1D57N-Rep4	ACG	C>T	A/T+1	G/C-1	CG>TA	CG>TA	AAGATACGGAAAA	CGGAAAA	TGC	ACG	C	A	C>T	C>T_ACG	CG>TA_CGGAAAA	7	FALSE	FALSE
15_v.txt	32528	32528-SNV-G-A	SNV	1	G	A	18	72336	0.0248839	29.8844	rnr1D57N	FALSE	CAN	JSY14	4	rnr1D57N-Rep4	TGG	G>A	A/T+1	G/C-1	CG>TA	CG>TA	TTTTCTGGGGTTT	GGGGTTT	ACC	ACC	C	T	C>T	C>T_ACC	CG>TA_GGGGTTT	7	FALSE	FALSE
15_v.txt	32529	32529-SNV-G-A	SNV	1	G	A	21	72336	0.0290312	37.1429	rnr1D57N	FALSE	CAN	JSY14	4	rnr1D57N-Rep4	GGG	G>A	A/T+1	G/C-1	CG>TA	CG>TA	TTTCTGGGGTTTG	GGGTTTG	CCC	CCC	C	T	C>T	C>T_CCC	CG>TA_GGGTTTG	7	FALSE	FALSE
15_v.txt	32530	32530-SNV-G-A	SNV	1	G	A	9	72336	0.0124419	25.8881	rnr1D57N	FALSE	CAN	JSY14	4	rnr1D57N-Rep4	GGG	G>A	A/T+1	G/C-1	CG>TA	CG>TA	TTCTGGGGTTTGC	GGTTTGC	CCC	CCC	C	T	C>T	C>T_CCC	CG>TA_GGTTTGC	7	FALSE	FALSE
15_v.txt	32535	32535-SNV-G-A	SNV	1	G	A	108	72336	0.149303	36.8418	rnr1D57N	FALSE	CAN	JSY14	4	rnr1D57N-Rep4	TGC	G>A	A/T+1	G/C-1	CG>TA	CG>TA	GGGTTTGCAGCTT	GCAGCTT	ACG	ACG	C	T	C>T	C>T_ACG	CG>TA_GCAGCTT	7	FALSE	FALSE
15_v.txt	32536	32536-SNV-C-T	SNV	1	C	T	113	72336	0.156215	36.6903	rnr1D57N	FALSE	CAN	JSY14	4	rnr1D57N-Rep4	GCA	C>T	A/T+1	G/C-1	CG>TA	CG>TA	GGTTTGCAGCTTC	CAGCTTC	CGT	GCA	C	A	C>T	C>T_GCA	CG>TA_CAGCTTC	7	FALSE	FALSE
15_v.txt	32566	32566-SNV-C-T	SNV	1	C	T	88	70794	0.124304	36.625	rnr1D57N	FALSE	CAN	JSY14	4	rnr1D57N-Rep4	TCA	C>T	A/T+1	G/C-1	CG>TA	CG>TA	CTAGTTCAGTACC	CAGTACC	AGT	TCA	C	A	C>T	C>T_TCA	CG>TA_CAGTACC	7	FALSE	FALSE
15_v.txt	32575	32575-SNV-G-A	SNV	1	G	A	282	70822	0.398181	36.9504	rnr1D57N	FALSE	CAN	JSY14	4	rnr1D57N-Rep4	TGA	G>A	A/T+1	G/C-1	CG>TA	CG>TA	TACCTTGAAATGT	GAAATGT	ACT	ACT	C	T	C>T	C>T_ACT	CG>TA_GAAATGT	7	FALSE	FALSE
15_v.txt	32590	32590-SNV-C-T	SNV	1	C	T	57	70822	0.0804835	36.614	rnr1D57N	FALSE	CAN	JSY14	4	rnr1D57N-Rep4	GCG	C>T	A/T+1	G/C-1	CG>TA	CG>TA	AGGCAGCGTTAAT	CGTTAAT	CGC	GCG	C	A	C>T	C>T_GCG	CG>TA_CGTTAAT	7	FALSE	FALSE
15_v.txt	32610	32610-SNV-C-T	SNV	1	C	T	72	70822	0.101663	46.4722	rnr1D57N	FALSE	CAN	JSY14	4	rnr1D57N-Rep4	CCA	C>T	A/T+1	G/C-1	CG>TA	CG>TA	GAAACCCAACCTA	CAACCTA	GGT	CCA	C	A	C>T	C>T_CCA	CG>TA_CAACCTA	7	FALSE	FALSE
15_v.txt	32678	32678-SNV-C-T	SNV	1	C	T	23	70821	0.0324762	43.6509	rnr1D57N	FALSE	CAN	JSY14	4	rnr1D57N-Rep4	TCC	C>T	A/T+1	G/C-1	CG>TA	CG>TA	GTTTCTCCAATAA	CCAATAA	AGG	TCC	C	A	C>T	C>T_TCC	CG>TA_CCAATAA	7	FALSE	FALSE
15_v.txt	32679	32679-SNV-C-T	SNV	1	C	T	137	70821	0.193445	59.7252	rnr1D57N	FALSE	CAN	JSY14	4	rnr1D57N-Rep4	CCA	C>T	A/T+1	G/C-1	CG>TA	CG>TA	TTTCTCCAATAAC	CAATAAC	GGT	CCA	C	A	C>T	C>T_CCA	CG>TA_CAATAAC	7	FALSE	FALSE
15_v.txt	32700	32700-SNV-C-T	SNV	1	C	T	62	70822	0.0875434	57.4355	rnr1D57N	FALSE	CAN	JSY14	4	rnr1D57N-Rep4	GCC	C>T	A/T+1	G/C-1	CG>TA	CG>TA	ACTGGGCCGGTAA	CCGGTAA	CGG	GCC	C	A	C>T	C>T_GCC	CG>TA_CCGGTAA	7	FALSE	FALSE
15_v.txt	32776	32776-SNV-C-T	SNV	1	C	T	58	70822	0.0818955	49.7414	rnr1D57N	FALSE	CAN	JSY14	4	rnr1D57N-Rep4	GCG	C>T	A/T+1	G/C-1	CG>TA	CG>TA	TGGAAGCGACCCA	CGACCCA	CGC	GCG	C	A	C>T	C>T_GCG	CG>TA_CGACCCA	7	FALSE	FALSE
15_v.txt	32798	32798-SNV-G-A	SNV	1	G	A	83	70822	0.117195	43.1327	rnr1D57N	FALSE	CAN	JSY14	4	rnr1D57N-Rep4	CGT	G>A	A/T+1	G/C-1	CG>TA	CG>TA	TTCACCGTAATAT	GTAATAT	GCA	GCA	C	T	C>T	C>T_GCA	CG>TA_GTAATAT	7	FALSE	FALSE
15_v.txt	32860	32860-SNV-C-T	SNV	1	C	T	63	70816	0.0889629	34.5714	rnr1D57N	FALSE	CAN	JSY14	4	rnr1D57N-Rep4	GCC	C>T	A/T+1	G/C-1	CG>TA	CG>TA	TCCATGCCGCCAG	CCGCCAG	CGG	GCC	C	A	C>T	C>T_GCC	CG>TA_CCGCCAG	7	FALSE	FALSE
15_v.txt	32862	32862-SNV-G-A	SNV	1	G	A	57	70816	0.0804903	34.2982	rnr1D57N	FALSE	CAN	JSY14	4	rnr1D57N-Rep4	CGC	G>A	A/T+1	G/C-1	CG>TA	CG>TA	CATGCCGCCAGTG	GCCAGTG	GCG	GCG	C	T	C>T	C>T_GCG	CG>TA_GCCAGTG	7	FALSE	FALSE
15_v.txt	32879	32879-SNV-C-T	SNV	1	C	T	43	75144	0.0572235	35.1123	rnr1D57N	FALSE	CAN	JSY14	4	rnr1D57N-Rep4	ACG	C>T	A/T+1	G/C-1	CG>TA	CG>TA	TTTGTACGTCCAA	CGTCCAA	TGC	ACG	C	A	C>T	C>T_ACG	CG>TA_CGTCCAA	7	FALSE	FALSE
15_v.txt	32880	32880-SNV-G-A	SNV	1	G	A	45	75143	0.0598858	35.9531	rnr1D57N	FALSE	CAN	JSY14	4	rnr1D57N-Rep4	CGT	G>A	A/T+1	G/C-1	CG>TA	CG>TA	TTGTACGTCCAAA	GTCCAAA	GCA	GCA	C	T	C>T	C>T_GCA	CG>TA_GTCCAAA	7	FALSE	FALSE
15_v.txt	32899	32899-SNV-G-A	SNV	1	G	A	132	75142	0.175667	34.776	rnr1D57N	FALSE	CAN	JSY14	4	rnr1D57N-Rep4	TGG	G>A	A/T+1	G/C-1	CG>TA	CG>TA	TGACTTGGCCAAC	GGCCAAC	ACC	ACC	C	T	C>T	C>T_ACC	CG>TA_GGCCAAC	7	FALSE	FALSE
15_v.txt	32900	32900-SNV-G-A	SNV	1	G	A	56	75142	0.0745256	34.4539	rnr1D57N	FALSE	CAN	JSY14	4	rnr1D57N-Rep4	GGC	G>A	A/T+1	G/C-1	CG>TA	CG>TA	GACTTGGCCAACT	GCCAACT	CCG	CCG	C	T	C>T	C>T_CCG	CG>TA_GCCAACT	7	FALSE	FALSE
15_v.txt	32901	32901-SNV-C-T	SNV	1	C	T	161	75142	0.214261	32.8758	rnr1D57N	FALSE	CAN	JSY14	4	rnr1D57N-Rep4	GCC	C>T	A/T+1	G/C-1	CG>TA	CG>TA	ACTTGGCCAACTA	CCAACTA	CGG	GCC	C	A	C>T	C>T_GCC	CG>TA_CCAACTA	7	FALSE	FALSE
15_v.txt	32922	32922-SNV-G-A	SNV	1	G	A	38	75142	0.0505709	54.1053	rnr1D57N	FALSE	CAN	JSY14	4	rnr1D57N-Rep4	GGC	G>A	A/T+1	G/C-1	CG>TA	CG>TA	TCCAGGGCAAAAG	GCAAAAG	CCG	CCG	C	T	C>T	C>T_CCG	CG>TA_GCAAAAG	7	FALSE	FALSE
15_v.txt	32928	32928-SNV-G-A	SNV	1	G	A	7	75142	0.00932	55.7112	rnr1D57N	FALSE	CAN	JSY14	4	rnr1D57N-Rep4	AGT	G>A	A/T+1	G/C-1	CG>TA	CG>TA	GCAAAAGTGATTG	GTGATTG	TCA	TCA	C	T	C>T	C>T_TCA	CG>TA_GTGATTG	7	FALSE	FALSE
15_v.txt	32935	32935-SNV-C-T	SNV	1	C	T	101	75142	0.134412	41.4653	rnr1D57N	FALSE	CAN	JSY14	4	rnr1D57N-Rep4	GCC	C>T	A/T+1	G/C-1	CG>TA	CG>TA	TGATTGCCCAAGA	CCCAAGA	CGG	GCC	C	A	C>T	C>T_GCC	CG>TA_CCCAAGA	7	FALSE	FALSE
15_v.txt	32965	32965-SNV-C-T	SNV	1	C	T	70	75142	0.093157	59.9571	rnr1D57N	FALSE	CAN	JSY14	4	rnr1D57N-Rep4	GCC	C>T	A/T+1	G/C-1	CG>TA	CG>TA	CATTGGCCGCACC	CCGCACC	CGG	GCC	C	A	C>T	C>T_GCC	CG>TA_CCGCACC	7	FALSE	FALSE
15_v.txt	32967	32967-SNV-G-A	SNV	1	G	A	177	75142	0.235554	60.2486	rnr1D57N	FALSE	CAN	JSY14	4	rnr1D57N-Rep4	CGC	G>A	A/T+1	G/C-1	CG>TA	CG>TA	TTGGCCGCACCAA	GCACCAA	GCG	GCG	C	T	C>T	C>T_GCG	CG>TA_GCACCAA	7	FALSE	FALSE
15_v.txt	32977	32977-SNV-C-T	SNV	1	C	T	60	75142	0.0798488	57.85	rnr1D57N	FALSE	CAN	JSY14	4	rnr1D57N-Rep4	GCT	C>T	A/T+1	G/C-1	CG>TA	CG>TA	CAAATGCTGGAGA	CTGGAGA	CGA	GCT	C	A	C>T	C>T_GCT	CG>TA_CTGGAGA	7	FALSE	FALSE
15_v.txt	33012	33012-SNV-G-A	SNV	1	G	A	62	75142	0.0825104	59.0968	rnr1D57N	FALSE	CAN	JSY14	4	rnr1D57N-Rep4	AGA	G>A	A/T+1	G/C-1	CG>TA	CG>TA	GTGAAAGAGGATG	GAGGATG	TCT	TCT	C	T	C>T	C>T_TCT	CG>TA_GAGGATG	7	FALSE	FALSE
15_v.txt	33056	33056-SNV-C-T	SNV	1	C	T	80	75142	0.106465	57.2	rnr1D57N	FALSE	CAN	JSY14	4	rnr1D57N-Rep4	GCG	C>T	A/T+1	G/C-1	CG>TA	CG>TA	GGACTGCGTGACA	CGTGACA	CGC	GCG	C	A	C>T	C>T_GCG	CG>TA_CGTGACA	7	FALSE	FALSE
15_v.txt	33069	33069-SNV-G-A	SNV	1	G	A	58	75142	0.0771872	46.7881	rnr1D57N	FALSE	CAN	JSY14	4	rnr1D57N-Rep4	TGC	G>A	A/T+1	G/C-1	CG>TA	CG>TA	GAATATGCCAAAG	GCCAAAG	ACG	ACG	C	T	C>T	C>T_ACG	CG>TA_GCCAAAG	7	FALSE	FALSE
15_v.txt	33070	33070-SNV-C-T	SNV	1	C	T	80	75142	0.106465	54.2372	rnr1D57N	FALSE	CAN	JSY14	4	rnr1D57N-Rep4	GCC	C>T	A/T+1	G/C-1	CG>TA	CG>TA	AATATGCCAAAGA	CCAAAGA	CGG	GCC	C	A	C>T	C>T_GCC	CG>TA_CCAAAGA	7	FALSE	FALSE
15_v.txt	33113	33113-SNV-G-A	SNV	1	G	A	51	75142	0.0678715	43.2749	rnr1D57N	FALSE	CAN	JSY14	4	rnr1D57N-Rep4	GGC	G>A	A/T+1	G/C-1	CG>TA	CG>TA	CACTGGGCCGGCG	GCCGGCG	CCG	CCG	C	T	C>T	C>T_CCG	CG>TA_GCCGGCG	7	FALSE	FALSE
15_v.txt	33114	33114-SNV-C-T	SNV	1	C	T	127	75142	0.169013	43.8823	rnr1D57N	FALSE	CAN	JSY14	4	rnr1D57N-Rep4	GCC	C>T	A/T+1	G/C-1	CG>TA	CG>TA	ACTGGGCCGGCGT	CCGGCGT	CGG	GCC	C	A	C>T	C>T_GCC	CG>TA_CCGGCGT	7	FALSE	FALSE
15_v.txt	33115	33115-SNV-C-T	SNV	1	C	T	72	75142	0.0958186	42.5126	rnr1D57N	FALSE	CAN	JSY14	4	rnr1D57N-Rep4	CCG	C>T	A/T+1	G/C-1	CG>TA	CG>TA	CTGGGCCGGCGTT	CGGCGTT	GGC	CCG	C	A	C>T	C>T_CCG	CG>TA_CGGCGTT	7	FALSE	FALSE
15_v.txt	33118	33118-SNV-C-T	SNV	1	C	T	54	75142	0.0718639	41.2389	rnr1D57N	FALSE	CAN	JSY14	4	rnr1D57N-Rep4	GCG	C>T	A/T+1	G/C-1	CG>TA	CG>TA	GGCCGGCGTTGGT	CGTTGGT	CGC	GCG	C	A	C>T	C>T_GCG	CG>TA_CGTTGGT	7	FALSE	FALSE
15_v.txt	33119	33119-SNV-G-A	SNV	1	G	A	62	75141	0.0825115	46.2576	rnr1D57N	FALSE	CAN	JSY14	4	rnr1D57N-Rep4	CGT	G>A	A/T+1	G/C-1	CG>TA	CG>TA	GCCGGCGTTGGTC	GTTGGTC	GCA	GCA	C	T	C>T	C>T_GCA	CG>TA_GTTGGTC	7	FALSE	FALSE
15_v.txt	33168	33168-SNV-C-T	SNV	1	C	T	493	75126	0.656231	37.2677	rnr1D57N	FALSE	CAN	JSY14	4	rnr1D57N-Rep4	ACC	C>T	A/T+1	G/C-1	CG>TA	CG>TA	ATAGTACCACCAA	CCACCAA	TGG	ACC	C	A	C>T	C>T_ACC	CG>TA_CCACCAA	7	FALSE	FALSE
15_v.txt	33199	33199-SNV-G-A	SNV	1	G	A	35	61063	0.0573179	36.0857	rnr1D57N	FALSE	CAN	JSY14	4	rnr1D57N-Rep4	TGC	G>A	A/T+1	G/C-1	CG>TA	CG>TA	GTCTTTGCTTAAG	GCTTAAG	ACG	ACG	C	T	C>T	C>T_ACG	CG>TA_GCTTAAG	7	FALSE	FALSE
15_v.txt	33205	33205-SNV-G-A	SNV	1	G	A	19	61063	0.0311154	40.9468	rnr1D57N	FALSE	CAN	JSY14	4	rnr1D57N-Rep4	AGC	G>A	A/T+1	G/C-1	CG>TA	CG>TA	GCTTAAGCTCTCT	GCTCTCT	TCG	TCG	C	T	C>T	C>T_TCG	CG>TA_GCTCTCT	7	FALSE	FALSE
15_v.txt	33258	33258-SNV-C-T	SNV	1	C	T	87	61063	0.142476	42.1034	rnr1D57N	FALSE	CAN	JSY14	4	rnr1D57N-Rep4	GCC	C>T	A/T+1	G/C-1	CG>TA	CG>TA	CCTATGCCATCCT	CCATCCT	CGG	GCC	C	A	C>T	C>T_GCC	CG>TA_CCATCCT	7	FALSE	FALSE
15_v.txt	33276	33276-SNV-G-A	SNV	1	G	A	66	61063	0.108085	46.4697	rnr1D57N	FALSE	CAN	JSY14	4	rnr1D57N-Rep4	CGT	G>A	A/T+1	G/C-1	CG>TA	CG>TA	GAGAACGTATCCT	GTATCCT	GCA	GCA	C	T	C>T	C>T_GCA	CG>TA_GTATCCT	7	FALSE	FALSE
15_v.txt	33284	33284-SNV-G-A	SNV	1	G	A	53	61063	0.0867956	44.7547	rnr1D57N	FALSE	CAN	JSY14	4	rnr1D57N-Rep4	CGC	G>A	A/T+1	G/C-1	CG>TA	CG>TA	ATCCTCGCCATTT	GCCATTT	GCG	GCG	C	T	C>T	C>T_GCG	CG>TA_GCCATTT	7	FALSE	FALSE
15_v.txt	33309	33309-SNV-C-T	SNV	1	C	T	71	61059	0.116281	55.9115	rnr1D57N	FALSE	CAN	JSY14	4	rnr1D57N-Rep4	GCG	C>T	A/T+1	G/C-1	CG>TA	CG>TA	AAAGAGCGCAATG	CGCAATG	CGC	GCG	C	A	C>T	C>T_GCG	CG>TA_CGCAATG	7	FALSE	FALSE
15_v.txt	33310	33310-SNV-G-A	SNV	1	G	A	69	61058	0.113007	54.0329	rnr1D57N	FALSE	CAN	JSY14	4	rnr1D57N-Rep4	CGC	G>A	A/T+1	G/C-1	CG>TA	CG>TA	AAGAGCGCAATGG	GCAATGG	GCG	GCG	C	T	C>T	C>T_GCG	CG>TA_GCAATGG	7	FALSE	FALSE
15_v.txt	33368	33368-SNV-G-A	SNV	1	G	A	6	61059	0.00983	50.6656	rnr1D57N	FALSE	CAN	JSY14	4	rnr1D57N-Rep4	GGT	G>A	A/T+1	G/C-1	CG>TA	CG>TA	TCTGTGGTGTGTT	GTGTGTT	CCA	CCA	C	T	C>T	C>T_CCA	CG>TA_GTGTGTT	7	FALSE	FALSE
15_v.txt	33392	33392-SNV-G-A	SNV	1	G	A	42	61063	0.0687814	48.6429	rnr1D57N	FALSE	CAN	JSY14	4	rnr1D57N-Rep4	CGT	G>A	A/T+1	G/C-1	CG>TA	CG>TA	AACGTCGTGAAAG	GTGAAAG	GCA	GCA	C	T	C>T	C>T_GCA	CG>TA_GTGAAAG	7	FALSE	FALSE
15_v.txt	33412	33412-SNV-G-A	SNV	1	G	A	90	61063	0.147389	46.1778	rnr1D57N	FALSE	CAN	JSY14	4	rnr1D57N-Rep4	GGC	G>A	A/T+1	G/C-1	CG>TA	CG>TA	TGACCGGCTCATT	GCTCATT	CCG	CCG	C	T	C>T	C>T_CCG	CG>TA_GCTCATT	7	FALSE	FALSE
15_v.txt	33474	33474-SNV-C-T	SNV	1	C	T	89	61063	0.145751	33.2697	rnr1D57N	FALSE	CAN	JSY14	4	rnr1D57N-Rep4	GCC	C>T	A/T+1	G/C-1	CG>TA	CG>TA	GCTATGCCTTTTT	CCTTTTT	CGG	GCC	C	A	C>T	C>T_GCC	CG>TA_CCTTTTT	7	FALSE	FALSE
15_v.txt	31981	31981-SNV-G-C	SNV	1	G	C	5	64727	0.00773	35.4	rnr1D57N	FALSE	CAN	JSY14	4	rnr1D57N-Rep4	GGC	G>C	G/C+1	G/C-1	CG>GC	CG>GC	AGCCGGGCATTAA	GCATTAA	CCG	CCG	C	G	C>G	C>G_CCG	CG>GC_GCATTAA	7	FALSE	FALSE
15_v.txt	32064	32064-SNV-G-C	SNV	1	G	C	356	64727	0.550002	61.882	rnr1D57N	FALSE	CAN	JSY14	4	rnr1D57N-Rep4	TGA	G>C	G/C+1	G/C-1	CG>GC	CG>GC	GAGATTGAGATAA	GAGATAA	ACT	ACT	C	G	C>G	C>G_ACT	CG>GC_GAGATAA	7	FALSE	FALSE
15_v.txt	32119	32119-SNV-C-G	SNV	1	C	G	5	64665	0.00773	64	rnr1D57N	FALSE	CAN	JSY14	4	rnr1D57N-Rep4	TCG	C>G	G/C+1	G/C-1	CG>GC	CG>GC	GCCATTCGAAAAC	CGAAAAC	AGC	TCG	C	C	C>G	C>G_TCG	CG>GC_CGAAAAC	7	FALSE	FALSE
15_v.txt	32157	32157-SNV-G-C	SNV	1	G	C	2	64664	0.00309	37.5004	rnr1D57N	FALSE	CAN	JSY14	4	rnr1D57N-Rep4	AGC	G>C	G/C+1	G/C-1	CG>GC	CG>GC	ATGTAAGCCAAAG	GCCAAAG	TCG	TCG	C	G	C>G	C>G_TCG	CG>GC_GCCAAAG	7	FALSE	FALSE
15_v.txt	32163	32163-SNV-G-C	SNV	1	G	C	2	64664	0.00309	42.9995	rnr1D57N	FALSE	CAN	JSY14	4	rnr1D57N-Rep4	AGC	G>C	G/C+1	G/C-1	CG>GC	CG>GC	GCCAAAGCGCCAA	GCGCCAA	TCG	TCG	C	G	C>G	C>G_TCG	CG>GC_GCGCCAA	7	FALSE	FALSE
15_v.txt	32199	32199-SNV-G-C	SNV	1	G	C	133	64665	0.205675	43.2707	rnr1D57N	FALSE	CAN	JSY14	4	rnr1D57N-Rep4	TGG	G>C	G/C+1	G/C-1	CG>GC	CG>GC	ATGTATGGAACAC	GGAACAC	ACC	ACC	C	G	C>G	C>G_ACC	CG>GC_GGAACAC	7	FALSE	FALSE
15_v.txt	32529	32529-SNV-G-C	SNV	1	G	C	44	72336	0.0608273	42.6591	rnr1D57N	FALSE	CAN	JSY14	4	rnr1D57N-Rep4	GGG	G>C	G/C+1	G/C-1	CG>GC	CG>GC	TTTCTGGGGTTTG	GGGTTTG	CCC	CCC	C	G	C>G	C>G_CCC	CG>GC_GGGTTTG	7	FALSE	FALSE
15_v.txt	32536	32536-SNV-C-G	SNV	1	C	G	3	72336	0.00415	37	rnr1D57N	FALSE	CAN	JSY14	4	rnr1D57N-Rep4	GCA	C>G	G/C+1	G/C-1	CG>GC	CG>GC	GGTTTGCAGCTTC	CAGCTTC	CGT	GCA	C	C	C>G	C>G_GCA	CG>GC_CAGCTTC	7	FALSE	FALSE
15_v.txt	32566	32566-SNV-C-G	SNV	1	C	G	6	70794	0.00848	36.1667	rnr1D57N	FALSE	CAN	JSY14	4	rnr1D57N-Rep4	TCA	C>G	G/C+1	G/C-1	CG>GC	CG>GC	CTAGTTCAGTACC	CAGTACC	AGT	TCA	C	C	C>G	C>G_TCA	CG>GC_CAGTACC	7	FALSE	FALSE
15_v.txt	32819	32819-SNV-G-C	SNV	1	G	C	451	70822	0.636808	45.1929	rnr1D57N	FALSE	CAN	JSY14	4	rnr1D57N-Rep4	AGT	G>C	G/C+1	G/C-1	CG>GC	CG>GC	GAACAAGTTCATT	GTTCATT	TCA	TCA	C	G	C>G	C>G_TCA	CG>GC_GTTCATT	7	FALSE	FALSE
15_v.txt	32901	32901-SNV-C-G	SNV	1	C	G	5	75142	0.00665	43.2	rnr1D57N	FALSE	CAN	JSY14	4	rnr1D57N-Rep4	GCC	C>G	G/C+1	G/C-1	CG>GC	CG>GC	ACTTGGCCAACTA	CCAACTA	CGG	GCC	C	C	C>G	C>G_GCC	CG>GC_CCAACTA	7	FALSE	FALSE
15_v.txt	32937	32937-SNV-C-G	SNV	1	C	G	30	75142	0.0399244	52	rnr1D57N	FALSE	CAN	JSY14	4	rnr1D57N-Rep4	CCA	C>G	G/C+1	G/C-1	CG>GC	CG>GC	ATTGCCCAAGAAA	CAAGAAA	GGT	CCA	C	C	C>G	C>G_CCA	CG>GC_CAAGAAA	7	FALSE	FALSE
15_v.txt	32997	32997-SNV-G-C	SNV	1	G	C	38	75142	0.0505709	60.2895	rnr1D57N	FALSE	CAN	JSY14	4	rnr1D57N-Rep4	TGA	G>C	G/C+1	G/C-1	CG>GC	CG>GC	CTTTGTGAGAAAA	GAGAAAA	ACT	ACT	C	G	C>G	C>G_ACT	CG>GC_GAGAAAA	7	FALSE	FALSE
15_v.txt	33113	33113-SNV-G-C	SNV	1	G	C	2	75142	0.00266	46.5003	rnr1D57N	FALSE	CAN	JSY14	4	rnr1D57N-Rep4	GGC	G>C	G/C+1	G/C-1	CG>GC	CG>GC	CACTGGGCCGGCG	GCCGGCG	CCG	CCG	C	G	C>G	C>G_CCG	CG>GC_GCCGGCG	7	FALSE	FALSE
15_v.txt	33114	33114-SNV-C-G	SNV	1	C	G	6	75142	0.00799	38.5004	rnr1D57N	FALSE	CAN	JSY14	4	rnr1D57N-Rep4	GCC	C>G	G/C+1	G/C-1	CG>GC	CG>GC	ACTGGGCCGGCGT	CCGGCGT	CGG	GCC	C	C	C>G	C>G_GCC	CG>GC_CCGGCGT	7	FALSE	FALSE
15_v.txt	33115	33115-SNV-C-G	SNV	1	C	G	14	75142	0.0186314	44.8558	rnr1D57N	FALSE	CAN	JSY14	4	rnr1D57N-Rep4	CCG	C>G	G/C+1	G/C-1	CG>GC	CG>GC	CTGGGCCGGCGTT	CGGCGTT	GGC	CCG	C	C	C>G	C>G_CCG	CG>GC_CGGCGTT	7	FALSE	FALSE
15_v.txt	33172	33172-SNV-C-G	SNV	1	C	G	332	75126	0.441924	37.5482	rnr1D57N	FALSE	CAN	JSY14	4	rnr1D57N-Rep4	CCA	C>G	G/C+1	G/C-1	CG>GC	CG>GC	TACCACCAAGGGC	CAAGGGC	GGT	CCA	C	C	C>G	C>G_CCA	CG>GC_CAAGGGC	7	FALSE	FALSE
15_v.txt	33193	33193-SNV-G-C	SNV	1	G	C	74	61063	0.121186	37.2973	rnr1D57N	FALSE	CAN	JSY14	4	rnr1D57N-Rep4	TGT	G>C	G/C+1	G/C-1	CG>GC	CG>GC	CAATATGTCTTTG	GTCTTTG	ACA	ACA	C	G	C>G	C>G_ACA	CG>GC_GTCTTTG	7	FALSE	FALSE
15_v.txt	33205	33205-SNV-G-C	SNV	1	G	C	19	61063	0.0311154	37.42	rnr1D57N	FALSE	CAN	JSY14	4	rnr1D57N-Rep4	AGC	G>C	G/C+1	G/C-1	CG>GC	CG>GC	GCTTAAGCTCTCT	GCTCTCT	TCG	TCG	C	G	C>G	C>G_TCG	CG>GC_GCTCTCT	7	FALSE	FALSE
15_v.txt	33310	33310-SNV-G-C	SNV	1	G	C	6	61058	0.00983	32.1642	rnr1D57N	FALSE	CAN	JSY14	4	rnr1D57N-Rep4	CGC	G>C	G/C+1	G/C-1	CG>GC	CG>GC	AAGAGCGCAATGG	GCAATGG	GCG	GCG	C	G	C>G	C>G_GCG	CG>GC_GCAATGG	7	FALSE	FALSE
15_v.txt	33354	33354-SNV-G-C	SNV	1	G	C	15	61063	0.0245648	46.4667	rnr1D57N	FALSE	CAN	JSY14	4	rnr1D57N-Rep4	TGA	G>C	G/C+1	G/C-1	CG>GC	CG>GC	GGTATTGACCCAC	GACCCAC	ACT	ACT	C	G	C>G	C>G_ACT	CG>GC_GACCCAC	7	FALSE	FALSE
15_v.txt	33356	33356-SNV-C-G	SNV	1	C	G	2	61063	0.00328	55.9896	rnr1D57N	FALSE	CAN	JSY14	4	rnr1D57N-Rep4	ACC	C>G	G/C+1	G/C-1	CG>GC	CG>GC	TATTGACCCACGT	CCCACGT	TGG	ACC	C	C	C>G	C>G_ACC	CG>GC_CCCACGT	7	FALSE	FALSE
15_v.txt	31657	31657-SNV-G-T	SNV	1	G	T	169	25145	0.672102	18.7194	rnr1D57N	FALSE	CAN	JSY14	4	rnr1D57N-Rep4	GGC	G>T	A/T+1	G/C-1	CG>AT	CG>AT	GAAATGGCGTGGA	GCGTGGA	CCG	CCG	C	A	C>A	C>A_CCG	CG>AT_GCGTGGA	7	FALSE	FALSE
15_v.txt	31979	31979-SNV-G-T	SNV	1	G	T	2	64727	0.00309	30.4998	rnr1D57N	FALSE	CAN	JSY14	4	rnr1D57N-Rep4	CGG	G>T	A/T+1	G/C-1	CG>AT	CG>AT	CAAGCCGGGCATT	GGGCATT	GCC	GCC	C	A	C>A	C>A_GCC	CG>AT_GGGCATT	7	FALSE	FALSE
15_v.txt	31981	31981-SNV-G-T	SNV	1	G	T	26	64727	0.0401687	24.7308	rnr1D57N	FALSE	CAN	JSY14	4	rnr1D57N-Rep4	GGC	G>T	A/T+1	G/C-1	CG>AT	CG>AT	AGCCGGGCATTAA	GCATTAA	CCG	CCG	C	A	C>A	C>A_CCG	CG>AT_GCATTAA	7	FALSE	FALSE
15_v.txt	32008	32008-SNV-C-A	SNV	1	C	A	4488	64727	6.93374	56.8106	rnr1D57N	FALSE	CAN	JSY14	4	rnr1D57N-Rep4	TCG	C>A	A/T+1	G/C-1	CG>AT	CG>AT	GTAACTCGTCACG	CGTCACG	AGC	TCG	C	T	C>A	C>A_TCG	CG>AT_CGTCACG	7	FALSE	FALSE
15_v.txt	32056	32056-SNV-G-T	SNV	1	G	T	17	64727	0.0262642	22.1746	rnr1D57N	FALSE	CAN	JSY14	4	rnr1D57N-Rep4	TGC	G>T	A/T+1	G/C-1	CG>AT	CG>AT	TGATGTGCGAGAT	GCGAGAT	ACG	ACG	C	A	C>A	C>A_ACG	CG>AT_GCGAGAT	7	FALSE	FALSE
15_v.txt	32064	32064-SNV-G-T	SNV	1	G	T	113	64727	0.174579	59.7876	rnr1D57N	FALSE	CAN	JSY14	4	rnr1D57N-Rep4	TGA	G>T	A/T+1	G/C-1	CG>AT	CG>AT	GAGATTGAGATAA	GAGATAA	ACT	ACT	C	A	C>A	C>A_ACT	CG>AT_GAGATAA	7	FALSE	FALSE
15_v.txt	32088	32088-SNV-C-A	SNV	1	C	A	55	64727	0.0849723	55.8909	rnr1D57N	FALSE	CAN	JSY14	4	rnr1D57N-Rep4	GCC	C>A	A/T+1	G/C-1	CG>AT	CG>AT	AAAAAGCCTGCAA	CCTGCAA	CGG	GCC	C	T	C>A	C>A_GCC	CG>AT_CCTGCAA	7	FALSE	FALSE
15_v.txt	32119	32119-SNV-C-A	SNV	1	C	A	62	64665	0.0958788	57.1452	rnr1D57N	FALSE	CAN	JSY14	4	rnr1D57N-Rep4	TCG	C>A	A/T+1	G/C-1	CG>AT	CG>AT	GCCATTCGAAAAC	CGAAAAC	AGC	TCG	C	T	C>A	C>A_TCG	CG>AT_CGAAAAC	7	FALSE	FALSE
15_v.txt	32158	32158-SNV-C-A	SNV	1	C	A	26	64665	0.0402072	24.5381	rnr1D57N	FALSE	CAN	JSY14	4	rnr1D57N-Rep4	GCC	C>A	A/T+1	G/C-1	CG>AT	CG>AT	TGTAAGCCAAAGC	CCAAAGC	CGG	GCC	C	T	C>A	C>A_GCC	CG>AT_CCAAAGC	7	FALSE	FALSE
15_v.txt	32159	32159-SNV-C-A	SNV	1	C	A	7	64664	0.0108252	31.5709	rnr1D57N	FALSE	CAN	JSY14	4	rnr1D57N-Rep4	CCA	C>A	A/T+1	G/C-1	CG>AT	CG>AT	GTAAGCCAAAGCG	CAAAGCG	GGT	CCA	C	T	C>A	C>A_CCA	CG>AT_CAAAGCG	7	FALSE	FALSE
15_v.txt	32166	32166-SNV-C-A	SNV	1	C	A	10	64665	0.0154643	23.303	rnr1D57N	FALSE	CAN	JSY14	4	rnr1D57N-Rep4	GCC	C>A	A/T+1	G/C-1	CG>AT	CG>AT	AAAGCGCCAAATG	CCAAATG	CGG	GCC	C	T	C>A	C>A_GCC	CG>AT_CCAAATG	7	FALSE	FALSE
15_v.txt	32195	32195-SNV-G-T	SNV	1	G	T	47	64665	0.0726823	41.9149	rnr1D57N	FALSE	CAN	JSY14	4	rnr1D57N-Rep4	TGT	G>T	A/T+1	G/C-1	CG>AT	CG>AT	TGCAATGTATGGA	GTATGGA	ACA	ACA	C	A	C>A	C>A_ACA	CG>AT_GTATGGA	7	FALSE	FALSE
15_v.txt	32272	32272-SNV-G-T	SNV	1	G	T	68	72336	0.0940058	32.7778	rnr1D57N	FALSE	CAN	JSY14	4	rnr1D57N-Rep4	CGG	G>T	A/T+1	G/C-1	CG>AT	CG>AT	AAATACGGGAACC	GGGAACC	GCC	GCC	C	A	C>A	C>A_GCC	CG>AT_GGGAACC	7	FALSE	FALSE
15_v.txt	32274	32274-SNV-G-T	SNV	1	G	T	423	72336	0.584771	36.0993	rnr1D57N	FALSE	CAN	JSY14	4	rnr1D57N-Rep4	GGA	G>T	A/T+1	G/C-1	CG>AT	CG>AT	ATACGGGAACCAA	GAACCAA	CCT	CCT	C	A	C>A	C>A_CCT	CG>AT_GAACCAA	7	FALSE	FALSE
15_v.txt	32292	32292-SNV-G-T	SNV	1	G	T	37	72336	0.0511502	42.3514	rnr1D57N	FALSE	CAN	JSY14	4	rnr1D57N-Rep4	TGA	G>T	A/T+1	G/C-1	CG>AT	CG>AT	ATATTTGAATTTG	GAATTTG	ACT	ACT	C	A	C>A	C>A_ACT	CG>AT_GAATTTG	7	FALSE	FALSE
15_v.txt	32304	32304-SNV-G-T	SNV	1	G	T	206	72336	0.284782	56.2282	rnr1D57N	FALSE	CAN	JSY14	4	rnr1D57N-Rep4	AGA	G>T	A/T+1	G/C-1	CG>AT	CG>AT	GCGGCAGAAATAA	GAAATAA	TCT	TCT	C	A	C>A	C>A_TCT	CG>AT_GAAATAA	7	FALSE	FALSE
15_v.txt	32528	32528-SNV-G-T	SNV	1	G	T	48	72336	0.066357	41.9318	rnr1D57N	FALSE	CAN	JSY14	4	rnr1D57N-Rep4	TGG	G>T	A/T+1	G/C-1	CG>AT	CG>AT	TTTTCTGGGGTTT	GGGGTTT	ACC	ACC	C	A	C>A	C>A_ACC	CG>AT_GGGGTTT	7	FALSE	FALSE
15_v.txt	32529	32529-SNV-G-T	SNV	1	G	T	7	72336	0.00968	36.5714	rnr1D57N	FALSE	CAN	JSY14	4	rnr1D57N-Rep4	GGG	G>T	A/T+1	G/C-1	CG>AT	CG>AT	TTTCTGGGGTTTG	GGGTTTG	CCC	CCC	C	A	C>A	C>A_CCC	CG>AT_GGGTTTG	7	FALSE	FALSE
15_v.txt	32530	32530-SNV-G-T	SNV	1	G	T	53	72336	0.0732692	38.2059	rnr1D57N	FALSE	CAN	JSY14	4	rnr1D57N-Rep4	GGG	G>T	A/T+1	G/C-1	CG>AT	CG>AT	TTCTGGGGTTTGC	GGTTTGC	CCC	CCC	C	A	C>A	C>A_CCC	CG>AT_GGTTTGC	7	FALSE	FALSE
15_v.txt	32536	32536-SNV-C-A	SNV	1	C	A	8	72336	0.0110595	30.75	rnr1D57N	FALSE	CAN	JSY14	4	rnr1D57N-Rep4	GCA	C>A	A/T+1	G/C-1	CG>AT	CG>AT	GGTTTGCAGCTTC	CAGCTTC	CGT	GCA	C	T	C>A	C>A_GCA	CG>AT_CAGCTTC	7	FALSE	FALSE
15_v.txt	32566	32566-SNV-C-A	SNV	1	C	A	114	70794	0.161031	37.6404	rnr1D57N	FALSE	CAN	JSY14	4	rnr1D57N-Rep4	TCA	C>A	A/T+1	G/C-1	CG>AT	CG>AT	CTAGTTCAGTACC	CAGTACC	AGT	TCA	C	T	C>A	C>A_TCA	CG>AT_CAGTACC	7	FALSE	FALSE
15_v.txt	32575	32575-SNV-G-T	SNV	1	G	T	1224	70822	1.72828	36.8505	rnr1D57N	FALSE	CAN	JSY14	4	rnr1D57N-Rep4	TGA	G>T	A/T+1	G/C-1	CG>AT	CG>AT	TACCTTGAAATGT	GAAATGT	ACT	ACT	C	A	C>A	C>A_ACT	CG>AT_GAAATGT	7	FALSE	FALSE
15_v.txt	32796	32796-SNV-C-A	SNV	1	C	A	27	70822	0.0381237	44.7407	rnr1D57N	FALSE	CAN	JSY14	4	rnr1D57N-Rep4	ACC	C>A	A/T+1	G/C-1	CG>AT	CG>AT	AATTCACCGTAAT	CCGTAAT	TGG	ACC	C	T	C>A	C>A_ACC	CG>AT_CCGTAAT	7	FALSE	FALSE
15_v.txt	32798	32798-SNV-G-T	SNV	1	G	T	18	70822	0.0254158	44.7219	rnr1D57N	FALSE	CAN	JSY14	4	rnr1D57N-Rep4	CGT	G>T	A/T+1	G/C-1	CG>AT	CG>AT	TTCACCGTAATAT	GTAATAT	GCA	GCA	C	A	C>A	C>A_GCA	CG>AT_GTAATAT	7	FALSE	FALSE
15_v.txt	32876	32876-SNV-G-T	SNV	1	G	T	45	75130	0.0598962	33.4667	rnr1D57N	FALSE	CAN	JSY14	4	rnr1D57N-Rep4	TGT	G>T	A/T+1	G/C-1	CG>AT	CG>AT	AACTTTGTACGTC	GTACGTC	ACA	ACA	C	A	C>A	C>A_ACA	CG>AT_GTACGTC	7	FALSE	FALSE
15_v.txt	32879	32879-SNV-C-A	SNV	1	C	A	14	75144	0.0186309	21.9276	rnr1D57N	FALSE	CAN	JSY14	4	rnr1D57N-Rep4	ACG	C>A	A/T+1	G/C-1	CG>AT	CG>AT	TTTGTACGTCCAA	CGTCCAA	TGC	ACG	C	T	C>A	C>A_ACG	CG>AT_CGTCCAA	7	FALSE	FALSE
15_v.txt	32899	32899-SNV-G-T	SNV	1	G	T	173	75142	0.230231	14.5259	rnr1D57N	FALSE	CAN	JSY14	4	rnr1D57N-Rep4	TGG	G>T	A/T+1	G/C-1	CG>AT	CG>AT	TGACTTGGCCAAC	GGCCAAC	ACC	ACC	C	A	C>A	C>A_ACC	CG>AT_GGCCAAC	7	FALSE	FALSE
15_v.txt	32901	32901-SNV-C-A	SNV	1	C	A	7	75142	0.00932	37.2857	rnr1D57N	FALSE	CAN	JSY14	4	rnr1D57N-Rep4	GCC	C>A	A/T+1	G/C-1	CG>AT	CG>AT	ACTTGGCCAACTA	CCAACTA	CGG	GCC	C	T	C>A	C>A_GCC	CG>AT_CCAACTA	7	FALSE	FALSE
15_v.txt	32928	32928-SNV-G-T	SNV	1	G	T	11	75142	0.0146389	35.7255	rnr1D57N	FALSE	CAN	JSY14	4	rnr1D57N-Rep4	AGT	G>T	A/T+1	G/C-1	CG>AT	CG>AT	GCAAAAGTGATTG	GTGATTG	TCA	TCA	C	A	C>A	C>A_TCA	CG>AT_GTGATTG	7	FALSE	FALSE
15_v.txt	33006	33006-SNV-G-T	SNV	1	G	T	22	75142	0.0292779	60.2273	rnr1D57N	FALSE	CAN	JSY14	4	rnr1D57N-Rep4	TGT	G>T	A/T+1	G/C-1	CG>AT	CG>AT	AAAACTGTGAAAG	GTGAAAG	ACA	ACA	C	A	C>A	C>A_ACA	CG>AT_GTGAAAG	7	FALSE	FALSE
15_v.txt	33050	33050-SNV-G-T	SNV	1	G	T	21	75142	0.0279471	48.2857	rnr1D57N	FALSE	CAN	JSY14	4	rnr1D57N-Rep4	AGG	G>T	A/T+1	G/C-1	CG>AT	CG>AT	ACCCAAGGACTGC	GGACTGC	TCC	TCC	C	A	C>A	C>A_TCC	CG>AT_GGACTGC	7	FALSE	FALSE
15_v.txt	33070	33070-SNV-C-A	SNV	1	C	A	10	75142	0.0133081	36.6	rnr1D57N	FALSE	CAN	JSY14	4	rnr1D57N-Rep4	GCC	C>A	A/T+1	G/C-1	CG>AT	CG>AT	AATATGCCAAAGA	CCAAAGA	CGG	GCC	C	T	C>A	C>A_GCC	CG>AT_CCAAAGA	7	FALSE	FALSE
15_v.txt	33093	33093-SNV-G-T	SNV	1	G	T	129	75142	0.171675	49.9612	rnr1D57N	FALSE	CAN	JSY14	4	rnr1D57N-Rep4	TGA	G>T	A/T+1	G/C-1	CG>AT	CG>AT	AAATATGATATAA	GATATAA	ACT	ACT	C	A	C>A	C>A_ACT	CG>AT_GATATAA	7	FALSE	FALSE
15_v.txt	33114	33114-SNV-C-A	SNV	1	C	A	64	75142	0.0851721	42.6253	rnr1D57N	FALSE	CAN	JSY14	4	rnr1D57N-Rep4	GCC	C>A	A/T+1	G/C-1	CG>AT	CG>AT	ACTGGGCCGGCGT	CCGGCGT	CGG	GCC	C	T	C>A	C>A_GCC	CG>AT_CCGGCGT	7	FALSE	FALSE
15_v.txt	33151	33151-SNV-G-T	SNV	1	G	T	58	75141	0.0771882	38.1552	rnr1D57N	FALSE	CAN	JSY14	4	rnr1D57N-Rep4	AGA	G>T	A/T+1	G/C-1	CG>AT	CG>AT	TGAAAAGACCTGT	GACCTGT	TCT	TCT	C	A	C>A	C>A_TCT	CG>AT_GACCTGT	7	FALSE	FALSE
15_v.txt	33182	33182-SNV-C-A	SNV	1	C	A	25	74051	0.0337605	37.68	rnr1D57N	FALSE	CAN	JSY14	4	rnr1D57N-Rep4	TCA	C>A	A/T+1	G/C-1	CG>AT	CG>AT	GGCAATCATACCA	CATACCA	AGT	TCA	C	T	C>A	C>A_TCA	CG>AT_CATACCA	7	FALSE	FALSE
15_v.txt	33220	33220-SNV-C-A	SNV	1	C	A	39	61063	0.0638685	35.8205	rnr1D57N	FALSE	CAN	JSY14	4	rnr1D57N-Rep4	TCA	C>A	A/T+1	G/C-1	CG>AT	CG>AT	TCACTTCAGCGTT	CAGCGTT	AGT	TCA	C	T	C>A	C>A_TCA	CG>AT_CAGCGTT	7	FALSE	FALSE
15_v.txt	33325	33325-SNV-C-A	SNV	1	C	A	69	61062	0.113	54.4927	rnr1D57N	FALSE	CAN	JSY14	4	rnr1D57N-Rep4	TCT	C>A	A/T+1	G/C-1	CG>AT	CG>AT	ACAATTCTTTACT	CTTTACT	AGA	TCT	C	T	C>A	C>A_TCT	CG>AT_CTTTACT	7	FALSE	FALSE
15_v.txt	33356	33356-SNV-C-A	SNV	1	C	A	8	61063	0.0131012	35.3755	rnr1D57N	FALSE	CAN	JSY14	4	rnr1D57N-Rep4	ACC	C>A	A/T+1	G/C-1	CG>AT	CG>AT	TATTGACCCACGT	CCCACGT	TGG	ACC	C	T	C>A	C>A_ACC	CG>AT_CCCACGT	7	FALSE	FALSE
15_v.txt	33368	33368-SNV-G-T	SNV	1	G	T	37	61059	0.0605971	12.4595	rnr1D57N	FALSE	CAN	JSY14	4	rnr1D57N-Rep4	GGT	G>T	A/T+1	G/C-1	CG>AT	CG>AT	TCTGTGGTGTGTT	GTGTGTT	CCA	CCA	C	A	C>A	C>A_CCA	CG>AT_GTGTGTT	7	FALSE	FALSE
15_v.txt	33474	33474-SNV-C-A	SNV	1	C	A	123	61063	0.201431	32.9187	rnr1D57N	FALSE	CAN	JSY14	4	rnr1D57N-Rep4	GCC	C>A	A/T+1	G/C-1	CG>AT	CG>AT	GCTATGCCTTTTT	CCTTTTT	CGG	GCC	C	T	C>A	C>A_GCC	CG>AT_CCTTTTT	7	FALSE	FALSE
15_v.txt	33475	33475-SNV-C-A	SNV	1	C	A	35	61063	0.0573179	34.7714	rnr1D57N	FALSE	CAN	JSY14	4	rnr1D57N-Rep4	CCT	C>A	A/T+1	G/C-1	CG>AT	CG>AT	CTATGCCTTTTTT	CTTTTTT	GGA	CCT	C	T	C>A	C>A_CCT	CG>AT_CTTTTTT	7	FALSE	FALSE
15_v.txt	31979	31979-MNV-GGG-TTT	MNV	3	GGG	TTT	1	64727	0.00155	34	rnr1D57N	FALSE	CAN	JSY14	4	rnr1D57N-Rep4	CGG	nope	>1bp-ins	>1bpdel	none	MNV	CAAGCCGGGCATT	GGGCATT	GCC	CGG	GGG	none	NA	NA_CGG	MNV_GGGCATT	7	FALSE	FALSE
15_v.txt	32677	32677-MNV-TCCA-AGGT	MNV	4	TCCA	AGGT	26	70822	0.0367118	59.9923	rnr1D57N	FALSE	CAN	JSY14	4	rnr1D57N-Rep4	CTC	nope	>1bp-ins	>1bpdel	none	MNV	GGTTTCTCCAATA	TCCAATA	GAG	CTC	TCCA	none	NA	NA_CTC	MNV_TCCAATA	7	FALSE	FALSE
15_v.txt	33368	33368-MNV-GT-TG	MNV	2	GT	TG	2	61063	0.00328	19.5	rnr1D57N	FALSE	CAN	JSY14	4	rnr1D57N-Rep4	GGT	nope	>1bp-ins	>1bpdel	none	MNV	TCTGTGGTGTGTT	GTGTGTT	CCA	GGT	GT	none	NA	NA_GGT	MNV_GTGTGTT	7	FALSE	FALSE
15_v.txt	31723	31723-Insertion---A	Insertion	1	-	A	3	25145	0.0119308	64	rnr1D57N	FALSE	CAN	JSY14	4	rnr1D57N-Rep4	CAA	nope	A/T+1	>1bpdel	none	A/T+1	TGTCCCAAAAAGT	AAAAAGT	GTT	CAA	-	T	NA	NA_CAA	A/T+1_AAAAAGT	7	FALSE	FALSE
15_v.txt	31819	31819-Insertion---ATCTGAATATGCATTGAAATAAG	Insertion	23	-	ATCTGAATATGCATTGAAATAAG	11	25145	0.0437463	55.0435	rnr1D57N	FALSE	CAN	JSY14	4	rnr1D57N-Rep4	CAT	nope	>1bp-ins	>1bpdel	none	>1bp-ins	ATCTGCATCTGAA	ATCTGAA	GTA	CAT	-	none	NA	NA_CAT	>1bp-ins_ATCTGAA	7	FALSE	FALSE
15_v.txt	32081	32081-Insertion---A	Insertion	1	-	A	171	64727	0.264187	63.0468	rnr1D57N	FALSE	CAN	JSY14	4	rnr1D57N-Rep4	CAA	nope	A/T+1	>1bpdel	none	A/T+1	CCATGCAAAAAAG	AAAAAAG	GTT	CAA	-	T	NA	NA_CAA	A/T+1_AAAAAAG	7	FALSE	FALSE
15_v.txt	32265	32265-Insertion---A	Insertion	1	-	A	17	72337	0.0235011	37.4706	rnr1D57N	FALSE	CAN	JSY14	4	rnr1D57N-Rep4	TAA	nope	A/T+1	>1bpdel	none	A/T+1	CCAAATAAAATAC	AAAATAC	ATT	TAA	-	T	NA	NA_TAA	A/T+1_AAAATAC	7	FALSE	FALSE
15_v.txt	32346	32346-Insertion---A	Insertion	1	-	A	42	72336	0.0580624	63.4286	rnr1D57N	FALSE	CAN	JSY14	4	rnr1D57N-Rep4	CAA	nope	A/T+1	>1bpdel	none	A/T+1	TGTGGCAAAACCT	AAAACCT	GTT	CAA	-	T	NA	NA_CAA	A/T+1_AAAACCT	7	FALSE	FALSE
15_v.txt	32457	32457-Insertion---A	Insertion	1	-	A	1	72336	0.00138	37	rnr1D57N	FALSE	CAN	JSY14	4	rnr1D57N-Rep4	TAA	nope	A/T+1	>1bpdel	none	A/T+1	ATGAATAATAGAG	AATAGAG	ATT	TAA	-	T	NA	NA_TAA	A/T+1_AATAGAG	7	FALSE	FALSE
15_v.txt	32490	32490-Insertion---A	Insertion	1	-	A	14	72336	0.0193541	49.1429	rnr1D57N	FALSE	CAN	JSY14	4	rnr1D57N-Rep4	GAA	nope	A/T+1	>1bpdel	none	A/T+1	ATACGGAAAACAA	AAAACAA	CTT	GAA	-	T	NA	NA_GAA	A/T+1_AAAACAA	7	FALSE	FALSE
15_v.txt	32498	32498-Insertion---T	Insertion	1	-	T	3	72336	0.00415	55	rnr1D57N	FALSE	CAN	JSY14	4	rnr1D57N-Rep4	CTT	nope	A/T+1	>1bpdel	none	A/T+1	AACAACTTTTTTG	TTTTTTG	GAA	CTT	-	A	NA	NA_CTT	A/T+1_TTTTTTG	7	FALSE	FALSE
15_v.txt	32522	32522-Insertion---T	Insertion	1	-	T	2	72336	0.00277	38	rnr1D57N	FALSE	CAN	JSY14	4	rnr1D57N-Rep4	ATT	nope	A/T+1	>1bpdel	none	A/T+1	AACGGATTTTCTG	TTTTCTG	TAA	ATT	-	A	NA	NA_ATT	A/T+1_TTTTCTG	7	FALSE	FALSE
15_v.txt	32680	32680-Insertion---A	Insertion	1	-	A	62	70822	0.0875434	63.2742	rnr1D57N	FALSE	CAN	JSY14	4	rnr1D57N-Rep4	CAA	nope	A/T+1	>1bpdel	none	A/T+1	TTCTCCAATAACG	AATAACG	GTT	CAA	-	T	NA	NA_CAA	A/T+1_AATAACG	7	FALSE	FALSE
15_v.txt	32728	32728-Insertion---A	Insertion	1	-	A	15	70822	0.0211799	60.5333	rnr1D57N	FALSE	CAN	JSY14	4	rnr1D57N-Rep4	CAA	nope	A/T+1	>1bpdel	none	A/T+1	CCATACAAAAACA	AAAAACA	GTT	CAA	-	T	NA	NA_CAA	A/T+1_AAAAACA	7	FALSE	FALSE
15_v.txt	32836	32836-Insertion---T	Insertion	1	-	T	10	70822	0.0141199	43.1	rnr1D57N	FALSE	CAN	JSY14	4	rnr1D57N-Rep4	ATT	nope	A/T+1	>1bpdel	none	A/T+1	TGATAATTACCCA	TTACCCA	TAA	ATT	-	A	NA	NA_ATT	A/T+1_TTACCCA	7	FALSE	FALSE
15_v.txt	32842	32842-Insertion---A	Insertion	1	-	A	169	70822	0.238626	42.7633	rnr1D57N	FALSE	CAN	JSY14	4	rnr1D57N-Rep4	CAA	nope	A/T+1	>1bpdel	none	A/T+1	TTACCCAAAAAAT	AAAAAAT	GTT	CAA	-	T	NA	NA_CAA	A/T+1_AAAAAAT	7	FALSE	FALSE
15_v.txt	32884	32884-Insertion---A	Insertion	1	-	A	16	75142	0.021293	37.9375	rnr1D57N	FALSE	CAN	JSY14	4	rnr1D57N-Rep4	CAA	nope	A/T+1	>1bpdel	none	A/T+1	ACGTCCAAAATTG	AAAATTG	GTT	CAA	-	T	NA	NA_CAA	A/T+1_AAAATTG	7	FALSE	FALSE
15_v.txt	33206	33206-Insertion---CT	Insertion	2	-	CT	1	61063	0.00164	38	rnr1D57N	FALSE	CAN	JSY14	4	rnr1D57N-Rep4	GCT	nope	>1bp-ins	>1bpdel	none	>1bp-ins	CTTAAGCTCTCTC	CTCTCTC	CGA	GCT	-	none	NA	NA_GCT	>1bp-ins_CTCTCTC	7	FALSE	FALSE
15_v.txt	33356	33356-Insertion---C	Insertion	1	-	C	4	61063	0.00655	54.5	rnr1D57N	FALSE	CAN	JSY14	4	rnr1D57N-Rep4	ACC	nope	G/C+1	>1bpdel	none	G/C+1	TATTGACCCACGT	CCCACGT	TGG	ACC	-	G	NA	NA_ACC	G/C+1_CCCACGT	7	FALSE	FALSE
15_v.txt	32157	32157-Deletion-GCCAAAGC--	Deletion	8	GCCAAAGC	-	356	64665	0.55053	51.6798	rnr1D57N	FALSE	CAN	JSY14	4	rnr1D57N-Rep4	AGC	nope	>1bp-ins	>1bpdel	none	>1bpdel	ATGTAAGCCAAAG	GCCAAAG	TCG	AGC	GCCAAAGC	none	NA	NA_AGC	>1bpdel_GCCAAAG	7	FALSE	FALSE
15_v.txt	32158	32158-Deletion-CC--	Deletion	2	CC	-	1	64665	0.00155	11	rnr1D57N	FALSE	CAN	JSY14	4	rnr1D57N-Rep4	GCC	nope	>1bp-ins	>1bpdel	none	>1bpdel	TGTAAGCCAAAGC	CCAAAGC	CGG	GCC	CC	none	NA	NA_GCC	>1bpdel_CCAAAGC	7	FALSE	FALSE
15_v.txt	32161	32161-Deletion-AAGC--	Deletion	4	AAGC	-	1	64665	0.00155	38	rnr1D57N	FALSE	CAN	JSY14	4	rnr1D57N-Rep4	AAA	nope	>1bp-ins	>1bpdel	none	>1bpdel	AAGCCAAAGCGCC	AAGCGCC	TTT	AAA	AAGC	none	NA	NA_AAA	>1bpdel_AAGCGCC	7	FALSE	FALSE
15_v.txt	32455	32455-Deletion-AT--	Deletion	2	AT	-	48	72336	0.066357	52.5208	rnr1D57N	FALSE	CAN	JSY14	4	rnr1D57N-Rep4	AAT	nope	>1bp-ins	>1bpdel	none	>1bpdel	CAATGAATAATAG	ATAATAG	TTA	AAT	AT	none	NA	NA_AAT	>1bpdel_ATAATAG	7	FALSE	FALSE
15_v.txt	32458	32458-Deletion-AT--	Deletion	2	AT	-	75	72336	0.103683	53.44	rnr1D57N	FALSE	CAN	JSY14	4	rnr1D57N-Rep4	AAT	nope	>1bp-ins	>1bpdel	none	>1bpdel	TGAATAATAGAGA	ATAGAGA	TTA	AAT	AT	none	NA	NA_AAT	>1bpdel_ATAGAGA	7	FALSE	FALSE
15_v.txt	32928	32928-Deletion-GT--	Deletion	2	GT	-	9	75142	0.0119773	46.1111	rnr1D57N	FALSE	CAN	JSY14	4	rnr1D57N-Rep4	AGT	nope	>1bp-ins	>1bpdel	none	>1bpdel	GCAAAAGTGATTG	GTGATTG	TCA	AGT	GT	none	NA	NA_AGT	>1bpdel_GTGATTG	7	FALSE	FALSE
15_v.txt	33368	33368-Deletion-GT--	Deletion	2	GT	-	8	61063	0.0131012	60.875	rnr1D57N	FALSE	CAN	JSY14	4	rnr1D57N-Rep4	GGT	nope	>1bp-ins	>1bpdel	none	>1bpdel	TCTGTGGTGTGTT	GTGTGTT	CCA	GGT	GT	none	NA	NA_GGT	>1bpdel_GTGTGTT	7	FALSE	FALSE
15_v.txt	31663	31663-Deletion-A--	Deletion	1	A	-	6	25145	0.0238616	36.5	rnr1D57N	FALSE	CAN	JSY14	4	rnr1D57N-Rep4	GAA	nope	>1bp-ins	A/T-1	none	A/T-1	GCGTGGAAATGTG	AAATGTG	CTT	CTT	T	none	T>none	T>none_CTT	A/T-1_AAATGTG	7	FALSE	FALSE
15_v.txt	31723	31723-Deletion-A--	Deletion	1	A	-	29	25145	0.115331	58.7931	rnr1D57N	FALSE	CAN	JSY14	4	rnr1D57N-Rep4	CAA	nope	>1bp-ins	A/T-1	none	A/T-1	TGTCCCAAAAAGT	AAAAAGT	GTT	GTT	T	none	T>none	T>none_GTT	A/T-1_AAAAAGT	7	FALSE	FALSE
15_v.txt	31863	31863-Deletion-A--	Deletion	1	A	-	6	25145	0.0238616	42	rnr1D57N	FALSE	CAN	JSY14	4	rnr1D57N-Rep4	GAA	nope	>1bp-ins	A/T-1	none	A/T-1	AACAGGAAAATAG	AAAATAG	CTT	CTT	T	none	T>none	T>none_CTT	A/T-1_AAAATAG	7	FALSE	FALSE
15_v.txt	31904	31904-Deletion-T--	Deletion	1	T	-	11	25145	0.0437463	46.8182	rnr1D57N	FALSE	CAN	JSY14	4	rnr1D57N-Rep4	ATT	nope	>1bp-ins	A/T-1	none	A/T-1	ATTGAATTTTGGT	TTTTGGT	TAA	ATT	T	none	nope	nope_ATT	A/T-1_TTTTGGT	7	FALSE	FALSE
15_v.txt	31913	31913-Deletion-A--	Deletion	1	A	-	6	25145	0.0238616	38	rnr1D57N	FALSE	CAN	JSY14	4	rnr1D57N-Rep4	CAA	nope	>1bp-ins	A/T-1	none	A/T-1	TGGTGCAAAAGCC	AAAAGCC	GTT	GTT	T	none	T>none	T>none_GTT	A/T-1_AAAAGCC	7	FALSE	FALSE
15_v.txt	31952	31952-Deletion-A--	Deletion	1	A	-	9	64726	0.0139048	33.2222	rnr1D57N	FALSE	CAN	JSY14	4	rnr1D57N-Rep4	TAA	nope	>1bp-ins	A/T-1	none	A/T-1	CGTCATAAATGTG	AAATGTG	ATT	ATT	T	none	T>none	T>none_ATT	A/T-1_AAATGTG	7	FALSE	FALSE
15_v.txt	31971	31971-Deletion-G--	Deletion	1	G	-	43490	64727	67.1899	37.4167	rnr1D57N	FALSE	CAN	JSY14	4	rnr1D57N-Rep4	AGC	nope	>1bp-ins	G/C-1	none	G/C-1	TAATAAGCCAAGC	GCCAAGC	TCG	TCG	C	none	C>none	C>none_TCG	G/C-1_GCCAAGC	7	FALSE	FALSE
15_v.txt	31979	31979-Deletion-G--	Deletion	1	G	-	64	64727	0.0988768	43.1406	rnr1D57N	FALSE	CAN	JSY14	4	rnr1D57N-Rep4	CGG	nope	>1bp-ins	G/C-1	none	G/C-1	CAAGCCGGGCATT	GGGCATT	GCC	GCC	C	none	C>none	C>none_GCC	G/C-1_GGGCATT	7	FALSE	FALSE
15_v.txt	32056	32056-Deletion-G--	Deletion	1	G	-	256	64727	0.395507	62.668	rnr1D57N	FALSE	CAN	JSY14	4	rnr1D57N-Rep4	TGC	nope	>1bp-ins	G/C-1	none	G/C-1	TGATGTGCGAGAT	GCGAGAT	ACG	ACG	C	none	C>none	C>none_ACG	G/C-1_GCGAGAT	7	FALSE	FALSE
15_v.txt	32069	32069-Deletion-A--	Deletion	1	A	-	7	64727	0.0108147	64	rnr1D57N	FALSE	CAN	JSY14	4	rnr1D57N-Rep4	TAA	nope	>1bp-ins	A/T-1	none	A/T-1	TGAGATAAATAAC	AAATAAC	ATT	ATT	T	none	T>none	T>none_ATT	A/T-1_AAATAAC	7	FALSE	FALSE
15_v.txt	32081	32081-Deletion-A--	Deletion	1	A	-	64	64727	0.0988768	62.5938	rnr1D57N	FALSE	CAN	JSY14	4	rnr1D57N-Rep4	CAA	nope	>1bp-ins	A/T-1	none	A/T-1	CCATGCAAAAAAG	AAAAAAG	GTT	GTT	T	none	T>none	T>none_GTT	A/T-1_AAAAAAG	7	FALSE	FALSE
15_v.txt	32133	32133-Deletion-C--	Deletion	1	C	-	7	64665	0.010825	60	rnr1D57N	FALSE	CAN	JSY14	4	rnr1D57N-Rep4	ACC	nope	>1bp-ins	G/C-1	none	G/C-1	TTGTCACCACCAG	CCACCAG	TGG	ACC	C	none	nope	nope_ACC	G/C-1_CCACCAG	7	FALSE	FALSE
15_v.txt	32160	32160-Deletion-A--	Deletion	1	A	-	13	64665	0.0201036	47.4615	rnr1D57N	FALSE	CAN	JSY14	4	rnr1D57N-Rep4	CAA	nope	>1bp-ins	A/T-1	none	A/T-1	TAAGCCAAAGCGC	AAAGCGC	GTT	GTT	T	none	T>none	T>none_GTT	A/T-1_AAAGCGC	7	FALSE	FALSE
15_v.txt	32184	32184-Deletion-A--	Deletion	1	A	-	15	64665	0.0231965	48.4667	rnr1D57N	FALSE	CAN	JSY14	4	rnr1D57N-Rep4	GAA	nope	>1bp-ins	A/T-1	none	A/T-1	GTAACGAAAACTG	AAAACTG	CTT	CTT	T	none	T>none	T>none_CTT	A/T-1_AAAACTG	7	FALSE	FALSE
15_v.txt	32378	32378-Deletion-A--	Deletion	1	A	-	9	72336	0.0124419	63.1111	rnr1D57N	FALSE	CAN	JSY14	4	rnr1D57N-Rep4	TAA	nope	>1bp-ins	A/T-1	none	A/T-1	AGCAATAATAAAG	AATAAAG	ATT	ATT	T	none	T>none	T>none_ATT	A/T-1_AATAAAG	7	FALSE	FALSE
15_v.txt	32416	32416-Deletion-T--	Deletion	1	T	-	8	72336	0.0110595	59	rnr1D57N	FALSE	CAN	JSY14	4	rnr1D57N-Rep4	GTT	nope	>1bp-ins	A/T-1	none	A/T-1	ATTGTGTTAGTTT	TTAGTTT	CAA	GTT	T	none	nope	nope_GTT	A/T-1_TTAGTTT	7	FALSE	FALSE
15_v.txt	32442	32442-Deletion-A--	Deletion	1	A	-	12	72336	0.0165892	57.5	rnr1D57N	FALSE	CAN	JSY14	4	rnr1D57N-Rep4	TAA	nope	>1bp-ins	A/T-1	none	A/T-1	GGAACTAAAAGTC	AAAAGTC	ATT	ATT	T	none	T>none	T>none_ATT	A/T-1_AAAAGTC	7	FALSE	FALSE
15_v.txt	32490	32490-Deletion-A--	Deletion	1	A	-	441	72335	0.609663	45.263	rnr1D57N	FALSE	CAN	JSY14	4	rnr1D57N-Rep4	GAA	nope	>1bp-ins	A/T-1	none	A/T-1	ATACGGAAAACAA	AAAACAA	CTT	CTT	T	none	T>none	T>none_CTT	A/T-1_AAAACAA	7	FALSE	FALSE
15_v.txt	32498	32498-Deletion-T--	Deletion	1	T	-	82	72336	0.11336	45.3415	rnr1D57N	FALSE	CAN	JSY14	4	rnr1D57N-Rep4	CTT	nope	>1bp-ins	A/T-1	none	A/T-1	AACAACTTTTTTG	TTTTTTG	GAA	CTT	T	none	nope	nope_CTT	A/T-1_TTTTTTG	7	FALSE	FALSE
15_v.txt	32519	32519-Deletion-G--	Deletion	1	G	-	46	72336	0.0635921	43.6522	rnr1D57N	FALSE	CAN	JSY14	4	rnr1D57N-Rep4	CGG	nope	>1bp-ins	G/C-1	none	G/C-1	TGGAACGGATTTT	GGATTTT	GCC	GCC	C	none	C>none	C>none_GCC	G/C-1_GGATTTT	7	FALSE	FALSE
15_v.txt	32522	32522-Deletion-T--	Deletion	1	T	-	30	72336	0.0414731	39.6667	rnr1D57N	FALSE	CAN	JSY14	4	rnr1D57N-Rep4	ATT	nope	>1bp-ins	A/T-1	none	A/T-1	AACGGATTTTCTG	TTTTCTG	TAA	ATT	T	none	nope	nope_ATT	A/T-1_TTTTCTG	7	FALSE	FALSE
15_v.txt	32528	32528-Deletion-G--	Deletion	1	G	-	13	72336	0.0179717	36.7692	rnr1D57N	FALSE	CAN	JSY14	4	rnr1D57N-Rep4	TGG	nope	>1bp-ins	G/C-1	none	G/C-1	TTTTCTGGGGTTT	GGGGTTT	ACC	ACC	C	none	C>none	C>none_ACC	G/C-1_GGGGTTT	7	FALSE	FALSE
15_v.txt	32583	32583-Deletion-A--	Deletion	1	A	-	9	70822	0.0127079	37.6667	rnr1D57N	FALSE	CAN	JSY14	4	rnr1D57N-Rep4	GAA	nope	>1bp-ins	A/T-1	none	A/T-1	AATGTGAAGGCAG	AAGGCAG	CTT	CTT	T	none	T>none	T>none_CTT	A/T-1_AAGGCAG	7	FALSE	FALSE
15_v.txt	32598	32598-Deletion-A--	Deletion	1	A	-	12	70822	0.0169439	39.4167	rnr1D57N	FALSE	CAN	JSY14	4	rnr1D57N-Rep4	CAA	nope	>1bp-ins	A/T-1	none	A/T-1	TTAATCAAAGAGG	AAAGAGG	GTT	GTT	T	none	T>none	T>none_GTT	A/T-1_AAAGAGG	7	FALSE	FALSE
15_v.txt	32624	32624-Deletion-C--	Deletion	1	C	-	18	70822	0.0254158	49.0556	rnr1D57N	FALSE	CAN	JSY14	4	rnr1D57N-Rep4	TCC	nope	>1bp-ins	G/C-1	none	G/C-1	GAACCTCCCTTCG	CCCTTCG	AGG	TCC	C	none	nope	nope_TCC	G/C-1_CCCTTCG	7	FALSE	FALSE
15_v.txt	32631	32631-Deletion-T--	Deletion	1	T	-	20	70822	0.0282398	46.55	rnr1D57N	FALSE	CAN	JSY14	4	rnr1D57N-Rep4	GTT	nope	>1bp-ins	A/T-1	none	A/T-1	CCTTCGTTTTTAT	TTTTTAT	CAA	GTT	T	none	nope	nope_GTT	A/T-1_TTTTTAT	7	FALSE	FALSE
15_v.txt	32658	32658-Deletion-C--	Deletion	1	C	-	25	70822	0.0352998	54.8	rnr1D57N	FALSE	CAN	JSY14	4	rnr1D57N-Rep4	ACC	nope	>1bp-ins	G/C-1	none	G/C-1	CCTGGACCCCAGG	CCCCAGG	TGG	ACC	C	none	nope	nope_ACC	G/C-1_CCCCAGG	7	FALSE	FALSE
15_v.txt	32670	32670-Deletion-G--	Deletion	1	G	-	28	70822	0.0395357	58.3571	rnr1D57N	FALSE	CAN	JSY14	4	rnr1D57N-Rep4	TGG	nope	>1bp-ins	G/C-1	none	G/C-1	GCACCTGGGTTTC	GGGTTTC	ACC	ACC	C	none	C>none	C>none_ACC	G/C-1_GGGTTTC	7	FALSE	FALSE
15_v.txt	32678	32678-Deletion-C--	Deletion	1	C	-	4	70821	0.00565	64	rnr1D57N	FALSE	CAN	JSY14	4	rnr1D57N-Rep4	TCC	nope	>1bp-ins	G/C-1	none	G/C-1	GTTTCTCCAATAA	CCAATAA	AGG	TCC	C	none	nope	nope_TCC	G/C-1_CCAATAA	7	FALSE	FALSE
15_v.txt	32680	32680-Deletion-A--	Deletion	1	A	-	3	70822	0.00424	42	rnr1D57N	FALSE	CAN	JSY14	4	rnr1D57N-Rep4	CAA	nope	>1bp-ins	A/T-1	none	A/T-1	TTCTCCAATAACG	AATAACG	GTT	GTT	T	none	T>none	T>none_GTT	A/T-1_AATAACG	7	FALSE	FALSE
15_v.txt	32707	32707-Deletion-C--	Deletion	1	C	-	11	70822	0.0155319	61.2727	rnr1D57N	FALSE	CAN	JSY14	4	rnr1D57N-Rep4	ACC	nope	>1bp-ins	G/C-1	none	G/C-1	CGGTAACCCCAGC	CCCCAGC	TGG	ACC	C	none	nope	nope_ACC	G/C-1_CCCCAGC	7	FALSE	FALSE
15_v.txt	32728	32728-Deletion-A--	Deletion	1	A	-	183	70820	0.258402	60.7596	rnr1D57N	FALSE	CAN	JSY14	4	rnr1D57N-Rep4	CAA	nope	>1bp-ins	A/T-1	none	A/T-1	CCATACAAAAACA	AAAAACA	GTT	GTT	T	none	T>none	T>none_GTT	A/T-1_AAAAACA	7	FALSE	FALSE
15_v.txt	32760	32760-Deletion-A--	Deletion	1	A	-	10	70822	0.0141199	54.6	rnr1D57N	FALSE	CAN	JSY14	4	rnr1D57N-Rep4	TAA	nope	>1bp-ins	A/T-1	none	A/T-1	ATGGCTAAAACTT	AAAACTT	ATT	ATT	T	none	T>none	T>none_ATT	A/T-1_AAAACTT	7	FALSE	FALSE
15_v.txt	32779	32779-Deletion-C--	Deletion	1	C	-	17	70822	0.0240038	54.2941	rnr1D57N	FALSE	CAN	JSY14	4	rnr1D57N-Rep4	ACC	nope	>1bp-ins	G/C-1	none	G/C-1	AAGCGACCCAGAA	CCCAGAA	TGG	ACC	C	none	nope	nope_ACC	G/C-1_CCCAGAA	7	FALSE	FALSE
15_v.txt	32800	32800-Deletion-A--	Deletion	1	A	-	3	70822	0.00424	38	rnr1D57N	FALSE	CAN	JSY14	4	rnr1D57N-Rep4	TAA	nope	>1bp-ins	A/T-1	none	A/T-1	CACCGTAATATTT	AATATTT	ATT	ATT	T	none	T>none	T>none_ATT	A/T-1_AATATTT	7	FALSE	FALSE
15_v.txt	32807	32807-Deletion-G--	Deletion	1	G	-	45	70822	0.0635396	45.7778	rnr1D57N	FALSE	CAN	JSY14	4	rnr1D57N-Rep4	TGA	nope	>1bp-ins	G/C-1	none	G/C-1	ATATTTGACAGGG	GACAGGG	ACT	ACT	C	none	C>none	C>none_ACT	G/C-1_GACAGGG	7	FALSE	FALSE
15_v.txt	32842	32842-Deletion-A--	Deletion	1	A	-	130	70822	0.183559	42.4923	rnr1D57N	FALSE	CAN	JSY14	4	rnr1D57N-Rep4	CAA	nope	>1bp-ins	A/T-1	none	A/T-1	TTACCCAAAAAAT	AAAAAAT	GTT	GTT	T	none	T>none	T>none_GTT	A/T-1_AAAAAAT	7	FALSE	FALSE
15_v.txt	32884	32884-Deletion-A--	Deletion	1	A	-	11	75142	0.0146389	37.7273	rnr1D57N	FALSE	CAN	JSY14	4	rnr1D57N-Rep4	CAA	nope	>1bp-ins	A/T-1	none	A/T-1	ACGTCCAAAATTG	AAAATTG	GTT	GTT	T	none	T>none	T>none_GTT	A/T-1_AAAATTG	7	FALSE	FALSE
15_v.txt	32901	32901-Deletion-C--	Deletion	1	C	-	2	75142	0.00266	38	rnr1D57N	FALSE	CAN	JSY14	4	rnr1D57N-Rep4	GCC	nope	>1bp-ins	G/C-1	none	G/C-1	ACTTGGCCAACTA	CCAACTA	CGG	GCC	C	none	nope	nope_GCC	G/C-1_CCAACTA	7	FALSE	FALSE
15_v.txt	32924	32924-Deletion-A--	Deletion	1	A	-	55	75142	0.0731948	50.5273	rnr1D57N	FALSE	CAN	JSY14	4	rnr1D57N-Rep4	CAA	nope	>1bp-ins	A/T-1	none	A/T-1	CAGGGCAAAAGTG	AAAAGTG	GTT	GTT	T	none	T>none	T>none_GTT	A/T-1_AAAAGTG	7	FALSE	FALSE
15_v.txt	32935	32935-Deletion-C--	Deletion	1	C	-	6	75142	0.00799	54	rnr1D57N	FALSE	CAN	JSY14	4	rnr1D57N-Rep4	GCC	nope	>1bp-ins	G/C-1	none	G/C-1	TGATTGCCCAAGA	CCCAAGA	CGG	GCC	C	none	nope	nope_GCC	G/C-1_CCCAAGA	7	FALSE	FALSE
15_v.txt	33045	33045-Deletion-C--	Deletion	1	C	-	10	75142	0.0133081	64	rnr1D57N	FALSE	CAN	JSY14	4	rnr1D57N-Rep4	ACC	nope	>1bp-ins	G/C-1	none	G/C-1	ATTTCACCCAAGG	CCCAAGG	TGG	ACC	C	none	nope	nope_ACC	G/C-1_CCCAAGG	7	FALSE	FALSE
15_v.txt	33083	33083-Deletion-A--	Deletion	1	A	-	11	75142	0.0146389	50.8182	rnr1D57N	FALSE	CAN	JSY14	4	rnr1D57N-Rep4	TAA	nope	>1bp-ins	A/T-1	none	A/T-1	ACCCATAAATAAA	AAATAAA	ATT	ATT	T	none	T>none	T>none_ATT	A/T-1_AAATAAA	7	FALSE	FALSE
15_v.txt	33087	33087-Deletion-A--	Deletion	1	A	-	4	75142	0.00532	63.75	rnr1D57N	FALSE	CAN	JSY14	4	rnr1D57N-Rep4	TAA	nope	>1bp-ins	A/T-1	none	A/T-1	ATAAATAAATATG	AAATATG	ATT	ATT	T	none	T>none	T>none_ATT	A/T-1_AAATATG	7	FALSE	FALSE
15_v.txt	33111	33111-Deletion-G--	Deletion	1	G	-	37	75142	0.0492401	41.027	rnr1D57N	FALSE	CAN	JSY14	4	rnr1D57N-Rep4	TGG	nope	>1bp-ins	G/C-1	none	G/C-1	CCCACTGGGCCGG	GGGCCGG	ACC	ACC	C	none	C>none	C>none_ACC	G/C-1_GGGCCGG	7	FALSE	FALSE
15_v.txt	33138	33138-Deletion-A--	Deletion	1	A	-	9	75141	0.0119775	43.7778	rnr1D57N	FALSE	CAN	JSY14	4	rnr1D57N-Rep4	TAA	nope	>1bp-ins	A/T-1	none	A/T-1	GTGGATAAACCAA	AAACCAA	ATT	ATT	T	none	T>none	T>none_ATT	A/T-1_AAACCAA	7	FALSE	FALSE
15_v.txt	33147	33147-Deletion-A--	Deletion	1	A	-	14	75141	0.0186316	39.6429	rnr1D57N	FALSE	CAN	JSY14	4	rnr1D57N-Rep4	GAA	nope	>1bp-ins	A/T-1	none	A/T-1	CCAATGAAAAGAC	AAAAGAC	CTT	CTT	T	none	T>none	T>none_CTT	A/T-1_AAAAGAC	7	FALSE	FALSE
15_v.txt	33168	33168-Deletion-C--	Deletion	1	C	-	5	75126	0.00666	38	rnr1D57N	FALSE	CAN	JSY14	4	rnr1D57N-Rep4	ACC	nope	>1bp-ins	G/C-1	none	G/C-1	ATAGTACCACCAA	CCACCAA	TGG	ACC	C	none	nope	nope_ACC	G/C-1_CCACCAA	7	FALSE	FALSE
15_v.txt	33303	33303-Deletion-A--	Deletion	1	A	-	10	61063	0.0163765	51.3	rnr1D57N	FALSE	CAN	JSY14	4	rnr1D57N-Rep4	GAA	nope	>1bp-ins	A/T-1	none	A/T-1	GTCGGGAAAGAGC	AAAGAGC	CTT	CTT	T	none	T>none	T>none_CTT	A/T-1_AAAGAGC	7	FALSE	FALSE
15_v.txt	33317	33317-Deletion-A--	Deletion	1	A	-	8	61063	0.0131012	59.375	rnr1D57N	FALSE	CAN	JSY14	4	rnr1D57N-Rep4	GAT	nope	>1bp-ins	A/T-1	none	A/T-1	CAATGGATACAAT	ATACAAT	CTA	CTA	T	none	T>none	T>none_CTA	A/T-1_ATACAAT	7	FALSE	FALSE
15_v.txt	33326	33326-Deletion-T--	Deletion	1	T	-	8	61060	0.0131019	58.625	rnr1D57N	FALSE	CAN	JSY14	4	rnr1D57N-Rep4	CTT	nope	>1bp-ins	A/T-1	none	A/T-1	CAATTCTTTACTT	TTTACTT	GAA	CTT	T	none	nope	nope_CTT	A/T-1_TTTACTT	7	FALSE	FALSE
15_v.txt	33356	33356-Deletion-C--	Deletion	1	C	-	12	61063	0.0196518	51.8333	rnr1D57N	FALSE	CAN	JSY14	4	rnr1D57N-Rep4	ACC	nope	>1bp-ins	G/C-1	none	G/C-1	TATTGACCCACGT	CCCACGT	TGG	ACC	C	none	nope	nope_ACC	G/C-1_CCCACGT	7	FALSE	FALSE
15_v.txt	33474	33474-Deletion-C--	Deletion	1	C	-	148	61063	0.242373	29.0203	rnr1D57N	FALSE	CAN	JSY14	4	rnr1D57N-Rep4	GCC	nope	>1bp-ins	G/C-1	none	G/C-1	GCTATGCCTTTTT	CCTTTTT	CGG	GCC	C	none	nope	nope_GCC	G/C-1_CCTTTTT	7	FALSE	FALSE
186_v.txt	32081	32081-SNV-A-C	SNV	1	A	C	2	12563	0.0159198	37.5003	rnr1D57N	FALSE	CAN	JSY14	5	rnr1D57N-Rep5	CAA	A>C	G/C+1	A/T-1	TA>GC	TA>GC	CCATGCAAAAAAG	AAAAAAG	GTT	GTT	T	G	T>G	T>G_GTT	TA>GC_AAAAAAG	7	FALSE	FALSE
186_v.txt	32256	32256-SNV-A-C	SNV	1	A	C	19	27637	0.0687484	24.4737	rnr1D57N	FALSE	CAN	JSY14	5	rnr1D57N-Rep5	TAG	A>C	G/C+1	A/T-1	TA>GC	TA>GC	TTTGATAGACCAA	AGACCAA	ATC	ATC	T	G	T>G	T>G_ATC	TA>GC_AGACCAA	7	FALSE	FALSE
186_v.txt	32265	32265-SNV-A-C	SNV	1	A	C	25	27652	0.0904094	26.44	rnr1D57N	FALSE	CAN	JSY14	5	rnr1D57N-Rep5	TAA	A>C	G/C+1	A/T-1	TA>GC	TA>GC	CCAAATAAAATAC	AAAATAC	ATT	ATT	T	G	T>G	T>G_ATT	TA>GC_AAAATAC	7	FALSE	FALSE
186_v.txt	32283	32283-SNV-T-G	SNV	1	T	G	832	27652	3.00882	51.369	rnr1D57N	FALSE	CAN	JSY14	5	rnr1D57N-Rep5	GTA	T>G	G/C+1	A/T-1	TA>GC	TA>GC	CCAACGTAAATAT	TAAATAT	CAT	GTA	T	C	T>G	T>G_GTA	TA>GC_TAAATAT	7	FALSE	FALSE
186_v.txt	32439	32439-SNV-A-C	SNV	1	A	C	8	27653	0.02893	60.75	rnr1D57N	FALSE	CAN	JSY14	5	rnr1D57N-Rep5	AAC	A>C	G/C+1	A/T-1	TA>GC	TA>GC	TATGGAACTAAAA	ACTAAAA	TTG	TTG	T	G	T>G	T>G_TTG	TA>GC_ACTAAAA	7	FALSE	FALSE
186_v.txt	32640	32640-SNV-T-G	SNV	1	T	G	4	17176	0.0232883	57.5	rnr1D57N	FALSE	CAN	JSY14	5	rnr1D57N-Rep5	CTT	T>G	G/C+1	A/T-1	TA>GC	TA>GC	TTATCCTTAGATA	TTAGATA	GAA	CTT	T	C	T>G	T>G_CTT	TA>GC_TTAGATA	7	FALSE	FALSE
186_v.txt	32842	32842-SNV-A-C	SNV	1	A	C	2	17176	0.0116442	36	rnr1D57N	FALSE	CAN	JSY14	5	rnr1D57N-Rep5	CAA	A>C	G/C+1	A/T-1	TA>GC	TA>GC	TTACCCAAAAAAT	AAAAAAT	GTT	GTT	T	G	T>G	T>G_GTT	TA>GC_AAAAAAT	7	FALSE	FALSE
186_v.txt	32884	32884-SNV-A-C	SNV	1	A	C	10	29334	0.0340901	28.2	rnr1D57N	FALSE	CAN	JSY14	5	rnr1D57N-Rep5	CAA	A>C	G/C+1	A/T-1	TA>GC	TA>GC	ACGTCCAAAATTG	AAAATTG	GTT	GTT	T	G	T>G	T>G_GTT	TA>GC_AAAATTG	7	FALSE	FALSE
186_v.txt	32938	32938-SNV-A-C	SNV	1	A	C	6	29334	0.0204541	31.0008	rnr1D57N	FALSE	CAN	JSY14	5	rnr1D57N-Rep5	CAA	A>C	G/C+1	A/T-1	TA>GC	TA>GC	TTGCCCAAGAAAA	AAGAAAA	GTT	GTT	T	G	T>G	T>G_GTT	TA>GC_AAGAAAA	7	FALSE	FALSE
186_v.txt	33269	33269-SNV-A-C	SNV	1	A	C	167	21090	0.791844	16.1737	rnr1D57N	FALSE	CAN	JSY14	5	rnr1D57N-Rep5	TAG	A>C	G/C+1	A/T-1	TA>GC	TA>GC	CTCCATAGAGAAC	AGAGAAC	ATC	ATC	T	G	T>G	T>G_ATC	TA>GC_AGAGAAC	7	FALSE	FALSE
186_v.txt	32218	32218-SNV-T-C	SNV	1	T	C	3	12564	0.0238777	32.6656	rnr1D57N	FALSE	CAN	JSY14	5	rnr1D57N-Rep5	GTC	T>C	G/C+1	A/T-1	TA>CG	TA>CG	TGGTGGTCCTTGA	TCCTTGA	CAG	GTC	T	G	T>C	T>C_GTC	TA>CG_TCCTTGA	7	FALSE	FALSE
186_v.txt	32256	32256-SNV-A-G	SNV	1	A	G	16	27637	0.0578934	36.8125	rnr1D57N	FALSE	CAN	JSY14	5	rnr1D57N-Rep5	TAG	A>G	G/C+1	A/T-1	TA>CG	TA>CG	TTTGATAGACCAA	AGACCAA	ATC	ATC	T	C	T>C	T>C_ATC	TA>CG_AGACCAA	7	FALSE	FALSE
186_v.txt	32305	32305-SNV-A-G	SNV	1	A	G	32	27653	0.11572	59.4688	rnr1D57N	FALSE	CAN	JSY14	5	rnr1D57N-Rep5	GAA	A>G	G/C+1	A/T-1	TA>CG	TA>CG	CGGCAGAAATAAT	AAATAAT	CTT	CTT	T	C	T>C	T>C_CTT	TA>CG_AAATAAT	7	FALSE	FALSE
186_v.txt	32454	32454-SNV-A-G	SNV	1	A	G	5	27653	0.0180812	58.7985	rnr1D57N	FALSE	CAN	JSY14	5	rnr1D57N-Rep5	GAA	A>G	G/C+1	A/T-1	TA>CG	TA>CG	CCAATGAATAATA	AATAATA	CTT	CTT	T	C	T>C	T>C_CTT	TA>CG_AATAATA	7	FALSE	FALSE
186_v.txt	32455	32455-SNV-A-G	SNV	1	A	G	4	27653	0.014465	41.7499	rnr1D57N	FALSE	CAN	JSY14	5	rnr1D57N-Rep5	AAT	A>G	G/C+1	A/T-1	TA>CG	TA>CG	CAATGAATAATAG	ATAATAG	TTA	TTA	T	C	T>C	T>C_TTA	TA>CG_ATAATAG	7	FALSE	FALSE
186_v.txt	32503	32503-SNV-T-C	SNV	1	T	C	23	27653	0.0831736	41.2609	rnr1D57N	FALSE	CAN	JSY14	5	rnr1D57N-Rep5	TTG	T>C	G/C+1	A/T-1	TA>CG	TA>CG	CTTTTTTGATGGC	TGATGGC	AAC	TTG	T	G	T>C	T>C_TTG	TA>CG_TGATGGC	7	FALSE	FALSE
186_v.txt	32583	32583-SNV-A-G	SNV	1	A	G	44	17176	0.256171	36.75	rnr1D57N	FALSE	CAN	JSY14	5	rnr1D57N-Rep5	GAA	A>G	G/C+1	A/T-1	TA>CG	TA>CG	AATGTGAAGGCAG	AAGGCAG	CTT	CTT	T	C	T>C	T>C_CTT	TA>CG_AAGGCAG	7	FALSE	FALSE
186_v.txt	32680	32680-SNV-A-G	SNV	1	A	G	17	17176	0.0989753	58.8824	rnr1D57N	FALSE	CAN	JSY14	5	rnr1D57N-Rep5	CAA	A>G	G/C+1	A/T-1	TA>CG	TA>CG	TTCTCCAATAACG	AATAACG	GTT	GTT	T	C	T>C	T>C_GTT	TA>CG_AATAACG	7	FALSE	FALSE
186_v.txt	32919	32919-SNV-A-G	SNV	1	A	G	23	29334	0.0784073	46.3043	rnr1D57N	FALSE	CAN	JSY14	5	rnr1D57N-Rep5	CAG	A>G	G/C+1	A/T-1	TA>CG	TA>CG	AGTTCCAGGGCAA	AGGGCAA	GTC	GTC	T	C	T>C	T>C_GTC	TA>CG_AGGGCAA	7	FALSE	FALSE
186_v.txt	32938	32938-SNV-A-G	SNV	1	A	G	25	29334	0.0852253	55.28	rnr1D57N	FALSE	CAN	JSY14	5	rnr1D57N-Rep5	CAA	A>G	G/C+1	A/T-1	TA>CG	TA>CG	TTGCCCAAGAAAA	AAGAAAA	GTT	GTT	T	C	T>C	T>C_GTT	TA>CG_AAGAAAA	7	FALSE	FALSE
186_v.txt	31816	31816-SNV-T-A	SNV	1	T	A	7	3690	0.189702	56.4286	rnr1D57N	FALSE	CAN	JSY14	5	rnr1D57N-Rep5	CTG	T>A	A/T+1	A/T-1	TA>AT	TA>AT	TAAATCTGCATCT	TGCATCT	GAC	CTG	T	T	T>A	T>A_CTG	TA>AT_TGCATCT	7	FALSE	FALSE
186_v.txt	32215	32215-SNV-T-A	SNV	1	T	A	1	12564	0.00796	37.9977	rnr1D57N	FALSE	CAN	JSY14	5	rnr1D57N-Rep5	GTG	T>A	A/T+1	A/T-1	TA>AT	TA>AT	CTTTGGTGGTCCT	TGGTCCT	CAC	GTG	T	T	T>A	T>A_GTG	TA>AT_TGGTCCT	7	FALSE	FALSE
186_v.txt	32288	32288-SNV-A-T	SNV	1	A	T	16	27652	0.057862	46.4375	rnr1D57N	FALSE	CAN	JSY14	5	rnr1D57N-Rep5	TAT	A>T	A/T+1	A/T-1	TA>AT	TA>AT	GTAAATATTTGAA	ATTTGAA	ATA	ATA	T	A	T>A	T>A_ATA	TA>AT_ATTTGAA	7	FALSE	FALSE
186_v.txt	31962	31962-SNV-G-A	SNV	1	G	A	23	12564	0.183063	37.8261	rnr1D57N	FALSE	CAN	JSY14	5	rnr1D57N-Rep5	CGC	G>A	A/T+1	G/C-1	CG>TA	CG>TA	GTGGCCGCATAAT	GCATAAT	GCG	GCG	C	T	C>T	C>T_GCG	CG>TA_GCATAAT	7	FALSE	FALSE
186_v.txt	32076	32076-SNV-C-T	SNV	1	C	T	58	12564	0.461636	62.1552	rnr1D57N	FALSE	CAN	JSY14	5	rnr1D57N-Rep5	CCA	C>T	A/T+1	G/C-1	CG>TA	CG>TA	AATAACCATGCAA	CATGCAA	GGT	CCA	C	A	C>T	C>T_CCA	CG>TA_CATGCAA	7	FALSE	FALSE
186_v.txt	32165	32165-SNV-G-A	SNV	1	G	A	19	12564	0.151226	53.9474	rnr1D57N	FALSE	CAN	JSY14	5	rnr1D57N-Rep5	CGC	G>A	A/T+1	G/C-1	CG>TA	CG>TA	CAAAGCGCCAAAT	GCCAAAT	GCG	GCG	C	T	C>T	C>T_GCG	CG>TA_GCCAAAT	7	FALSE	FALSE
186_v.txt	32190	32190-SNV-G-A	SNV	1	G	A	14	12564	0.111429	48.1429	rnr1D57N	FALSE	CAN	JSY14	5	rnr1D57N-Rep5	TGC	G>A	A/T+1	G/C-1	CG>TA	CG>TA	AAAACTGCAATGT	GCAATGT	ACG	ACG	C	T	C>T	C>T_ACG	CG>TA_GCAATGT	7	FALSE	FALSE
186_v.txt	32271	32271-SNV-C-T	SNV	1	C	T	35	27652	0.126573	32.5143	rnr1D57N	FALSE	CAN	JSY14	5	rnr1D57N-Rep5	ACG	C>T	A/T+1	G/C-1	CG>TA	CG>TA	AAAATACGGGAAC	CGGGAAC	TGC	ACG	C	A	C>T	C>T_ACG	CG>TA_CGGGAAC	7	FALSE	FALSE
186_v.txt	32299	32299-SNV-C-T	SNV	1	C	T	37	27653	0.133801	50.5135	rnr1D57N	FALSE	CAN	JSY14	5	rnr1D57N-Rep5	GCG	C>T	A/T+1	G/C-1	CG>TA	CG>TA	AATTTGCGGCAGA	CGGCAGA	CGC	GCG	C	A	C>T	C>T_GCG	CG>TA_CGGCAGA	7	FALSE	FALSE
186_v.txt	32313	32313-SNV-G-A	SNV	1	G	A	71	27653	0.256753	59.0986	rnr1D57N	FALSE	CAN	JSY14	5	rnr1D57N-Rep5	GGT	G>A	A/T+1	G/C-1	CG>TA	CG>TA	ATAATGGTTGTTA	GTTGTTA	CCA	CCA	C	T	C>T	C>T_CCA	CG>TA_GTTGTTA	7	FALSE	FALSE
186_v.txt	32328	32328-SNV-G-A	SNV	1	G	A	1	27653	0.00362	63.9999	rnr1D57N	FALSE	CAN	JSY14	5	rnr1D57N-Rep5	AGC	G>A	A/T+1	G/C-1	CG>TA	CG>TA	ATAACAGCGTTGA	GCGTTGA	TCG	TCG	C	T	C>T	C>T_TCG	CG>TA_GCGTTGA	7	FALSE	FALSE
186_v.txt	32449	32449-SNV-C-T	SNV	1	C	T	31	27653	0.112104	46.0645	rnr1D57N	FALSE	CAN	JSY14	5	rnr1D57N-Rep5	CCA	C>T	A/T+1	G/C-1	CG>TA	CG>TA	AAAGTCCAATGAA	CAATGAA	GGT	CCA	C	A	C>T	C>T_CCA	CG>TA_CAATGAA	7	FALSE	FALSE
186_v.txt	32466	32466-SNV-C-T	SNV	1	C	T	34	27653	0.122952	45.1765	rnr1D57N	FALSE	CAN	JSY14	5	rnr1D57N-Rep5	GCC	C>T	A/T+1	G/C-1	CG>TA	CG>TA	AGAGAGCCAATGT	CCAATGT	CGG	GCC	C	A	C>T	C>T_GCC	CG>TA_CCAATGT	7	FALSE	FALSE
186_v.txt	32535	32535-SNV-G-A	SNV	1	G	A	30	27652	0.108491	35.2668	rnr1D57N	FALSE	CAN	JSY14	5	rnr1D57N-Rep5	TGC	G>A	A/T+1	G/C-1	CG>TA	CG>TA	GGGTTTGCAGCTT	GCAGCTT	ACG	ACG	C	T	C>T	C>T_ACG	CG>TA_GCAGCTT	7	FALSE	FALSE
186_v.txt	32536	32536-SNV-C-T	SNV	1	C	T	42	27652	0.151888	36.3567	rnr1D57N	FALSE	CAN	JSY14	5	rnr1D57N-Rep5	GCA	C>T	A/T+1	G/C-1	CG>TA	CG>TA	GGTTTGCAGCTTC	CAGCTTC	CGT	GCA	C	A	C>T	C>T_GCA	CG>TA_CAGCTTC	7	FALSE	FALSE
186_v.txt	32545	32545-SNV-C-T	SNV	1	C	T	26	27651	0.0940291	37.1923	rnr1D57N	FALSE	CAN	JSY14	5	rnr1D57N-Rep5	CCA	C>T	A/T+1	G/C-1	CG>TA	CG>TA	CTTCACCAGCAGT	CAGCAGT	GGT	CCA	C	A	C>T	C>T_CCA	CG>TA_CAGCAGT	7	FALSE	FALSE
186_v.txt	32590	32590-SNV-C-T	SNV	1	C	T	22	17176	0.128086	35.8636	rnr1D57N	FALSE	CAN	JSY14	5	rnr1D57N-Rep5	GCG	C>T	A/T+1	G/C-1	CG>TA	CG>TA	AGGCAGCGTTAAT	CGTTAAT	CGC	GCG	C	A	C>T	C>T_GCG	CG>TA_CGTTAAT	7	FALSE	FALSE
186_v.txt	32609	32609-SNV-C-T	SNV	1	C	T	29	17176	0.16884	48.7897	rnr1D57N	FALSE	CAN	JSY14	5	rnr1D57N-Rep5	CCC	C>T	A/T+1	G/C-1	CG>TA	CG>TA	GGAAACCCAACCT	CCAACCT	GGG	CCC	C	A	C>T	C>T_CCC	CG>TA_CCAACCT	7	FALSE	FALSE
186_v.txt	32610	32610-SNV-C-T	SNV	1	C	T	26	17176	0.151374	52.4167	rnr1D57N	FALSE	CAN	JSY14	5	rnr1D57N-Rep5	CCA	C>T	A/T+1	G/C-1	CG>TA	CG>TA	GAAACCCAACCTA	CAACCTA	GGT	CCA	C	A	C>T	C>T_CCA	CG>TA_CAACCTA	7	FALSE	FALSE
186_v.txt	32661	32661-SNV-C-T	SNV	1	C	T	516	17176	3.00419	59.0039	rnr1D57N	FALSE	CAN	JSY14	5	rnr1D57N-Rep5	CCA	C>T	A/T+1	G/C-1	CG>TA	CG>TA	GGACCCCAGGCAC	CAGGCAC	GGT	CCA	C	A	C>T	C>T_CCA	CG>TA_CAGGCAC	7	FALSE	FALSE
186_v.txt	32776	32776-SNV-C-T	SNV	1	C	T	22	17176	0.128086	48.1364	rnr1D57N	FALSE	CAN	JSY14	5	rnr1D57N-Rep5	GCG	C>T	A/T+1	G/C-1	CG>TA	CG>TA	TGGAAGCGACCCA	CGACCCA	CGC	GCG	C	A	C>T	C>T_GCG	CG>TA_CGACCCA	7	FALSE	FALSE
186_v.txt	32798	32798-SNV-G-A	SNV	1	G	A	26	17176	0.151374	43.6923	rnr1D57N	FALSE	CAN	JSY14	5	rnr1D57N-Rep5	CGT	G>A	A/T+1	G/C-1	CG>TA	CG>TA	TTCACCGTAATAT	GTAATAT	GCA	GCA	C	T	C>T	C>T_GCA	CG>TA_GTAATAT	7	FALSE	FALSE
186_v.txt	32900	32900-SNV-G-A	SNV	1	G	A	30	29334	0.10227	35.7983	rnr1D57N	FALSE	CAN	JSY14	5	rnr1D57N-Rep5	GGC	G>A	A/T+1	G/C-1	CG>TA	CG>TA	GACTTGGCCAACT	GCCAACT	CCG	CCG	C	T	C>T	C>T_CCG	CG>TA_GCCAACT	7	FALSE	FALSE
186_v.txt	32901	32901-SNV-C-T	SNV	1	C	T	48	29334	0.163633	32.1253	rnr1D57N	FALSE	CAN	JSY14	5	rnr1D57N-Rep5	GCC	C>T	A/T+1	G/C-1	CG>TA	CG>TA	ACTTGGCCAACTA	CCAACTA	CGG	GCC	C	A	C>T	C>T_GCC	CG>TA_CCAACTA	7	FALSE	FALSE
186_v.txt	32917	32917-SNV-C-T	SNV	1	C	T	54	29334	0.184087	44.6481	rnr1D57N	FALSE	CAN	JSY14	5	rnr1D57N-Rep5	TCC	C>T	A/T+1	G/C-1	CG>TA	CG>TA	TAAGTTCCAGGGC	CCAGGGC	AGG	TCC	C	A	C>T	C>T_TCC	CG>TA_CCAGGGC	7	FALSE	FALSE
186_v.txt	32935	32935-SNV-C-T	SNV	1	C	T	34	29334	0.115906	31.4118	rnr1D57N	FALSE	CAN	JSY14	5	rnr1D57N-Rep5	GCC	C>T	A/T+1	G/C-1	CG>TA	CG>TA	TGATTGCCCAAGA	CCCAAGA	CGG	GCC	C	A	C>T	C>T_GCC	CG>TA_CCCAAGA	7	FALSE	FALSE
186_v.txt	32945	32945-SNV-C-T	SNV	1	C	T	42	29334	0.143179	52.7592	rnr1D57N	FALSE	CAN	JSY14	5	rnr1D57N-Rep5	ACC	C>T	A/T+1	G/C-1	CG>TA	CG>TA	AGAAAACCAATAC	CCAATAC	TGG	ACC	C	A	C>T	C>T_ACC	CG>TA_CCAATAC	7	FALSE	FALSE
186_v.txt	32946	32946-SNV-C-T	SNV	1	C	T	62	29334	0.211359	57.0632	rnr1D57N	FALSE	CAN	JSY14	5	rnr1D57N-Rep5	CCA	C>T	A/T+1	G/C-1	CG>TA	CG>TA	GAAAACCAATACA	CAATACA	GGT	CCA	C	A	C>T	C>T_CCA	CG>TA_CAATACA	7	FALSE	FALSE
186_v.txt	32967	32967-SNV-G-A	SNV	1	G	A	65	29334	0.221586	57.4462	rnr1D57N	FALSE	CAN	JSY14	5	rnr1D57N-Rep5	CGC	G>A	A/T+1	G/C-1	CG>TA	CG>TA	TTGGCCGCACCAA	GCACCAA	GCG	GCG	C	T	C>T	C>T_GCG	CG>TA_GCACCAA	7	FALSE	FALSE
186_v.txt	32995	32995-SNV-G-A	SNV	1	G	A	24	29334	0.0818163	62.9167	rnr1D57N	FALSE	CAN	JSY14	5	rnr1D57N-Rep5	TGT	G>A	A/T+1	G/C-1	CG>TA	CG>TA	ATCTTTGTGAGAA	GTGAGAA	ACA	ACA	C	T	C>T	C>T_ACA	CG>TA_GTGAGAA	7	FALSE	FALSE
186_v.txt	33056	33056-SNV-C-T	SNV	1	C	T	28	29334	0.0954524	55.7857	rnr1D57N	FALSE	CAN	JSY14	5	rnr1D57N-Rep5	GCG	C>T	A/T+1	G/C-1	CG>TA	CG>TA	GGACTGCGTGACA	CGTGACA	CGC	GCG	C	A	C>T	C>T_GCG	CG>TA_CGTGACA	7	FALSE	FALSE
186_v.txt	33069	33069-SNV-G-A	SNV	1	G	A	24	29334	0.0818163	51.0001	rnr1D57N	FALSE	CAN	JSY14	5	rnr1D57N-Rep5	TGC	G>A	A/T+1	G/C-1	CG>TA	CG>TA	GAATATGCCAAAG	GCCAAAG	ACG	ACG	C	T	C>T	C>T_ACG	CG>TA_GCCAAAG	7	FALSE	FALSE
186_v.txt	33070	33070-SNV-C-T	SNV	1	C	T	35	29333	0.11932	53.3137	rnr1D57N	FALSE	CAN	JSY14	5	rnr1D57N-Rep5	GCC	C>T	A/T+1	G/C-1	CG>TA	CG>TA	AATATGCCAAAGA	CCAAAGA	CGG	GCC	C	A	C>T	C>T_GCC	CG>TA_CCAAAGA	7	FALSE	FALSE
186_v.txt	33114	33114-SNV-C-T	SNV	1	C	T	26	29334	0.0886343	42.3449	rnr1D57N	FALSE	CAN	JSY14	5	rnr1D57N-Rep5	GCC	C>T	A/T+1	G/C-1	CG>TA	CG>TA	ACTGGGCCGGCGT	CCGGCGT	CGG	GCC	C	A	C>T	C>T_GCC	CG>TA_CCGGCGT	7	FALSE	FALSE
186_v.txt	33115	33115-SNV-C-T	SNV	1	C	T	11	29334	0.0374991	37.1818	rnr1D57N	FALSE	CAN	JSY14	5	rnr1D57N-Rep5	CCG	C>T	A/T+1	G/C-1	CG>TA	CG>TA	CTGGGCCGGCGTT	CGGCGTT	GGC	CCG	C	A	C>T	C>T_CCG	CG>TA_CGGCGTT	7	FALSE	FALSE
186_v.txt	33118	33118-SNV-C-T	SNV	1	C	T	30	29334	0.10227	41.5667	rnr1D57N	FALSE	CAN	JSY14	5	rnr1D57N-Rep5	GCG	C>T	A/T+1	G/C-1	CG>TA	CG>TA	GGCCGGCGTTGGT	CGTTGGT	CGC	GCG	C	A	C>T	C>T_GCG	CG>TA_CGTTGGT	7	FALSE	FALSE
186_v.txt	33154	33154-SNV-C-T	SNV	1	C	T	373	29334	1.27156	37.2601	rnr1D57N	FALSE	CAN	JSY14	5	rnr1D57N-Rep5	CCT	C>T	A/T+1	G/C-1	CG>TA	CG>TA	AAAGACCTGTACC	CTGTACC	GGA	CCT	C	A	C>T	C>T_CCT	CG>TA_CTGTACC	7	FALSE	FALSE
186_v.txt	33276	33276-SNV-G-A	SNV	1	G	A	49	21090	0.232338	46.0816	rnr1D57N	FALSE	CAN	JSY14	5	rnr1D57N-Rep5	CGT	G>A	A/T+1	G/C-1	CG>TA	CG>TA	GAGAACGTATCCT	GTATCCT	GCA	GCA	C	T	C>T	C>T_GCA	CG>TA_GTATCCT	7	FALSE	FALSE
186_v.txt	33284	33284-SNV-G-A	SNV	1	G	A	25	21090	0.11854	43.84	rnr1D57N	FALSE	CAN	JSY14	5	rnr1D57N-Rep5	CGC	G>A	A/T+1	G/C-1	CG>TA	CG>TA	ATCCTCGCCATTT	GCCATTT	GCG	GCG	C	T	C>T	C>T_GCG	CG>TA_GCCATTT	7	FALSE	FALSE
186_v.txt	33310	33310-SNV-G-A	SNV	1	G	A	33	21090	0.156472	52.7273	rnr1D57N	FALSE	CAN	JSY14	5	rnr1D57N-Rep5	CGC	G>A	A/T+1	G/C-1	CG>TA	CG>TA	AAGAGCGCAATGG	GCAATGG	GCG	GCG	C	T	C>T	C>T_GCG	CG>TA_GCAATGG	7	FALSE	FALSE
186_v.txt	33376	33376-SNV-G-A	SNV	1	G	A	41	21090	0.194405	51.1707	rnr1D57N	FALSE	CAN	JSY14	5	rnr1D57N-Rep5	TGT	G>A	A/T+1	G/C-1	CG>TA	CG>TA	GTGTTTGTGAAGC	GTGAAGC	ACA	ACA	C	T	C>T	C>T_ACA	CG>TA_GTGAAGC	7	FALSE	FALSE
186_v.txt	33412	33412-SNV-G-A	SNV	1	G	A	22	21090	0.104315	51.0909	rnr1D57N	FALSE	CAN	JSY14	5	rnr1D57N-Rep5	GGC	G>A	A/T+1	G/C-1	CG>TA	CG>TA	TGACCGGCTCATT	GCTCATT	CCG	CCG	C	T	C>T	C>T_CCG	CG>TA_GCTCATT	7	FALSE	FALSE
186_v.txt	33474	33474-SNV-C-T	SNV	1	C	T	45	21089	0.213381	32.0444	rnr1D57N	FALSE	CAN	JSY14	5	rnr1D57N-Rep5	GCC	C>T	A/T+1	G/C-1	CG>TA	CG>TA	GCTATGCCTTTTT	CCTTTTT	CGG	GCC	C	A	C>T	C>T_GCC	CG>TA_CCTTTTT	7	FALSE	FALSE
186_v.txt	31947	31947-SNV-G-C	SNV	1	G	C	5	12555	0.0398248	38	rnr1D57N	FALSE	CAN	JSY14	5	rnr1D57N-Rep5	CGT	G>C	G/C+1	G/C-1	CG>GC	CG>GC	ATGATCGTCATAA	GTCATAA	GCA	GCA	C	G	C>G	C>G_GCA	CG>GC_GTCATAA	7	FALSE	FALSE
186_v.txt	32057	32057-SNV-C-G	SNV	1	C	G	11	12564	0.0875517	58.9091	rnr1D57N	FALSE	CAN	JSY14	5	rnr1D57N-Rep5	GCG	C>G	G/C+1	G/C-1	CG>GC	CG>GC	GATGTGCGAGATT	CGAGATT	CGC	GCG	C	C	C>G	C>G_GCG	CG>GC_CGAGATT	7	FALSE	FALSE
186_v.txt	32064	32064-SNV-G-C	SNV	1	G	C	7	12564	0.0557147	62	rnr1D57N	FALSE	CAN	JSY14	5	rnr1D57N-Rep5	TGA	G>C	G/C+1	G/C-1	CG>GC	CG>GC	GAGATTGAGATAA	GAGATAA	ACT	ACT	C	G	C>G	C>G_ACT	CG>GC_GAGATAA	7	FALSE	FALSE
186_v.txt	32271	32271-SNV-C-G	SNV	1	C	G	63	27652	0.227832	35.5397	rnr1D57N	FALSE	CAN	JSY14	5	rnr1D57N-Rep5	ACG	C>G	G/C+1	G/C-1	CG>GC	CG>GC	AAAATACGGGAAC	CGGGAAC	TGC	ACG	C	C	C>G	C>G_ACG	CG>GC_CGGGAAC	7	FALSE	FALSE
186_v.txt	32328	32328-SNV-G-C	SNV	1	G	C	1	27653	0.00362	25.9988	rnr1D57N	FALSE	CAN	JSY14	5	rnr1D57N-Rep5	AGC	G>C	G/C+1	G/C-1	CG>GC	CG>GC	ATAACAGCGTTGA	GCGTTGA	TCG	TCG	C	G	C>G	C>G_TCG	CG>GC_GCGTTGA	7	FALSE	FALSE
186_v.txt	32399	32399-SNV-G-C	SNV	1	G	C	18	27653	0.0650924	53.5556	rnr1D57N	FALSE	CAN	JSY14	5	rnr1D57N-Rep5	CGT	G>C	G/C+1	G/C-1	CG>GC	CG>GC	AGAAACGTAGGAA	GTAGGAA	GCA	GCA	C	G	C>G	C>G_GCA	CG>GC_GTAGGAA	7	FALSE	FALSE
186_v.txt	32829	32829-SNV-G-C	SNV	1	G	C	7	17176	0.0407545	42.8571	rnr1D57N	FALSE	CAN	JSY14	5	rnr1D57N-Rep5	TGT	G>C	G/C+1	G/C-1	CG>GC	CG>GC	ATTATTGTGATAA	GTGATAA	ACA	ACA	C	G	C>G	C>G_ACA	CG>GC_GTGATAA	7	FALSE	FALSE
186_v.txt	32876	32876-SNV-G-C	SNV	1	G	C	46	29318	0.1569	37.7174	rnr1D57N	FALSE	CAN	JSY14	5	rnr1D57N-Rep5	TGT	G>C	G/C+1	G/C-1	CG>GC	CG>GC	AACTTTGTACGTC	GTACGTC	ACA	ACA	C	G	C>G	C>G_ACA	CG>GC_GTACGTC	7	FALSE	FALSE
186_v.txt	32901	32901-SNV-C-G	SNV	1	C	G	5	29334	0.0170451	29.0016	rnr1D57N	FALSE	CAN	JSY14	5	rnr1D57N-Rep5	GCC	C>G	G/C+1	G/C-1	CG>GC	CG>GC	ACTTGGCCAACTA	CCAACTA	CGG	GCC	C	C	C>G	C>G_GCC	CG>GC_CCAACTA	7	FALSE	FALSE
186_v.txt	33070	33070-SNV-C-G	SNV	1	C	G	9	29333	0.0306822	52.6653	rnr1D57N	FALSE	CAN	JSY14	5	rnr1D57N-Rep5	GCC	C>G	G/C+1	G/C-1	CG>GC	CG>GC	AATATGCCAAAGA	CCAAAGA	CGG	GCC	C	C	C>G	C>G_GCC	CG>GC_CCAAAGA	7	FALSE	FALSE
186_v.txt	33114	33114-SNV-C-G	SNV	1	C	G	1	29334	0.00341	30.9999	rnr1D57N	FALSE	CAN	JSY14	5	rnr1D57N-Rep5	GCC	C>G	G/C+1	G/C-1	CG>GC	CG>GC	ACTGGGCCGGCGT	CCGGCGT	CGG	GCC	C	C	C>G	C>G_GCC	CG>GC_CCGGCGT	7	FALSE	FALSE
186_v.txt	33115	33115-SNV-C-G	SNV	1	C	G	9	29334	0.0306811	45.5557	rnr1D57N	FALSE	CAN	JSY14	5	rnr1D57N-Rep5	CCG	C>G	G/C+1	G/C-1	CG>GC	CG>GC	CTGGGCCGGCGTT	CGGCGTT	GGC	CCG	C	C	C>G	C>G_CCG	CG>GC_CGGCGTT	7	FALSE	FALSE
186_v.txt	33118	33118-SNV-C-G	SNV	1	C	G	4	29334	0.0136361	42.5	rnr1D57N	FALSE	CAN	JSY14	5	rnr1D57N-Rep5	GCG	C>G	G/C+1	G/C-1	CG>GC	CG>GC	GGCCGGCGTTGGT	CGTTGGT	CGC	GCG	C	C	C>G	C>G_GCG	CG>GC_CGTTGGT	7	FALSE	FALSE
186_v.txt	33154	33154-SNV-C-G	SNV	1	C	G	4	29334	0.0136361	38	rnr1D57N	FALSE	CAN	JSY14	5	rnr1D57N-Rep5	CCT	C>G	G/C+1	G/C-1	CG>GC	CG>GC	AAAGACCTGTACC	CTGTACC	GGA	CCT	C	C	C>G	C>G_CCT	CG>GC_CTGTACC	7	FALSE	FALSE
186_v.txt	33284	33284-SNV-G-C	SNV	1	G	C	10	21090	0.0474158	55.4	rnr1D57N	FALSE	CAN	JSY14	5	rnr1D57N-Rep5	CGC	G>C	G/C+1	G/C-1	CG>GC	CG>GC	ATCCTCGCCATTT	GCCATTT	GCG	GCG	C	G	C>G	C>G_GCG	CG>GC_GCCATTT	7	FALSE	FALSE
186_v.txt	31657	31657-SNV-G-T	SNV	1	G	T	33	3690	0.894309	20.6061	rnr1D57N	FALSE	CAN	JSY14	5	rnr1D57N-Rep5	GGC	G>T	A/T+1	G/C-1	CG>AT	CG>AT	GAAATGGCGTGGA	GCGTGGA	CCG	CCG	C	A	C>A	C>A_CCG	CG>AT_GCGTGGA	7	FALSE	FALSE
186_v.txt	31980	31980-SNV-G-T	SNV	1	G	T	13	12564	0.10347	37.3077	rnr1D57N	FALSE	CAN	JSY14	5	rnr1D57N-Rep5	GGG	G>T	A/T+1	G/C-1	CG>AT	CG>AT	AAGCCGGGCATTA	GGCATTA	CCC	CCC	C	A	C>A	C>A_CCC	CG>AT_GGCATTA	7	FALSE	FALSE
186_v.txt	32008	32008-SNV-C-A	SNV	1	C	A	1835	12564	14.6052	56.6599	rnr1D57N	FALSE	CAN	JSY14	5	rnr1D57N-Rep5	TCG	C>A	A/T+1	G/C-1	CG>AT	CG>AT	GTAACTCGTCACG	CGTCACG	AGC	TCG	C	T	C>A	C>A_TCG	CG>AT_CGTCACG	7	FALSE	FALSE
186_v.txt	32027	32027-SNV-G-T	SNV	1	G	T	15	12564	0.119389	44	rnr1D57N	FALSE	CAN	JSY14	5	rnr1D57N-Rep5	GGT	G>T	A/T+1	G/C-1	CG>AT	CG>AT	GCCACGGTATTTC	GTATTTC	CCA	CCA	C	A	C>A	C>A_CCA	CG>AT_GTATTTC	7	FALSE	FALSE
186_v.txt	32054	32054-SNV-G-T	SNV	1	G	T	12	12564	0.095511	48.0833	rnr1D57N	FALSE	CAN	JSY14	5	rnr1D57N-Rep5	TGT	G>T	A/T+1	G/C-1	CG>AT	CG>AT	TCTGATGTGCGAG	GTGCGAG	ACA	ACA	C	A	C>A	C>A_ACA	CG>AT_GTGCGAG	7	FALSE	FALSE
186_v.txt	32119	32119-SNV-C-A	SNV	1	C	A	14	12564	0.111429	60.2143	rnr1D57N	FALSE	CAN	JSY14	5	rnr1D57N-Rep5	TCG	C>A	A/T+1	G/C-1	CG>AT	CG>AT	GCCATTCGAAAAC	CGAAAAC	AGC	TCG	C	T	C>A	C>A_TCG	CG>AT_CGAAAAC	7	FALSE	FALSE
186_v.txt	32149	32149-SNV-C-A	SNV	1	C	A	14	12564	0.111429	42	rnr1D57N	FALSE	CAN	JSY14	5	rnr1D57N-Rep5	TCC	C>A	A/T+1	G/C-1	CG>AT	CG>AT	ATGTCTCCATGTA	CCATGTA	AGG	TCC	C	T	C>A	C>A_TCC	CG>AT_CCATGTA	7	FALSE	FALSE
186_v.txt	32220	32220-SNV-C-A	SNV	1	C	A	2	12564	0.0159185	51.003	rnr1D57N	FALSE	CAN	JSY14	5	rnr1D57N-Rep5	CCT	C>A	A/T+1	G/C-1	CG>AT	CG>AT	GTGGTCCTTGACA	CTTGACA	GGA	CCT	C	T	C>A	C>A_CCT	CG>AT_CTTGACA	7	FALSE	FALSE
186_v.txt	32274	32274-SNV-G-T	SNV	1	G	T	330	27652	1.1934	36.0333	rnr1D57N	FALSE	CAN	JSY14	5	rnr1D57N-Rep5	GGA	G>T	A/T+1	G/C-1	CG>AT	CG>AT	ATACGGGAACCAA	GAACCAA	CCT	CCT	C	A	C>A	C>A_CCT	CG>AT_GAACCAA	7	FALSE	FALSE
186_v.txt	32329	32329-SNV-C-A	SNV	1	C	A	13	27653	0.0470112	23.9237	rnr1D57N	FALSE	CAN	JSY14	5	rnr1D57N-Rep5	GCG	C>A	A/T+1	G/C-1	CG>AT	CG>AT	TAACAGCGTTGAA	CGTTGAA	CGC	GCG	C	T	C>A	C>A_GCG	CG>AT_CGTTGAA	7	FALSE	FALSE
186_v.txt	32399	32399-SNV-G-T	SNV	1	G	T	23	27653	0.0831736	55.6957	rnr1D57N	FALSE	CAN	JSY14	5	rnr1D57N-Rep5	CGT	G>T	A/T+1	G/C-1	CG>AT	CG>AT	AGAAACGTAGGAA	GTAGGAA	GCA	GCA	C	A	C>A	C>A_GCA	CG>AT_GTAGGAA	7	FALSE	FALSE
186_v.txt	32471	32471-SNV-G-T	SNV	1	G	T	16	27653	0.0578599	52.1875	rnr1D57N	FALSE	CAN	JSY14	5	rnr1D57N-Rep5	TGT	G>T	A/T+1	G/C-1	CG>AT	CG>AT	GCCAATGTAGAAG	GTAGAAG	ACA	ACA	C	A	C>A	C>A_ACA	CG>AT_GTAGAAG	7	FALSE	FALSE
186_v.txt	32474	32474-SNV-G-T	SNV	1	G	T	54	27653	0.195277	47.0741	rnr1D57N	FALSE	CAN	JSY14	5	rnr1D57N-Rep5	AGA	G>T	A/T+1	G/C-1	CG>AT	CG>AT	AATGTAGAAGGTT	GAAGGTT	TCT	TCT	C	A	C>A	C>A_TCT	CG>AT_GAAGGTT	7	FALSE	FALSE
186_v.txt	32566	32566-SNV-C-A	SNV	1	C	A	21	17170	0.122306	35.1429	rnr1D57N	FALSE	CAN	JSY14	5	rnr1D57N-Rep5	TCA	C>A	A/T+1	G/C-1	CG>AT	CG>AT	CTAGTTCAGTACC	CAGTACC	AGT	TCA	C	T	C>A	C>A_TCA	CG>AT_CAGTACC	7	FALSE	FALSE
186_v.txt	32575	32575-SNV-G-T	SNV	1	G	T	190	17177	1.10613	36.7684	rnr1D57N	FALSE	CAN	JSY14	5	rnr1D57N-Rep5	TGA	G>T	A/T+1	G/C-1	CG>AT	CG>AT	TACCTTGAAATGT	GAAATGT	ACT	ACT	C	A	C>A	C>A_ACT	CG>AT_GAAATGT	7	FALSE	FALSE
186_v.txt	32783	32783-SNV-G-T	SNV	1	G	T	17	17176	0.0989753	41.5882	rnr1D57N	FALSE	CAN	JSY14	5	rnr1D57N-Rep5	AGA	G>T	A/T+1	G/C-1	CG>AT	CG>AT	GACCCAGAACTCG	GAACTCG	TCT	TCT	C	A	C>A	C>A_TCT	CG>AT_GAACTCG	7	FALSE	FALSE
186_v.txt	32917	32917-SNV-C-A	SNV	1	C	A	11	29334	0.0374991	42	rnr1D57N	FALSE	CAN	JSY14	5	rnr1D57N-Rep5	TCC	C>A	A/T+1	G/C-1	CG>AT	CG>AT	TAAGTTCCAGGGC	CCAGGGC	AGG	TCC	C	T	C>A	C>A_TCC	CG>AT_CCAGGGC	7	FALSE	FALSE
186_v.txt	32937	32937-SNV-C-A	SNV	1	C	A	47	29334	0.160224	49.6924	rnr1D57N	FALSE	CAN	JSY14	5	rnr1D57N-Rep5	CCA	C>A	A/T+1	G/C-1	CG>AT	CG>AT	ATTGCCCAAGAAA	CAAGAAA	GGT	CCA	C	T	C>A	C>A_CCA	CG>AT_CAAGAAA	7	FALSE	FALSE
186_v.txt	33015	33015-SNV-G-T	SNV	1	G	T	21	29334	0.0715893	57.8095	rnr1D57N	FALSE	CAN	JSY14	5	rnr1D57N-Rep5	GGA	G>T	A/T+1	G/C-1	CG>AT	CG>AT	AAAGAGGATGTAA	GATGTAA	CCT	CCT	C	A	C>A	C>A_CCT	CG>AT_GATGTAA	7	FALSE	FALSE
186_v.txt	33024	33024-SNV-G-T	SNV	1	G	T	26	29334	0.0886343	62.4615	rnr1D57N	FALSE	CAN	JSY14	5	rnr1D57N-Rep5	AGG	G>T	A/T+1	G/C-1	CG>AT	CG>AT	GTAACAGGGATGA	GGGATGA	TCC	TCC	C	A	C>A	C>A_TCC	CG>AT_GGGATGA	7	FALSE	FALSE
186_v.txt	33154	33154-SNV-C-A	SNV	1	C	A	22	29334	0.0749983	35.3636	rnr1D57N	FALSE	CAN	JSY14	5	rnr1D57N-Rep5	CCT	C>A	A/T+1	G/C-1	CG>AT	CG>AT	AAAGACCTGTACC	CTGTACC	GGA	CCT	C	T	C>A	C>A_CCT	CG>AT_CTGTACC	7	FALSE	FALSE
186_v.txt	33156	33156-SNV-G-T	SNV	1	G	T	29	29334	0.0988614	36.5862	rnr1D57N	FALSE	CAN	JSY14	5	rnr1D57N-Rep5	TGT	G>T	A/T+1	G/C-1	CG>AT	CG>AT	AGACCTGTACCAA	GTACCAA	ACA	ACA	C	A	C>A	C>A_ACA	CG>AT_GTACCAA	7	FALSE	FALSE
186_v.txt	33175	33175-SNV-G-T	SNV	1	G	T	10	29326	0.0340994	37.9	rnr1D57N	FALSE	CAN	JSY14	5	rnr1D57N-Rep5	AGG	G>T	A/T+1	G/C-1	CG>AT	CG>AT	CACCAAGGGCAAT	GGGCAAT	TCC	TCC	C	A	C>A	C>A_TCC	CG>AT_GGGCAAT	7	FALSE	FALSE
186_v.txt	33195	33195-SNV-C-A	SNV	1	C	A	75	21090	0.355619	35.48	rnr1D57N	FALSE	CAN	JSY14	5	rnr1D57N-Rep5	TCT	C>A	A/T+1	G/C-1	CG>AT	CG>AT	ATATGTCTTTGCT	CTTTGCT	AGA	TCT	C	T	C>A	C>A_TCT	CG>AT_CTTTGCT	7	FALSE	FALSE
186_v.txt	33325	33325-SNV-C-A	SNV	1	C	A	89	21090	0.422001	57.1348	rnr1D57N	FALSE	CAN	JSY14	5	rnr1D57N-Rep5	TCT	C>A	A/T+1	G/C-1	CG>AT	CG>AT	ACAATTCTTTACT	CTTTACT	AGA	TCT	C	T	C>A	C>A_TCT	CG>AT_CTTTACT	7	FALSE	FALSE
186_v.txt	33474	33474-SNV-C-A	SNV	1	C	A	81	21089	0.384086	34.3951	rnr1D57N	FALSE	CAN	JSY14	5	rnr1D57N-Rep5	GCC	C>A	A/T+1	G/C-1	CG>AT	CG>AT	GCTATGCCTTTTT	CCTTTTT	CGG	GCC	C	T	C>A	C>A_GCC	CG>AT_CCTTTTT	7	FALSE	FALSE
186_v.txt	33475	33475-SNV-C-A	SNV	1	C	A	35	21089	0.165963	35.3152	rnr1D57N	FALSE	CAN	JSY14	5	rnr1D57N-Rep5	CCT	C>A	A/T+1	G/C-1	CG>AT	CG>AT	CTATGCCTTTTTT	CTTTTTT	GGA	CCT	C	T	C>A	C>A_CCT	CG>AT_CTTTTTT	7	FALSE	FALSE
186_v.txt	32328	32328-MNV-GC-CG	MNV	2	GC	CG	21	27653	0.0759411	56.9048	rnr1D57N	FALSE	CAN	JSY14	5	rnr1D57N-Rep5	AGC	nope	>1bp-ins	>1bpdel	none	MNV	ATAACAGCGTTGA	GCGTTGA	TCG	AGC	GC	none	NA	NA_AGC	MNV_GCGTTGA	7	FALSE	FALSE
186_v.txt	33114	33114-MNV-CC-AA	MNV	2	CC	AA	2	29334	0.00682	37.7502	rnr1D57N	FALSE	CAN	JSY14	5	rnr1D57N-Rep5	GCC	nope	>1bp-ins	>1bpdel	none	MNV	ACTGGGCCGGCGT	CCGGCGT	CGG	GCC	CC	none	NA	NA_GCC	MNV_CCGGCGT	7	FALSE	FALSE
186_v.txt	31926	31926-Insertion---C	Insertion	1	-	C	2	3690	0.0542005	38	rnr1D57N	FALSE	CAN	JSY14	5	rnr1D57N-Rep5	ACC	nope	G/C+1	>1bpdel	none	G/C+1	GTGAAACCTTGAA	CCTTGAA	TGG	ACC	-	G	NA	NA_ACC	G/C+1_CCTTGAA	7	FALSE	FALSE
186_v.txt	32081	32081-Insertion---A	Insertion	1	-	A	36	12564	0.286533	63.6944	rnr1D57N	FALSE	CAN	JSY14	5	rnr1D57N-Rep5	CAA	nope	A/T+1	>1bpdel	none	A/T+1	CCATGCAAAAAAG	AAAAAAG	GTT	CAA	-	T	NA	NA_CAA	A/T+1_AAAAAAG	7	FALSE	FALSE
186_v.txt	32168	32168-Insertion---A	Insertion	1	-	A	4	12564	0.031837	51	rnr1D57N	FALSE	CAN	JSY14	5	rnr1D57N-Rep5	CAA	nope	A/T+1	>1bpdel	none	A/T+1	AGCGCCAAATGCA	AAATGCA	GTT	CAA	-	T	NA	NA_CAA	A/T+1_AAATGCA	7	FALSE	FALSE
186_v.txt	32295	32295-Insertion---T	Insertion	1	-	T	128	27653	0.462879	50.3438	rnr1D57N	FALSE	CAN	JSY14	5	rnr1D57N-Rep5	ATT	nope	A/T+1	>1bpdel	none	A/T+1	TTTGAATTTGCGG	TTTGCGG	TAA	ATT	-	A	NA	NA_ATT	A/T+1_TTTGCGG	7	FALSE	FALSE
186_v.txt	32402	32402-Insertion---GGAAGTAGATTGTGTTAGTTTAGGGTCATTGTAT	Insertion	34	-	GGAAGTAGATTGTGTTAGTTTAGGGTCATTGTAT	7	27653	0.0253137	58.6723	rnr1D57N	FALSE	CAN	JSY14	5	rnr1D57N-Rep5	AGG	nope	>1bp-ins	>1bpdel	none	>1bp-ins	AACGTAGGAAGTA	GGAAGTA	TCC	AGG	-	none	NA	NA_AGG	>1bp-ins_GGAAGTA	7	FALSE	FALSE
186_v.txt	32448	32448-Insertion---CCAATGAATAAAAGAGAG	Insertion	18	-	CCAATGAATAAAAGAGAG	1	27653	0.00362	60.8333	rnr1D57N	FALSE	CAN	JSY14	5	rnr1D57N-Rep5	TCC	nope	>1bp-ins	>1bpdel	none	>1bp-ins	AAAAGTCCAATGA	CCAATGA	AGG	TCC	-	none	NA	NA_TCC	>1bp-ins_CCAATGA	7	FALSE	FALSE
186_v.txt	32448	32448-Insertion---CCAATGAATAATAGAGAG	Insertion	18	-	CCAATGAATAATAGAGAG	432	27653	1.56222	53.3337	rnr1D57N	FALSE	CAN	JSY14	5	rnr1D57N-Rep5	TCC	nope	>1bp-ins	>1bpdel	none	>1bp-ins	AAAAGTCCAATGA	CCAATGA	AGG	TCC	-	none	NA	NA_TCC	>1bp-ins_CCAATGA	7	FALSE	FALSE
186_v.txt	32448	32448-Insertion---CCAATGTATAATAGAGAG	Insertion	18	-	CCAATGTATAATAGAGAG	2	27653	0.00723	48.75	rnr1D57N	FALSE	CAN	JSY14	5	rnr1D57N-Rep5	TCC	nope	>1bp-ins	>1bpdel	none	>1bp-ins	AAAAGTCCAATGA	CCAATGA	AGG	TCC	-	none	NA	NA_TCC	>1bp-ins_CCAATGA	7	FALSE	FALSE
186_v.txt	32448	32448-Insertion---GAATAATAGAGAG	Insertion	13	-	GAATAATAGAGAG	1	27653	0.00362	37.9231	rnr1D57N	FALSE	CAN	JSY14	5	rnr1D57N-Rep5	TCC	nope	>1bp-ins	>1bpdel	none	>1bp-ins	AAAAGTCCAATGA	CCAATGA	AGG	TCC	-	none	NA	NA_TCC	>1bp-ins_CCAATGA	7	FALSE	FALSE
186_v.txt	32454	32454-Insertion---AATAATAGAGAGCCAATA	Insertion	18	-	AATAATAGAGAGCCAATA	1	27653	0.00362	63.3889	rnr1D57N	FALSE	CAN	JSY14	5	rnr1D57N-Rep5	GAA	nope	>1bp-ins	>1bpdel	none	>1bp-ins	CCAATGAATAATA	AATAATA	CTT	GAA	-	none	NA	NA_GAA	>1bp-ins_AATAATA	7	FALSE	FALSE
186_v.txt	32498	32498-Insertion---T	Insertion	1	-	T	23	27653	0.0831736	46.8261	rnr1D57N	FALSE	CAN	JSY14	5	rnr1D57N-Rep5	CTT	nope	A/T+1	>1bpdel	none	A/T+1	AACAACTTTTTTG	TTTTTTG	GAA	CTT	-	A	NA	NA_CTT	A/T+1_TTTTTTG	7	FALSE	FALSE
186_v.txt	32593	32593-Insertion---A	Insertion	1	-	A	4	17176	0.0232883	50.25	rnr1D57N	FALSE	CAN	JSY14	5	rnr1D57N-Rep5	TTA	nope	A/T+1	>1bpdel	none	A/T+1	CAGCGTTAATCAA	TAATCAA	AAT	TTA	-	T	NA	NA_TTA	A/T+1_TAATCAA	7	FALSE	FALSE
186_v.txt	32728	32728-Insertion---A	Insertion	1	-	A	6	17176	0.0349325	57.3333	rnr1D57N	FALSE	CAN	JSY14	5	rnr1D57N-Rep5	CAA	nope	A/T+1	>1bpdel	none	A/T+1	CCATACAAAAACA	AAAAACA	GTT	CAA	-	T	NA	NA_CAA	A/T+1_AAAAACA	7	FALSE	FALSE
186_v.txt	32839	32839-Insertion---C	Insertion	1	-	C	2	17176	0.0116442	38	rnr1D57N	FALSE	CAN	JSY14	5	rnr1D57N-Rep5	ACC	nope	G/C+1	>1bpdel	none	G/C+1	TAATTACCCAAAA	CCCAAAA	TGG	ACC	-	G	NA	NA_ACC	G/C+1_CCCAAAA	7	FALSE	FALSE
186_v.txt	32842	32842-Insertion---A	Insertion	1	-	A	34	17176	0.197951	46.3235	rnr1D57N	FALSE	CAN	JSY14	5	rnr1D57N-Rep5	CAA	nope	A/T+1	>1bpdel	none	A/T+1	TTACCCAAAAAAT	AAAAAAT	GTT	CAA	-	T	NA	NA_CAA	A/T+1_AAAAAAT	7	FALSE	FALSE
186_v.txt	33036	33036-Insertion---GCCATTTCACCCAAGGACTGCGTGACAGAATAT	Insertion	33	-	GCCATTTCACCCAAGGACTGCGTGACAGAATAT	4	29334	0.0136361	61.0303	rnr1D57N	FALSE	CAN	JSY14	5	rnr1D57N-Rep5	AGC	nope	>1bp-ins	>1bpdel	none	>1bp-ins	AATGTAGCCATTT	GCCATTT	TCG	AGC	-	none	NA	NA_AGC	>1bp-ins_GCCATTT	7	FALSE	FALSE
186_v.txt	33219	33219-Insertion---C	Insertion	1	-	C	7	21090	0.0331911	37.4286	rnr1D57N	FALSE	CAN	JSY14	5	rnr1D57N-Rep5	TTC	nope	G/C+1	>1bpdel	none	G/C+1	TTCACTTCAGCGT	TCAGCGT	AAG	TTC	-	G	NA	NA_TTC	G/C+1_TCAGCGT	7	FALSE	FALSE
186_v.txt	33265	33265-Insertion---CCATAGAGAACGTATCCTCGCCA	Insertion	23	-	CCATAGAGAACGTATCCTCGCCA	4	21090	0.0189663	44.8261	rnr1D57N	FALSE	CAN	JSY14	5	rnr1D57N-Rep5	TCC	nope	>1bp-ins	>1bpdel	none	>1bp-ins	CATCCTCCATAGA	CCATAGA	AGG	TCC	-	none	NA	NA_TCC	>1bp-ins_CCATAGA	7	FALSE	FALSE
186_v.txt	33288	33288-Insertion---T	Insertion	1	-	T	9	21090	0.0426743	54.1111	rnr1D57N	FALSE	CAN	JSY14	5	rnr1D57N-Rep5	ATT	nope	A/T+1	>1bpdel	none	A/T+1	TCGCCATTTACTC	TTTACTC	TAA	ATT	-	A	NA	NA_ATT	A/T+1_TTTACTC	7	FALSE	FALSE
186_v.txt	32215	32215-Deletion-TGGTCC--	Deletion	6	TGGTCC	-	21	12564	0.167144	41.2857	rnr1D57N	FALSE	CAN	JSY14	5	rnr1D57N-Rep5	GTG	nope	>1bp-ins	>1bpdel	none	>1bpdel	CTTTGGTGGTCCT	TGGTCCT	CAC	GTG	TGGTCC	none	NA	NA_GTG	>1bpdel_TGGTCCT	7	FALSE	FALSE
186_v.txt	32454	32454-Deletion-AAT--	Deletion	3	AAT	-	7	27653	0.0253137	56.5714	rnr1D57N	FALSE	CAN	JSY14	5	rnr1D57N-Rep5	GAA	nope	>1bp-ins	>1bpdel	none	>1bpdel	CCAATGAATAATA	AATAATA	CTT	GAA	AAT	none	NA	NA_GAA	>1bpdel_AATAATA	7	FALSE	FALSE
186_v.txt	32736	32736-Deletion-TA--	Deletion	2	TA	-	7	17176	0.0407545	60	rnr1D57N	FALSE	CAN	JSY14	5	rnr1D57N-Rep5	GTA	nope	>1bp-ins	>1bpdel	none	>1bpdel	AAACAGTATATTA	TATATTA	CAT	GTA	TA	none	NA	NA_GTA	>1bpdel_TATATTA	7	FALSE	FALSE
186_v.txt	33474	33474-Deletion-CC--	Deletion	2	CC	-	2	21089	0.00948	16	rnr1D57N	FALSE	CAN	JSY14	5	rnr1D57N-Rep5	GCC	nope	>1bp-ins	>1bpdel	none	>1bpdel	GCTATGCCTTTTT	CCTTTTT	CGG	GCC	CC	none	NA	NA_GCC	>1bpdel_CCTTTTT	7	FALSE	FALSE
186_v.txt	31723	31723-Deletion-A--	Deletion	1	A	-	6	3690	0.162602	63.5	rnr1D57N	FALSE	CAN	JSY14	5	rnr1D57N-Rep5	CAA	nope	>1bp-ins	A/T-1	none	A/T-1	TGTCCCAAAAAGT	AAAAAGT	GTT	GTT	T	none	T>none	T>none_GTT	A/T-1_AAAAAGT	7	FALSE	FALSE
186_v.txt	31861	31861-Deletion-G--	Deletion	1	G	-	5	3690	0.135501	48.4	rnr1D57N	FALSE	CAN	JSY14	5	rnr1D57N-Rep5	AGG	nope	>1bp-ins	G/C-1	none	G/C-1	AGAACAGGAAAAT	GGAAAAT	TCC	TCC	C	none	C>none	C>none_TCC	G/C-1_GGAAAAT	7	FALSE	FALSE
186_v.txt	31958	31958-Deletion-G--	Deletion	1	G	-	42	12564	0.334288	36.6429	rnr1D57N	FALSE	CAN	JSY14	5	rnr1D57N-Rep5	TGG	nope	>1bp-ins	G/C-1	none	G/C-1	AAATGTGGCCGCA	GGCCGCA	ACC	ACC	C	none	C>none	C>none_ACC	G/C-1_GGCCGCA	7	FALSE	FALSE
186_v.txt	31971	31971-Deletion-G--	Deletion	1	G	-	6972	12564	55.4919	37.3417	rnr1D57N	FALSE	CAN	JSY14	5	rnr1D57N-Rep5	AGC	nope	>1bp-ins	G/C-1	none	G/C-1	TAATAAGCCAAGC	GCCAAGC	TCG	TCG	C	none	C>none	C>none_TCG	G/C-1_GCCAAGC	7	FALSE	FALSE
186_v.txt	31988	31988-Deletion-T--	Deletion	1	T	-	19	12564	0.151226	53.4211	rnr1D57N	FALSE	CAN	JSY14	5	rnr1D57N-Rep5	ATT	nope	>1bp-ins	A/T-1	none	A/T-1	CATTAATTTAGCT	TTTAGCT	TAA	ATT	T	none	nope	nope_ATT	A/T-1_TTTAGCT	7	FALSE	FALSE
186_v.txt	31997	31997-Deletion-A--	Deletion	1	A	-	8	12564	0.063674	56.625	rnr1D57N	FALSE	CAN	JSY14	5	rnr1D57N-Rep5	TAA	nope	>1bp-ins	A/T-1	none	A/T-1	AGCTTTAAATGGT	AAATGGT	ATT	ATT	T	none	T>none	T>none_ATT	A/T-1_AAATGGT	7	FALSE	FALSE
186_v.txt	32022	32022-Deletion-C--	Deletion	1	C	-	18	12564	0.143266	62.3333	rnr1D57N	FALSE	CAN	JSY14	5	rnr1D57N-Rep5	GCC	nope	>1bp-ins	G/C-1	none	G/C-1	GAGATGCCACGGT	CCACGGT	CGG	GCC	C	none	nope	nope_GCC	G/C-1_CCACGGT	7	FALSE	FALSE
186_v.txt	32081	32081-Deletion-A--	Deletion	1	A	-	23	12563	0.183077	62.3043	rnr1D57N	FALSE	CAN	JSY14	5	rnr1D57N-Rep5	CAA	nope	>1bp-ins	A/T-1	none	A/T-1	CCATGCAAAAAAG	AAAAAAG	GTT	GTT	T	none	T>none	T>none_GTT	A/T-1_AAAAAAG	7	FALSE	FALSE
186_v.txt	32265	32265-Deletion-A--	Deletion	1	A	-	3	27652	0.0108491	37.3333	rnr1D57N	FALSE	CAN	JSY14	5	rnr1D57N-Rep5	TAA	nope	>1bp-ins	A/T-1	none	A/T-1	CCAAATAAAATAC	AAAATAC	ATT	ATT	T	none	T>none	T>none_ATT	A/T-1_AAAATAC	7	FALSE	FALSE
186_v.txt	32305	32305-Deletion-A--	Deletion	1	A	-	3	27653	0.0108487	45.6667	rnr1D57N	FALSE	CAN	JSY14	5	rnr1D57N-Rep5	GAA	nope	>1bp-ins	A/T-1	none	A/T-1	CGGCAGAAATAAT	AAATAAT	CTT	CTT	T	none	T>none	T>none_CTT	A/T-1_AAATAAT	7	FALSE	FALSE
186_v.txt	32346	32346-Deletion-A--	Deletion	1	A	-	110	27653	0.397787	60.3727	rnr1D57N	FALSE	CAN	JSY14	5	rnr1D57N-Rep5	CAA	nope	>1bp-ins	A/T-1	none	A/T-1	TGTGGCAAAACCT	AAAACCT	GTT	GTT	T	none	T>none	T>none_GTT	A/T-1_AAAACCT	7	FALSE	FALSE
186_v.txt	32381	32381-Deletion-A--	Deletion	1	A	-	6	27653	0.0216975	62.5	rnr1D57N	FALSE	CAN	JSY14	5	rnr1D57N-Rep5	TAA	nope	>1bp-ins	A/T-1	none	A/T-1	AATAATAAAGGGA	AAAGGGA	ATT	ATT	T	none	T>none	T>none_ATT	A/T-1_AAAGGGA	7	FALSE	FALSE
186_v.txt	32420	32420-Deletion-T--	Deletion	1	T	-	8	27653	0.02893	62.25	rnr1D57N	FALSE	CAN	JSY14	5	rnr1D57N-Rep5	GTT	nope	>1bp-ins	A/T-1	none	A/T-1	TGTTAGTTTAGGG	TTTAGGG	CAA	GTT	T	none	nope	nope_GTT	A/T-1_TTTAGGG	7	FALSE	FALSE
186_v.txt	32442	32442-Deletion-A--	Deletion	1	A	-	7	27653	0.0253137	52	rnr1D57N	FALSE	CAN	JSY14	5	rnr1D57N-Rep5	TAA	nope	>1bp-ins	A/T-1	none	A/T-1	GGAACTAAAAGTC	AAAAGTC	ATT	ATT	T	none	T>none	T>none_ATT	A/T-1_AAAAGTC	7	FALSE	FALSE
186_v.txt	32498	32498-Deletion-T--	Deletion	1	T	-	42	27653	0.151882	46.6905	rnr1D57N	FALSE	CAN	JSY14	5	rnr1D57N-Rep5	CTT	nope	>1bp-ins	A/T-1	none	A/T-1	AACAACTTTTTTG	TTTTTTG	GAA	CTT	T	none	nope	nope_CTT	A/T-1_TTTTTTG	7	FALSE	FALSE
186_v.txt	32522	32522-Deletion-T--	Deletion	1	T	-	43	27653	0.155498	41.8837	rnr1D57N	FALSE	CAN	JSY14	5	rnr1D57N-Rep5	ATT	nope	>1bp-ins	A/T-1	none	A/T-1	AACGGATTTTCTG	TTTTCTG	TAA	ATT	T	none	nope	nope_ATT	A/T-1_TTTTCTG	7	FALSE	FALSE
186_v.txt	32528	32528-Deletion-G--	Deletion	1	G	-	22	27653	0.0795574	43.9545	rnr1D57N	FALSE	CAN	JSY14	5	rnr1D57N-Rep5	TGG	nope	>1bp-ins	G/C-1	none	G/C-1	TTTTCTGGGGTTT	GGGGTTT	ACC	ACC	C	none	C>none	C>none_ACC	G/C-1_GGGGTTT	7	FALSE	FALSE
186_v.txt	32532	32532-Deletion-T--	Deletion	1	T	-	7	27653	0.0253137	38	rnr1D57N	FALSE	CAN	JSY14	5	rnr1D57N-Rep5	GTT	nope	>1bp-ins	A/T-1	none	A/T-1	CTGGGGTTTGCAG	TTTGCAG	CAA	GTT	T	none	nope	nope_GTT	A/T-1_TTTGCAG	7	FALSE	FALSE
186_v.txt	32583	32583-Deletion-A--	Deletion	1	A	-	2	17176	0.0116442	35	rnr1D57N	FALSE	CAN	JSY14	5	rnr1D57N-Rep5	GAA	nope	>1bp-ins	A/T-1	none	A/T-1	AATGTGAAGGCAG	AAGGCAG	CTT	CTT	T	none	T>none	T>none_CTT	A/T-1_AAGGCAG	7	FALSE	FALSE
186_v.txt	32605	32605-Deletion-A--	Deletion	1	A	-	9	17176	0.0523987	40.4444	rnr1D57N	FALSE	CAN	JSY14	5	rnr1D57N-Rep5	GAA	nope	>1bp-ins	A/T-1	none	A/T-1	AAGAGGAAACCCA	AAACCCA	CTT	CTT	T	none	T>none	T>none_CTT	A/T-1_AAACCCA	7	FALSE	FALSE
186_v.txt	32658	32658-Deletion-C--	Deletion	1	C	-	16	17176	0.0931532	60.1875	rnr1D57N	FALSE	CAN	JSY14	5	rnr1D57N-Rep5	ACC	nope	>1bp-ins	G/C-1	none	G/C-1	CCTGGACCCCAGG	CCCCAGG	TGG	ACC	C	none	nope	nope_ACC	G/C-1_CCCCAGG	7	FALSE	FALSE
186_v.txt	32707	32707-Deletion-C--	Deletion	1	C	-	5	17176	0.0291104	60.8	rnr1D57N	FALSE	CAN	JSY14	5	rnr1D57N-Rep5	ACC	nope	>1bp-ins	G/C-1	none	G/C-1	CGGTAACCCCAGC	CCCCAGC	TGG	ACC	C	none	nope	nope_ACC	G/C-1_CCCCAGC	7	FALSE	FALSE
186_v.txt	32728	32728-Deletion-A--	Deletion	1	A	-	7	17175	0.0407569	55.2857	rnr1D57N	FALSE	CAN	JSY14	5	rnr1D57N-Rep5	CAA	nope	>1bp-ins	A/T-1	none	A/T-1	CCATACAAAAACA	AAAAACA	GTT	GTT	T	none	T>none	T>none_GTT	A/T-1_AAAAACA	7	FALSE	FALSE
186_v.txt	32829	32829-Deletion-G--	Deletion	1	G	-	2	17176	0.0116442	38	rnr1D57N	FALSE	CAN	JSY14	5	rnr1D57N-Rep5	TGT	nope	>1bp-ins	G/C-1	none	G/C-1	ATTATTGTGATAA	GTGATAA	ACA	ACA	C	none	C>none	C>none_ACA	G/C-1_GTGATAA	7	FALSE	FALSE
186_v.txt	32842	32842-Deletion-A--	Deletion	1	A	-	43	17176	0.250349	42.2326	rnr1D57N	FALSE	CAN	JSY14	5	rnr1D57N-Rep5	CAA	nope	>1bp-ins	A/T-1	none	A/T-1	TTACCCAAAAAAT	AAAAAAT	GTT	GTT	T	none	T>none	T>none_GTT	A/T-1_AAAAAAT	7	FALSE	FALSE
186_v.txt	32868	32868-Deletion-G--	Deletion	1	G	-	23	17174	0.133923	37.087	rnr1D57N	FALSE	CAN	JSY14	5	rnr1D57N-Rep5	TGG	nope	>1bp-ins	G/C-1	none	G/C-1	GCCAGTGGAACTT	GGAACTT	ACC	ACC	C	none	C>none	C>none_ACC	G/C-1_GGAACTT	7	FALSE	FALSE
186_v.txt	32884	32884-Deletion-A--	Deletion	1	A	-	7	29334	0.0238631	36.8571	rnr1D57N	FALSE	CAN	JSY14	5	rnr1D57N-Rep5	CAA	nope	>1bp-ins	A/T-1	none	A/T-1	ACGTCCAAAATTG	AAAATTG	GTT	GTT	T	none	T>none	T>none_GTT	A/T-1_AAAATTG	7	FALSE	FALSE
186_v.txt	32924	32924-Deletion-A--	Deletion	1	A	-	33	29334	0.112497	55.8485	rnr1D57N	FALSE	CAN	JSY14	5	rnr1D57N-Rep5	CAA	nope	>1bp-ins	A/T-1	none	A/T-1	CAGGGCAAAAGTG	AAAAGTG	GTT	GTT	T	none	T>none	T>none_GTT	A/T-1_AAAAGTG	7	FALSE	FALSE
186_v.txt	32935	32935-Deletion-C--	Deletion	1	C	-	6	29334	0.0204541	45	rnr1D57N	FALSE	CAN	JSY14	5	rnr1D57N-Rep5	GCC	nope	>1bp-ins	G/C-1	none	G/C-1	TGATTGCCCAAGA	CCCAAGA	CGG	GCC	C	none	nope	nope_GCC	G/C-1_CCCAAGA	7	FALSE	FALSE
186_v.txt	32945	32945-Deletion-C--	Deletion	1	C	-	1	29334	0.00341	38	rnr1D57N	FALSE	CAN	JSY14	5	rnr1D57N-Rep5	ACC	nope	>1bp-ins	G/C-1	none	G/C-1	AGAAAACCAATAC	CCAATAC	TGG	ACC	C	none	nope	nope_ACC	G/C-1_CCAATAC	7	FALSE	FALSE
186_v.txt	33040	33040-Deletion-T--	Deletion	1	T	-	7	29334	0.0238631	59.2857	rnr1D57N	FALSE	CAN	JSY14	5	rnr1D57N-Rep5	ATT	nope	>1bp-ins	A/T-1	none	A/T-1	TAGCCATTTCACC	TTTCACC	TAA	ATT	T	none	nope	nope_ATT	A/T-1_TTTCACC	7	FALSE	FALSE
186_v.txt	33070	33070-Deletion-C--	Deletion	1	C	-	1	29333	0.00341	38	rnr1D57N	FALSE	CAN	JSY14	5	rnr1D57N-Rep5	GCC	nope	>1bp-ins	G/C-1	none	G/C-1	AATATGCCAAAGA	CCAAAGA	CGG	GCC	C	none	nope	nope_GCC	G/C-1_CCAAAGA	7	FALSE	FALSE
186_v.txt	33114	33114-Deletion-C--	Deletion	1	C	-	1	29334	0.00341	38	rnr1D57N	FALSE	CAN	JSY14	5	rnr1D57N-Rep5	GCC	nope	>1bp-ins	G/C-1	none	G/C-1	ACTGGGCCGGCGT	CCGGCGT	CGG	GCC	C	none	nope	nope_GCC	G/C-1_CCGGCGT	7	FALSE	FALSE
186_v.txt	33138	33138-Deletion-A--	Deletion	1	A	-	6	29334	0.0204541	46.6667	rnr1D57N	FALSE	CAN	JSY14	5	rnr1D57N-Rep5	TAA	nope	>1bp-ins	A/T-1	none	A/T-1	GTGGATAAACCAA	AAACCAA	ATT	ATT	T	none	T>none	T>none_ATT	A/T-1_AAACCAA	7	FALSE	FALSE
186_v.txt	33147	33147-Deletion-A--	Deletion	1	A	-	5	29334	0.0170451	37.6	rnr1D57N	FALSE	CAN	JSY14	5	rnr1D57N-Rep5	GAA	nope	>1bp-ins	A/T-1	none	A/T-1	CCAATGAAAAGAC	AAAAGAC	CTT	CTT	T	none	T>none	T>none_CTT	A/T-1_AAAAGAC	7	FALSE	FALSE
186_v.txt	33175	33175-Deletion-G--	Deletion	1	G	-	2	29326	0.00682	38	rnr1D57N	FALSE	CAN	JSY14	5	rnr1D57N-Rep5	AGG	nope	>1bp-ins	G/C-1	none	G/C-1	CACCAAGGGCAAT	GGGCAAT	TCC	TCC	C	none	C>none	C>none_TCC	G/C-1_GGGCAAT	7	FALSE	FALSE
186_v.txt	33459	33459-Deletion-T--	Deletion	1	T	-	12	21090	0.056899	35.0833	rnr1D57N	FALSE	CAN	JSY14	5	rnr1D57N-Rep5	ATT	nope	>1bp-ins	A/T-1	none	A/T-1	TTTGAATTTGTCA	TTTGTCA	TAA	ATT	T	none	nope	nope_ATT	A/T-1_TTTGTCA	7	FALSE	FALSE
186_v.txt	33474	33474-Deletion-C--	Deletion	1	C	-	55	21089	0.260799	28.6727	rnr1D57N	FALSE	CAN	JSY14	5	rnr1D57N-Rep5	GCC	nope	>1bp-ins	G/C-1	none	G/C-1	GCTATGCCTTTTT	CCTTTTT	CGG	GCC	C	none	nope	nope_GCC	G/C-1_CCTTTTT	7	FALSE	FALSE
NL3_v.txt	31723	31723-SNV-A-C	SNV	1	A	C	3	6480	0.0462963	45.3333	rnr1D57N	FALSE	CAN	JSY3602	6	rnr1D57N-Rep6	CAA	A>C	G/C+1	A/T-1	TA>GC	TA>GC	TGTCCCAAAAAGT	AAAAAGT	GTT	GTT	T	G	T>G	T>G_GTT	TA>GC_AAAAAGT	7	FALSE	FALSE
NL3_v.txt	31840	31840-SNV-A-C	SNV	1	A	C	2	6480	0.0308642	64	rnr1D57N	FALSE	CAN	JSY3602	6	rnr1D57N-Rep6	AAG	A>C	G/C+1	A/T-1	TA>GC	TA>GC	GAAATAAGATCCA	AGATCCA	TTC	TTC	T	G	T>G	T>G_TTC	TA>GC_AGATCCA	7	FALSE	FALSE
NL3_v.txt	32445	32445-SNV-A-C	SNV	1	A	C	12	11034	0.108755	51.75	rnr1D57N	FALSE	CAN	JSY3602	6	rnr1D57N-Rep6	AAG	A>C	G/C+1	A/T-1	TA>GC	TA>GC	ACTAAAAGTCCAA	AGTCCAA	TTC	TTC	T	G	T>G	T>G_TTC	TA>GC_AGTCCAA	7	FALSE	FALSE
NL3_v.txt	32915	32915-SNV-T-G	SNV	1	T	G	76	11230	0.676759	36.8947	rnr1D57N	FALSE	CAN	JSY3602	6	rnr1D57N-Rep6	GTT	T>G	G/C+1	A/T-1	TA>GC	TA>GC	ACTAAGTTCCAGG	TTCCAGG	CAA	GTT	T	C	T>G	T>G_GTT	TA>GC_TTCCAGG	7	FALSE	FALSE
NL3_v.txt	33023	33023-SNV-A-C	SNV	1	A	C	1	11230	0.00891	64	rnr1D57N	FALSE	CAN	JSY3602	6	rnr1D57N-Rep6	CAG	A>C	G/C+1	A/T-1	TA>GC	TA>GC	TGTAACAGGGATG	AGGGATG	GTC	GTC	T	G	T>G	T>G_GTC	TA>GC_AGGGATG	7	FALSE	FALSE
NL3_v.txt	33166	33166-SNV-T-G	SNV	1	T	G	15	11228	0.133595	38.8	rnr1D57N	FALSE	CAN	JSY3602	6	rnr1D57N-Rep6	GTA	T>G	G/C+1	A/T-1	TA>GC	TA>GC	CAATAGTACCACC	TACCACC	CAT	GTA	T	C	T>G	T>G_GTA	TA>GC_TACCACC	7	FALSE	FALSE
NL3_v.txt	32445	32445-SNV-A-G	SNV	1	A	G	8	11034	0.0725032	47.875	rnr1D57N	FALSE	CAN	JSY3602	6	rnr1D57N-Rep6	AAG	A>G	G/C+1	A/T-1	TA>CG	TA>CG	ACTAAAAGTCCAA	AGTCCAA	TTC	TTC	T	C	T>C	T>C_TTC	TA>CG_AGTCCAA	7	FALSE	FALSE
NL3_v.txt	33023	33023-SNV-A-G	SNV	1	A	G	9	11230	0.0801425	59.8889	rnr1D57N	FALSE	CAN	JSY3602	6	rnr1D57N-Rep6	CAG	A>G	G/C+1	A/T-1	TA>CG	TA>CG	TGTAACAGGGATG	AGGGATG	GTC	GTC	T	C	T>C	T>C_GTC	TA>CG_AGGGATG	7	FALSE	FALSE
NL3_v.txt	31840	31840-SNV-A-T	SNV	1	A	T	3	6480	0.0462963	60.6667	rnr1D57N	FALSE	CAN	JSY3602	6	rnr1D57N-Rep6	AAG	A>T	A/T+1	A/T-1	TA>AT	TA>AT	GAAATAAGATCCA	AGATCCA	TTC	TTC	T	A	T>A	T>A_TTC	TA>AT_AGATCCA	7	FALSE	FALSE
NL3_v.txt	32766	32766-SNV-T-A	SNV	1	T	A	7	10674	0.0655799	56.7143	rnr1D57N	FALSE	CAN	JSY3602	6	rnr1D57N-Rep6	TTT	T>A	A/T+1	A/T-1	TA>AT	TA>AT	AAAACTTTGATGG	TTGATGG	AAA	TTT	T	T	T>A	T>A_TTT	TA>AT_TTGATGG	7	FALSE	FALSE
NL3_v.txt	33005	33005-SNV-T-A	SNV	1	T	A	2	11230	0.0178094	58.5	rnr1D57N	FALSE	CAN	JSY3602	6	rnr1D57N-Rep6	CTG	T>A	A/T+1	A/T-1	TA>AT	TA>AT	GAAAACTGTGAAA	TGTGAAA	GAC	CTG	T	T	T>A	T>A_CTG	TA>AT_TGTGAAA	7	FALSE	FALSE
NL3_v.txt	31650	31650-SNV-C-T	SNV	1	C	T	16	6480	0.246914	36.875	rnr1D57N	FALSE	CAN	JSY3602	6	rnr1D57N-Rep6	GCG	C>T	A/T+1	G/C-1	CG>TA	CG>TA	AGAATGCGAAATG	CGAAATG	CGC	GCG	C	A	C>T	C>T_GCG	CG>TA_CGAAATG	7	FALSE	FALSE
NL3_v.txt	31882	31882-SNV-C-T	SNV	1	C	T	13	6480	0.200617	36.6923	rnr1D57N	FALSE	CAN	JSY3602	6	rnr1D57N-Rep6	GCA	C>T	A/T+1	G/C-1	CG>TA	CG>TA	AGGCGGCAGCAAA	CAGCAAA	CGT	GCA	C	A	C>T	C>T_GCA	CG>TA_CAGCAAA	7	FALSE	FALSE
NL3_v.txt	31962	31962-SNV-G-A	SNV	1	G	A	12	8348	0.143747	34.8333	rnr1D57N	FALSE	CAN	JSY3602	6	rnr1D57N-Rep6	CGC	G>A	A/T+1	G/C-1	CG>TA	CG>TA	GTGGCCGCATAAT	GCATAAT	GCG	GCG	C	T	C>T	C>T_GCG	CG>TA_GCATAAT	7	FALSE	FALSE
NL3_v.txt	32271	32271-SNV-C-T	SNV	1	C	T	14	11034	0.126881	37.1429	rnr1D57N	FALSE	CAN	JSY3602	6	rnr1D57N-Rep6	ACG	C>T	A/T+1	G/C-1	CG>TA	CG>TA	AAAATACGGGAAC	CGGGAAC	TGC	ACG	C	A	C>T	C>T_ACG	CG>TA_CGGGAAC	7	FALSE	FALSE
NL3_v.txt	32299	32299-SNV-C-T	SNV	1	C	T	15	11034	0.135943	36.4	rnr1D57N	FALSE	CAN	JSY3602	6	rnr1D57N-Rep6	GCG	C>T	A/T+1	G/C-1	CG>TA	CG>TA	AATTTGCGGCAGA	CGGCAGA	CGC	GCG	C	A	C>T	C>T_GCG	CG>TA_CGGCAGA	7	FALSE	FALSE
NL3_v.txt	32449	32449-SNV-C-T	SNV	1	C	T	28	11034	0.253761	57.3571	rnr1D57N	FALSE	CAN	JSY3602	6	rnr1D57N-Rep6	CCA	C>T	A/T+1	G/C-1	CG>TA	CG>TA	AAAGTCCAATGAA	CAATGAA	GGT	CCA	C	A	C>T	C>T_CCA	CG>TA_CAATGAA	7	FALSE	FALSE
NL3_v.txt	32590	32590-SNV-C-T	SNV	1	C	T	15	10674	0.140528	36.6667	rnr1D57N	FALSE	CAN	JSY3602	6	rnr1D57N-Rep6	GCG	C>T	A/T+1	G/C-1	CG>TA	CG>TA	AGGCAGCGTTAAT	CGTTAAT	CGC	GCG	C	A	C>T	C>T_GCG	CG>TA_CGTTAAT	7	FALSE	FALSE
NL3_v.txt	32700	32700-SNV-C-T	SNV	1	C	T	20	10674	0.187371	61.05	rnr1D57N	FALSE	CAN	JSY3602	6	rnr1D57N-Rep6	GCC	C>T	A/T+1	G/C-1	CG>TA	CG>TA	ACTGGGCCGGTAA	CCGGTAA	CGG	GCC	C	A	C>T	C>T_GCC	CG>TA_CCGGTAA	7	FALSE	FALSE
NL3_v.txt	32797	32797-SNV-C-T	SNV	1	C	T	5	10674	0.0468428	34.4	rnr1D57N	FALSE	CAN	JSY3602	6	rnr1D57N-Rep6	CCG	C>T	A/T+1	G/C-1	CG>TA	CG>TA	ATTCACCGTAATA	CGTAATA	GGC	CCG	C	A	C>T	C>T_CCG	CG>TA_CGTAATA	7	FALSE	FALSE
NL3_v.txt	32798	32798-SNV-G-A	SNV	1	G	A	13	10674	0.121791	39	rnr1D57N	FALSE	CAN	JSY3602	6	rnr1D57N-Rep6	CGT	G>A	A/T+1	G/C-1	CG>TA	CG>TA	TTCACCGTAATAT	GTAATAT	GCA	GCA	C	T	C>T	C>T_GCA	CG>TA_GTAATAT	7	FALSE	FALSE
NL3_v.txt	32855	32855-SNV-C-T	SNV	1	C	T	18	10674	0.168634	35.1111	rnr1D57N	FALSE	CAN	JSY3602	6	rnr1D57N-Rep6	TCC	C>T	A/T+1	G/C-1	CG>TA	CG>TA	ACTAATCCATGCC	CCATGCC	AGG	TCC	C	A	C>T	C>T_TCC	CG>TA_CCATGCC	7	FALSE	FALSE
NL3_v.txt	32860	32860-SNV-C-T	SNV	1	C	T	11	10674	0.103054	37.4545	rnr1D57N	FALSE	CAN	JSY3602	6	rnr1D57N-Rep6	GCC	C>T	A/T+1	G/C-1	CG>TA	CG>TA	TCCATGCCGCCAG	CCGCCAG	CGG	GCC	C	A	C>T	C>T_GCC	CG>TA_CCGCCAG	7	FALSE	FALSE
NL3_v.txt	32901	32901-SNV-C-T	SNV	1	C	T	22	11230	0.195904	36.4091	rnr1D57N	FALSE	CAN	JSY3602	6	rnr1D57N-Rep6	GCC	C>T	A/T+1	G/C-1	CG>TA	CG>TA	ACTTGGCCAACTA	CCAACTA	CGG	GCC	C	A	C>T	C>T_GCC	CG>TA_CCAACTA	7	FALSE	FALSE
NL3_v.txt	32922	32922-SNV-G-A	SNV	1	G	A	13	11230	0.115761	34.3077	rnr1D57N	FALSE	CAN	JSY3602	6	rnr1D57N-Rep6	GGC	G>A	A/T+1	G/C-1	CG>TA	CG>TA	TCCAGGGCAAAAG	GCAAAAG	CCG	CCG	C	T	C>T	C>T_CCG	CG>TA_GCAAAAG	7	FALSE	FALSE
NL3_v.txt	32967	32967-SNV-G-A	SNV	1	G	A	23	11230	0.204809	61.3043	rnr1D57N	FALSE	CAN	JSY3602	6	rnr1D57N-Rep6	CGC	G>A	A/T+1	G/C-1	CG>TA	CG>TA	TTGGCCGCACCAA	GCACCAA	GCG	GCG	C	T	C>T	C>T_GCG	CG>TA_GCACCAA	7	FALSE	FALSE
NL3_v.txt	33006	33006-SNV-G-A	SNV	1	G	A	1	11230	0.00891	11	rnr1D57N	FALSE	CAN	JSY3602	6	rnr1D57N-Rep6	TGT	G>A	A/T+1	G/C-1	CG>TA	CG>TA	AAAACTGTGAAAG	GTGAAAG	ACA	ACA	C	T	C>T	C>T_ACA	CG>TA_GTGAAAG	7	FALSE	FALSE
NL3_v.txt	33056	33056-SNV-C-T	SNV	1	C	T	15	11230	0.133571	53.4667	rnr1D57N	FALSE	CAN	JSY3602	6	rnr1D57N-Rep6	GCG	C>T	A/T+1	G/C-1	CG>TA	CG>TA	GGACTGCGTGACA	CGTGACA	CGC	GCG	C	A	C>T	C>T_GCG	CG>TA_CGTGACA	7	FALSE	FALSE
NL3_v.txt	33070	33070-SNV-C-T	SNV	1	C	T	18	11230	0.160285	53.6667	rnr1D57N	FALSE	CAN	JSY3602	6	rnr1D57N-Rep6	GCC	C>T	A/T+1	G/C-1	CG>TA	CG>TA	AATATGCCAAAGA	CCAAAGA	CGG	GCC	C	A	C>T	C>T_GCC	CG>TA_CCAAAGA	7	FALSE	FALSE
NL3_v.txt	33113	33113-SNV-G-A	SNV	1	G	A	15	11230	0.133571	36.3333	rnr1D57N	FALSE	CAN	JSY3602	6	rnr1D57N-Rep6	GGC	G>A	A/T+1	G/C-1	CG>TA	CG>TA	CACTGGGCCGGCG	GCCGGCG	CCG	CCG	C	T	C>T	C>T_CCG	CG>TA_GCCGGCG	7	FALSE	FALSE
NL3_v.txt	33114	33114-SNV-C-T	SNV	1	C	T	20	11230	0.178094	37.65	rnr1D57N	FALSE	CAN	JSY3602	6	rnr1D57N-Rep6	GCC	C>T	A/T+1	G/C-1	CG>TA	CG>TA	ACTGGGCCGGCGT	CCGGCGT	CGG	GCC	C	A	C>T	C>T_GCC	CG>TA_CCGGCGT	7	FALSE	FALSE
NL3_v.txt	33276	33276-SNV-G-A	SNV	1	G	A	14	11357	0.123272	53.4286	rnr1D57N	FALSE	CAN	JSY3602	6	rnr1D57N-Rep6	CGT	G>A	A/T+1	G/C-1	CG>TA	CG>TA	GAGAACGTATCCT	GTATCCT	GCA	GCA	C	T	C>T	C>T_GCA	CG>TA_GTATCCT	7	FALSE	FALSE
NL3_v.txt	33310	33310-SNV-G-A	SNV	1	G	A	15	11357	0.132077	46.8667	rnr1D57N	FALSE	CAN	JSY3602	6	rnr1D57N-Rep6	CGC	G>A	A/T+1	G/C-1	CG>TA	CG>TA	AAGAGCGCAATGG	GCAATGG	GCG	GCG	C	T	C>T	C>T_GCG	CG>TA_GCAATGG	7	FALSE	FALSE
NL3_v.txt	33392	33392-SNV-G-A	SNV	1	G	A	17	11357	0.149687	51.7647	rnr1D57N	FALSE	CAN	JSY3602	6	rnr1D57N-Rep6	CGT	G>A	A/T+1	G/C-1	CG>TA	CG>TA	AACGTCGTGAAAG	GTGAAAG	GCA	GCA	C	T	C>T	C>T_GCA	CG>TA_GTGAAAG	7	FALSE	FALSE
NL3_v.txt	33474	33474-SNV-C-T	SNV	1	C	T	15	11355	0.1321	34.0667	rnr1D57N	FALSE	CAN	JSY3602	6	rnr1D57N-Rep6	GCC	C>T	A/T+1	G/C-1	CG>TA	CG>TA	GCTATGCCTTTTT	CCTTTTT	CGG	GCC	C	A	C>T	C>T_GCC	CG>TA_CCTTTTT	7	FALSE	FALSE
NL3_v.txt	31956	31956-SNV-G-C	SNV	1	G	C	6	8348	0.0718735	34.1667	rnr1D57N	FALSE	CAN	JSY3602	6	rnr1D57N-Rep6	TGT	G>C	G/C+1	G/C-1	CG>GC	CG>GC	ATAAATGTGGCCG	GTGGCCG	ACA	ACA	C	G	C>G	C>G_ACA	CG>GC_GTGGCCG	7	FALSE	FALSE
NL3_v.txt	32001	32001-SNV-G-C	SNV	1	G	C	1	8348	0.0119789	38.9996	rnr1D57N	FALSE	CAN	JSY3602	6	rnr1D57N-Rep6	TGG	G>C	G/C+1	G/C-1	CG>GC	CG>GC	TTAAATGGTAACT	GGTAACT	ACC	ACC	C	G	C>G	C>G_ACC	CG>GC_GGTAACT	7	FALSE	FALSE
NL3_v.txt	32027	32027-SNV-G-C	SNV	1	G	C	4	8348	0.0479157	63.25	rnr1D57N	FALSE	CAN	JSY3602	6	rnr1D57N-Rep6	GGT	G>C	G/C+1	G/C-1	CG>GC	CG>GC	GCCACGGTATTTC	GTATTTC	CCA	CCA	C	G	C>G	C>G_CCA	CG>GC_GTATTTC	7	FALSE	FALSE
NL3_v.txt	32064	32064-SNV-G-C	SNV	1	G	C	11	8348	0.131768	58.3636	rnr1D57N	FALSE	CAN	JSY3602	6	rnr1D57N-Rep6	TGA	G>C	G/C+1	G/C-1	CG>GC	CG>GC	GAGATTGAGATAA	GAGATAA	ACT	ACT	C	G	C>G	C>G_ACT	CG>GC_GAGATAA	7	FALSE	FALSE
NL3_v.txt	32449	32449-SNV-C-G	SNV	1	C	G	2	11034	0.0181258	58	rnr1D57N	FALSE	CAN	JSY3602	6	rnr1D57N-Rep6	CCA	C>G	G/C+1	G/C-1	CG>GC	CG>GC	AAAGTCCAATGAA	CAATGAA	GGT	CCA	C	C	C>G	C>G_CCA	CG>GC_CAATGAA	7	FALSE	FALSE
NL3_v.txt	32876	32876-SNV-G-C	SNV	1	G	C	22	11223	0.196026	21.6818	rnr1D57N	FALSE	CAN	JSY3602	6	rnr1D57N-Rep6	TGT	G>C	G/C+1	G/C-1	CG>GC	CG>GC	AACTTTGTACGTC	GTACGTC	ACA	ACA	C	G	C>G	C>G_ACA	CG>GC_GTACGTC	7	FALSE	FALSE
NL3_v.txt	32945	32945-SNV-C-G	SNV	1	C	G	13	11230	0.115761	34.7692	rnr1D57N	FALSE	CAN	JSY3602	6	rnr1D57N-Rep6	ACC	C>G	G/C+1	G/C-1	CG>GC	CG>GC	AGAAAACCAATAC	CCAATAC	TGG	ACC	C	C	C>G	C>G_ACC	CG>GC_CCAATAC	7	FALSE	FALSE
NL3_v.txt	32997	32997-SNV-G-C	SNV	1	G	C	4	11230	0.0356189	64	rnr1D57N	FALSE	CAN	JSY3602	6	rnr1D57N-Rep6	TGA	G>C	G/C+1	G/C-1	CG>GC	CG>GC	CTTTGTGAGAAAA	GAGAAAA	ACT	ACT	C	G	C>G	C>G_ACT	CG>GC_GAGAAAA	7	FALSE	FALSE
NL3_v.txt	33018	33018-SNV-G-C	SNV	1	G	C	7	11230	0.062333	64	rnr1D57N	FALSE	CAN	JSY3602	6	rnr1D57N-Rep6	TGT	G>C	G/C+1	G/C-1	CG>GC	CG>GC	GAGGATGTAACAG	GTAACAG	ACA	ACA	C	G	C>G	C>G_ACA	CG>GC_GTAACAG	7	FALSE	FALSE
NL3_v.txt	33169	33169-SNV-C-G	SNV	1	C	G	5	11227	0.0445355	38.8	rnr1D57N	FALSE	CAN	JSY3602	6	rnr1D57N-Rep6	CCA	C>G	G/C+1	G/C-1	CG>GC	CG>GC	TAGTACCACCAAG	CACCAAG	GGT	CCA	C	C	C>G	C>G_CCA	CG>GC_CACCAAG	7	FALSE	FALSE
NL3_v.txt	33205	33205-SNV-G-C	SNV	1	G	C	35	11357	0.30818	37.6571	rnr1D57N	FALSE	CAN	JSY3602	6	rnr1D57N-Rep6	AGC	G>C	G/C+1	G/C-1	CG>GC	CG>GC	GCTTAAGCTCTCT	GCTCTCT	TCG	TCG	C	G	C>G	C>G_TCG	CG>GC_GCTCTCT	7	FALSE	FALSE
NL3_v.txt	33456	33456-SNV-G-C	SNV	1	G	C	4	11355	0.0352268	39	rnr1D57N	FALSE	CAN	JSY3602	6	rnr1D57N-Rep6	TGA	G>C	G/C+1	G/C-1	CG>GC	CG>GC	TCTTTTGAATTTG	GAATTTG	ACT	ACT	C	G	C>G	C>G_ACT	CG>GC_GAATTTG	7	FALSE	FALSE
NL3_v.txt	32368	32368-SNV-C-A	SNV	1	C	A	23	11034	0.208447	63.5652	rnr1D57N	FALSE	CAN	JSY3602	6	rnr1D57N-Rep6	TCA	C>A	A/T+1	G/C-1	CG>AT	CG>AT	AGTTCTCAATAGC	CAATAGC	AGT	TCA	C	T	C>A	C>A_TCA	CG>AT_CAATAGC	7	FALSE	FALSE
NL3_v.txt	32399	32399-SNV-G-T	SNV	1	G	T	10	11034	0.090629	64	rnr1D57N	FALSE	CAN	JSY3602	6	rnr1D57N-Rep6	CGT	G>T	A/T+1	G/C-1	CG>AT	CG>AT	AGAAACGTAGGAA	GTAGGAA	GCA	GCA	C	A	C>A	C>A_GCA	CG>AT_GTAGGAA	7	FALSE	FALSE
NL3_v.txt	32432	32432-SNV-G-T	SNV	1	G	T	11	11034	0.0996919	61.7273	rnr1D57N	FALSE	CAN	JSY3602	6	rnr1D57N-Rep6	TGT	G>T	A/T+1	G/C-1	CG>AT	CG>AT	GTCATTGTATGGA	GTATGGA	ACA	ACA	C	A	C>A	C>A_ACA	CG>AT_GTATGGA	7	FALSE	FALSE
NL3_v.txt	32629	32629-SNV-C-A	SNV	1	C	A	7	10674	0.0655799	35.4286	rnr1D57N	FALSE	CAN	JSY3602	6	rnr1D57N-Rep6	TCG	C>A	A/T+1	G/C-1	CG>AT	CG>AT	TCCCTTCGTTTTT	CGTTTTT	AGC	TCG	C	T	C>A	C>A_TCG	CG>AT_CGTTTTT	7	FALSE	FALSE
NL3_v.txt	32735	32735-SNV-G-T	SNV	1	G	T	14	10674	0.13116	61.5	rnr1D57N	FALSE	CAN	JSY3602	6	rnr1D57N-Rep6	AGT	G>T	A/T+1	G/C-1	CG>AT	CG>AT	AAAACAGTATATT	GTATATT	TCA	TCA	C	A	C>A	C>A_TCA	CG>AT_GTATATT	7	FALSE	FALSE
NL3_v.txt	32797	32797-SNV-C-A	SNV	1	C	A	10	10674	0.0936856	39	rnr1D57N	FALSE	CAN	JSY3602	6	rnr1D57N-Rep6	CCG	C>A	A/T+1	G/C-1	CG>AT	CG>AT	ATTCACCGTAATA	CGTAATA	GGC	CCG	C	T	C>A	C>A_CCG	CG>AT_CGTAATA	7	FALSE	FALSE
NL3_v.txt	32798	32798-SNV-G-T	SNV	1	G	T	4	10674	0.0374742	38.75	rnr1D57N	FALSE	CAN	JSY3602	6	rnr1D57N-Rep6	CGT	G>T	A/T+1	G/C-1	CG>AT	CG>AT	TTCACCGTAATAT	GTAATAT	GCA	GCA	C	A	C>A	C>A_GCA	CG>AT_GTAATAT	7	FALSE	FALSE
NL3_v.txt	32997	32997-SNV-G-T	SNV	1	G	T	6	11230	0.0534283	64	rnr1D57N	FALSE	CAN	JSY3602	6	rnr1D57N-Rep6	TGA	G>T	A/T+1	G/C-1	CG>AT	CG>AT	CTTTGTGAGAAAA	GAGAAAA	ACT	ACT	C	A	C>A	C>A_ACT	CG>AT_GAGAAAA	7	FALSE	FALSE
NL3_v.txt	33024	33024-SNV-G-T	SNV	1	G	T	16	11230	0.142476	61.5626	rnr1D57N	FALSE	CAN	JSY3602	6	rnr1D57N-Rep6	AGG	G>T	A/T+1	G/C-1	CG>AT	CG>AT	GTAACAGGGATGA	GGGATGA	TCC	TCC	C	A	C>A	C>A_TCC	CG>AT_GGGATGA	7	FALSE	FALSE
NL3_v.txt	33151	33151-SNV-G-T	SNV	1	G	T	11	11230	0.0979519	35.1818	rnr1D57N	FALSE	CAN	JSY3602	6	rnr1D57N-Rep6	AGA	G>T	A/T+1	G/C-1	CG>AT	CG>AT	TGAAAAGACCTGT	GACCTGT	TCT	TCT	C	A	C>A	C>A_TCT	CG>AT_GACCTGT	7	FALSE	FALSE
NL3_v.txt	33186	33186-SNV-C-A	SNV	1	C	A	57	11350	0.502203	27.7895	rnr1D57N	FALSE	CAN	JSY3602	6	rnr1D57N-Rep6	ACC	C>A	A/T+1	G/C-1	CG>AT	CG>AT	ATCATACCAATAT	CCAATAT	TGG	ACC	C	T	C>A	C>A_ACC	CG>AT_CCAATAT	7	FALSE	FALSE
NL3_v.txt	33474	33474-SNV-C-A	SNV	1	C	A	13	11355	0.114487	36.6154	rnr1D57N	FALSE	CAN	JSY3602	6	rnr1D57N-Rep6	GCC	C>A	A/T+1	G/C-1	CG>AT	CG>AT	GCTATGCCTTTTT	CCTTTTT	CGG	GCC	C	T	C>A	C>A_GCC	CG>AT_CCTTTTT	7	FALSE	FALSE
NL3_v.txt	32092	32092-Replacement-CA-T	Replacement	2	CA	T	5	8348	0.0598946	57.6	rnr1D57N	FALSE	CAN	JSY3602	6	rnr1D57N-Rep6	GCA	nope	A/T+1	>1bpdel	none	Replac.	AGCCTGCAACACC	CAACACC	CGT	GCA	CA	A	NA	NA_GCA	Replac._CAACACC	7	FALSE	FALSE
NL3_v.txt	32001	32001-MNV-GG-TT	MNV	2	GG	TT	8	8348	0.0958313	38.8125	rnr1D57N	FALSE	CAN	JSY3602	6	rnr1D57N-Rep6	TGG	nope	>1bp-ins	>1bpdel	none	MNV	TTAAATGGTAACT	GGTAACT	ACC	TGG	GG	none	NA	NA_TGG	MNV_GGTAACT	7	FALSE	FALSE
NL3_v.txt	32641	32641-MNV-TA-AT	MNV	2	TA	AT	10	10674	0.0936856	39.4919	rnr1D57N	FALSE	CAN	JSY3602	6	rnr1D57N-Rep6	TTA	nope	>1bp-ins	>1bpdel	none	MNV	TATCCTTAGATAT	TAGATAT	AAT	TTA	TA	none	NA	NA_TTA	MNV_TAGATAT	7	FALSE	FALSE
NL3_v.txt	31997	31997-Insertion---A	Insertion	1	-	A	115	8348	1.37758	38.4609	rnr1D57N	FALSE	CAN	JSY3602	6	rnr1D57N-Rep6	TAA	nope	A/T+1	>1bpdel	none	A/T+1	AGCTTTAAATGGT	AAATGGT	ATT	TAA	-	T	NA	NA_TAA	A/T+1_AAATGGT	7	FALSE	FALSE
NL3_v.txt	32081	32081-Insertion---A	Insertion	1	-	A	60	8348	0.718735	64	rnr1D57N	FALSE	CAN	JSY3602	6	rnr1D57N-Rep6	CAA	nope	A/T+1	>1bpdel	none	A/T+1	CCATGCAAAAAAG	AAAAAAG	GTT	CAA	-	T	NA	NA_CAA	A/T+1_AAAAAAG	7	FALSE	FALSE
NL3_v.txt	32210	32210-Insertion---T	Insertion	1	-	T	2	8348	0.0239578	39	rnr1D57N	FALSE	CAN	JSY3602	6	rnr1D57N-Rep6	CTT	nope	A/T+1	>1bpdel	none	A/T+1	ACCACCTTTGGTG	TTTGGTG	GAA	CTT	-	A	NA	NA_CTT	A/T+1_TTTGGTG	7	FALSE	FALSE
NL3_v.txt	32604	32604-Insertion---C	Insertion	1	-	C	5	10674	0.0468428	34	rnr1D57N	FALSE	CAN	JSY3602	6	rnr1D57N-Rep6	GGA	nope	G/C+1	>1bpdel	none	G/C+1	AAAGAGGAAACCC	GAAACCC	CCT	GGA	-	G	NA	NA_GGA	G/C+1_GAAACCC	7	FALSE	FALSE
NL3_v.txt	32631	32631-Insertion---T	Insertion	1	-	T	2	10674	0.0187371	38.5	rnr1D57N	FALSE	CAN	JSY3602	6	rnr1D57N-Rep6	GTT	nope	A/T+1	>1bpdel	none	A/T+1	CCTTCGTTTTTAT	TTTTTAT	CAA	GTT	-	A	NA	NA_GTT	A/T+1_TTTTTAT	7	FALSE	FALSE
NL3_v.txt	32842	32842-Insertion---A	Insertion	1	-	A	24	10674	0.224845	37.7083	rnr1D57N	FALSE	CAN	JSY3602	6	rnr1D57N-Rep6	CAA	nope	A/T+1	>1bpdel	none	A/T+1	TTACCCAAAAAAT	AAAAAAT	GTT	CAA	-	T	NA	NA_CAA	A/T+1_AAAAAAT	7	FALSE	FALSE
NL3_v.txt	32991	32991-Insertion---A	Insertion	1	-	A	3	11230	0.0267142	60	rnr1D57N	FALSE	CAN	JSY3602	6	rnr1D57N-Rep6	TCT	nope	A/T+1	>1bpdel	none	A/T+1	AGGAATCTTTGTG	CTTTGTG	AGA	TCT	-	T	NA	NA_TCT	A/T+1_CTTTGTG	7	FALSE	FALSE
NL3_v.txt	33161	33161-Insertion---A	Insertion	1	-	A	3	11229	0.0267165	38.6667	rnr1D57N	FALSE	CAN	JSY3602	6	rnr1D57N-Rep6	CAA	nope	A/T+1	>1bpdel	none	A/T+1	TGTACCAATAGTA	AATAGTA	GTT	CAA	-	T	NA	NA_CAA	A/T+1_AATAGTA	7	FALSE	FALSE
NL3_v.txt	32629	32629-Deletion-CG--	Deletion	2	CG	-	10	10674	0.0936856	36.3	rnr1D57N	FALSE	CAN	JSY3602	6	rnr1D57N-Rep6	TCG	nope	>1bp-ins	>1bpdel	none	>1bpdel	TCCCTTCGTTTTT	CGTTTTT	AGC	TCG	CG	none	NA	NA_TCG	>1bpdel_CGTTTTT	7	FALSE	FALSE
NL3_v.txt	33005	33005-Deletion-TG--	Deletion	2	TG	-	16	11230	0.142476	62.8125	rnr1D57N	FALSE	CAN	JSY3602	6	rnr1D57N-Rep6	CTG	nope	>1bp-ins	>1bpdel	none	>1bpdel	GAAAACTGTGAAA	TGTGAAA	GAC	CTG	TG	none	NA	NA_CTG	>1bpdel_TGTGAAA	7	FALSE	FALSE
NL3_v.txt	31711	31711-Deletion-A--	Deletion	1	A	-	51	6480	0.787037	32.3922	rnr1D57N	FALSE	CAN	JSY3602	6	rnr1D57N-Rep6	CAA	nope	>1bp-ins	A/T-1	none	A/T-1	CATTCCAAAATTT	AAAATTT	GTT	GTT	T	none	T>none	T>none_GTT	A/T-1_AAAATTT	7	FALSE	FALSE
NL3_v.txt	31723	31723-Deletion-A--	Deletion	1	A	-	5	6480	0.0771605	64	rnr1D57N	FALSE	CAN	JSY3602	6	rnr1D57N-Rep6	CAA	nope	>1bp-ins	A/T-1	none	A/T-1	TGTCCCAAAAAGT	AAAAAGT	GTT	GTT	T	none	T>none	T>none_GTT	A/T-1_AAAAAGT	7	FALSE	FALSE
NL3_v.txt	32001	32001-Deletion-G--	Deletion	1	G	-	1	8348	0.0119789	38	rnr1D57N	FALSE	CAN	JSY3602	6	rnr1D57N-Rep6	TGG	nope	>1bp-ins	G/C-1	none	G/C-1	TTAAATGGTAACT	GGTAACT	ACC	ACC	C	none	C>none	C>none_ACC	G/C-1_GGTAACT	7	FALSE	FALSE
NL3_v.txt	32081	32081-Deletion-A--	Deletion	1	A	-	6	8348	0.0718735	64	rnr1D57N	FALSE	CAN	JSY3602	6	rnr1D57N-Rep6	CAA	nope	>1bp-ins	A/T-1	none	A/T-1	CCATGCAAAAAAG	AAAAAAG	GTT	GTT	T	none	T>none	T>none_GTT	A/T-1_AAAAAAG	7	FALSE	FALSE
NL3_v.txt	32093	32093-Deletion-A--	Deletion	1	A	-	6084	8348	72.8797	61.5026	rnr1D57N	FALSE	CAN	JSY3602	6	rnr1D57N-Rep6	CAA	nope	>1bp-ins	A/T-1	none	A/T-1	GCCTGCAACACCA	AACACCA	GTT	GTT	T	none	T>none	T>none_GTT	A/T-1_AACACCA	7	FALSE	FALSE
NL3_v.txt	32490	32490-Deletion-A--	Deletion	1	A	-	5	11034	0.0453145	38.6	rnr1D57N	FALSE	CAN	JSY3602	6	rnr1D57N-Rep6	GAA	nope	>1bp-ins	A/T-1	none	A/T-1	ATACGGAAAACAA	AAAACAA	CTT	CTT	T	none	T>none	T>none_CTT	A/T-1_AAAACAA	7	FALSE	FALSE
NL3_v.txt	32498	32498-Deletion-T--	Deletion	1	T	-	12	11034	0.108755	37.75	rnr1D57N	FALSE	CAN	JSY3602	6	rnr1D57N-Rep6	CTT	nope	>1bp-ins	A/T-1	none	A/T-1	AACAACTTTTTTG	TTTTTTG	GAA	CTT	T	none	nope	nope_CTT	A/T-1_TTTTTTG	7	FALSE	FALSE
NL3_v.txt	32658	32658-Deletion-C--	Deletion	1	C	-	3	10674	0.0281057	64	rnr1D57N	FALSE	CAN	JSY3602	6	rnr1D57N-Rep6	ACC	nope	>1bp-ins	G/C-1	none	G/C-1	CCTGGACCCCAGG	CCCCAGG	TGG	ACC	C	none	nope	nope_ACC	G/C-1_CCCCAGG	7	FALSE	FALSE
NL3_v.txt	32707	32707-Deletion-C--	Deletion	1	C	-	4	10674	0.0374742	64	rnr1D57N	FALSE	CAN	JSY3602	6	rnr1D57N-Rep6	ACC	nope	>1bp-ins	G/C-1	none	G/C-1	CGGTAACCCCAGC	CCCCAGC	TGG	ACC	C	none	nope	nope_ACC	G/C-1_CCCCAGC	7	FALSE	FALSE
NL3_v.txt	32728	32728-Deletion-A--	Deletion	1	A	-	6	10674	0.0562114	49.1667	rnr1D57N	FALSE	CAN	JSY3602	6	rnr1D57N-Rep6	CAA	nope	>1bp-ins	A/T-1	none	A/T-1	CCATACAAAAACA	AAAAACA	GTT	GTT	T	none	T>none	T>none_GTT	A/T-1_AAAAACA	7	FALSE	FALSE
NL3_v.txt	32796	32796-Deletion-C--	Deletion	1	C	-	4	10674	0.0374742	37.75	rnr1D57N	FALSE	CAN	JSY3602	6	rnr1D57N-Rep6	ACC	nope	>1bp-ins	G/C-1	none	G/C-1	AATTCACCGTAAT	CCGTAAT	TGG	ACC	C	none	nope	nope_ACC	G/C-1_CCGTAAT	7	FALSE	FALSE
NL3_v.txt	32842	32842-Deletion-A--	Deletion	1	A	-	9	10674	0.084317	37.4444	rnr1D57N	FALSE	CAN	JSY3602	6	rnr1D57N-Rep6	CAA	nope	>1bp-ins	A/T-1	none	A/T-1	TTACCCAAAAAAT	AAAAAAT	GTT	GTT	T	none	T>none	T>none_GTT	A/T-1_AAAAAAT	7	FALSE	FALSE
NL3_v.txt	32896	32896-Deletion-C--	Deletion	1	C	-	11	11230	0.0979519	37	rnr1D57N	FALSE	CAN	JSY3602	6	rnr1D57N-Rep6	ACT	nope	>1bp-ins	G/C-1	none	G/C-1	GAATGACTTGGCC	CTTGGCC	TGA	ACT	C	none	nope	nope_ACT	G/C-1_CTTGGCC	7	FALSE	FALSE
NL3_v.txt	32924	32924-Deletion-A--	Deletion	1	A	-	14	11230	0.124666	37.5	rnr1D57N	FALSE	CAN	JSY3602	6	rnr1D57N-Rep6	CAA	nope	>1bp-ins	A/T-1	none	A/T-1	CAGGGCAAAAGTG	AAAAGTG	GTT	GTT	T	none	T>none	T>none_GTT	A/T-1_AAAAGTG	7	FALSE	FALSE
NL3_v.txt	32941	32941-Deletion-A--	Deletion	1	A	-	15	11230	0.133571	33.7333	rnr1D57N	FALSE	CAN	JSY3602	6	rnr1D57N-Rep6	GAA	nope	>1bp-ins	A/T-1	none	A/T-1	CCCAAGAAAACCA	AAAACCA	CTT	CTT	T	none	T>none	T>none_CTT	A/T-1_AAAACCA	7	FALSE	FALSE
NL3_v.txt	33147	33147-Deletion-A--	Deletion	1	A	-	6	11230	0.0534283	39	rnr1D57N	FALSE	CAN	JSY3602	6	rnr1D57N-Rep6	GAA	nope	>1bp-ins	A/T-1	none	A/T-1	CCAATGAAAAGAC	AAAAGAC	CTT	CTT	T	none	T>none	T>none_CTT	A/T-1_AAAAGAC	7	FALSE	FALSE
NL3_v.txt	33251	33251-Deletion-A--	Deletion	1	A	-	32	11357	0.281765	61.75	rnr1D57N	FALSE	CAN	JSY3602	6	rnr1D57N-Rep6	CAC	nope	>1bp-ins	A/T-1	none	A/T-1	TTCATCACCTATG	ACCTATG	GTG	GTG	T	none	T>none	T>none_GTG	A/T-1_ACCTATG	7	FALSE	FALSE
NL3_v.txt	33445	33445-Deletion-C--	Deletion	1	C	-	9	11357	0.0792463	35.3333	rnr1D57N	FALSE	CAN	JSY3602	6	rnr1D57N-Rep6	GCG	nope	>1bp-ins	G/C-1	none	G/C-1	TGTCGGCGTCTTC	CGTCTTC	CGC	GCG	C	none	nope	nope_GCG	G/C-1_CGTCTTC	7	FALSE	FALSE
NL3_v.txt	33474	33474-Deletion-C--	Deletion	1	C	-	27	11355	0.237781	32.6667	rnr1D57N	FALSE	CAN	JSY3602	6	rnr1D57N-Rep6	GCC	nope	>1bp-ins	G/C-1	none	G/C-1	GCTATGCCTTTTT	CCTTTTT	CGG	GCC	C	none	nope	nope_GCC	G/C-1_CCTTTTT	7	FALSE	FALSE
NL4_v.txt	31723	31723-SNV-A-C	SNV	1	A	C	1	5292	0.0188964	64	rnr1D57N	FALSE	CAN	JSY3602	7	rnr1D57N-Rep7	CAA	A>C	G/C+1	A/T-1	TA>GC	TA>GC	TGTCCCAAAAAGT	AAAAAGT	GTT	GTT	T	G	T>G	T>G_GTT	TA>GC_AAAAAGT	7	FALSE	FALSE
NL4_v.txt	32256	32256-SNV-A-C	SNV	1	A	C	50	13146	0.380344	18.98	rnr1D57N	FALSE	CAN	JSY3602	7	rnr1D57N-Rep7	TAG	A>C	G/C+1	A/T-1	TA>GC	TA>GC	TTTGATAGACCAA	AGACCAA	ATC	ATC	T	G	T>G	T>G_ATC	TA>GC_AGACCAA	7	FALSE	FALSE
NL4_v.txt	32442	32442-SNV-A-C	SNV	1	A	C	21	13151	0.159684	62.1905	rnr1D57N	FALSE	CAN	JSY3602	7	rnr1D57N-Rep7	TAA	A>C	G/C+1	A/T-1	TA>GC	TA>GC	GGAACTAAAAGTC	AAAAGTC	ATT	ATT	T	G	T>G	T>G_ATT	TA>GC_AAAAGTC	7	FALSE	FALSE
NL4_v.txt	32472	32472-SNV-T-G	SNV	1	T	G	1	13151	0.0076	39	rnr1D57N	FALSE	CAN	JSY3602	7	rnr1D57N-Rep7	GTA	T>G	G/C+1	A/T-1	TA>GC	TA>GC	CCAATGTAGAAGG	TAGAAGG	CAT	GTA	T	C	T>G	T>G_GTA	TA>GC_TAGAAGG	7	FALSE	FALSE
NL4_v.txt	32481	32481-SNV-A-C	SNV	1	A	C	8	13151	0.0608319	51.5	rnr1D57N	FALSE	CAN	JSY3602	7	rnr1D57N-Rep7	TAA	A>C	G/C+1	A/T-1	TA>GC	TA>GC	AAGGTTAAGATAC	AAGATAC	ATT	ATT	T	G	T>G	T>G_ATT	TA>GC_AAGATAC	7	FALSE	FALSE
NL4_v.txt	32490	32490-SNV-A-C	SNV	1	A	C	58	13151	0.441031	37.8103	rnr1D57N	FALSE	CAN	JSY3602	7	rnr1D57N-Rep7	GAA	A>C	G/C+1	A/T-1	TA>GC	TA>GC	ATACGGAAAACAA	AAAACAA	CTT	CTT	T	G	T>G	T>G_CTT	TA>GC_AAAACAA	7	FALSE	FALSE
NL4_v.txt	33095	33095-SNV-T-G	SNV	1	T	G	7	5930	0.118044	22.1429	rnr1D57N	FALSE	CAN	JSY3602	7	rnr1D57N-Rep7	ATA	T>G	G/C+1	A/T-1	TA>GC	TA>GC	ATATGATATAAGA	TATAAGA	TAT	ATA	T	C	T>G	T>G_ATA	TA>GC_TATAAGA	7	FALSE	FALSE
NL4_v.txt	33166	33166-SNV-T-G	SNV	1	T	G	9	5928	0.151822	35.6667	rnr1D57N	FALSE	CAN	JSY3602	7	rnr1D57N-Rep7	GTA	T>G	G/C+1	A/T-1	TA>GC	TA>GC	CAATAGTACCACC	TACCACC	CAT	GTA	T	C	T>G	T>G_GTA	TA>GC_TACCACC	7	FALSE	FALSE
NL4_v.txt	33194	33194-SNV-T-G	SNV	1	T	G	15	10091	0.148647	38.2	rnr1D57N	FALSE	CAN	JSY3602	7	rnr1D57N-Rep7	GTC	T>G	G/C+1	A/T-1	TA>GC	TA>GC	AATATGTCTTTGC	TCTTTGC	CAG	GTC	T	C	T>G	T>G_GTC	TA>GC_TCTTTGC	7	FALSE	FALSE
NL4_v.txt	32256	32256-SNV-A-G	SNV	1	A	G	20	13146	0.152138	37.7	rnr1D57N	FALSE	CAN	JSY3602	7	rnr1D57N-Rep7	TAG	A>G	G/C+1	A/T-1	TA>CG	TA>CG	TTTGATAGACCAA	AGACCAA	ATC	ATC	T	C	T>C	T>C_ATC	TA>CG_AGACCAA	7	FALSE	FALSE
NL4_v.txt	32293	32293-SNV-A-G	SNV	1	A	G	10	13151	0.0760398	38.5954	rnr1D57N	FALSE	CAN	JSY3602	7	rnr1D57N-Rep7	GAA	A>G	G/C+1	A/T-1	TA>CG	TA>CG	TATTTGAATTTGC	AATTTGC	CTT	CTT	T	C	T>C	T>C_CTT	TA>CG_AATTTGC	7	FALSE	FALSE
NL4_v.txt	32472	32472-SNV-T-C	SNV	1	T	C	10	13151	0.0760398	62.7	rnr1D57N	FALSE	CAN	JSY3602	7	rnr1D57N-Rep7	GTA	T>C	G/C+1	A/T-1	TA>CG	TA>CG	CCAATGTAGAAGG	TAGAAGG	CAT	GTA	T	G	T>C	T>C_GTA	TA>CG_TAGAAGG	7	FALSE	FALSE
NL4_v.txt	32473	32473-SNV-A-G	SNV	1	A	G	6	13151	0.0456239	48.6667	rnr1D57N	FALSE	CAN	JSY3602	7	rnr1D57N-Rep7	TAG	A>G	G/C+1	A/T-1	TA>CG	TA>CG	CAATGTAGAAGGT	AGAAGGT	ATC	ATC	T	C	T>C	T>C_ATC	TA>CG_AGAAGGT	7	FALSE	FALSE
NL4_v.txt	32490	32490-SNV-A-G	SNV	1	A	G	13	13151	0.0988518	37.9231	rnr1D57N	FALSE	CAN	JSY3602	7	rnr1D57N-Rep7	GAA	A>G	G/C+1	A/T-1	TA>CG	TA>CG	ATACGGAAAACAA	AAAACAA	CTT	CTT	T	C	T>C	T>C_CTT	TA>CG_AAAACAA	7	FALSE	FALSE
NL4_v.txt	32500	32500-SNV-T-C	SNV	1	T	C	2	13151	0.015208	38.9997	rnr1D57N	FALSE	CAN	JSY3602	7	rnr1D57N-Rep7	TTT	T>C	G/C+1	A/T-1	TA>CG	TA>CG	CAACTTTTTTGAT	TTTTGAT	AAA	TTT	T	G	T>C	T>C_TTT	TA>CG_TTTTGAT	7	FALSE	FALSE
NL4_v.txt	33095	33095-SNV-T-C	SNV	1	T	C	2	5930	0.0337268	64	rnr1D57N	FALSE	CAN	JSY3602	7	rnr1D57N-Rep7	ATA	T>C	G/C+1	A/T-1	TA>CG	TA>CG	ATATGATATAAGA	TATAAGA	TAT	ATA	T	G	T>C	T>C_ATA	TA>CG_TATAAGA	7	FALSE	FALSE
NL4_v.txt	33190	33190-SNV-T-C	SNV	1	T	C	2	10092	0.0198177	37.9976	rnr1D57N	FALSE	CAN	JSY3602	7	rnr1D57N-Rep7	ATA	T>C	G/C+1	A/T-1	TA>CG	TA>CG	TACCAATATGTCT	TATGTCT	TAT	ATA	T	G	T>C	T>C_ATA	TA>CG_TATGTCT	7	FALSE	FALSE
NL4_v.txt	33211	33211-SNV-T-C	SNV	1	T	C	31	10091	0.307204	37.9677	rnr1D57N	FALSE	CAN	JSY3602	7	rnr1D57N-Rep7	CTC	T>C	G/C+1	A/T-1	TA>CG	TA>CG	GCTCTCTCTTCAC	TCTTCAC	GAG	CTC	T	G	T>C	T>C_CTC	TA>CG_TCTTCAC	7	FALSE	FALSE
NL4_v.txt	31839	31839-SNV-A-T	SNV	1	A	T	16	5292	0.302343	60.8125	rnr1D57N	FALSE	CAN	JSY3602	7	rnr1D57N-Rep7	TAA	A>T	A/T+1	A/T-1	TA>AT	TA>AT	TGAAATAAGATCC	AAGATCC	ATT	ATT	T	A	T>A	T>A_ATT	TA>AT_AAGATCC	7	FALSE	FALSE
NL4_v.txt	31886	31886-SNV-A-T	SNV	1	A	T	8	5292	0.151172	36.1193	rnr1D57N	FALSE	CAN	JSY3602	7	rnr1D57N-Rep7	CAA	A>T	A/T+1	A/T-1	TA>AT	TA>AT	GGCAGCAAAGCTA	AAAGCTA	GTT	GTT	T	A	T>A	T>A_GTT	TA>AT_AAAGCTA	7	FALSE	FALSE
NL4_v.txt	32050	32050-SNV-T-A	SNV	1	T	A	4	1937	0.206505	64	rnr1D57N	FALSE	CAN	JSY3602	7	rnr1D57N-Rep7	CTG	T>A	A/T+1	A/T-1	TA>AT	TA>AT	TAAATCTGATGTG	TGATGTG	GAC	CTG	T	T	T>A	T>A_CTG	TA>AT_TGATGTG	7	FALSE	FALSE
NL4_v.txt	32473	32473-SNV-A-T	SNV	1	A	T	12	13151	0.0912478	54.6667	rnr1D57N	FALSE	CAN	JSY3602	7	rnr1D57N-Rep7	TAG	A>T	A/T+1	A/T-1	TA>AT	TA>AT	CAATGTAGAAGGT	AGAAGGT	ATC	ATC	T	A	T>A	T>A_ATC	TA>AT_AGAAGGT	7	FALSE	FALSE
NL4_v.txt	32499	32499-SNV-T-A	SNV	1	T	A	1	13151	0.0076	38.9993	rnr1D57N	FALSE	CAN	JSY3602	7	rnr1D57N-Rep7	TTT	T>A	A/T+1	A/T-1	TA>AT	TA>AT	ACAACTTTTTTGA	TTTTTGA	AAA	TTT	T	T	T>A	T>A_TTT	TA>AT_TTTTTGA	7	FALSE	FALSE
NL4_v.txt	32823	32823-SNV-A-T	SNV	1	A	T	21	3997	0.525394	37.5238	rnr1D57N	FALSE	CAN	JSY3602	7	rnr1D57N-Rep7	CAT	A>T	A/T+1	A/T-1	TA>AT	TA>AT	AAGTTCATTATTG	ATTATTG	GTA	GTA	T	A	T>A	T>A_GTA	TA>AT_ATTATTG	7	FALSE	FALSE
NL4_v.txt	33108	33108-SNV-A-T	SNV	1	A	T	2	5930	0.0337268	37.5	rnr1D57N	FALSE	CAN	JSY3602	7	rnr1D57N-Rep7	CAC	A>T	A/T+1	A/T-1	TA>AT	TA>AT	GCGCCCACTGGGC	ACTGGGC	GTG	GTG	T	A	T>A	T>A_GTG	TA>AT_ACTGGGC	7	FALSE	FALSE
NL4_v.txt	33236	33236-SNV-T-A	SNV	1	T	A	2	10091	0.0198196	38.4897	rnr1D57N	FALSE	CAN	JSY3602	7	rnr1D57N-Rep7	CTC	T>A	A/T+1	A/T-1	TA>AT	TA>AT	TACTTCTCCTTCA	TCCTTCA	GAG	CTC	T	T	T>A	T>A_CTC	TA>AT_TCCTTCA	7	FALSE	FALSE
NL4_v.txt	31650	31650-SNV-C-T	SNV	1	C	T	12	5291	0.2268	35	rnr1D57N	FALSE	CAN	JSY3602	7	rnr1D57N-Rep7	GCG	C>T	A/T+1	G/C-1	CG>TA	CG>TA	AGAATGCGAAATG	CGAAATG	CGC	GCG	C	A	C>T	C>T_GCG	CG>TA_CGAAATG	7	FALSE	FALSE
NL4_v.txt	31880	31880-SNV-G-A	SNV	1	G	A	34	5292	0.642479	35.6765	rnr1D57N	FALSE	CAN	JSY3602	7	rnr1D57N-Rep7	CGG	G>A	A/T+1	G/C-1	CG>TA	CG>TA	ATAGGCGGCAGCA	GGCAGCA	GCC	GCC	C	T	C>T	C>T_GCC	CG>TA_GGCAGCA	7	FALSE	FALSE
NL4_v.txt	31884	31884-SNV-G-A	SNV	1	G	A	7	5292	0.132275	35.5696	rnr1D57N	FALSE	CAN	JSY3602	7	rnr1D57N-Rep7	AGC	G>A	A/T+1	G/C-1	CG>TA	CG>TA	GCGGCAGCAAAGC	GCAAAGC	TCG	TCG	C	T	C>T	C>T_TCG	CG>TA_GCAAAGC	7	FALSE	FALSE
NL4_v.txt	32041	32041-SNV-G-A	SNV	1	G	A	6	1937	0.309757	61	rnr1D57N	FALSE	CAN	JSY3602	7	rnr1D57N-Rep7	TGC	G>A	A/T+1	G/C-1	CG>TA	CG>TA	AAGCTTGCATAAA	GCATAAA	ACG	ACG	C	T	C>T	C>T_ACG	CG>TA_GCATAAA	7	FALSE	FALSE
NL4_v.txt	32075	32075-SNV-C-T	SNV	1	C	T	8	1937	0.41301	64	rnr1D57N	FALSE	CAN	JSY3602	7	rnr1D57N-Rep7	ACC	C>T	A/T+1	G/C-1	CG>TA	CG>TA	AAATAACCATGCA	CCATGCA	TGG	ACC	C	A	C>T	C>T_ACC	CG>TA_CCATGCA	7	FALSE	FALSE
NL4_v.txt	32271	32271-SNV-C-T	SNV	1	C	T	15	13151	0.11406	37.2667	rnr1D57N	FALSE	CAN	JSY3602	7	rnr1D57N-Rep7	ACG	C>T	A/T+1	G/C-1	CG>TA	CG>TA	AAAATACGGGAAC	CGGGAAC	TGC	ACG	C	A	C>T	C>T_ACG	CG>TA_CGGGAAC	7	FALSE	FALSE
NL4_v.txt	32299	32299-SNV-C-T	SNV	1	C	T	31	13151	0.235724	36.3548	rnr1D57N	FALSE	CAN	JSY3602	7	rnr1D57N-Rep7	GCG	C>T	A/T+1	G/C-1	CG>TA	CG>TA	AATTTGCGGCAGA	CGGCAGA	CGC	GCG	C	A	C>T	C>T_GCG	CG>TA_CGGCAGA	7	FALSE	FALSE
NL4_v.txt	32466	32466-SNV-C-T	SNV	1	C	T	13	13151	0.0988518	62.2308	rnr1D57N	FALSE	CAN	JSY3602	7	rnr1D57N-Rep7	GCC	C>T	A/T+1	G/C-1	CG>TA	CG>TA	AGAGAGCCAATGT	CCAATGT	CGG	GCC	C	A	C>T	C>T_GCC	CG>TA_CCAATGT	7	FALSE	FALSE
NL4_v.txt	32487	32487-SNV-C-T	SNV	1	C	T	8	13151	0.0608319	36.125	rnr1D57N	FALSE	CAN	JSY3602	7	rnr1D57N-Rep7	ACG	C>T	A/T+1	G/C-1	CG>TA	CG>TA	AAGATACGGAAAA	CGGAAAA	TGC	ACG	C	A	C>T	C>T_ACG	CG>TA_CGGAAAA	7	FALSE	FALSE
NL4_v.txt	32535	32535-SNV-G-A	SNV	1	G	A	15	13147	0.114094	38.5333	rnr1D57N	FALSE	CAN	JSY3602	7	rnr1D57N-Rep7	TGC	G>A	A/T+1	G/C-1	CG>TA	CG>TA	GGGTTTGCAGCTT	GCAGCTT	ACG	ACG	C	T	C>T	C>T_ACG	CG>TA_GCAGCTT	7	FALSE	FALSE
NL4_v.txt	32572	32572-SNV-C-T	SNV	1	C	T	12	3968	0.302419	37.25	rnr1D57N	FALSE	CAN	JSY3602	7	rnr1D57N-Rep7	CCT	C>T	A/T+1	G/C-1	CG>TA	CG>TA	CAGTACCTTGAAA	CTTGAAA	GGA	CCT	C	A	C>T	C>T_CCT	CG>TA_CTTGAAA	7	FALSE	FALSE
NL4_v.txt	32575	32575-SNV-G-A	SNV	1	G	A	3	3968	0.0756048	38.9809	rnr1D57N	FALSE	CAN	JSY3602	7	rnr1D57N-Rep7	TGA	G>A	A/T+1	G/C-1	CG>TA	CG>TA	TACCTTGAAATGT	GAAATGT	ACT	ACT	C	T	C>T	C>T_ACT	CG>TA_GAAATGT	7	FALSE	FALSE
NL4_v.txt	32749	32749-SNV-C-T	SNV	1	C	T	12	3997	0.300225	61.75	rnr1D57N	FALSE	CAN	JSY3602	7	rnr1D57N-Rep7	CCG	C>T	A/T+1	G/C-1	CG>TA	CG>TA	GAAACCCGATAAT	CGATAAT	GGC	CCG	C	A	C>T	C>T_CCG	CG>TA_CGATAAT	7	FALSE	FALSE
NL4_v.txt	32797	32797-SNV-C-T	SNV	1	C	T	15	3997	0.375281	36.9333	rnr1D57N	FALSE	CAN	JSY3602	7	rnr1D57N-Rep7	CCG	C>T	A/T+1	G/C-1	CG>TA	CG>TA	ATTCACCGTAATA	CGTAATA	GGC	CCG	C	A	C>T	C>T_CCG	CG>TA_CGTAATA	7	FALSE	FALSE
NL4_v.txt	32798	32798-SNV-G-A	SNV	1	G	A	4	3997	0.100075	38.75	rnr1D57N	FALSE	CAN	JSY3602	7	rnr1D57N-Rep7	CGT	G>A	A/T+1	G/C-1	CG>TA	CG>TA	TTCACCGTAATAT	GTAATAT	GCA	GCA	C	T	C>T	C>T_GCA	CG>TA_GTAATAT	7	FALSE	FALSE
NL4_v.txt	32882	32882-SNV-C-T	SNV	1	C	T	12	5930	0.202361	36.657	rnr1D57N	FALSE	CAN	JSY3602	7	rnr1D57N-Rep7	TCC	C>T	A/T+1	G/C-1	CG>TA	CG>TA	GTACGTCCAAAAT	CCAAAAT	AGG	TCC	C	A	C>T	C>T_TCC	CG>TA_CCAAAAT	7	FALSE	FALSE
NL4_v.txt	32883	32883-SNV-C-T	SNV	1	C	T	10	5930	0.168634	36.3983	rnr1D57N	FALSE	CAN	JSY3602	7	rnr1D57N-Rep7	CCA	C>T	A/T+1	G/C-1	CG>TA	CG>TA	TACGTCCAAAATT	CAAAATT	GGT	CCA	C	A	C>T	C>T_CCA	CG>TA_CAAAATT	7	FALSE	FALSE
NL4_v.txt	32890	32890-SNV-G-A	SNV	1	G	A	16	5930	0.269815	38.875	rnr1D57N	FALSE	CAN	JSY3602	7	rnr1D57N-Rep7	TGA	G>A	A/T+1	G/C-1	CG>TA	CG>TA	AAAATTGAATGAC	GAATGAC	ACT	ACT	C	T	C>T	C>T_ACT	CG>TA_GAATGAC	7	FALSE	FALSE
NL4_v.txt	32899	32899-SNV-G-A	SNV	1	G	A	20	5930	0.337268	38.85	rnr1D57N	FALSE	CAN	JSY3602	7	rnr1D57N-Rep7	TGG	G>A	A/T+1	G/C-1	CG>TA	CG>TA	TGACTTGGCCAAC	GGCCAAC	ACC	ACC	C	T	C>T	C>T_ACC	CG>TA_GGCCAAC	7	FALSE	FALSE
NL4_v.txt	32901	32901-SNV-C-T	SNV	1	C	T	10	5930	0.168634	39	rnr1D57N	FALSE	CAN	JSY3602	7	rnr1D57N-Rep7	GCC	C>T	A/T+1	G/C-1	CG>TA	CG>TA	ACTTGGCCAACTA	CCAACTA	CGG	GCC	C	A	C>T	C>T_GCC	CG>TA_CCAACTA	7	FALSE	FALSE
NL4_v.txt	32995	32995-SNV-G-A	SNV	1	G	A	31	5930	0.522766	63.4516	rnr1D57N	FALSE	CAN	JSY3602	7	rnr1D57N-Rep7	TGT	G>A	A/T+1	G/C-1	CG>TA	CG>TA	ATCTTTGTGAGAA	GTGAGAA	ACA	ACA	C	T	C>T	C>T_ACA	CG>TA_GTGAGAA	7	FALSE	FALSE
NL4_v.txt	33043	33043-SNV-C-T	SNV	1	C	T	8	5930	0.134907	62.25	rnr1D57N	FALSE	CAN	JSY3602	7	rnr1D57N-Rep7	TCA	C>T	A/T+1	G/C-1	CG>TA	CG>TA	CCATTTCACCCAA	CACCCAA	AGT	TCA	C	A	C>T	C>T_TCA	CG>TA_CACCCAA	7	FALSE	FALSE
NL4_v.txt	33070	33070-SNV-C-T	SNV	1	C	T	4	5930	0.0674536	64	rnr1D57N	FALSE	CAN	JSY3602	7	rnr1D57N-Rep7	GCC	C>T	A/T+1	G/C-1	CG>TA	CG>TA	AATATGCCAAAGA	CCAAAGA	CGG	GCC	C	A	C>T	C>T_GCC	CG>TA_CCAAAGA	7	FALSE	FALSE
NL4_v.txt	33114	33114-SNV-C-T	SNV	1	C	T	5	5930	0.084317	37.4	rnr1D57N	FALSE	CAN	JSY3602	7	rnr1D57N-Rep7	GCC	C>T	A/T+1	G/C-1	CG>TA	CG>TA	ACTGGGCCGGCGT	CCGGCGT	CGG	GCC	C	A	C>T	C>T_GCC	CG>TA_CCGGCGT	7	FALSE	FALSE
NL4_v.txt	33153	33153-SNV-C-T	SNV	1	C	T	7	5930	0.118044	38.8567	rnr1D57N	FALSE	CAN	JSY3602	7	rnr1D57N-Rep7	ACC	C>T	A/T+1	G/C-1	CG>TA	CG>TA	AAAAGACCTGTAC	CCTGTAC	TGG	ACC	C	A	C>T	C>T_ACC	CG>TA_CCTGTAC	7	FALSE	FALSE
NL4_v.txt	33168	33168-SNV-C-T	SNV	1	C	T	6	5928	0.101215	35.3333	rnr1D57N	FALSE	CAN	JSY3602	7	rnr1D57N-Rep7	ACC	C>T	A/T+1	G/C-1	CG>TA	CG>TA	ATAGTACCACCAA	CCACCAA	TGG	ACC	C	A	C>T	C>T_ACC	CG>TA_CCACCAA	7	FALSE	FALSE
NL4_v.txt	33258	33258-SNV-C-T	SNV	1	C	T	14	10091	0.138737	54.3571	rnr1D57N	FALSE	CAN	JSY3602	7	rnr1D57N-Rep7	GCC	C>T	A/T+1	G/C-1	CG>TA	CG>TA	CCTATGCCATCCT	CCATCCT	CGG	GCC	C	A	C>T	C>T_GCC	CG>TA_CCATCCT	7	FALSE	FALSE
NL4_v.txt	33365	33365-SNV-G-A	SNV	1	G	A	2	10089	0.0198236	56.5	rnr1D57N	FALSE	CAN	JSY3602	7	rnr1D57N-Rep7	TGT	G>A	A/T+1	G/C-1	CG>TA	CG>TA	ACGTCTGTGGTGT	GTGGTGT	ACA	ACA	C	T	C>T	C>T_ACA	CG>TA_GTGGTGT	7	FALSE	FALSE
NL4_v.txt	33392	33392-SNV-G-A	SNV	1	G	A	9	10091	0.0891884	58.5556	rnr1D57N	FALSE	CAN	JSY3602	7	rnr1D57N-Rep7	CGT	G>A	A/T+1	G/C-1	CG>TA	CG>TA	AACGTCGTGAAAG	GTGAAAG	GCA	GCA	C	T	C>T	C>T_GCA	CG>TA_GTGAAAG	7	FALSE	FALSE
NL4_v.txt	33412	33412-SNV-G-A	SNV	1	G	A	13	10091	0.128828	55.4615	rnr1D57N	FALSE	CAN	JSY3602	7	rnr1D57N-Rep7	GGC	G>A	A/T+1	G/C-1	CG>TA	CG>TA	TGACCGGCTCATT	GCTCATT	CCG	CCG	C	T	C>T	C>T_CCG	CG>TA_GCTCATT	7	FALSE	FALSE
NL4_v.txt	33474	33474-SNV-C-T	SNV	1	C	T	11	10090	0.109019	31	rnr1D57N	FALSE	CAN	JSY3602	7	rnr1D57N-Rep7	GCC	C>T	A/T+1	G/C-1	CG>TA	CG>TA	GCTATGCCTTTTT	CCTTTTT	CGG	GCC	C	A	C>T	C>T_GCC	CG>TA_CCTTTTT	7	FALSE	FALSE
NL4_v.txt	31661	31661-SNV-G-C	SNV	1	G	C	8	5292	0.151172	34	rnr1D57N	FALSE	CAN	JSY3602	7	rnr1D57N-Rep7	TGG	G>C	G/C+1	G/C-1	CG>GC	CG>GC	TGGCGTGGAAATG	GGAAATG	ACC	ACC	C	G	C>G	C>G_ACC	CG>GC_GGAAATG	7	FALSE	FALSE
NL4_v.txt	32271	32271-SNV-C-G	SNV	1	C	G	9	13151	0.0684359	37.7778	rnr1D57N	FALSE	CAN	JSY3602	7	rnr1D57N-Rep7	ACG	C>G	G/C+1	G/C-1	CG>GC	CG>GC	AAAATACGGGAAC	CGGGAAC	TGC	ACG	C	C	C>G	C>G_ACG	CG>GC_CGGGAAC	7	FALSE	FALSE
NL4_v.txt	32292	32292-SNV-G-C	SNV	1	G	C	52	13151	0.395407	38.5385	rnr1D57N	FALSE	CAN	JSY3602	7	rnr1D57N-Rep7	TGA	G>C	G/C+1	G/C-1	CG>GC	CG>GC	ATATTTGAATTTG	GAATTTG	ACT	ACT	C	G	C>G	C>G_ACT	CG>GC_GAATTTG	7	FALSE	FALSE
NL4_v.txt	32432	32432-SNV-G-C	SNV	1	G	C	8	13151	0.0608319	58.5	rnr1D57N	FALSE	CAN	JSY3602	7	rnr1D57N-Rep7	TGT	G>C	G/C+1	G/C-1	CG>GC	CG>GC	GTCATTGTATGGA	GTATGGA	ACA	ACA	C	G	C>G	C>G_ACA	CG>GC_GTATGGA	7	FALSE	FALSE
NL4_v.txt	32474	32474-SNV-G-C	SNV	1	G	C	4	13151	0.0304159	54.9959	rnr1D57N	FALSE	CAN	JSY3602	7	rnr1D57N-Rep7	AGA	G>C	G/C+1	G/C-1	CG>GC	CG>GC	AATGTAGAAGGTT	GAAGGTT	TCT	TCT	C	G	C>G	C>G_TCT	CG>GC_GAAGGTT	7	FALSE	FALSE
NL4_v.txt	32487	32487-SNV-C-G	SNV	1	C	G	6	13151	0.0456239	39	rnr1D57N	FALSE	CAN	JSY3602	7	rnr1D57N-Rep7	ACG	C>G	G/C+1	G/C-1	CG>GC	CG>GC	AAGATACGGAAAA	CGGAAAA	TGC	ACG	C	C	C>G	C>G_ACG	CG>GC_CGGAAAA	7	FALSE	FALSE
NL4_v.txt	32776	32776-SNV-C-G	SNV	1	C	G	5	3997	0.125094	50.6	rnr1D57N	FALSE	CAN	JSY3602	7	rnr1D57N-Rep7	GCG	C>G	G/C+1	G/C-1	CG>GC	CG>GC	TGGAAGCGACCCA	CGACCCA	CGC	GCG	C	C	C>G	C>G_GCG	CG>GC_CGACCCA	7	FALSE	FALSE
NL4_v.txt	32796	32796-SNV-C-G	SNV	1	C	G	1	3997	0.0250188	38	rnr1D57N	FALSE	CAN	JSY3602	7	rnr1D57N-Rep7	ACC	C>G	G/C+1	G/C-1	CG>GC	CG>GC	AATTCACCGTAAT	CCGTAAT	TGG	ACC	C	C	C>G	C>G_ACC	CG>GC_CCGTAAT	7	FALSE	FALSE
NL4_v.txt	32917	32917-SNV-C-G	SNV	1	C	G	3	5930	0.0505902	39	rnr1D57N	FALSE	CAN	JSY3602	7	rnr1D57N-Rep7	TCC	C>G	G/C+1	G/C-1	CG>GC	CG>GC	TAAGTTCCAGGGC	CCAGGGC	AGG	TCC	C	C	C>G	C>G_TCC	CG>GC_CCAGGGC	7	FALSE	FALSE
NL4_v.txt	32937	32937-SNV-C-G	SNV	1	C	G	12	5930	0.202361	37.4167	rnr1D57N	FALSE	CAN	JSY3602	7	rnr1D57N-Rep7	CCA	C>G	G/C+1	G/C-1	CG>GC	CG>GC	ATTGCCCAAGAAA	CAAGAAA	GGT	CCA	C	C	C>G	C>G_CCA	CG>GC_CAAGAAA	7	FALSE	FALSE
NL4_v.txt	32997	32997-SNV-G-C	SNV	1	G	C	17	5930	0.286678	64	rnr1D57N	FALSE	CAN	JSY3602	7	rnr1D57N-Rep7	TGA	G>C	G/C+1	G/C-1	CG>GC	CG>GC	CTTTGTGAGAAAA	GAGAAAA	ACT	ACT	C	G	C>G	C>G_ACT	CG>GC_GAGAAAA	7	FALSE	FALSE
NL4_v.txt	33111	33111-SNV-G-C	SNV	1	G	C	4	5930	0.0674536	38	rnr1D57N	FALSE	CAN	JSY3602	7	rnr1D57N-Rep7	TGG	G>C	G/C+1	G/C-1	CG>GC	CG>GC	CCCACTGGGCCGG	GGGCCGG	ACC	ACC	C	G	C>G	C>G_ACC	CG>GC_GGGCCGG	7	FALSE	FALSE
NL4_v.txt	33114	33114-SNV-C-G	SNV	1	C	G	3	5930	0.0505902	38	rnr1D57N	FALSE	CAN	JSY3602	7	rnr1D57N-Rep7	GCC	C>G	G/C+1	G/C-1	CG>GC	CG>GC	ACTGGGCCGGCGT	CCGGCGT	CGG	GCC	C	C	C>G	C>G_GCC	CG>GC_CCGGCGT	7	FALSE	FALSE
NL4_v.txt	33153	33153-SNV-C-G	SNV	1	C	G	7	5930	0.118044	35.1418	rnr1D57N	FALSE	CAN	JSY3602	7	rnr1D57N-Rep7	ACC	C>G	G/C+1	G/C-1	CG>GC	CG>GC	AAAAGACCTGTAC	CCTGTAC	TGG	ACC	C	C	C>G	C>G_ACC	CG>GC_CCTGTAC	7	FALSE	FALSE
NL4_v.txt	33168	33168-SNV-C-G	SNV	1	C	G	5	5928	0.0843455	39	rnr1D57N	FALSE	CAN	JSY3602	7	rnr1D57N-Rep7	ACC	C>G	G/C+1	G/C-1	CG>GC	CG>GC	ATAGTACCACCAA	CCACCAA	TGG	ACC	C	C	C>G	C>G_ACC	CG>GC_CCACCAA	7	FALSE	FALSE
NL4_v.txt	33275	33275-SNV-C-G	SNV	1	C	G	4	10091	0.0396393	64	rnr1D57N	FALSE	CAN	JSY3602	7	rnr1D57N-Rep7	ACG	C>G	G/C+1	G/C-1	CG>GC	CG>GC	AGAGAACGTATCC	CGTATCC	TGC	ACG	C	C	C>G	C>G_ACG	CG>GC_CGTATCC	7	FALSE	FALSE
NL4_v.txt	33367	33367-SNV-G-C	SNV	1	G	C	1	10091	0.00991	64	rnr1D57N	FALSE	CAN	JSY3602	7	rnr1D57N-Rep7	TGG	G>C	G/C+1	G/C-1	CG>GC	CG>GC	GTCTGTGGTGTGT	GGTGTGT	ACC	ACC	C	G	C>G	C>G_ACC	CG>GC_GGTGTGT	7	FALSE	FALSE
NL4_v.txt	32292	32292-SNV-G-T	SNV	1	G	T	5	13151	0.0380199	35.2	rnr1D57N	FALSE	CAN	JSY3602	7	rnr1D57N-Rep7	TGA	G>T	A/T+1	G/C-1	CG>AT	CG>AT	ATATTTGAATTTG	GAATTTG	ACT	ACT	C	A	C>A	C>A_ACT	CG>AT_GAATTTG	7	FALSE	FALSE
NL4_v.txt	32301	32301-SNV-G-T	SNV	1	G	T	13	13151	0.0988518	35.5385	rnr1D57N	FALSE	CAN	JSY3602	7	rnr1D57N-Rep7	GGC	G>T	A/T+1	G/C-1	CG>AT	CG>AT	TTTGCGGCAGAAA	GCAGAAA	CCG	CCG	C	A	C>A	C>A_CCG	CG>AT_GCAGAAA	7	FALSE	FALSE
NL4_v.txt	32373	32373-SNV-G-T	SNV	1	G	T	9	13151	0.0684359	64	rnr1D57N	FALSE	CAN	JSY3602	7	rnr1D57N-Rep7	AGC	G>T	A/T+1	G/C-1	CG>AT	CG>AT	TCAATAGCAATAA	GCAATAA	TCG	TCG	C	A	C>A	C>A_TCG	CG>AT_GCAATAA	7	FALSE	FALSE
NL4_v.txt	32399	32399-SNV-G-T	SNV	1	G	T	44	13151	0.334575	62.1364	rnr1D57N	FALSE	CAN	JSY3602	7	rnr1D57N-Rep7	CGT	G>T	A/T+1	G/C-1	CG>AT	CG>AT	AGAAACGTAGGAA	GTAGGAA	GCA	GCA	C	A	C>A	C>A_GCA	CG>AT_GTAGGAA	7	FALSE	FALSE
NL4_v.txt	32432	32432-SNV-G-T	SNV	1	G	T	6	13151	0.0456239	59.5	rnr1D57N	FALSE	CAN	JSY3602	7	rnr1D57N-Rep7	TGT	G>T	A/T+1	G/C-1	CG>AT	CG>AT	GTCATTGTATGGA	GTATGGA	ACA	ACA	C	A	C>A	C>A_ACA	CG>AT_GTATGGA	7	FALSE	FALSE
NL4_v.txt	32471	32471-SNV-G-T	SNV	1	G	T	1705	13151	12.9648	60.9584	rnr1D57N	FALSE	CAN	JSY3602	7	rnr1D57N-Rep7	TGT	G>T	A/T+1	G/C-1	CG>AT	CG>AT	GCCAATGTAGAAG	GTAGAAG	ACA	ACA	C	A	C>A	C>A_ACA	CG>AT_GTAGAAG	7	FALSE	FALSE
NL4_v.txt	32474	32474-SNV-G-T	SNV	1	G	T	4	13151	0.0304159	55.2449	rnr1D57N	FALSE	CAN	JSY3602	7	rnr1D57N-Rep7	AGA	G>T	A/T+1	G/C-1	CG>AT	CG>AT	AATGTAGAAGGTT	GAAGGTT	TCT	TCT	C	A	C>A	C>A_TCT	CG>AT_GAAGGTT	7	FALSE	FALSE
NL4_v.txt	32494	32494-SNV-C-A	SNV	1	C	A	6	13151	0.0456239	37.8333	rnr1D57N	FALSE	CAN	JSY3602	7	rnr1D57N-Rep7	ACA	C>A	A/T+1	G/C-1	CG>AT	CG>AT	GGAAAACAACTTT	CAACTTT	TGT	ACA	C	T	C>A	C>A_ACA	CG>AT_CAACTTT	7	FALSE	FALSE
NL4_v.txt	32575	32575-SNV-G-T	SNV	1	G	T	40	3968	1.00806	37.1708	rnr1D57N	FALSE	CAN	JSY3602	7	rnr1D57N-Rep7	TGA	G>T	A/T+1	G/C-1	CG>AT	CG>AT	TACCTTGAAATGT	GAAATGT	ACT	ACT	C	A	C>A	C>A_ACT	CG>AT_GAAATGT	7	FALSE	FALSE
NL4_v.txt	32629	32629-SNV-C-A	SNV	1	C	A	7	3968	0.176411	39	rnr1D57N	FALSE	CAN	JSY3602	7	rnr1D57N-Rep7	TCG	C>A	A/T+1	G/C-1	CG>AT	CG>AT	TCCCTTCGTTTTT	CGTTTTT	AGC	TCG	C	T	C>A	C>A_TCG	CG>AT_CGTTTTT	7	FALSE	FALSE
NL4_v.txt	32796	32796-SNV-C-A	SNV	1	C	A	37	3997	0.925694	37.7297	rnr1D57N	FALSE	CAN	JSY3602	7	rnr1D57N-Rep7	ACC	C>A	A/T+1	G/C-1	CG>AT	CG>AT	AATTCACCGTAAT	CCGTAAT	TGG	ACC	C	T	C>A	C>A_ACC	CG>AT_CCGTAAT	7	FALSE	FALSE
NL4_v.txt	32797	32797-SNV-C-A	SNV	1	C	A	5	3997	0.125094	38.6	rnr1D57N	FALSE	CAN	JSY3602	7	rnr1D57N-Rep7	CCG	C>A	A/T+1	G/C-1	CG>AT	CG>AT	ATTCACCGTAATA	CGTAATA	GGC	CCG	C	T	C>A	C>A_CCG	CG>AT_CGTAATA	7	FALSE	FALSE
NL4_v.txt	32798	32798-SNV-G-T	SNV	1	G	T	11	3997	0.275206	35.9091	rnr1D57N	FALSE	CAN	JSY3602	7	rnr1D57N-Rep7	CGT	G>T	A/T+1	G/C-1	CG>AT	CG>AT	TTCACCGTAATAT	GTAATAT	GCA	GCA	C	A	C>A	C>A_GCA	CG>AT_GTAATAT	7	FALSE	FALSE
NL4_v.txt	32917	32917-SNV-C-A	SNV	1	C	A	13	5930	0.219224	37.0769	rnr1D57N	FALSE	CAN	JSY3602	7	rnr1D57N-Rep7	TCC	C>A	A/T+1	G/C-1	CG>AT	CG>AT	TAAGTTCCAGGGC	CCAGGGC	AGG	TCC	C	T	C>A	C>A_TCC	CG>AT_CCAGGGC	7	FALSE	FALSE
NL4_v.txt	33043	33043-SNV-C-A	SNV	1	C	A	8	5930	0.134907	58.375	rnr1D57N	FALSE	CAN	JSY3602	7	rnr1D57N-Rep7	TCA	C>A	A/T+1	G/C-1	CG>AT	CG>AT	CCATTTCACCCAA	CACCCAA	AGT	TCA	C	T	C>A	C>A_TCA	CG>AT_CACCCAA	7	FALSE	FALSE
NL4_v.txt	33051	33051-SNV-G-T	SNV	1	G	T	14	5930	0.236088	63.8571	rnr1D57N	FALSE	CAN	JSY3602	7	rnr1D57N-Rep7	GGA	G>T	A/T+1	G/C-1	CG>AT	CG>AT	CCCAAGGACTGCG	GACTGCG	CCT	CCT	C	A	C>A	C>A_CCT	CG>AT_GACTGCG	7	FALSE	FALSE
NL4_v.txt	33151	33151-SNV-G-T	SNV	1	G	T	38	5930	0.640809	36.5263	rnr1D57N	FALSE	CAN	JSY3602	7	rnr1D57N-Rep7	AGA	G>T	A/T+1	G/C-1	CG>AT	CG>AT	TGAAAAGACCTGT	GACCTGT	TCT	TCT	C	A	C>A	C>A_TCT	CG>AT_GACCTGT	7	FALSE	FALSE
NL4_v.txt	33154	33154-SNV-C-A	SNV	1	C	A	9	5928	0.151822	30.1064	rnr1D57N	FALSE	CAN	JSY3602	7	rnr1D57N-Rep7	CCT	C>A	A/T+1	G/C-1	CG>AT	CG>AT	AAAGACCTGTACC	CTGTACC	GGA	CCT	C	T	C>A	C>A_CCT	CG>AT_CTGTACC	7	FALSE	FALSE
NL4_v.txt	33160	33160-SNV-C-A	SNV	1	C	A	13	5928	0.219298	38.7692	rnr1D57N	FALSE	CAN	JSY3602	7	rnr1D57N-Rep7	CCA	C>A	A/T+1	G/C-1	CG>AT	CG>AT	CTGTACCAATAGT	CAATAGT	GGT	CCA	C	T	C>A	C>A_CCA	CG>AT_CAATAGT	7	FALSE	FALSE
NL4_v.txt	33168	33168-SNV-C-A	SNV	1	C	A	6	5928	0.101215	38.1667	rnr1D57N	FALSE	CAN	JSY3602	7	rnr1D57N-Rep7	ACC	C>A	A/T+1	G/C-1	CG>AT	CG>AT	ATAGTACCACCAA	CCACCAA	TGG	ACC	C	T	C>A	C>A_ACC	CG>AT_CCACCAA	7	FALSE	FALSE
NL4_v.txt	33235	33235-SNV-C-A	SNV	1	C	A	21	10091	0.208106	38.9524	rnr1D57N	FALSE	CAN	JSY3602	7	rnr1D57N-Rep7	TCT	C>A	A/T+1	G/C-1	CG>AT	CG>AT	GTACTTCTCCTTC	CTCCTTC	AGA	TCT	C	T	C>A	C>A_TCT	CG>AT_CTCCTTC	7	FALSE	FALSE
NL4_v.txt	33354	33354-SNV-G-T	SNV	1	G	T	33	10091	0.327024	57.2727	rnr1D57N	FALSE	CAN	JSY3602	7	rnr1D57N-Rep7	TGA	G>T	A/T+1	G/C-1	CG>AT	CG>AT	GGTATTGACCCAC	GACCCAC	ACT	ACT	C	A	C>A	C>A_ACT	CG>AT_GACCCAC	7	FALSE	FALSE
NL4_v.txt	33365	33365-SNV-G-T	SNV	1	G	T	6	10089	0.0594707	32.956	rnr1D57N	FALSE	CAN	JSY3602	7	rnr1D57N-Rep7	TGT	G>T	A/T+1	G/C-1	CG>AT	CG>AT	ACGTCTGTGGTGT	GTGGTGT	ACA	ACA	C	A	C>A	C>A_ACA	CG>AT_GTGGTGT	7	FALSE	FALSE
NL4_v.txt	33367	33367-SNV-G-T	SNV	1	G	T	4	10091	0.0396393	48.3352	rnr1D57N	FALSE	CAN	JSY3602	7	rnr1D57N-Rep7	TGG	G>T	A/T+1	G/C-1	CG>AT	CG>AT	GTCTGTGGTGTGT	GGTGTGT	ACC	ACC	C	A	C>A	C>A_ACC	CG>AT_GGTGTGT	7	FALSE	FALSE
NL4_v.txt	33370	33370-SNV-G-T	SNV	1	G	T	1	10087	0.00991	13	rnr1D57N	FALSE	CAN	JSY3602	7	rnr1D57N-Rep7	TGT	G>T	A/T+1	G/C-1	CG>AT	CG>AT	TGTGGTGTGTTTG	GTGTTTG	ACA	ACA	C	A	C>A	C>A_ACA	CG>AT_GTGTTTG	7	FALSE	FALSE
NL4_v.txt	33372	33372-SNV-G-T	SNV	1	G	T	6	10091	0.0594589	20.9998	rnr1D57N	FALSE	CAN	JSY3602	7	rnr1D57N-Rep7	TGT	G>T	A/T+1	G/C-1	CG>AT	CG>AT	TGGTGTGTTTGTG	GTTTGTG	ACA	ACA	C	A	C>A	C>A_ACA	CG>AT_GTTTGTG	7	FALSE	FALSE
NL4_v.txt	33456	33456-SNV-G-T	SNV	1	G	T	19	10090	0.188305	28.3684	rnr1D57N	FALSE	CAN	JSY3602	7	rnr1D57N-Rep7	TGA	G>T	A/T+1	G/C-1	CG>AT	CG>AT	TCTTTTGAATTTG	GAATTTG	ACT	ACT	C	A	C>A	C>A_ACT	CG>AT_GAATTTG	7	FALSE	FALSE
NL4_v.txt	33474	33474-SNV-C-A	SNV	1	C	A	13	10090	0.12884	36.1538	rnr1D57N	FALSE	CAN	JSY3602	7	rnr1D57N-Rep7	GCC	C>A	A/T+1	G/C-1	CG>AT	CG>AT	GCTATGCCTTTTT	CCTTTTT	CGG	GCC	C	T	C>A	C>A_GCC	CG>AT_CCTTTTT	7	FALSE	FALSE
NL4_v.txt	31884	31884-Replacement-GC-A	Replacement	2	GC	A	29	5292	0.547997	38.6724	rnr1D57N	FALSE	CAN	JSY3602	7	rnr1D57N-Rep7	AGC	nope	A/T+1	>1bpdel	none	Replac.	GCGGCAGCAAAGC	GCAAAGC	TCG	AGC	GC	T	NA	NA_AGC	Replac._GCAAAGC	7	FALSE	FALSE
NL4_v.txt	32575	32575-Replacement-G-CA	Replacement	2	G	CA	3	3968	0.0756048	39	rnr1D57N	FALSE	CAN	JSY3602	7	rnr1D57N-Rep7	TGA	nope	>1bp-ins	G/C-1	none	Replac.	TACCTTGAAATGT	GAAATGT	ACT	ACT	C	none	C>none	C>none_ACT	Replac._GAAATGT	7	FALSE	FALSE
NL4_v.txt	31884	31884-MNV-GC-AA	MNV	2	GC	AA	1	5292	0.0188964	27.9998	rnr1D57N	FALSE	CAN	JSY3602	7	rnr1D57N-Rep7	AGC	nope	>1bp-ins	>1bpdel	none	MNV	GCGGCAGCAAAGC	GCAAAGC	TCG	AGC	GC	none	NA	NA_AGC	MNV_GCAAAGC	7	FALSE	FALSE
NL4_v.txt	32498	32498-MNV-TTT-ACC	MNV	3	TTT	ACC	58	13151	0.441031	37.3793	rnr1D57N	FALSE	CAN	JSY3602	7	rnr1D57N-Rep7	CTT	nope	>1bp-ins	>1bpdel	none	MNV	AACAACTTTTTTG	TTTTTTG	GAA	CTT	TTT	none	NA	NA_CTT	MNV_TTTTTTG	7	FALSE	FALSE
NL4_v.txt	33153	33153-MNV-CC-AA	MNV	2	CC	AA	2	5930	0.0337268	37.7496	rnr1D57N	FALSE	CAN	JSY3602	7	rnr1D57N-Rep7	ACC	nope	>1bp-ins	>1bpdel	none	MNV	AAAAGACCTGTAC	CCTGTAC	TGG	ACC	CC	none	NA	NA_ACC	MNV_CCTGTAC	7	FALSE	FALSE
NL4_v.txt	31886	31886-Insertion---A	Insertion	1	-	A	1	5292	0.0188964	39	rnr1D57N	FALSE	CAN	JSY3602	7	rnr1D57N-Rep7	CAA	nope	A/T+1	>1bpdel	none	A/T+1	GGCAGCAAAGCTA	AAAGCTA	GTT	CAA	-	T	NA	NA_CAA	A/T+1_AAAGCTA	7	FALSE	FALSE
NL4_v.txt	31913	31913-Insertion---A	Insertion	1	-	A	3	5283	0.0567859	38.6667	rnr1D57N	FALSE	CAN	JSY3602	7	rnr1D57N-Rep7	CAA	nope	A/T+1	>1bpdel	none	A/T+1	TGGTGCAAAAGCC	AAAAGCC	GTT	CAA	-	T	NA	NA_CAA	A/T+1_AAAAGCC	7	FALSE	FALSE
NL4_v.txt	31977	31977-Insertion---C	Insertion	1	-	C	2	1937	0.103252	37.5	rnr1D57N	FALSE	CAN	JSY3602	7	rnr1D57N-Rep7	GCC	nope	G/C+1	>1bpdel	none	G/C+1	GCCAAGCCGGGCA	CCGGGCA	CGG	GCC	-	G	NA	NA_GCC	G/C+1_CCGGGCA	7	FALSE	FALSE
NL4_v.txt	32081	32081-Insertion---A	Insertion	1	-	A	7	1937	0.361384	64	rnr1D57N	FALSE	CAN	JSY3602	7	rnr1D57N-Rep7	CAA	nope	A/T+1	>1bpdel	none	A/T+1	CCATGCAAAAAAG	AAAAAAG	GTT	CAA	-	T	NA	NA_CAA	A/T+1_AAAAAAG	7	FALSE	FALSE
NL4_v.txt	32352	32352-Insertion---T	Insertion	1	-	T	3	13151	0.022812	64	rnr1D57N	FALSE	CAN	JSY3602	7	rnr1D57N-Rep7	CTT	nope	A/T+1	>1bpdel	none	A/T+1	AAAACCTTTGTAC	TTTGTAC	GAA	CTT	-	A	NA	NA_CTT	A/T+1_TTTGTAC	7	FALSE	FALSE
NL4_v.txt	32402	32402-Insertion---GGAAGTAGATTGTGTTAGTTTAGGGTCATTGTAT	Insertion	34	-	GGAAGTAGATTGTGTTAGTTTAGGGTCATTGTAT	5	13151	0.0380199	63.6412	rnr1D57N	FALSE	CAN	JSY3602	7	rnr1D57N-Rep7	AGG	nope	>1bp-ins	>1bpdel	none	>1bp-ins	AACGTAGGAAGTA	GGAAGTA	TCC	AGG	-	none	NA	NA_AGG	>1bp-ins_GGAAGTA	7	FALSE	FALSE
NL4_v.txt	32498	32498-Insertion---T	Insertion	1	-	T	5	13151	0.0380199	32	rnr1D57N	FALSE	CAN	JSY3602	7	rnr1D57N-Rep7	CTT	nope	A/T+1	>1bpdel	none	A/T+1	AACAACTTTTTTG	TTTTTTG	GAA	CTT	-	A	NA	NA_CTT	A/T+1_TTTTTTG	7	FALSE	FALSE
NL4_v.txt	32842	32842-Insertion---A	Insertion	1	-	A	16	3997	0.4003	37.375	rnr1D57N	FALSE	CAN	JSY3602	7	rnr1D57N-Rep7	CAA	nope	A/T+1	>1bpdel	none	A/T+1	TTACCCAAAAAAT	AAAAAAT	GTT	CAA	-	T	NA	NA_CAA	A/T+1_AAAAAAT	7	FALSE	FALSE
NL4_v.txt	33087	33087-Insertion---A	Insertion	1	-	A	13	5930	0.219224	62.0769	rnr1D57N	FALSE	CAN	JSY3602	7	rnr1D57N-Rep7	TAA	nope	A/T+1	>1bpdel	none	A/T+1	ATAAATAAATATG	AAATATG	ATT	TAA	-	T	NA	NA_TAA	A/T+1_AAATATG	7	FALSE	FALSE
NL4_v.txt	33173	33173-Insertion---A	Insertion	1	-	A	6	5927	0.101232	39	rnr1D57N	FALSE	CAN	JSY3602	7	rnr1D57N-Rep7	CAA	nope	A/T+1	>1bpdel	none	A/T+1	ACCACCAAGGGCA	AAGGGCA	GTT	CAA	-	T	NA	NA_CAA	A/T+1_AAGGGCA	7	FALSE	FALSE
NL4_v.txt	33206	33206-Insertion---CT	Insertion	2	-	CT	4	10091	0.0396393	38.875	rnr1D57N	FALSE	CAN	JSY3602	7	rnr1D57N-Rep7	GCT	nope	>1bp-ins	>1bpdel	none	>1bp-ins	CTTAAGCTCTCTC	CTCTCTC	CGA	GCT	-	none	NA	NA_GCT	>1bp-ins_CTCTCTC	7	FALSE	FALSE
NL4_v.txt	33244	33244-Insertion---CC	Insertion	2	-	CC	8	10091	0.0792786	38.8125	rnr1D57N	FALSE	CAN	JSY3602	7	rnr1D57N-Rep7	TCT	nope	>1bp-ins	>1bpdel	none	>1bp-ins	CTTCATCTTCATC	CTTCATC	AGA	TCT	-	none	NA	NA_TCT	>1bp-ins_CTTCATC	7	FALSE	FALSE
NL4_v.txt	33356	33356-Insertion---C	Insertion	1	-	C	9	10091	0.0891884	54.8889	rnr1D57N	FALSE	CAN	JSY3602	7	rnr1D57N-Rep7	ACC	nope	G/C+1	>1bpdel	none	G/C+1	TATTGACCCACGT	CCCACGT	TGG	ACC	-	G	NA	NA_ACC	G/C+1_CCCACGT	7	FALSE	FALSE
NL4_v.txt	32492	32492-Deletion-AAC--	Deletion	3	AAC	-	34	13151	0.258535	38.4412	rnr1D57N	FALSE	CAN	JSY3602	7	rnr1D57N-Rep7	AAA	nope	>1bp-ins	>1bpdel	none	>1bpdel	ACGGAAAACAACT	AACAACT	TTT	AAA	AAC	none	NA	NA_AAA	>1bpdel_AACAACT	7	FALSE	FALSE
NL4_v.txt	33094	33094-Deletion-AT--	Deletion	2	AT	-	152	5930	2.56324	60.5329	rnr1D57N	FALSE	CAN	JSY3602	7	rnr1D57N-Rep7	GAT	nope	>1bp-ins	>1bpdel	none	>1bpdel	AATATGATATAAG	ATATAAG	CTA	GAT	AT	none	NA	NA_GAT	>1bpdel_ATATAAG	7	FALSE	FALSE
NL4_v.txt	33189	33189-Deletion-AT--	Deletion	2	AT	-	209	10092	2.07095	38.3971	rnr1D57N	FALSE	CAN	JSY3602	7	rnr1D57N-Rep7	AAT	nope	>1bp-ins	>1bpdel	none	>1bpdel	ATACCAATATGTC	ATATGTC	TTA	AAT	AT	none	NA	NA_AAT	>1bpdel_ATATGTC	7	FALSE	FALSE
NL4_v.txt	33206	33206-Deletion-CT--	Deletion	2	CT	-	9	10091	0.0891884	38.4444	rnr1D57N	FALSE	CAN	JSY3602	7	rnr1D57N-Rep7	GCT	nope	>1bp-ins	>1bpdel	none	>1bpdel	CTTAAGCTCTCTC	CTCTCTC	CGA	GCT	CT	none	NA	NA_GCT	>1bpdel_CTCTCTC	7	FALSE	FALSE
NL4_v.txt	33364	33364-Deletion-TGTGGTGTGTT--	Deletion	11	TGTGGTGTGTT	-	16	10091	0.158557	62.3125	rnr1D57N	FALSE	CAN	JSY3602	7	rnr1D57N-Rep7	CTG	nope	>1bp-ins	>1bpdel	none	>1bpdel	CACGTCTGTGGTG	TGTGGTG	GAC	CTG	TGTGGTGTGTT	none	NA	NA_CTG	>1bpdel_TGTGGTG	7	FALSE	FALSE
NL4_v.txt	31711	31711-Deletion-A--	Deletion	1	A	-	11	5292	0.207861	33.6364	rnr1D57N	FALSE	CAN	JSY3602	7	rnr1D57N-Rep7	CAA	nope	>1bp-ins	A/T-1	none	A/T-1	CATTCCAAAATTT	AAAATTT	GTT	GTT	T	none	T>none	T>none_GTT	A/T-1_AAAATTT	7	FALSE	FALSE
NL4_v.txt	31723	31723-Deletion-A--	Deletion	1	A	-	6	5292	0.113379	64	rnr1D57N	FALSE	CAN	JSY3602	7	rnr1D57N-Rep7	CAA	nope	>1bp-ins	A/T-1	none	A/T-1	TGTCCCAAAAAGT	AAAAAGT	GTT	GTT	T	none	T>none	T>none_GTT	A/T-1_AAAAAGT	7	FALSE	FALSE
NL4_v.txt	32442	32442-Deletion-A--	Deletion	1	A	-	11	13151	0.0836438	61.6364	rnr1D57N	FALSE	CAN	JSY3602	7	rnr1D57N-Rep7	TAA	nope	>1bp-ins	A/T-1	none	A/T-1	GGAACTAAAAGTC	AAAAGTC	ATT	ATT	T	none	T>none	T>none_ATT	A/T-1_AAAAGTC	7	FALSE	FALSE
NL4_v.txt	32490	32490-Deletion-A--	Deletion	1	A	-	17	13151	0.129268	38.4706	rnr1D57N	FALSE	CAN	JSY3602	7	rnr1D57N-Rep7	GAA	nope	>1bp-ins	A/T-1	none	A/T-1	ATACGGAAAACAA	AAAACAA	CTT	CTT	T	none	T>none	T>none_CTT	A/T-1_AAAACAA	7	FALSE	FALSE
NL4_v.txt	32494	32494-Deletion-C--	Deletion	1	C	-	58	13151	0.441031	37.3103	rnr1D57N	FALSE	CAN	JSY3602	7	rnr1D57N-Rep7	ACA	nope	>1bp-ins	G/C-1	none	G/C-1	GGAAAACAACTTT	CAACTTT	TGT	ACA	C	none	nope	nope_ACA	G/C-1_CAACTTT	7	FALSE	FALSE
NL4_v.txt	32498	32498-Deletion-T--	Deletion	1	T	-	60	13151	0.456239	37.4333	rnr1D57N	FALSE	CAN	JSY3602	7	rnr1D57N-Rep7	CTT	nope	>1bp-ins	A/T-1	none	A/T-1	AACAACTTTTTTG	TTTTTTG	GAA	CTT	T	none	nope	nope_CTT	A/T-1_TTTTTTG	7	FALSE	FALSE
NL4_v.txt	32528	32528-Deletion-G--	Deletion	1	G	-	5	13150	0.0380228	38	rnr1D57N	FALSE	CAN	JSY3602	7	rnr1D57N-Rep7	TGG	nope	>1bp-ins	G/C-1	none	G/C-1	TTTTCTGGGGTTT	GGGGTTT	ACC	ACC	C	none	C>none	C>none_ACC	G/C-1_GGGGTTT	7	FALSE	FALSE
NL4_v.txt	32658	32658-Deletion-C--	Deletion	1	C	-	9	3970	0.2267	62.6667	rnr1D57N	FALSE	CAN	JSY3602	7	rnr1D57N-Rep7	ACC	nope	>1bp-ins	G/C-1	none	G/C-1	CCTGGACCCCAGG	CCCCAGG	TGG	ACC	C	none	nope	nope_ACC	G/C-1_CCCCAGG	7	FALSE	FALSE
NL4_v.txt	32707	32707-Deletion-C--	Deletion	1	C	-	3	3997	0.0750563	60	rnr1D57N	FALSE	CAN	JSY3602	7	rnr1D57N-Rep7	ACC	nope	>1bp-ins	G/C-1	none	G/C-1	CGGTAACCCCAGC	CCCCAGC	TGG	ACC	C	none	nope	nope_ACC	G/C-1_CCCCAGC	7	FALSE	FALSE
NL4_v.txt	32842	32842-Deletion-A--	Deletion	1	A	-	29	3997	0.725544	37.5862	rnr1D57N	FALSE	CAN	JSY3602	7	rnr1D57N-Rep7	CAA	nope	>1bp-ins	A/T-1	none	A/T-1	TTACCCAAAAAAT	AAAAAAT	GTT	GTT	T	none	T>none	T>none_GTT	A/T-1_AAAAAAT	7	FALSE	FALSE
NL4_v.txt	32860	32860-Deletion-C--	Deletion	1	C	-	7	3997	0.175131	38	rnr1D57N	FALSE	CAN	JSY3602	7	rnr1D57N-Rep7	GCC	nope	>1bp-ins	G/C-1	none	G/C-1	TCCATGCCGCCAG	CCGCCAG	CGG	GCC	C	none	nope	nope_GCC	G/C-1_CCGCCAG	7	FALSE	FALSE
NL4_v.txt	32924	32924-Deletion-A--	Deletion	1	A	-	5	5930	0.084317	38	rnr1D57N	FALSE	CAN	JSY3602	7	rnr1D57N-Rep7	CAA	nope	>1bp-ins	A/T-1	none	A/T-1	CAGGGCAAAAGTG	AAAAGTG	GTT	GTT	T	none	T>none	T>none_GTT	A/T-1_AAAAGTG	7	FALSE	FALSE
NL4_v.txt	33024	33024-Deletion-G--	Deletion	1	G	-	4	5930	0.0674536	64	rnr1D57N	FALSE	CAN	JSY3602	7	rnr1D57N-Rep7	AGG	nope	>1bp-ins	G/C-1	none	G/C-1	GTAACAGGGATGA	GGGATGA	TCC	TCC	C	none	C>none	C>none_TCC	G/C-1_GGGATGA	7	FALSE	FALSE
NL4_v.txt	33070	33070-Deletion-C--	Deletion	1	C	-	6	5930	0.10118	55.1667	rnr1D57N	FALSE	CAN	JSY3602	7	rnr1D57N-Rep7	GCC	nope	>1bp-ins	G/C-1	none	G/C-1	AATATGCCAAAGA	CCAAAGA	CGG	GCC	C	none	nope	nope_GCC	G/C-1_CCAAAGA	7	FALSE	FALSE
NL4_v.txt	33108	33108-Deletion-A--	Deletion	1	A	-	9	5930	0.151771	37.2222	rnr1D57N	FALSE	CAN	JSY3602	7	rnr1D57N-Rep7	CAC	nope	>1bp-ins	A/T-1	none	A/T-1	GCGCCCACTGGGC	ACTGGGC	GTG	GTG	T	none	T>none	T>none_GTG	A/T-1_ACTGGGC	7	FALSE	FALSE
NL4_v.txt	33153	33153-Deletion-C--	Deletion	1	C	-	1	5930	0.0168634	39	rnr1D57N	FALSE	CAN	JSY3602	7	rnr1D57N-Rep7	ACC	nope	>1bp-ins	G/C-1	none	G/C-1	AAAAGACCTGTAC	CCTGTAC	TGG	ACC	C	none	nope	nope_ACC	G/C-1_CCTGTAC	7	FALSE	FALSE
NL4_v.txt	33168	33168-Deletion-C--	Deletion	1	C	-	7	5928	0.118084	37.8571	rnr1D57N	FALSE	CAN	JSY3602	7	rnr1D57N-Rep7	ACC	nope	>1bp-ins	G/C-1	none	G/C-1	ATAGTACCACCAA	CCACCAA	TGG	ACC	C	none	nope	nope_ACC	G/C-1_CCACCAA	7	FALSE	FALSE
NL4_v.txt	33236	33236-Deletion-T--	Deletion	1	T	-	7	10091	0.0693687	36.8571	rnr1D57N	FALSE	CAN	JSY3602	7	rnr1D57N-Rep7	CTC	nope	>1bp-ins	A/T-1	none	A/T-1	TACTTCTCCTTCA	TCCTTCA	GAG	CTC	T	none	nope	nope_CTC	A/T-1_TCCTTCA	7	FALSE	FALSE
NL4_v.txt	33251	33251-Deletion-A--	Deletion	1	A	-	15	10091	0.148647	60.8667	rnr1D57N	FALSE	CAN	JSY3602	7	rnr1D57N-Rep7	CAC	nope	>1bp-ins	A/T-1	none	A/T-1	TTCATCACCTATG	ACCTATG	GTG	GTG	T	none	T>none	T>none_GTG	A/T-1_ACCTATG	7	FALSE	FALSE
NL4_v.txt	33258	33258-Deletion-C--	Deletion	1	C	-	2	10091	0.0198196	51	rnr1D57N	FALSE	CAN	JSY3602	7	rnr1D57N-Rep7	GCC	nope	>1bp-ins	G/C-1	none	G/C-1	CCTATGCCATCCT	CCATCCT	CGG	GCC	C	none	nope	nope_GCC	G/C-1_CCATCCT	7	FALSE	FALSE
NL4_v.txt	33408	33408-Deletion-A--	Deletion	1	A	-	9	10091	0.0891884	53	rnr1D57N	FALSE	CAN	JSY3602	7	rnr1D57N-Rep7	GAC	nope	>1bp-ins	A/T-1	none	A/T-1	GTTGTGACCGGCT	ACCGGCT	CTG	CTG	T	none	T>none	T>none_CTG	A/T-1_ACCGGCT	7	FALSE	FALSE
NL4_v.txt	33474	33474-Deletion-C--	Deletion	1	C	-	19	10090	0.188305	31	rnr1D57N	FALSE	CAN	JSY3602	7	rnr1D57N-Rep7	GCC	nope	>1bp-ins	G/C-1	none	G/C-1	GCTATGCCTTTTT	CCTTTTT	CGG	GCC	C	none	nope	nope_GCC	G/C-1_CCTTTTT	7	FALSE	FALSE
171_v.txt	31723	31723-SNV-A-C	SNV	1	A	C	3	10179	0.0294724	62.6667	rnr1D57N	FALSE	CAN	JSY14	1A	rnr1D57N-Rep1A	CAA	A>C	G/C+1	A/T-1	TA>GC	TA>GC	TGTCCCAAAAAGT	AAAAAGT	GTT	GTT	T	G	T>G	T>G_GTT	TA>GC_AAAAAGT	7	TRUE	FALSE
171_v.txt	31902	31902-SNV-A-C	SNV	1	A	C	5	10171	0.0491594	40.6	rnr1D57N	FALSE	CAN	JSY14	1A	rnr1D57N-Rep1A	GAA	A>C	G/C+1	A/T-1	TA>GC	TA>GC	CCATTGAATTTTG	AATTTTG	CTT	CTT	T	G	T>G	T>G_CTT	TA>GC_AATTTTG	7	TRUE	FALSE
171_v.txt	31950	31950-SNV-A-C	SNV	1	A	C	16	24201	0.066113	31.6875	rnr1D57N	FALSE	CAN	JSY14	1A	rnr1D57N-Rep1A	CAT	A>C	G/C+1	A/T-1	TA>GC	TA>GC	ATCGTCATAAATG	ATAAATG	GTA	GTA	T	G	T>G	T>G_GTA	TA>GC_ATAAATG	7	TRUE	FALSE
171_v.txt	32005	32005-SNV-A-C	SNV	1	A	C	15	24202	0.0619783	37.8	rnr1D57N	FALSE	CAN	JSY14	1A	rnr1D57N-Rep1A	AAC	A>C	G/C+1	A/T-1	TA>GC	TA>GC	ATGGTAACTCGTC	ACTCGTC	TTG	TTG	T	G	T>G	T>G_TTG	TA>GC_ACTCGTC	7	TRUE	FALSE
171_v.txt	32101	32101-SNV-T-G	SNV	1	T	G	9	24202	0.037187	53.7778	rnr1D57N	FALSE	CAN	JSY14	1A	rnr1D57N-Rep1A	GTG	T>G	G/C+1	A/T-1	TA>GC	TA>GC	CACCAGTGATATT	TGATATT	CAC	GTG	T	C	T>G	T>G_GTG	TA>GC_TGATATT	7	TRUE	FALSE
171_v.txt	32103	32103-SNV-A-C	SNV	1	A	C	10	24202	0.0413189	53.1	rnr1D57N	FALSE	CAN	JSY14	1A	rnr1D57N-Rep1A	GAT	A>C	G/C+1	A/T-1	TA>GC	TA>GC	CCAGTGATATTTA	ATATTTA	CTA	CTA	T	G	T>G	T>G_CTA	TA>GC_ATATTTA	7	TRUE	FALSE
171_v.txt	32109	32109-SNV-A-C	SNV	1	A	C	6	24202	0.0247913	59.6667	rnr1D57N	FALSE	CAN	JSY14	1A	rnr1D57N-Rep1A	TAA	A>C	G/C+1	A/T-1	TA>GC	TA>GC	ATATTTAATAGCC	AATAGCC	ATT	ATT	T	G	T>G	T>G_ATT	TA>GC_AATAGCC	7	TRUE	FALSE
171_v.txt	32123	32123-SNV-A-C	SNV	1	A	C	5	24200	0.0206612	13.8002	rnr1D57N	FALSE	CAN	JSY14	1A	rnr1D57N-Rep1A	AAA	A>C	G/C+1	A/T-1	TA>GC	TA>GC	TTCGAAAACTTTG	AACTTTG	TTT	TTT	T	G	T>G	T>G_TTT	TA>GC_AACTTTG	7	TRUE	FALSE
171_v.txt	32124	32124-SNV-A-C	SNV	1	A	C	2	24202	0.00826	52.9967	rnr1D57N	FALSE	CAN	JSY14	1A	rnr1D57N-Rep1A	AAC	A>C	G/C+1	A/T-1	TA>GC	TA>GC	TCGAAAACTTTGT	ACTTTGT	TTG	TTG	T	G	T>G	T>G_TTG	TA>GC_ACTTTGT	7	TRUE	FALSE
171_v.txt	32132	32132-SNV-A-C	SNV	1	A	C	1	24202	0.00413	44.9984	rnr1D57N	FALSE	CAN	JSY14	1A	rnr1D57N-Rep1A	CAC	A>C	G/C+1	A/T-1	TA>GC	TA>GC	TTTGTCACCACCA	ACCACCA	GTG	GTG	T	G	T>G	T>G_GTG	TA>GC_ACCACCA	7	TRUE	FALSE
171_v.txt	32152	32152-SNV-T-G	SNV	1	T	G	21	24202	0.0867697	50.1428	rnr1D57N	FALSE	CAN	JSY14	1A	rnr1D57N-Rep1A	ATG	T>G	G/C+1	A/T-1	TA>GC	TA>GC	TCTCCATGTAAGC	TGTAAGC	TAC	ATG	T	C	T>G	T>G_ATG	TA>GC_TGTAAGC	7	TRUE	FALSE
171_v.txt	32283	32283-SNV-T-G	SNV	1	T	G	1	31383	0.00319	37.9998	rnr1D57N	FALSE	CAN	JSY14	1A	rnr1D57N-Rep1A	GTA	T>G	G/C+1	A/T-1	TA>GC	TA>GC	CCAACGTAAATAT	TAAATAT	CAT	GTA	T	C	T>G	T>G_GTA	TA>GC_TAAATAT	7	TRUE	FALSE
171_v.txt	32284	32284-SNV-A-C	SNV	1	A	C	34	31383	0.108339	27.3528	rnr1D57N	FALSE	CAN	JSY14	1A	rnr1D57N-Rep1A	TAA	A>C	G/C+1	A/T-1	TA>GC	TA>GC	CAACGTAAATATT	AAATATT	ATT	ATT	T	G	T>G	T>G_ATT	TA>GC_AAATATT	7	TRUE	FALSE
171_v.txt	32294	32294-SNV-A-C	SNV	1	A	C	613	31383	1.95329	51.2217	rnr1D57N	FALSE	CAN	JSY14	1A	rnr1D57N-Rep1A	AAT	A>C	G/C+1	A/T-1	TA>GC	TA>GC	ATTTGAATTTGCG	ATTTGCG	TTA	TTA	T	G	T>G	T>G_TTA	TA>GC_ATTTGCG	7	TRUE	FALSE
171_v.txt	32319	32319-SNV-A-C	SNV	1	A	C	26	31383	0.0828474	60.6923	rnr1D57N	FALSE	CAN	JSY14	1A	rnr1D57N-Rep1A	TAA	A>C	G/C+1	A/T-1	TA>GC	TA>GC	GTTGTTAAGATAA	AAGATAA	ATT	ATT	T	G	T>G	T>G_ATT	TA>GC_AAGATAA	7	TRUE	FALSE
171_v.txt	32376	32376-SNV-A-C	SNV	1	A	C	1	31383	0.00319	59.9965	rnr1D57N	FALSE	CAN	JSY14	1A	rnr1D57N-Rep1A	AAT	A>C	G/C+1	A/T-1	TA>GC	TA>GC	ATAGCAATAATAA	ATAATAA	TTA	TTA	T	G	T>G	T>G_TTA	TA>GC_ATAATAA	7	TRUE	FALSE
171_v.txt	32441	32441-SNV-T-G	SNV	1	T	G	15	31383	0.0477966	50.799	rnr1D57N	FALSE	CAN	JSY14	1A	rnr1D57N-Rep1A	CTA	T>G	G/C+1	A/T-1	TA>GC	TA>GC	TGGAACTAAAAGT	TAAAAGT	GAT	CTA	T	C	T>G	T>G_CTA	TA>GC_TAAAAGT	7	TRUE	FALSE
171_v.txt	32574	32574-SNV-T-G	SNV	1	T	G	741	30555	2.42514	36.7581	rnr1D57N	FALSE	CAN	JSY14	1A	rnr1D57N-Rep1A	TTG	T>G	G/C+1	A/T-1	TA>GC	TA>GC	GTACCTTGAAATG	TGAAATG	AAC	TTG	T	C	T>G	T>G_TTG	TA>GC_TGAAATG	7	TRUE	FALSE
171_v.txt	32631	32631-SNV-T-G	SNV	1	T	G	2	30555	0.00655	35.4989	rnr1D57N	FALSE	CAN	JSY14	1A	rnr1D57N-Rep1A	GTT	T>G	G/C+1	A/T-1	TA>GC	TA>GC	CCTTCGTTTTTAT	TTTTTAT	CAA	GTT	T	C	T>G	T>G_GTT	TA>GC_TTTTTAT	7	TRUE	FALSE
171_v.txt	32657	32657-SNV-A-C	SNV	1	A	C	1	30555	0.00327	63.9973	rnr1D57N	FALSE	CAN	JSY14	1A	rnr1D57N-Rep1A	GAC	A>C	G/C+1	A/T-1	TA>GC	TA>GC	ACCTGGACCCCAG	ACCCCAG	CTG	CTG	T	G	T>G	T>G_CTG	TA>GC_ACCCCAG	7	TRUE	FALSE
171_v.txt	32680	32680-SNV-A-C	SNV	1	A	C	12	30555	0.0392734	60.25	rnr1D57N	FALSE	CAN	JSY14	1A	rnr1D57N-Rep1A	CAA	A>C	G/C+1	A/T-1	TA>GC	TA>GC	TTCTCCAATAACG	AATAACG	GTT	GTT	T	G	T>G	T>G_GTT	TA>GC_AATAACG	7	TRUE	FALSE
171_v.txt	32739	32739-SNV-A-C	SNV	1	A	C	26	30555	0.0850925	57.3462	rnr1D57N	FALSE	CAN	JSY14	1A	rnr1D57N-Rep1A	TAT	A>C	G/C+1	A/T-1	TA>GC	TA>GC	CAGTATATTAGAA	ATTAGAA	ATA	ATA	T	G	T>G	T>G_ATA	TA>GC_ATTAGAA	7	TRUE	FALSE
171_v.txt	32760	32760-SNV-A-C	SNV	1	A	C	37	30555	0.121093	49.9722	rnr1D57N	FALSE	CAN	JSY14	1A	rnr1D57N-Rep1A	TAA	A>C	G/C+1	A/T-1	TA>GC	TA>GC	ATGGCTAAAACTT	AAAACTT	ATT	ATT	T	G	T>G	T>G_ATT	TA>GC_AAAACTT	7	TRUE	FALSE
171_v.txt	32785	32785-SNV-A-C	SNV	1	A	C	98	30555	0.320733	47.5612	rnr1D57N	FALSE	CAN	JSY14	1A	rnr1D57N-Rep1A	AAC	A>C	G/C+1	A/T-1	TA>GC	TA>GC	CCCAGAACTCGAA	ACTCGAA	TTG	TTG	T	G	T>G	T>G_TTG	TA>GC_ACTCGAA	7	TRUE	FALSE
171_v.txt	32801	32801-SNV-A-C	SNV	1	A	C	17	30555	0.0556374	43.1148	rnr1D57N	FALSE	CAN	JSY14	1A	rnr1D57N-Rep1A	AAT	A>C	G/C+1	A/T-1	TA>GC	TA>GC	ACCGTAATATTTG	ATATTTG	TTA	TTA	T	G	T>G	T>G_TTA	TA>GC_ATATTTG	7	TRUE	FALSE
171_v.txt	32808	32808-SNV-A-C	SNV	1	A	C	8	30555	0.0261823	42.2497	rnr1D57N	FALSE	CAN	JSY14	1A	rnr1D57N-Rep1A	GAC	A>C	G/C+1	A/T-1	TA>GC	TA>GC	TATTTGACAGGGA	ACAGGGA	CTG	CTG	T	G	T>G	T>G_CTG	TA>GC_ACAGGGA	7	TRUE	FALSE
171_v.txt	32842	32842-SNV-A-C	SNV	1	A	C	4	30555	0.0130911	38.0007	rnr1D57N	FALSE	CAN	JSY14	1A	rnr1D57N-Rep1A	CAA	A>C	G/C+1	A/T-1	TA>GC	TA>GC	TTACCCAAAAAAT	AAAAAAT	GTT	GTT	T	G	T>G	T>G_GTT	TA>GC_AAAAAAT	7	TRUE	FALSE
171_v.txt	32915	32915-SNV-T-G	SNV	1	T	G	69	31348	0.22011	46.3277	rnr1D57N	FALSE	CAN	JSY14	1A	rnr1D57N-Rep1A	GTT	T>G	G/C+1	A/T-1	TA>GC	TA>GC	ACTAAGTTCCAGG	TTCCAGG	CAA	GTT	T	C	T>G	T>G_GTT	TA>GC_TTCCAGG	7	TRUE	FALSE
171_v.txt	32919	32919-SNV-A-C	SNV	1	A	C	13	31348	0.0414699	28.3846	rnr1D57N	FALSE	CAN	JSY14	1A	rnr1D57N-Rep1A	CAG	A>C	G/C+1	A/T-1	TA>GC	TA>GC	AGTTCCAGGGCAA	AGGGCAA	GTC	GTC	T	G	T>G	T>G_GTC	TA>GC_AGGGCAA	7	TRUE	FALSE
171_v.txt	32938	32938-SNV-A-C	SNV	1	A	C	6	31348	0.01914	24.1677	rnr1D57N	FALSE	CAN	JSY14	1A	rnr1D57N-Rep1A	CAA	A>C	G/C+1	A/T-1	TA>GC	TA>GC	TTGCCCAAGAAAA	AAGAAAA	GTT	GTT	T	G	T>G	T>G_GTT	TA>GC_AAGAAAA	7	TRUE	FALSE
171_v.txt	32953	32953-SNV-T-G	SNV	1	T	G	18	31348	0.0574199	49.8889	rnr1D57N	FALSE	CAN	JSY14	1A	rnr1D57N-Rep1A	ATG	T>G	G/C+1	A/T-1	TA>GC	TA>GC	AATACATGTAACC	TGTAACC	TAC	ATG	T	C	T>G	T>G_ATG	TA>GC_TGTAACC	7	TRUE	FALSE
171_v.txt	32981	32981-SNV-A-C	SNV	1	A	C	1	31348	0.00319	63.9991	rnr1D57N	FALSE	CAN	JSY14	1A	rnr1D57N-Rep1A	GAG	A>C	G/C+1	A/T-1	TA>GC	TA>GC	TGCTGGAGAAAGG	AGAAAGG	CTC	CTC	T	G	T>G	T>G_CTC	TA>GC_AGAAAGG	7	TRUE	FALSE
171_v.txt	33054	33054-SNV-T-G	SNV	1	T	G	251	31348	0.800689	57.5548	rnr1D57N	FALSE	CAN	JSY14	1A	rnr1D57N-Rep1A	CTG	T>G	G/C+1	A/T-1	TA>GC	TA>GC	AAGGACTGCGTGA	TGCGTGA	GAC	CTG	T	C	T>G	T>G_CTG	TA>GC_TGCGTGA	7	TRUE	FALSE
171_v.txt	33192	33192-SNV-T-G	SNV	1	T	G	11	13896	0.0791595	33.4545	rnr1D57N	FALSE	CAN	JSY14	1A	rnr1D57N-Rep1A	ATG	T>G	G/C+1	A/T-1	TA>GC	TA>GC	CCAATATGTCTTT	TGTCTTT	TAC	ATG	T	C	T>G	T>G_ATG	TA>GC_TGTCTTT	7	TRUE	FALSE
171_v.txt	33269	33269-SNV-A-C	SNV	1	A	C	83	13904	0.596951	15.0964	rnr1D57N	FALSE	CAN	JSY14	1A	rnr1D57N-Rep1A	TAG	A>C	G/C+1	A/T-1	TA>GC	TA>GC	CTCCATAGAGAAC	AGAGAAC	ATC	ATC	T	G	T>G	T>G_ATC	TA>GC_AGAGAAC	7	TRUE	FALSE
171_v.txt	33476	33476-SNV-T-G	SNV	1	T	G	4	13902	0.0287728	37.5	rnr1D57N	FALSE	CAN	JSY14	1A	rnr1D57N-Rep1A	CTT	T>G	G/C+1	A/T-1	TA>GC	TA>GC	TATGCCTTTTTTT	TTTTTTT	GAA	CTT	T	C	T>G	T>G_CTT	TA>GC_TTTTTTT	7	TRUE	FALSE
171_v.txt	31808	31808-SNV-A-G	SNV	1	A	G	3	10178	0.0294753	63.9995	rnr1D57N	FALSE	CAN	JSY14	1A	rnr1D57N-Rep1A	AAA	A>G	G/C+1	A/T-1	TA>CG	TA>CG	CTTCCAAATAAAT	AATAAAT	TTT	TTT	T	C	T>C	T>C_TTT	TA>CG_AATAAAT	7	TRUE	FALSE
171_v.txt	31876	31876-SNV-A-G	SNV	1	A	G	7	10179	0.068769	41.4286	rnr1D57N	FALSE	CAN	JSY14	1A	rnr1D57N-Rep1A	TAG	A>G	G/C+1	A/T-1	TA>CG	TA>CG	AGATATAGGCGGC	AGGCGGC	ATC	ATC	T	C	T>C	T>C_ATC	TA>CG_AGGCGGC	7	TRUE	FALSE
171_v.txt	32117	32117-SNV-T-C	SNV	1	T	C	4	24201	0.0165282	62.7499	rnr1D57N	FALSE	CAN	JSY14	1A	rnr1D57N-Rep1A	ATT	T>C	G/C+1	A/T-1	TA>CG	TA>CG	TAGCCATTCGAAA	TTCGAAA	TAA	ATT	T	G	T>C	T>C_ATT	TA>CG_TTCGAAA	7	TRUE	FALSE
171_v.txt	32121	32121-SNV-A-G	SNV	1	A	G	10	24202	0.0413189	42.9013	rnr1D57N	FALSE	CAN	JSY14	1A	rnr1D57N-Rep1A	GAA	A>G	G/C+1	A/T-1	TA>CG	TA>CG	CATTCGAAAACTT	AAAACTT	CTT	CTT	T	C	T>C	T>C_CTT	TA>CG_AAAACTT	7	TRUE	FALSE
171_v.txt	32123	32123-SNV-A-G	SNV	1	A	G	11	24200	0.0454545	32.8104	rnr1D57N	FALSE	CAN	JSY14	1A	rnr1D57N-Rep1A	AAA	A>G	G/C+1	A/T-1	TA>CG	TA>CG	TTCGAAAACTTTG	AACTTTG	TTT	TTT	T	C	T>C	T>C_TTT	TA>CG_AACTTTG	7	TRUE	FALSE
171_v.txt	32148	32148-SNV-T-C	SNV	1	T	C	4	24202	0.0165276	60.2498	rnr1D57N	FALSE	CAN	JSY14	1A	rnr1D57N-Rep1A	CTC	T>C	G/C+1	A/T-1	TA>CG	TA>CG	GATGTCTCCATGT	TCCATGT	GAG	CTC	T	G	T>C	T>C_CTC	TA>CG_TCCATGT	7	TRUE	FALSE
171_v.txt	32256	32256-SNV-A-G	SNV	1	A	G	41	31371	0.130694	36.0488	rnr1D57N	FALSE	CAN	JSY14	1A	rnr1D57N-Rep1A	TAG	A>G	G/C+1	A/T-1	TA>CG	TA>CG	TTTGATAGACCAA	AGACCAA	ATC	ATC	T	C	T>C	T>C_ATC	TA>CG_AGACCAA	7	TRUE	FALSE
171_v.txt	32275	32275-SNV-A-G	SNV	1	A	G	136	31385	0.433328	37.0955	rnr1D57N	FALSE	CAN	JSY14	1A	rnr1D57N-Rep1A	GAA	A>G	G/C+1	A/T-1	TA>CG	TA>CG	TACGGGAACCAAC	AACCAAC	CTT	CTT	T	C	T>C	T>C_CTT	TA>CG_AACCAAC	7	TRUE	FALSE
171_v.txt	32293	32293-SNV-A-G	SNV	1	A	G	48	31383	0.152949	51.7683	rnr1D57N	FALSE	CAN	JSY14	1A	rnr1D57N-Rep1A	GAA	A>G	G/C+1	A/T-1	TA>CG	TA>CG	TATTTGAATTTGC	AATTTGC	CTT	CTT	T	C	T>C	T>C_CTT	TA>CG_AATTTGC	7	TRUE	FALSE
171_v.txt	32445	32445-SNV-A-G	SNV	1	A	G	645	31383	2.05525	53.4822	rnr1D57N	FALSE	CAN	JSY14	1A	rnr1D57N-Rep1A	AAG	A>G	G/C+1	A/T-1	TA>CG	TA>CG	ACTAAAAGTCCAA	AGTCCAA	TTC	TTC	T	C	T>C	T>C_TTC	TA>CG_AGTCCAA	7	TRUE	FALSE
171_v.txt	32541	32541-SNV-T-C	SNV	1	T	C	7	31383	0.0223051	31.8571	rnr1D57N	FALSE	CAN	JSY14	1A	rnr1D57N-Rep1A	TTC	T>C	G/C+1	A/T-1	TA>CG	TA>CG	GCAGCTTCACCAG	TCACCAG	AAG	TTC	T	G	T>C	T>C_TTC	TA>CG_TCACCAG	7	TRUE	FALSE
171_v.txt	32543	32543-SNV-A-G	SNV	1	A	G	17	31383	0.0541695	24.1098	rnr1D57N	FALSE	CAN	JSY14	1A	rnr1D57N-Rep1A	CAC	A>G	G/C+1	A/T-1	TA>CG	TA>CG	AGCTTCACCAGCA	ACCAGCA	GTG	GTG	T	C	T>C	T>C_GTG	TA>CG_ACCAGCA	7	TRUE	FALSE
171_v.txt	32581	32581-SNV-T-C	SNV	1	T	C	9	30554	0.029456	36.3332	rnr1D57N	FALSE	CAN	JSY14	1A	rnr1D57N-Rep1A	GTG	T>C	G/C+1	A/T-1	TA>CG	TA>CG	GAAATGTGAAGGC	TGAAGGC	CAC	GTG	T	G	T>C	T>C_GTG	TA>CG_TGAAGGC	7	TRUE	FALSE
171_v.txt	32631	32631-SNV-T-C	SNV	1	T	C	2	30555	0.00655	63.997	rnr1D57N	FALSE	CAN	JSY14	1A	rnr1D57N-Rep1A	GTT	T>C	G/C+1	A/T-1	TA>CG	TA>CG	CCTTCGTTTTTAT	TTTTTAT	CAA	GTT	T	G	T>C	T>C_GTT	TA>CG_TTTTTAT	7	TRUE	FALSE
171_v.txt	32662	32662-SNV-A-G	SNV	1	A	G	21	30555	0.0687285	60.381	rnr1D57N	FALSE	CAN	JSY14	1A	rnr1D57N-Rep1A	CAG	A>G	G/C+1	A/T-1	TA>CG	TA>CG	GACCCCAGGCACC	AGGCACC	GTC	GTC	T	C	T>C	T>C_GTC	TA>CG_AGGCACC	7	TRUE	FALSE
171_v.txt	32728	32728-SNV-A-G	SNV	1	A	G	15	30554	0.0490934	60.9323	rnr1D57N	FALSE	CAN	JSY14	1A	rnr1D57N-Rep1A	CAA	A>G	G/C+1	A/T-1	TA>CG	TA>CG	CCATACAAAAACA	AAAAACA	GTT	GTT	T	C	T>C	T>C_GTT	TA>CG_AAAAACA	7	TRUE	FALSE
171_v.txt	32734	32734-SNV-A-G	SNV	1	A	G	26	30555	0.0850925	59.5385	rnr1D57N	FALSE	CAN	JSY14	1A	rnr1D57N-Rep1A	CAG	A>G	G/C+1	A/T-1	TA>CG	TA>CG	AAAAACAGTATAT	AGTATAT	GTC	GTC	T	C	T>C	T>C_GTC	TA>CG_AGTATAT	7	TRUE	FALSE
171_v.txt	32759	32759-SNV-T-C	SNV	1	T	C	2	30555	0.00655	37.4999	rnr1D57N	FALSE	CAN	JSY14	1A	rnr1D57N-Rep1A	CTA	T>C	G/C+1	A/T-1	TA>CG	TA>CG	AATGGCTAAAACT	TAAAACT	GAT	CTA	T	G	T>C	T>C_CTA	TA>CG_TAAAACT	7	TRUE	FALSE
171_v.txt	32787	32787-SNV-T-C	SNV	1	T	C	12	30555	0.0392734	50.4999	rnr1D57N	FALSE	CAN	JSY14	1A	rnr1D57N-Rep1A	CTC	T>C	G/C+1	A/T-1	TA>CG	TA>CG	CAGAACTCGAATT	TCGAATT	GAG	CTC	T	G	T>C	T>C_CTC	TA>CG_TCGAATT	7	TRUE	FALSE
171_v.txt	32814	32814-SNV-A-G	SNV	1	A	G	11	30555	0.0360007	32.453	rnr1D57N	FALSE	CAN	JSY14	1A	rnr1D57N-Rep1A	GAA	A>G	G/C+1	A/T-1	TA>CG	TA>CG	ACAGGGAACAAGT	AACAAGT	CTT	CTT	T	C	T>C	T>C_CTT	TA>CG_AACAAGT	7	TRUE	FALSE
171_v.txt	32919	32919-SNV-A-G	SNV	1	A	G	27	31348	0.0861299	43.963	rnr1D57N	FALSE	CAN	JSY14	1A	rnr1D57N-Rep1A	CAG	A>G	G/C+1	A/T-1	TA>CG	TA>CG	AGTTCCAGGGCAA	AGGGCAA	GTC	GTC	T	C	T>C	T>C_GTC	TA>CG_AGGGCAA	7	TRUE	FALSE
171_v.txt	32929	32929-SNV-T-C	SNV	1	T	C	26	31348	0.0829399	52.6891	rnr1D57N	FALSE	CAN	JSY14	1A	rnr1D57N-Rep1A	GTG	T>C	G/C+1	A/T-1	TA>CG	TA>CG	CAAAAGTGATTGC	TGATTGC	CAC	GTG	T	G	T>C	T>C_GTG	TA>CG_TGATTGC	7	TRUE	FALSE
171_v.txt	32947	32947-SNV-A-G	SNV	1	A	G	48	31348	0.15312	57	rnr1D57N	FALSE	CAN	JSY14	1A	rnr1D57N-Rep1A	CAA	A>G	G/C+1	A/T-1	TA>CG	TA>CG	AAAACCAATACAT	AATACAT	GTT	GTT	T	C	T>C	T>C_GTT	TA>CG_AATACAT	7	TRUE	FALSE
171_v.txt	32985	32985-SNV-A-G	SNV	1	A	G	46	31348	0.14674	57.2391	rnr1D57N	FALSE	CAN	JSY14	1A	rnr1D57N-Rep1A	AAG	A>G	G/C+1	A/T-1	TA>CG	TA>CG	GGAGAAAGGAATC	AGGAATC	TTC	TTC	T	C	T>C	T>C_TTC	TA>CG_AGGAATC	7	TRUE	FALSE
171_v.txt	33000	33000-SNV-A-G	SNV	1	A	G	6	31348	0.01914	40.6663	rnr1D57N	FALSE	CAN	JSY14	1A	rnr1D57N-Rep1A	GAA	A>G	G/C+1	A/T-1	TA>CG	TA>CG	TGTGAGAAAACTG	AAAACTG	CTT	CTT	T	C	T>C	T>C_CTT	TA>CG_AAAACTG	7	TRUE	FALSE
171_v.txt	33094	33094-SNV-A-G	SNV	1	A	G	4	31348	0.01276	30.2499	rnr1D57N	FALSE	CAN	JSY14	1A	rnr1D57N-Rep1A	GAT	A>G	G/C+1	A/T-1	TA>CG	TA>CG	AATATGATATAAG	ATATAAG	CTA	CTA	T	C	T>C	T>C_CTA	TA>CG_ATATAAG	7	TRUE	FALSE
171_v.txt	33126	33126-SNV-A-G	SNV	1	A	G	38	31348	0.12122	42.1053	rnr1D57N	FALSE	CAN	JSY14	1A	rnr1D57N-Rep1A	CAG	A>G	G/C+1	A/T-1	TA>CG	TA>CG	TTGGTCAGAGGTG	AGAGGTG	GTC	GTC	T	C	T>C	T>C_GTC	TA>CG_AGAGGTG	7	TRUE	FALSE
171_v.txt	33147	33147-SNV-A-G	SNV	1	A	G	20	31348	0.0637999	35.2	rnr1D57N	FALSE	CAN	JSY14	1A	rnr1D57N-Rep1A	GAA	A>G	G/C+1	A/T-1	TA>CG	TA>CG	CCAATGAAAAGAC	AAAAGAC	CTT	CTT	T	C	T>C	T>C_CTT	TA>CG_AAAAGAC	7	TRUE	FALSE
171_v.txt	33192	33192-SNV-T-C	SNV	1	T	C	26	13896	0.187104	35.5385	rnr1D57N	FALSE	CAN	JSY14	1A	rnr1D57N-Rep1A	ATG	T>C	G/C+1	A/T-1	TA>CG	TA>CG	CCAATATGTCTTT	TGTCTTT	TAC	ATG	T	G	T>C	T>C_ATG	TA>CG_TGTCTTT	7	TRUE	FALSE
171_v.txt	33476	33476-SNV-T-C	SNV	1	T	C	24	13902	0.172637	31.7083	rnr1D57N	FALSE	CAN	JSY14	1A	rnr1D57N-Rep1A	CTT	T>C	G/C+1	A/T-1	TA>CG	TA>CG	TATGCCTTTTTTT	TTTTTTT	GAA	CTT	T	G	T>C	T>C_CTT	TA>CG_TTTTTTT	7	TRUE	FALSE
171_v.txt	31822	31822-SNV-T-A	SNV	1	T	A	16	10179	0.157186	50.125	rnr1D57N	FALSE	CAN	JSY14	1A	rnr1D57N-Rep1A	CTG	T>A	A/T+1	A/T-1	TA>AT	TA>AT	TGCATCTGAATAT	TGAATAT	GAC	CTG	T	T	T>A	T>A_CTG	TA>AT_TGAATAT	7	TRUE	FALSE
171_v.txt	31839	31839-SNV-A-T	SNV	1	A	T	9	10179	0.0884173	55.3333	rnr1D57N	FALSE	CAN	JSY14	1A	rnr1D57N-Rep1A	TAA	A>T	A/T+1	A/T-1	TA>AT	TA>AT	TGAAATAAGATCC	AAGATCC	ATT	ATT	T	A	T>A	T>A_ATT	TA>AT_AAGATCC	7	TRUE	FALSE
171_v.txt	31903	31903-SNV-A-T	SNV	1	A	T	10	10171	0.0983187	41.7001	rnr1D57N	FALSE	CAN	JSY14	1A	rnr1D57N-Rep1A	AAT	A>T	A/T+1	A/T-1	TA>AT	TA>AT	CATTGAATTTTGG	ATTTTGG	TTA	TTA	T	A	T>A	T>A_TTA	TA>AT_ATTTTGG	7	TRUE	FALSE
171_v.txt	31957	31957-SNV-T-A	SNV	1	T	A	2	24202	0.00826	30.9997	rnr1D57N	FALSE	CAN	JSY14	1A	rnr1D57N-Rep1A	GTG	T>A	A/T+1	A/T-1	TA>AT	TA>AT	TAAATGTGGCCGC	TGGCCGC	CAC	GTG	T	T	T>A	T>A_GTG	TA>AT_TGGCCGC	7	TRUE	FALSE
171_v.txt	31964	31964-SNV-A-T	SNV	1	A	T	20	24202	0.0826378	35.25	rnr1D57N	FALSE	CAN	JSY14	1A	rnr1D57N-Rep1A	CAT	A>T	A/T+1	A/T-1	TA>AT	TA>AT	GGCCGCATAATAA	ATAATAA	GTA	GTA	T	A	T>A	T>A_GTA	TA>AT_ATAATAA	7	TRUE	FALSE
171_v.txt	31996	31996-SNV-T-A	SNV	1	T	A	30	24202	0.123957	55.9333	rnr1D57N	FALSE	CAN	JSY14	1A	rnr1D57N-Rep1A	TTA	T>A	A/T+1	A/T-1	TA>AT	TA>AT	TAGCTTTAAATGG	TAAATGG	AAT	TTA	T	T	T>A	T>A_TTA	TA>AT_TAAATGG	7	TRUE	FALSE
171_v.txt	32032	32032-SNV-T-A	SNV	1	T	A	32	24202	0.13222	60.25	rnr1D57N	FALSE	CAN	JSY14	1A	rnr1D57N-Rep1A	TTC	T>A	A/T+1	A/T-1	TA>AT	TA>AT	GGTATTTCAAAGC	TCAAAGC	AAG	TTC	T	T	T>A	T>A_TTC	TA>AT_TCAAAGC	7	TRUE	FALSE
171_v.txt	32050	32050-SNV-T-A	SNV	1	T	A	107	24202	0.442112	62.8879	rnr1D57N	FALSE	CAN	JSY14	1A	rnr1D57N-Rep1A	CTG	T>A	A/T+1	A/T-1	TA>AT	TA>AT	TAAATCTGATGTG	TGATGTG	GAC	CTG	T	T	T>A	T>A_CTG	TA>AT_TGATGTG	7	TRUE	FALSE
171_v.txt	32055	32055-SNV-T-A	SNV	1	T	A	23	24202	0.0950335	60.7391	rnr1D57N	FALSE	CAN	JSY14	1A	rnr1D57N-Rep1A	GTG	T>A	A/T+1	A/T-1	TA>AT	TA>AT	CTGATGTGCGAGA	TGCGAGA	CAC	GTG	T	T	T>A	T>A_GTG	TA>AT_TGCGAGA	7	TRUE	FALSE
171_v.txt	32117	32117-SNV-T-A	SNV	1	T	A	10	24201	0.0413206	43.8995	rnr1D57N	FALSE	CAN	JSY14	1A	rnr1D57N-Rep1A	ATT	T>A	A/T+1	A/T-1	TA>AT	TA>AT	TAGCCATTCGAAA	TTCGAAA	TAA	ATT	T	T	T>A	T>A_ATT	TA>AT_TTCGAAA	7	TRUE	FALSE
171_v.txt	32126	32126-SNV-T-A	SNV	1	T	A	2	24201	0.00826	37.4996	rnr1D57N	FALSE	CAN	JSY14	1A	rnr1D57N-Rep1A	CTT	T>A	A/T+1	A/T-1	TA>AT	TA>AT	GAAAACTTTGTCA	TTTGTCA	GAA	CTT	T	T	T>A	T>A_CTT	TA>AT_TTTGTCA	7	TRUE	FALSE
171_v.txt	32127	32127-SNV-T-A	SNV	1	T	A	4	24202	0.0165276	50.4969	rnr1D57N	FALSE	CAN	JSY14	1A	rnr1D57N-Rep1A	TTT	T>A	A/T+1	A/T-1	TA>AT	TA>AT	AAAACTTTGTCAC	TTGTCAC	AAA	TTT	T	T	T>A	T>A_TTT	TA>AT_TTGTCAC	7	TRUE	FALSE
171_v.txt	32130	32130-SNV-T-A	SNV	1	T	A	8	24202	0.0330551	49.2493	rnr1D57N	FALSE	CAN	JSY14	1A	rnr1D57N-Rep1A	GTC	T>A	A/T+1	A/T-1	TA>AT	TA>AT	ACTTTGTCACCAC	TCACCAC	CAG	GTC	T	T	T>A	T>A_GTC	TA>AT_TCACCAC	7	TRUE	FALSE
171_v.txt	32148	32148-SNV-T-A	SNV	1	T	A	8	24202	0.0330551	37.3743	rnr1D57N	FALSE	CAN	JSY14	1A	rnr1D57N-Rep1A	CTC	T>A	A/T+1	A/T-1	TA>AT	TA>AT	GATGTCTCCATGT	TCCATGT	GAG	CTC	T	T	T>A	T>A_CTC	TA>AT_TCCATGT	7	TRUE	FALSE
171_v.txt	32152	32152-SNV-T-A	SNV	1	T	A	3	24202	0.0123957	61.6665	rnr1D57N	FALSE	CAN	JSY14	1A	rnr1D57N-Rep1A	ATG	T>A	A/T+1	A/T-1	TA>AT	TA>AT	TCTCCATGTAAGC	TGTAAGC	TAC	ATG	T	T	T>A	T>A_ATG	TA>AT_TGTAAGC	7	TRUE	FALSE
171_v.txt	32275	32275-SNV-A-T	SNV	1	A	T	6	31385	0.0191174	28.6664	rnr1D57N	FALSE	CAN	JSY14	1A	rnr1D57N-Rep1A	GAA	A>T	A/T+1	A/T-1	TA>AT	TA>AT	TACGGGAACCAAC	AACCAAC	CTT	CTT	T	A	T>A	T>A_CTT	TA>AT_AACCAAC	7	TRUE	FALSE
171_v.txt	32283	32283-SNV-T-A	SNV	1	T	A	28	31383	0.0892203	32.9973	rnr1D57N	FALSE	CAN	JSY14	1A	rnr1D57N-Rep1A	GTA	T>A	A/T+1	A/T-1	TA>AT	TA>AT	CCAACGTAAATAT	TAAATAT	CAT	GTA	T	T	T>A	T>A_GTA	TA>AT_TAAATAT	7	TRUE	FALSE
171_v.txt	32287	32287-SNV-T-A	SNV	1	T	A	20	31383	0.0637288	49.55	rnr1D57N	FALSE	CAN	JSY14	1A	rnr1D57N-Rep1A	ATA	T>A	A/T+1	A/T-1	TA>AT	TA>AT	CGTAAATATTTGA	TATTTGA	TAT	ATA	T	T	T>A	T>A_ATA	TA>AT_TATTTGA	7	TRUE	FALSE
171_v.txt	32294	32294-SNV-A-T	SNV	1	A	T	13	31383	0.0414237	50.3064	rnr1D57N	FALSE	CAN	JSY14	1A	rnr1D57N-Rep1A	AAT	A>T	A/T+1	A/T-1	TA>AT	TA>AT	ATTTGAATTTGCG	ATTTGCG	TTA	TTA	T	A	T>A	T>A_TTA	TA>AT_ATTTGCG	7	TRUE	FALSE
171_v.txt	32377	32377-SNV-T-A	SNV	1	T	A	6	31375	0.0191235	52.3231	rnr1D57N	FALSE	CAN	JSY14	1A	rnr1D57N-Rep1A	ATA	T>A	A/T+1	A/T-1	TA>AT	TA>AT	TAGCAATAATAAA	TAATAAA	TAT	ATA	T	T	T>A	T>A_ATA	TA>AT_TAATAAA	7	TRUE	FALSE
171_v.txt	32475	32475-SNV-A-T	SNV	1	A	T	17	31383	0.0541695	45.2353	rnr1D57N	FALSE	CAN	JSY14	1A	rnr1D57N-Rep1A	GAA	A>T	A/T+1	A/T-1	TA>AT	TA>AT	ATGTAGAAGGTTA	AAGGTTA	CTT	CTT	T	A	T>A	T>A_CTT	TA>AT_AAGGTTA	7	TRUE	FALSE
171_v.txt	32498	32498-SNV-T-A	SNV	1	T	A	6	31383	0.0191186	42.1655	rnr1D57N	FALSE	CAN	JSY14	1A	rnr1D57N-Rep1A	CTT	T>A	A/T+1	A/T-1	TA>AT	TA>AT	AACAACTTTTTTG	TTTTTTG	GAA	CTT	T	T	T>A	T>A_CTT	TA>AT_TTTTTTG	7	TRUE	FALSE
171_v.txt	32541	32541-SNV-T-A	SNV	1	T	A	1	31383	0.00319	37.9998	rnr1D57N	FALSE	CAN	JSY14	1A	rnr1D57N-Rep1A	TTC	T>A	A/T+1	A/T-1	TA>AT	TA>AT	GCAGCTTCACCAG	TCACCAG	AAG	TTC	T	T	T>A	T>A_TTC	TA>AT_TCACCAG	7	TRUE	FALSE
171_v.txt	32551	32551-SNV-T-A	SNV	1	T	A	5	31379	0.0159342	38	rnr1D57N	FALSE	CAN	JSY14	1A	rnr1D57N-Rep1A	GTG	T>A	A/T+1	A/T-1	TA>AT	TA>AT	CAGCAGTGATACC	TGATACC	CAC	GTG	T	T	T>A	T>A_GTG	TA>AT_TGATACC	7	TRUE	FALSE
171_v.txt	32574	32574-SNV-T-A	SNV	1	T	A	5	30555	0.0163639	37.7987	rnr1D57N	FALSE	CAN	JSY14	1A	rnr1D57N-Rep1A	TTG	T>A	A/T+1	A/T-1	TA>AT	TA>AT	GTACCTTGAAATG	TGAAATG	AAC	TTG	T	T	T>A	T>A_TTG	TA>AT_TGAAATG	7	TRUE	FALSE
171_v.txt	32759	32759-SNV-T-A	SNV	1	T	A	2	30555	0.00655	36.9996	rnr1D57N	FALSE	CAN	JSY14	1A	rnr1D57N-Rep1A	CTA	T>A	A/T+1	A/T-1	TA>AT	TA>AT	AATGGCTAAAACT	TAAAACT	GAT	CTA	T	T	T>A	T>A_CTA	TA>AT_TAAAACT	7	TRUE	FALSE
171_v.txt	32787	32787-SNV-T-A	SNV	1	T	A	4	30555	0.0130911	37.4998	rnr1D57N	FALSE	CAN	JSY14	1A	rnr1D57N-Rep1A	CTC	T>A	A/T+1	A/T-1	TA>AT	TA>AT	CAGAACTCGAATT	TCGAATT	GAG	CTC	T	T	T>A	T>A_CTC	TA>AT_TCGAATT	7	TRUE	FALSE
171_v.txt	32806	32806-SNV-T-A	SNV	1	T	A	64	30555	0.209458	46.1406	rnr1D57N	FALSE	CAN	JSY14	1A	rnr1D57N-Rep1A	TTG	T>A	A/T+1	A/T-1	TA>AT	TA>AT	AATATTTGACAGG	TGACAGG	AAC	TTG	T	T	T>A	T>A_TTG	TA>AT_TGACAGG	7	TRUE	FALSE
171_v.txt	32808	32808-SNV-A-T	SNV	1	A	T	5	30555	0.0163639	36.7985	rnr1D57N	FALSE	CAN	JSY14	1A	rnr1D57N-Rep1A	GAC	A>T	A/T+1	A/T-1	TA>AT	TA>AT	TATTTGACAGGGA	ACAGGGA	CTG	CTG	T	A	T>A	T>A_CTG	TA>AT_ACAGGGA	7	TRUE	FALSE
171_v.txt	32938	32938-SNV-A-T	SNV	1	A	T	1287	31348	4.10553	56.0019	rnr1D57N	FALSE	CAN	JSY14	1A	rnr1D57N-Rep1A	CAA	A>T	A/T+1	A/T-1	TA>AT	TA>AT	TTGCCCAAGAAAA	AAGAAAA	GTT	GTT	T	A	T>A	T>A_GTT	TA>AT_AAGAAAA	7	TRUE	FALSE
171_v.txt	32992	32992-SNV-T-A	SNV	1	T	A	39	31348	0.12441	57.1026	rnr1D57N	FALSE	CAN	JSY14	1A	rnr1D57N-Rep1A	CTT	T>A	A/T+1	A/T-1	TA>AT	TA>AT	GGAATCTTTGTGA	TTTGTGA	GAA	CTT	T	T	T>A	T>A_CTT	TA>AT_TTTGTGA	7	TRUE	FALSE
171_v.txt	33000	33000-SNV-A-T	SNV	1	A	T	3	31348	0.00957	37.9991	rnr1D57N	FALSE	CAN	JSY14	1A	rnr1D57N-Rep1A	GAA	A>T	A/T+1	A/T-1	TA>AT	TA>AT	TGTGAGAAAACTG	AAAACTG	CTT	CTT	T	A	T>A	T>A_CTT	TA>AT_AAAACTG	7	TRUE	FALSE
171_v.txt	33066	33066-SNV-T-A	SNV	1	T	A	2	31348	0.00638	63.9946	rnr1D57N	FALSE	CAN	JSY14	1A	rnr1D57N-Rep1A	ATA	T>A	A/T+1	A/T-1	TA>AT	TA>AT	ACAGAATATGCCA	TATGCCA	TAT	ATA	T	T	T>A	T>A_ATA	TA>AT_TATGCCA	7	TRUE	FALSE
171_v.txt	33090	33090-SNV-T-A	SNV	1	T	A	3	31348	0.00957	54.9953	rnr1D57N	FALSE	CAN	JSY14	1A	rnr1D57N-Rep1A	ATA	T>A	A/T+1	A/T-1	TA>AT	TA>AT	AATAAATATGATA	TATGATA	TAT	ATA	T	T	T>A	T>A_ATA	TA>AT_TATGATA	7	TRUE	FALSE
171_v.txt	33095	33095-SNV-T-A	SNV	1	T	A	9	31348	0.02871	37.6661	rnr1D57N	FALSE	CAN	JSY14	1A	rnr1D57N-Rep1A	ATA	T>A	A/T+1	A/T-1	TA>AT	TA>AT	ATATGATATAAGA	TATAAGA	TAT	ATA	T	T	T>A	T>A_ATA	TA>AT_TATAAGA	7	TRUE	FALSE
171_v.txt	33295	33295-SNV-T-A	SNV	1	T	A	13	13904	0.0934983	53.2308	rnr1D57N	FALSE	CAN	JSY14	1A	rnr1D57N-Rep1A	CTC	T>A	A/T+1	A/T-1	TA>AT	TA>AT	TTACTCTCGTCGG	TCGTCGG	GAG	CTC	T	T	T>A	T>A_CTC	TA>AT_TCGTCGG	7	TRUE	FALSE
171_v.txt	33321	33321-SNV-A-T	SNV	1	A	T	14	13904	0.10069	53.4286	rnr1D57N	FALSE	CAN	JSY14	1A	rnr1D57N-Rep1A	CAA	A>T	A/T+1	A/T-1	TA>AT	TA>AT	GGATACAATTCTT	AATTCTT	GTT	GTT	T	A	T>A	T>A_GTT	TA>AT_AATTCTT	7	TRUE	FALSE
171_v.txt	31650	31650-SNV-C-T	SNV	1	C	T	25	10179	0.245604	36.8	rnr1D57N	FALSE	CAN	JSY14	1A	rnr1D57N-Rep1A	GCG	C>T	A/T+1	G/C-1	CG>TA	CG>TA	AGAATGCGAAATG	CGAAATG	CGC	GCG	C	A	C>T	C>T_GCG	CG>TA_CGAAATG	7	TRUE	FALSE
171_v.txt	31806	31806-SNV-C-T	SNV	1	C	T	257	10178	2.52505	59.4427	rnr1D57N	FALSE	CAN	JSY14	1A	rnr1D57N-Rep1A	CCA	C>T	A/T+1	G/C-1	CG>TA	CG>TA	ATCTTCCAAATAA	CAAATAA	GGT	CCA	C	A	C>T	C>T_CCA	CG>TA_CAAATAA	7	TRUE	FALSE
171_v.txt	31962	31962-SNV-G-A	SNV	1	G	A	45	24202	0.185935	36.8	rnr1D57N	FALSE	CAN	JSY14	1A	rnr1D57N-Rep1A	CGC	G>A	A/T+1	G/C-1	CG>TA	CG>TA	GTGGCCGCATAAT	GCATAAT	GCG	GCG	C	T	C>T	C>T_GCG	CG>TA_GCATAAT	7	TRUE	FALSE
171_v.txt	32041	32041-SNV-G-A	SNV	1	G	A	56	24202	0.231386	62.1786	rnr1D57N	FALSE	CAN	JSY14	1A	rnr1D57N-Rep1A	TGC	G>A	A/T+1	G/C-1	CG>TA	CG>TA	AAGCTTGCATAAA	GCATAAA	ACG	ACG	C	T	C>T	C>T_ACG	CG>TA_GCATAAA	7	TRUE	FALSE
171_v.txt	32088	32088-SNV-C-T	SNV	1	C	T	84	24202	0.347079	60.3333	rnr1D57N	FALSE	CAN	JSY14	1A	rnr1D57N-Rep1A	GCC	C>T	A/T+1	G/C-1	CG>TA	CG>TA	AAAAAGCCTGCAA	CCTGCAA	CGG	GCC	C	A	C>T	C>T_GCC	CG>TA_CCTGCAA	7	TRUE	FALSE
171_v.txt	32092	32092-SNV-C-T	SNV	1	C	T	28	24202	0.115693	60.5	rnr1D57N	FALSE	CAN	JSY14	1A	rnr1D57N-Rep1A	GCA	C>T	A/T+1	G/C-1	CG>TA	CG>TA	AGCCTGCAACACC	CAACACC	CGT	GCA	C	A	C>T	C>T_GCA	CG>TA_CAACACC	7	TRUE	FALSE
171_v.txt	32114	32114-SNV-C-T	SNV	1	C	T	22	24202	0.0909016	49.5909	rnr1D57N	FALSE	CAN	JSY14	1A	rnr1D57N-Rep1A	GCC	C>T	A/T+1	G/C-1	CG>TA	CG>TA	TAATAGCCATTCG	CCATTCG	CGG	GCC	C	A	C>T	C>T_GCC	CG>TA_CCATTCG	7	TRUE	FALSE
171_v.txt	32115	32115-SNV-C-T	SNV	1	C	T	9	24202	0.037187	51.1117	rnr1D57N	FALSE	CAN	JSY14	1A	rnr1D57N-Rep1A	CCA	C>T	A/T+1	G/C-1	CG>TA	CG>TA	AATAGCCATTCGA	CATTCGA	GGT	CCA	C	A	C>T	C>T_CCA	CG>TA_CATTCGA	7	TRUE	FALSE
171_v.txt	32120	32120-SNV-G-A	SNV	1	G	A	5	24202	0.0206594	63.9783	rnr1D57N	FALSE	CAN	JSY14	1A	rnr1D57N-Rep1A	CGA	G>A	A/T+1	G/C-1	CG>TA	CG>TA	CCATTCGAAAACT	GAAAACT	GCT	GCT	C	T	C>T	C>T_GCT	CG>TA_GAAAACT	7	TRUE	FALSE
171_v.txt	32125	32125-SNV-C-T	SNV	1	C	T	1	24202	0.00413	64	rnr1D57N	FALSE	CAN	JSY14	1A	rnr1D57N-Rep1A	ACT	C>T	A/T+1	G/C-1	CG>TA	CG>TA	CGAAAACTTTGTC	CTTTGTC	TGA	ACT	C	A	C>T	C>T_ACT	CG>TA_CTTTGTC	7	TRUE	FALSE
171_v.txt	32131	32131-SNV-C-T	SNV	1	C	T	7	24202	0.0289232	48.2859	rnr1D57N	FALSE	CAN	JSY14	1A	rnr1D57N-Rep1A	TCA	C>T	A/T+1	G/C-1	CG>TA	CG>TA	CTTTGTCACCACC	CACCACC	AGT	TCA	C	A	C>T	C>T_TCA	CG>TA_CACCACC	7	TRUE	FALSE
171_v.txt	32164	32164-SNV-C-T	SNV	1	C	T	5	24202	0.0206594	44.7992	rnr1D57N	FALSE	CAN	JSY14	1A	rnr1D57N-Rep1A	GCG	C>T	A/T+1	G/C-1	CG>TA	CG>TA	CCAAAGCGCCAAA	CGCCAAA	CGC	GCG	C	A	C>T	C>T_GCG	CG>TA_CGCCAAA	7	TRUE	FALSE
171_v.txt	32165	32165-SNV-G-A	SNV	1	G	A	35	24202	0.144616	47.1709	rnr1D57N	FALSE	CAN	JSY14	1A	rnr1D57N-Rep1A	CGC	G>A	A/T+1	G/C-1	CG>TA	CG>TA	CAAAGCGCCAAAT	GCCAAAT	GCG	GCG	C	T	C>T	C>T_GCG	CG>TA_GCCAAAT	7	TRUE	FALSE
171_v.txt	32271	32271-SNV-C-T	SNV	1	C	T	33	31385	0.105146	34.091	rnr1D57N	FALSE	CAN	JSY14	1A	rnr1D57N-Rep1A	ACG	C>T	A/T+1	G/C-1	CG>TA	CG>TA	AAAATACGGGAAC	CGGGAAC	TGC	ACG	C	A	C>T	C>T_ACG	CG>TA_CGGGAAC	7	TRUE	FALSE
171_v.txt	32272	32272-SNV-G-A	SNV	1	G	A	148	31385	0.471563	36.7095	rnr1D57N	FALSE	CAN	JSY14	1A	rnr1D57N-Rep1A	CGG	G>A	A/T+1	G/C-1	CG>TA	CG>TA	AAATACGGGAACC	GGGAACC	GCC	GCC	C	T	C>T	C>T_GCC	CG>TA_GGGAACC	7	TRUE	FALSE
171_v.txt	32274	32274-SNV-G-A	SNV	1	G	A	70	31385	0.223036	36.8124	rnr1D57N	FALSE	CAN	JSY14	1A	rnr1D57N-Rep1A	GGA	G>A	A/T+1	G/C-1	CG>TA	CG>TA	ATACGGGAACCAA	GAACCAA	CCT	CCT	C	T	C>T	C>T_CCT	CG>TA_GAACCAA	7	TRUE	FALSE
171_v.txt	32299	32299-SNV-C-T	SNV	1	C	T	52	31383	0.165695	49.5962	rnr1D57N	FALSE	CAN	JSY14	1A	rnr1D57N-Rep1A	GCG	C>T	A/T+1	G/C-1	CG>TA	CG>TA	AATTTGCGGCAGA	CGGCAGA	CGC	GCG	C	A	C>T	C>T_GCG	CG>TA_CGGCAGA	7	TRUE	FALSE
171_v.txt	32301	32301-SNV-G-A	SNV	1	G	A	17	31383	0.0541695	50.2941	rnr1D57N	FALSE	CAN	JSY14	1A	rnr1D57N-Rep1A	GGC	G>A	A/T+1	G/C-1	CG>TA	CG>TA	TTTGCGGCAGAAA	GCAGAAA	CCG	CCG	C	T	C>T	C>T_CCG	CG>TA_GCAGAAA	7	TRUE	FALSE
171_v.txt	32313	32313-SNV-G-A	SNV	1	G	A	55	31383	0.175254	60.4909	rnr1D57N	FALSE	CAN	JSY14	1A	rnr1D57N-Rep1A	GGT	G>A	A/T+1	G/C-1	CG>TA	CG>TA	ATAATGGTTGTTA	GTTGTTA	CCA	CCA	C	T	C>T	C>T_CCA	CG>TA_GTTGTTA	7	TRUE	FALSE
171_v.txt	32361	32361-SNV-G-A	SNV	1	G	A	4	31383	0.0127458	50.2498	rnr1D57N	FALSE	CAN	JSY14	1A	rnr1D57N-Rep1A	AGA	G>A	A/T+1	G/C-1	CG>TA	CG>TA	GTACCAGAGTTCT	GAGTTCT	TCT	TCT	C	T	C>T	C>T_TCT	CG>TA_GAGTTCT	7	TRUE	FALSE
171_v.txt	32449	32449-SNV-C-T	SNV	1	C	T	68	31383	0.216678	51.4559	rnr1D57N	FALSE	CAN	JSY14	1A	rnr1D57N-Rep1A	CCA	C>T	A/T+1	G/C-1	CG>TA	CG>TA	AAAGTCCAATGAA	CAATGAA	GGT	CCA	C	A	C>T	C>T_CCA	CG>TA_CAATGAA	7	TRUE	FALSE
171_v.txt	32466	32466-SNV-C-T	SNV	1	C	T	33	31383	0.105152	48.0606	rnr1D57N	FALSE	CAN	JSY14	1A	rnr1D57N-Rep1A	GCC	C>T	A/T+1	G/C-1	CG>TA	CG>TA	AGAGAGCCAATGT	CCAATGT	CGG	GCC	C	A	C>T	C>T_GCC	CG>TA_CCAATGT	7	TRUE	FALSE
171_v.txt	32487	32487-SNV-C-T	SNV	1	C	T	18	31383	0.0573559	44.1662	rnr1D57N	FALSE	CAN	JSY14	1A	rnr1D57N-Rep1A	ACG	C>T	A/T+1	G/C-1	CG>TA	CG>TA	AAGATACGGAAAA	CGGAAAA	TGC	ACG	C	A	C>T	C>T_ACG	CG>TA_CGGAAAA	7	TRUE	FALSE
171_v.txt	32488	32488-SNV-G-A	SNV	1	G	A	62	31383	0.197559	47.6294	rnr1D57N	FALSE	CAN	JSY14	1A	rnr1D57N-Rep1A	CGG	G>A	A/T+1	G/C-1	CG>TA	CG>TA	AGATACGGAAAAC	GGAAAAC	GCC	GCC	C	T	C>T	C>T_GCC	CG>TA_GGAAAAC	7	TRUE	FALSE
171_v.txt	32535	32535-SNV-G-A	SNV	1	G	A	32	31383	0.101966	37.3704	rnr1D57N	FALSE	CAN	JSY14	1A	rnr1D57N-Rep1A	TGC	G>A	A/T+1	G/C-1	CG>TA	CG>TA	GGGTTTGCAGCTT	GCAGCTT	ACG	ACG	C	T	C>T	C>T_ACG	CG>TA_GCAGCTT	7	TRUE	FALSE
171_v.txt	32536	32536-SNV-C-T	SNV	1	C	T	51	31383	0.162508	36.9799	rnr1D57N	FALSE	CAN	JSY14	1A	rnr1D57N-Rep1A	GCA	C>T	A/T+1	G/C-1	CG>TA	CG>TA	GGTTTGCAGCTTC	CAGCTTC	CGT	GCA	C	A	C>T	C>T_GCA	CG>TA_CAGCTTC	7	TRUE	FALSE
171_v.txt	32542	32542-SNV-C-T	SNV	1	C	T	43	31383	0.137017	37.3486	rnr1D57N	FALSE	CAN	JSY14	1A	rnr1D57N-Rep1A	TCA	C>T	A/T+1	G/C-1	CG>TA	CG>TA	CAGCTTCACCAGC	CACCAGC	AGT	TCA	C	A	C>T	C>T_TCA	CG>TA_CACCAGC	7	TRUE	FALSE
171_v.txt	32544	32544-SNV-C-T	SNV	1	C	T	116	31383	0.369627	37.8358	rnr1D57N	FALSE	CAN	JSY14	1A	rnr1D57N-Rep1A	ACC	C>T	A/T+1	G/C-1	CG>TA	CG>TA	GCTTCACCAGCAG	CCAGCAG	TGG	ACC	C	A	C>T	C>T_ACC	CG>TA_CCAGCAG	7	TRUE	FALSE
171_v.txt	32545	32545-SNV-C-T	SNV	1	C	T	13	31383	0.0414237	34.7692	rnr1D57N	FALSE	CAN	JSY14	1A	rnr1D57N-Rep1A	CCA	C>T	A/T+1	G/C-1	CG>TA	CG>TA	CTTCACCAGCAGT	CAGCAGT	GGT	CCA	C	A	C>T	C>T_CCA	CG>TA_CAGCAGT	7	TRUE	FALSE
171_v.txt	32550	32550-SNV-G-A	SNV	1	G	A	2	31379	0.00637	24.4998	rnr1D57N	FALSE	CAN	JSY14	1A	rnr1D57N-Rep1A	AGT	G>A	A/T+1	G/C-1	CG>TA	CG>TA	CCAGCAGTGATAC	GTGATAC	TCA	TCA	C	T	C>T	C>T_TCA	CG>TA_GTGATAC	7	TRUE	FALSE
171_v.txt	32580	32580-SNV-G-A	SNV	1	G	A	7	30554	0.0229103	29.2833	rnr1D57N	FALSE	CAN	JSY14	1A	rnr1D57N-Rep1A	TGT	G>A	A/T+1	G/C-1	CG>TA	CG>TA	TGAAATGTGAAGG	GTGAAGG	ACA	ACA	C	T	C>T	C>T_ACA	CG>TA_GTGAAGG	7	TRUE	FALSE
171_v.txt	32590	32590-SNV-C-T	SNV	1	C	T	34	30554	0.111278	34.5	rnr1D57N	FALSE	CAN	JSY14	1A	rnr1D57N-Rep1A	GCG	C>T	A/T+1	G/C-1	CG>TA	CG>TA	AGGCAGCGTTAAT	CGTTAAT	CGC	GCG	C	A	C>T	C>T_GCG	CG>TA_CGTTAAT	7	TRUE	FALSE
171_v.txt	32609	32609-SNV-C-T	SNV	1	C	T	42	30555	0.137457	45.737	rnr1D57N	FALSE	CAN	JSY14	1A	rnr1D57N-Rep1A	CCC	C>T	A/T+1	G/C-1	CG>TA	CG>TA	GGAAACCCAACCT	CCAACCT	GGG	CCC	C	A	C>T	C>T_CCC	CG>TA_CCAACCT	7	TRUE	FALSE
171_v.txt	32610	32610-SNV-C-T	SNV	1	C	T	31	30555	0.101456	45.0204	rnr1D57N	FALSE	CAN	JSY14	1A	rnr1D57N-Rep1A	CCA	C>T	A/T+1	G/C-1	CG>TA	CG>TA	GAAACCCAACCTA	CAACCTA	GGT	CCA	C	A	C>T	C>T_CCA	CG>TA_CAACCTA	7	TRUE	FALSE
171_v.txt	32658	32658-SNV-C-T	SNV	1	C	T	6	30555	0.0196367	51.9958	rnr1D57N	FALSE	CAN	JSY14	1A	rnr1D57N-Rep1A	ACC	C>T	A/T+1	G/C-1	CG>TA	CG>TA	CCTGGACCCCAGG	CCCCAGG	TGG	ACC	C	A	C>T	C>T_ACC	CG>TA_CCCCAGG	7	TRUE	FALSE
171_v.txt	32678	32678-SNV-C-T	SNV	1	C	T	85	30554	0.278196	58.4316	rnr1D57N	FALSE	CAN	JSY14	1A	rnr1D57N-Rep1A	TCC	C>T	A/T+1	G/C-1	CG>TA	CG>TA	GTTTCTCCAATAA	CCAATAA	AGG	TCC	C	A	C>T	C>T_TCC	CG>TA_CCAATAA	7	TRUE	FALSE
171_v.txt	32700	32700-SNV-C-T	SNV	1	C	T	29	30555	0.0949108	55.6897	rnr1D57N	FALSE	CAN	JSY14	1A	rnr1D57N-Rep1A	GCC	C>T	A/T+1	G/C-1	CG>TA	CG>TA	ACTGGGCCGGTAA	CCGGTAA	CGG	GCC	C	A	C>T	C>T_GCC	CG>TA_CCGGTAA	7	TRUE	FALSE
171_v.txt	32749	32749-SNV-C-T	SNV	1	C	T	158	30555	0.5171	57.3101	rnr1D57N	FALSE	CAN	JSY14	1A	rnr1D57N-Rep1A	CCG	C>T	A/T+1	G/C-1	CG>TA	CG>TA	GAAACCCGATAAT	CGATAAT	GGC	CCG	C	A	C>T	C>T_CCG	CG>TA_CGATAAT	7	TRUE	FALSE
171_v.txt	32775	32775-SNV-G-A	SNV	1	G	A	112	30555	0.366552	49.6339	rnr1D57N	FALSE	CAN	JSY14	1A	rnr1D57N-Rep1A	AGC	G>A	A/T+1	G/C-1	CG>TA	CG>TA	ATGGAAGCGACCC	GCGACCC	TCG	TCG	C	T	C>T	C>T_TCG	CG>TA_GCGACCC	7	TRUE	FALSE
171_v.txt	32776	32776-SNV-C-T	SNV	1	C	T	18	30554	0.0589121	45.3333	rnr1D57N	FALSE	CAN	JSY14	1A	rnr1D57N-Rep1A	GCG	C>T	A/T+1	G/C-1	CG>TA	CG>TA	TGGAAGCGACCCA	CGACCCA	CGC	GCG	C	A	C>T	C>T_GCG	CG>TA_CGACCCA	7	TRUE	FALSE
171_v.txt	32780	32780-SNV-C-T	SNV	1	C	T	70	30555	0.229095	48.3429	rnr1D57N	FALSE	CAN	JSY14	1A	rnr1D57N-Rep1A	CCC	C>T	A/T+1	G/C-1	CG>TA	CG>TA	AGCGACCCAGAAC	CCAGAAC	GGG	CCC	C	A	C>T	C>T_CCC	CG>TA_CCAGAAC	7	TRUE	FALSE
171_v.txt	32788	32788-SNV-C-T	SNV	1	C	T	13	30555	0.0425462	40.6154	rnr1D57N	FALSE	CAN	JSY14	1A	rnr1D57N-Rep1A	TCG	C>T	A/T+1	G/C-1	CG>TA	CG>TA	AGAACTCGAATTC	CGAATTC	AGC	TCG	C	A	C>T	C>T_TCG	CG>TA_CGAATTC	7	TRUE	FALSE
171_v.txt	32794	32794-SNV-C-T	SNV	1	C	T	31	30555	0.101456	36.7742	rnr1D57N	FALSE	CAN	JSY14	1A	rnr1D57N-Rep1A	TCA	C>T	A/T+1	G/C-1	CG>TA	CG>TA	CGAATTCACCGTA	CACCGTA	AGT	TCA	C	A	C>T	C>T_TCA	CG>TA_CACCGTA	7	TRUE	FALSE
171_v.txt	32797	32797-SNV-C-T	SNV	1	C	T	27	30555	0.0883652	48.6207	rnr1D57N	FALSE	CAN	JSY14	1A	rnr1D57N-Rep1A	CCG	C>T	A/T+1	G/C-1	CG>TA	CG>TA	ATTCACCGTAATA	CGTAATA	GGC	CCG	C	A	C>T	C>T_CCG	CG>TA_CGTAATA	7	TRUE	FALSE
171_v.txt	32798	32798-SNV-G-A	SNV	1	G	A	40	30554	0.130916	48.6	rnr1D57N	FALSE	CAN	JSY14	1A	rnr1D57N-Rep1A	CGT	G>A	A/T+1	G/C-1	CG>TA	CG>TA	TTCACCGTAATAT	GTAATAT	GCA	GCA	C	T	C>T	C>T_GCA	CG>TA_GTAATAT	7	TRUE	FALSE
171_v.txt	32809	32809-SNV-C-T	SNV	1	C	T	8	30555	0.0261823	53.25	rnr1D57N	FALSE	CAN	JSY14	1A	rnr1D57N-Rep1A	ACA	C>T	A/T+1	G/C-1	CG>TA	CG>TA	ATTTGACAGGGAA	CAGGGAA	TGT	ACA	C	A	C>T	C>T_ACA	CG>TA_CAGGGAA	7	TRUE	FALSE
171_v.txt	32841	32841-SNV-C-T	SNV	1	C	T	2484	30555	8.1296	42.7708	rnr1D57N	FALSE	CAN	JSY14	1A	rnr1D57N-Rep1A	CCA	C>T	A/T+1	G/C-1	CG>TA	CG>TA	ATTACCCAAAAAA	CAAAAAA	GGT	CCA	C	A	C>T	C>T_CCA	CG>TA_CAAAAAA	7	TRUE	FALSE
171_v.txt	32855	32855-SNV-C-T	SNV	1	C	T	191	30553	0.625143	35.7225	rnr1D57N	FALSE	CAN	JSY14	1A	rnr1D57N-Rep1A	TCC	C>T	A/T+1	G/C-1	CG>TA	CG>TA	ACTAATCCATGCC	CCATGCC	AGG	TCC	C	A	C>T	C>T_TCC	CG>TA_CCATGCC	7	TRUE	FALSE
171_v.txt	32860	32860-SNV-C-T	SNV	1	C	T	29	30552	0.0949201	36.1034	rnr1D57N	FALSE	CAN	JSY14	1A	rnr1D57N-Rep1A	GCC	C>T	A/T+1	G/C-1	CG>TA	CG>TA	TCCATGCCGCCAG	CCGCCAG	CGG	GCC	C	A	C>T	C>T_GCC	CG>TA_CCGCCAG	7	TRUE	FALSE
171_v.txt	32862	32862-SNV-G-A	SNV	1	G	A	25	30552	0.0818277	36.32	rnr1D57N	FALSE	CAN	JSY14	1A	rnr1D57N-Rep1A	CGC	G>A	A/T+1	G/C-1	CG>TA	CG>TA	CATGCCGCCAGTG	GCCAGTG	GCG	GCG	C	T	C>T	C>T_GCG	CG>TA_GCCAGTG	7	TRUE	FALSE
171_v.txt	32883	32883-SNV-C-T	SNV	1	C	T	36	31348	0.11484	35.9722	rnr1D57N	FALSE	CAN	JSY14	1A	rnr1D57N-Rep1A	CCA	C>T	A/T+1	G/C-1	CG>TA	CG>TA	TACGTCCAAAATT	CAAAATT	GGT	CCA	C	A	C>T	C>T_CCA	CG>TA_CAAAATT	7	TRUE	FALSE
171_v.txt	32900	32900-SNV-G-A	SNV	1	G	A	32	31348	0.10208	35.207	rnr1D57N	FALSE	CAN	JSY14	1A	rnr1D57N-Rep1A	GGC	G>A	A/T+1	G/C-1	CG>TA	CG>TA	GACTTGGCCAACT	GCCAACT	CCG	CCG	C	T	C>T	C>T_CCG	CG>TA_GCCAACT	7	TRUE	FALSE
171_v.txt	32901	32901-SNV-C-T	SNV	1	C	T	72	31348	0.22968	32.4532	rnr1D57N	FALSE	CAN	JSY14	1A	rnr1D57N-Rep1A	GCC	C>T	A/T+1	G/C-1	CG>TA	CG>TA	ACTTGGCCAACTA	CCAACTA	CGG	GCC	C	A	C>T	C>T_GCC	CG>TA_CCAACTA	7	TRUE	FALSE
171_v.txt	32914	32914-SNV-G-A	SNV	1	G	A	2	31348	0.00638	24.5	rnr1D57N	FALSE	CAN	JSY14	1A	rnr1D57N-Rep1A	AGT	G>A	A/T+1	G/C-1	CG>TA	CG>TA	CACTAAGTTCCAG	GTTCCAG	TCA	TCA	C	T	C>T	C>T_TCA	CG>TA_GTTCCAG	7	TRUE	FALSE
171_v.txt	32917	32917-SNV-C-T	SNV	1	C	T	92	31348	0.29348	46.4674	rnr1D57N	FALSE	CAN	JSY14	1A	rnr1D57N-Rep1A	TCC	C>T	A/T+1	G/C-1	CG>TA	CG>TA	TAAGTTCCAGGGC	CCAGGGC	AGG	TCC	C	A	C>T	C>T_TCC	CG>TA_CCAGGGC	7	TRUE	FALSE
171_v.txt	32934	32934-SNV-G-A	SNV	1	G	A	18	31348	0.0574199	41.0406	rnr1D57N	FALSE	CAN	JSY14	1A	rnr1D57N-Rep1A	TGC	G>A	A/T+1	G/C-1	CG>TA	CG>TA	GTGATTGCCCAAG	GCCCAAG	ACG	ACG	C	T	C>T	C>T_ACG	CG>TA_GCCCAAG	7	TRUE	FALSE
171_v.txt	32935	32935-SNV-C-T	SNV	1	C	T	30	31348	0.0956999	36.8661	rnr1D57N	FALSE	CAN	JSY14	1A	rnr1D57N-Rep1A	GCC	C>T	A/T+1	G/C-1	CG>TA	CG>TA	TGATTGCCCAAGA	CCCAAGA	CGG	GCC	C	A	C>T	C>T_GCC	CG>TA_CCCAAGA	7	TRUE	FALSE
171_v.txt	32945	32945-SNV-C-T	SNV	1	C	T	58	31348	0.18502	55.5517	rnr1D57N	FALSE	CAN	JSY14	1A	rnr1D57N-Rep1A	ACC	C>T	A/T+1	G/C-1	CG>TA	CG>TA	AGAAAACCAATAC	CCAATAC	TGG	ACC	C	A	C>T	C>T_ACC	CG>TA_CCAATAC	7	TRUE	FALSE
171_v.txt	32958	32958-SNV-C-T	SNV	1	C	T	46	31348	0.14674	44.9132	rnr1D57N	FALSE	CAN	JSY14	1A	rnr1D57N-Rep1A	ACC	C>T	A/T+1	G/C-1	CG>TA	CG>TA	ATGTAACCATTGG	CCATTGG	TGG	ACC	C	A	C>T	C>T_ACC	CG>TA_CCATTGG	7	TRUE	FALSE
171_v.txt	32965	32965-SNV-C-T	SNV	1	C	T	30	31348	0.0956999	56.2667	rnr1D57N	FALSE	CAN	JSY14	1A	rnr1D57N-Rep1A	GCC	C>T	A/T+1	G/C-1	CG>TA	CG>TA	CATTGGCCGCACC	CCGCACC	CGG	GCC	C	A	C>T	C>T_GCC	CG>TA_CCGCACC	7	TRUE	FALSE
171_v.txt	32967	32967-SNV-G-A	SNV	1	G	A	68	31348	0.21692	60.9853	rnr1D57N	FALSE	CAN	JSY14	1A	rnr1D57N-Rep1A	CGC	G>A	A/T+1	G/C-1	CG>TA	CG>TA	TTGGCCGCACCAA	GCACCAA	GCG	GCG	C	T	C>T	C>T_GCG	CG>TA_GCACCAA	7	TRUE	FALSE
171_v.txt	32970	32970-SNV-C-T	SNV	1	C	T	33	31348	0.10527	60.7879	rnr1D57N	FALSE	CAN	JSY14	1A	rnr1D57N-Rep1A	ACC	C>T	A/T+1	G/C-1	CG>TA	CG>TA	GCCGCACCAAATG	CCAAATG	TGG	ACC	C	A	C>T	C>T_ACC	CG>TA_CCAAATG	7	TRUE	FALSE
171_v.txt	32977	32977-SNV-C-T	SNV	1	C	T	22	31348	0.0701799	56.7273	rnr1D57N	FALSE	CAN	JSY14	1A	rnr1D57N-Rep1A	GCT	C>T	A/T+1	G/C-1	CG>TA	CG>TA	CAAATGCTGGAGA	CTGGAGA	CGA	GCT	C	A	C>T	C>T_GCT	CG>TA_CTGGAGA	7	TRUE	FALSE
171_v.txt	32979	32979-SNV-G-A	SNV	1	G	A	6	31348	0.01914	52.3333	rnr1D57N	FALSE	CAN	JSY14	1A	rnr1D57N-Rep1A	TGG	G>A	A/T+1	G/C-1	CG>TA	CG>TA	AATGCTGGAGAAA	GGAGAAA	ACC	ACC	C	T	C>T	C>T_ACC	CG>TA_GGAGAAA	7	TRUE	FALSE
171_v.txt	32980	32980-SNV-G-A	SNV	1	G	A	6	31348	0.01914	51.9997	rnr1D57N	FALSE	CAN	JSY14	1A	rnr1D57N-Rep1A	GGA	G>A	A/T+1	G/C-1	CG>TA	CG>TA	ATGCTGGAGAAAG	GAGAAAG	CCT	CCT	C	T	C>T	C>T_CCT	CG>TA_GAGAAAG	7	TRUE	FALSE
171_v.txt	33015	33015-SNV-G-A	SNV	1	G	A	2751	31348	8.77568	61.3315	rnr1D57N	FALSE	CAN	JSY14	1A	rnr1D57N-Rep1A	GGA	G>A	A/T+1	G/C-1	CG>TA	CG>TA	AAAGAGGATGTAA	GATGTAA	CCT	CCT	C	T	C>T	C>T_CCT	CG>TA_GATGTAA	7	TRUE	FALSE
171_v.txt	33037	33037-SNV-C-T	SNV	1	C	T	15	31348	0.0478499	58.9333	rnr1D57N	FALSE	CAN	JSY14	1A	rnr1D57N-Rep1A	GCC	C>T	A/T+1	G/C-1	CG>TA	CG>TA	ATGTAGCCATTTC	CCATTTC	CGG	GCC	C	A	C>T	C>T_GCC	CG>TA_CCATTTC	7	TRUE	FALSE
171_v.txt	33055	33055-SNV-G-A	SNV	1	G	A	69	31348	0.22011	58.1742	rnr1D57N	FALSE	CAN	JSY14	1A	rnr1D57N-Rep1A	TGC	G>A	A/T+1	G/C-1	CG>TA	CG>TA	AGGACTGCGTGAC	GCGTGAC	ACG	ACG	C	T	C>T	C>T_ACG	CG>TA_GCGTGAC	7	TRUE	FALSE
171_v.txt	33056	33056-SNV-C-T	SNV	1	C	T	36	31347	0.114844	55.3022	rnr1D57N	FALSE	CAN	JSY14	1A	rnr1D57N-Rep1A	GCG	C>T	A/T+1	G/C-1	CG>TA	CG>TA	GGACTGCGTGACA	CGTGACA	CGC	GCG	C	A	C>T	C>T_GCG	CG>TA_CGTGACA	7	TRUE	FALSE
171_v.txt	33070	33070-SNV-C-T	SNV	1	C	T	30	31348	0.0956999	52.6	rnr1D57N	FALSE	CAN	JSY14	1A	rnr1D57N-Rep1A	GCC	C>T	A/T+1	G/C-1	CG>TA	CG>TA	AATATGCCAAAGA	CCAAAGA	CGG	GCC	C	A	C>T	C>T_GCC	CG>TA_CCAAAGA	7	TRUE	FALSE
171_v.txt	33075	33075-SNV-G-A	SNV	1	G	A	29	31348	0.0925099	46.7586	rnr1D57N	FALSE	CAN	JSY14	1A	rnr1D57N-Rep1A	AGA	G>A	A/T+1	G/C-1	CG>TA	CG>TA	GCCAAAGAACCCA	GAACCCA	TCT	TCT	C	T	C>T	C>T_TCT	CG>TA_GAACCCA	7	TRUE	FALSE
171_v.txt	33114	33114-SNV-C-T	SNV	1	C	T	243	31348	0.775169	44.214	rnr1D57N	FALSE	CAN	JSY14	1A	rnr1D57N-Rep1A	GCC	C>T	A/T+1	G/C-1	CG>TA	CG>TA	ACTGGGCCGGCGT	CCGGCGT	CGG	GCC	C	A	C>T	C>T_GCC	CG>TA_CCGGCGT	7	TRUE	FALSE
171_v.txt	33115	33115-SNV-C-T	SNV	1	C	T	231	31348	0.736889	43.961	rnr1D57N	FALSE	CAN	JSY14	1A	rnr1D57N-Rep1A	CCG	C>T	A/T+1	G/C-1	CG>TA	CG>TA	CTGGGCCGGCGTT	CGGCGTT	GGC	CCG	C	A	C>T	C>T_CCG	CG>TA_CGGCGTT	7	TRUE	FALSE
171_v.txt	33118	33118-SNV-C-T	SNV	1	C	T	25	31348	0.0797499	40.08	rnr1D57N	FALSE	CAN	JSY14	1A	rnr1D57N-Rep1A	GCG	C>T	A/T+1	G/C-1	CG>TA	CG>TA	GGCCGGCGTTGGT	CGTTGGT	CGC	GCG	C	A	C>T	C>T_GCG	CG>TA_CGTTGGT	7	TRUE	FALSE
171_v.txt	33153	33153-SNV-C-T	SNV	1	C	T	70	31348	0.2233	36.3573	rnr1D57N	FALSE	CAN	JSY14	1A	rnr1D57N-Rep1A	ACC	C>T	A/T+1	G/C-1	CG>TA	CG>TA	AAAAGACCTGTAC	CCTGTAC	TGG	ACC	C	A	C>T	C>T_ACC	CG>TA_CCTGTAC	7	TRUE	FALSE
171_v.txt	33156	33156-SNV-G-A	SNV	1	G	A	714	31344	2.27795	37.3319	rnr1D57N	FALSE	CAN	JSY14	1A	rnr1D57N-Rep1A	TGT	G>A	A/T+1	G/C-1	CG>TA	CG>TA	AGACCTGTACCAA	GTACCAA	ACA	ACA	C	T	C>T	C>T_ACA	CG>TA_GTACCAA	7	TRUE	FALSE
171_v.txt	33159	33159-SNV-C-T	SNV	1	C	T	207	31342	0.660456	36.7855	rnr1D57N	FALSE	CAN	JSY14	1A	rnr1D57N-Rep1A	ACC	C>T	A/T+1	G/C-1	CG>TA	CG>TA	CCTGTACCAATAG	CCAATAG	TGG	ACC	C	A	C>T	C>T_ACC	CG>TA_CCAATAG	7	TRUE	FALSE
171_v.txt	33168	33168-SNV-C-T	SNV	1	C	T	101	31300	0.322684	37.2339	rnr1D57N	FALSE	CAN	JSY14	1A	rnr1D57N-Rep1A	ACC	C>T	A/T+1	G/C-1	CG>TA	CG>TA	ATAGTACCACCAA	CCACCAA	TGG	ACC	C	A	C>T	C>T_ACC	CG>TA_CCACCAA	7	TRUE	FALSE
171_v.txt	33177	33177-SNV-G-A	SNV	1	G	A	36	31297	0.115027	36.1111	rnr1D57N	FALSE	CAN	JSY14	1A	rnr1D57N-Rep1A	GGC	G>A	A/T+1	G/C-1	CG>TA	CG>TA	CCAAGGGCAATCA	GCAATCA	CCG	CCG	C	T	C>T	C>T_CCG	CG>TA_GCAATCA	7	TRUE	FALSE
171_v.txt	33178	33178-SNV-C-T	SNV	1	C	T	15	31295	0.047931	36.4001	rnr1D57N	FALSE	CAN	JSY14	1A	rnr1D57N-Rep1A	GCA	C>T	A/T+1	G/C-1	CG>TA	CG>TA	CAAGGGCAATCAT	CAATCAT	CGT	GCA	C	A	C>T	C>T_GCA	CG>TA_CAATCAT	7	TRUE	FALSE
171_v.txt	33199	33199-SNV-G-A	SNV	1	G	A	17	13895	0.122346	36.2941	rnr1D57N	FALSE	CAN	JSY14	1A	rnr1D57N-Rep1A	TGC	G>A	A/T+1	G/C-1	CG>TA	CG>TA	GTCTTTGCTTAAG	GCTTAAG	ACG	ACG	C	T	C>T	C>T_ACG	CG>TA_GCTTAAG	7	TRUE	FALSE
171_v.txt	33229	33229-SNV-G-A	SNV	1	G	A	109	13904	0.783947	35.3119	rnr1D57N	FALSE	CAN	JSY14	1A	rnr1D57N-Rep1A	TGT	G>A	A/T+1	G/C-1	CG>TA	CG>TA	CGTTCTGTACTTC	GTACTTC	ACA	ACA	C	T	C>T	C>T_ACA	CG>TA_GTACTTC	7	TRUE	FALSE
171_v.txt	33276	33276-SNV-G-A	SNV	1	G	A	25	13904	0.179804	39.52	rnr1D57N	FALSE	CAN	JSY14	1A	rnr1D57N-Rep1A	CGT	G>A	A/T+1	G/C-1	CG>TA	CG>TA	GAGAACGTATCCT	GTATCCT	GCA	GCA	C	T	C>T	C>T_GCA	CG>TA_GTATCCT	7	TRUE	FALSE
171_v.txt	33309	33309-SNV-C-T	SNV	1	C	T	15	13904	0.107883	54.7292	rnr1D57N	FALSE	CAN	JSY14	1A	rnr1D57N-Rep1A	GCG	C>T	A/T+1	G/C-1	CG>TA	CG>TA	AAAGAGCGCAATG	CGCAATG	CGC	GCG	C	A	C>T	C>T_GCG	CG>TA_CGCAATG	7	TRUE	FALSE
171_v.txt	33310	33310-SNV-G-A	SNV	1	G	A	18	13903	0.129468	55.7133	rnr1D57N	FALSE	CAN	JSY14	1A	rnr1D57N-Rep1A	CGC	G>A	A/T+1	G/C-1	CG>TA	CG>TA	AAGAGCGCAATGG	GCAATGG	GCG	GCG	C	T	C>T	C>T_GCG	CG>TA_GCAATGG	7	TRUE	FALSE
171_v.txt	33354	33354-SNV-G-A	SNV	1	G	A	4	13896	0.0287853	47.7227	rnr1D57N	FALSE	CAN	JSY14	1A	rnr1D57N-Rep1A	TGA	G>A	A/T+1	G/C-1	CG>TA	CG>TA	GGTATTGACCCAC	GACCCAC	ACT	ACT	C	T	C>T	C>T_ACT	CG>TA_GACCCAC	7	TRUE	FALSE
171_v.txt	33382	33382-SNV-C-T	SNV	1	C	T	17	13904	0.122267	56.1765	rnr1D57N	FALSE	CAN	JSY14	1A	rnr1D57N-Rep1A	GCT	C>T	A/T+1	G/C-1	CG>TA	CG>TA	GTGAAGCTTCAAC	CTTCAAC	CGA	GCT	C	A	C>T	C>T_GCT	CG>TA_CTTCAAC	7	TRUE	FALSE
171_v.txt	33412	33412-SNV-G-A	SNV	1	G	A	15	13904	0.107883	51.6	rnr1D57N	FALSE	CAN	JSY14	1A	rnr1D57N-Rep1A	GGC	G>A	A/T+1	G/C-1	CG>TA	CG>TA	TGACCGGCTCATT	GCTCATT	CCG	CCG	C	T	C>T	C>T_CCG	CG>TA_GCTCATT	7	TRUE	FALSE
171_v.txt	33474	33474-SNV-C-T	SNV	1	C	T	18	13903	0.129468	36.6111	rnr1D57N	FALSE	CAN	JSY14	1A	rnr1D57N-Rep1A	GCC	C>T	A/T+1	G/C-1	CG>TA	CG>TA	GCTATGCCTTTTT	CCTTTTT	CGG	GCC	C	A	C>T	C>T_GCC	CG>TA_CCTTTTT	7	TRUE	FALSE
171_v.txt	31806	31806-SNV-C-G	SNV	1	C	G	1	10178	0.00983	63.9945	rnr1D57N	FALSE	CAN	JSY14	1A	rnr1D57N-Rep1A	CCA	C>G	G/C+1	G/C-1	CG>GC	CG>GC	ATCTTCCAAATAA	CAAATAA	GGT	CCA	C	C	C>G	C>G_CCA	CG>GC_CAAATAA	7	TRUE	FALSE
171_v.txt	32064	32064-SNV-G-C	SNV	1	G	C	65	24202	0.268573	62.3385	rnr1D57N	FALSE	CAN	JSY14	1A	rnr1D57N-Rep1A	TGA	G>C	G/C+1	G/C-1	CG>GC	CG>GC	GAGATTGAGATAA	GAGATAA	ACT	ACT	C	G	C>G	C>G_ACT	CG>GC_GAGATAA	7	TRUE	FALSE
171_v.txt	32164	32164-SNV-C-G	SNV	1	C	G	1	24202	0.00413	37.9989	rnr1D57N	FALSE	CAN	JSY14	1A	rnr1D57N-Rep1A	GCG	C>G	G/C+1	G/C-1	CG>GC	CG>GC	CCAAAGCGCCAAA	CGCCAAA	CGC	GCG	C	C	C>G	C>G_GCG	CG>GC_CGCCAAA	7	TRUE	FALSE
171_v.txt	32223	32223-SNV-G-C	SNV	1	G	C	6	24202	0.0247913	37.8333	rnr1D57N	FALSE	CAN	JSY14	1A	rnr1D57N-Rep1A	TGA	G>C	G/C+1	G/C-1	CG>GC	CG>GC	GTCCTTGACAGGA	GACAGGA	ACT	ACT	C	G	C>G	C>G_ACT	CG>GC_GACAGGA	7	TRUE	FALSE
171_v.txt	32272	32272-SNV-G-C	SNV	1	G	C	46	31385	0.146567	35.9348	rnr1D57N	FALSE	CAN	JSY14	1A	rnr1D57N-Rep1A	CGG	G>C	G/C+1	G/C-1	CG>GC	CG>GC	AAATACGGGAACC	GGGAACC	GCC	GCC	C	G	C>G	C>G_GCC	CG>GC_GGGAACC	7	TRUE	FALSE
171_v.txt	32278	32278-SNV-C-G	SNV	1	C	G	81	31385	0.258085	35.8519	rnr1D57N	FALSE	CAN	JSY14	1A	rnr1D57N-Rep1A	CCA	C>G	G/C+1	G/C-1	CG>GC	CG>GC	GGGAACCAACGTA	CAACGTA	GGT	CCA	C	C	C>G	C>G_CCA	CG>GC_CAACGTA	7	TRUE	FALSE
171_v.txt	32292	32292-SNV-G-C	SNV	1	G	C	12	31383	0.0382373	52.9149	rnr1D57N	FALSE	CAN	JSY14	1A	rnr1D57N-Rep1A	TGA	G>C	G/C+1	G/C-1	CG>GC	CG>GC	ATATTTGAATTTG	GAATTTG	ACT	ACT	C	G	C>G	C>G_ACT	CG>GC_GAATTTG	7	TRUE	FALSE
171_v.txt	32316	32316-SNV-G-C	SNV	1	G	C	8	31383	0.0254915	63.625	rnr1D57N	FALSE	CAN	JSY14	1A	rnr1D57N-Rep1A	TGT	G>C	G/C+1	G/C-1	CG>GC	CG>GC	ATGGTTGTTAAGA	GTTAAGA	ACA	ACA	C	G	C>G	C>G_ACA	CG>GC_GTTAAGA	7	TRUE	FALSE
171_v.txt	32399	32399-SNV-G-C	SNV	1	G	C	13	31383	0.0414237	61.7692	rnr1D57N	FALSE	CAN	JSY14	1A	rnr1D57N-Rep1A	CGT	G>C	G/C+1	G/C-1	CG>GC	CG>GC	AGAAACGTAGGAA	GTAGGAA	GCA	GCA	C	G	C>G	C>G_GCA	CG>GC_GTAGGAA	7	TRUE	FALSE
171_v.txt	32432	32432-SNV-G-C	SNV	1	G	C	84	31383	0.267661	55	rnr1D57N	FALSE	CAN	JSY14	1A	rnr1D57N-Rep1A	TGT	G>C	G/C+1	G/C-1	CG>GC	CG>GC	GTCATTGTATGGA	GTATGGA	ACA	ACA	C	G	C>G	C>G_ACA	CG>GC_GTATGGA	7	TRUE	FALSE
171_v.txt	32449	32449-SNV-C-G	SNV	1	C	G	20	31383	0.0637288	50.5	rnr1D57N	FALSE	CAN	JSY14	1A	rnr1D57N-Rep1A	CCA	C>G	G/C+1	G/C-1	CG>GC	CG>GC	AAAGTCCAATGAA	CAATGAA	GGT	CCA	C	C	C>G	C>G_CCA	CG>GC_CAATGAA	7	TRUE	FALSE
171_v.txt	32471	32471-SNV-G-C	SNV	1	G	C	38	31383	0.121085	46.8158	rnr1D57N	FALSE	CAN	JSY14	1A	rnr1D57N-Rep1A	TGT	G>C	G/C+1	G/C-1	CG>GC	CG>GC	GCCAATGTAGAAG	GTAGAAG	ACA	ACA	C	G	C>G	C>G_ACA	CG>GC_GTAGAAG	7	TRUE	FALSE
171_v.txt	32487	32487-SNV-C-G	SNV	1	C	G	29	31383	0.0924067	42.4123	rnr1D57N	FALSE	CAN	JSY14	1A	rnr1D57N-Rep1A	ACG	C>G	G/C+1	G/C-1	CG>GC	CG>GC	AAGATACGGAAAA	CGGAAAA	TGC	ACG	C	C	C>G	C>G_ACG	CG>GC_CGGAAAA	7	TRUE	FALSE
171_v.txt	32539	32539-SNV-C-G	SNV	1	C	G	39	31383	0.124271	35.9231	rnr1D57N	FALSE	CAN	JSY14	1A	rnr1D57N-Rep1A	GCT	C>G	G/C+1	G/C-1	CG>GC	CG>GC	TTGCAGCTTCACC	CTTCACC	CGA	GCT	C	C	C>G	C>G_GCT	CG>GC_CTTCACC	7	TRUE	FALSE
171_v.txt	32544	32544-SNV-C-G	SNV	1	C	G	11	31383	0.0350508	36.6359	rnr1D57N	FALSE	CAN	JSY14	1A	rnr1D57N-Rep1A	ACC	C>G	G/C+1	G/C-1	CG>GC	CG>GC	GCTTCACCAGCAG	CCAGCAG	TGG	ACC	C	C	C>G	C>G_ACC	CG>GC_CCAGCAG	7	TRUE	FALSE
171_v.txt	32545	32545-SNV-C-G	SNV	1	C	G	3	31383	0.00956	38	rnr1D57N	FALSE	CAN	JSY14	1A	rnr1D57N-Rep1A	CCA	C>G	G/C+1	G/C-1	CG>GC	CG>GC	CTTCACCAGCAGT	CAGCAGT	GGT	CCA	C	C	C>G	C>G_CCA	CG>GC_CAGCAGT	7	TRUE	FALSE
171_v.txt	32552	32552-SNV-G-C	SNV	1	G	C	1	31378	0.00319	30.8604	rnr1D57N	FALSE	CAN	JSY14	1A	rnr1D57N-Rep1A	TGA	G>C	G/C+1	G/C-1	CG>GC	CG>GC	AGCAGTGATACCA	GATACCA	ACT	ACT	C	G	C>G	C>G_ACT	CG>GC_GATACCA	7	TRUE	FALSE
171_v.txt	32557	32557-SNV-C-G	SNV	1	C	G	10	31372	0.0318756	35.1	rnr1D57N	FALSE	CAN	JSY14	1A	rnr1D57N-Rep1A	CCA	C>G	G/C+1	G/C-1	CG>GC	CG>GC	TGATACCAACTAG	CAACTAG	GGT	CCA	C	C	C>G	C>G_CCA	CG>GC_CAACTAG	7	TRUE	FALSE
171_v.txt	32743	32743-SNV-G-C	SNV	1	G	C	39	30555	0.127639	55.0256	rnr1D57N	FALSE	CAN	JSY14	1A	rnr1D57N-Rep1A	AGA	G>C	G/C+1	G/C-1	CG>GC	CG>GC	ATATTAGAAACCC	GAAACCC	TCT	TCT	C	G	C>G	C>G_TCT	CG>GC_GAAACCC	7	TRUE	FALSE
171_v.txt	32758	32758-SNV-C-G	SNV	1	C	G	12	30555	0.0392734	54.5823	rnr1D57N	FALSE	CAN	JSY14	1A	rnr1D57N-Rep1A	GCT	C>G	G/C+1	G/C-1	CG>GC	CG>GC	TAATGGCTAAAAC	CTAAAAC	CGA	GCT	C	C	C>G	C>G_GCT	CG>GC_CTAAAAC	7	TRUE	FALSE
171_v.txt	32776	32776-SNV-C-G	SNV	1	C	G	54	30554	0.176736	51.2778	rnr1D57N	FALSE	CAN	JSY14	1A	rnr1D57N-Rep1A	GCG	C>G	G/C+1	G/C-1	CG>GC	CG>GC	TGGAAGCGACCCA	CGACCCA	CGC	GCG	C	C	C>G	C>G_GCG	CG>GC_CGACCCA	7	TRUE	FALSE
171_v.txt	32794	32794-SNV-C-G	SNV	1	C	G	5	30555	0.0163639	40.6	rnr1D57N	FALSE	CAN	JSY14	1A	rnr1D57N-Rep1A	TCA	C>G	G/C+1	G/C-1	CG>GC	CG>GC	CGAATTCACCGTA	CACCGTA	AGT	TCA	C	C	C>G	C>G_TCA	CG>GC_CACCGTA	7	TRUE	FALSE
171_v.txt	32798	32798-SNV-G-C	SNV	1	G	C	8	30554	0.0261832	38.625	rnr1D57N	FALSE	CAN	JSY14	1A	rnr1D57N-Rep1A	CGT	G>C	G/C+1	G/C-1	CG>GC	CG>GC	TTCACCGTAATAT	GTAATAT	GCA	GCA	C	G	C>G	C>G_GCA	CG>GC_GTAATAT	7	TRUE	FALSE
171_v.txt	32809	32809-SNV-C-G	SNV	1	C	G	40	30555	0.130911	44.625	rnr1D57N	FALSE	CAN	JSY14	1A	rnr1D57N-Rep1A	ACA	C>G	G/C+1	G/C-1	CG>GC	CG>GC	ATTTGACAGGGAA	CAGGGAA	TGT	ACA	C	C	C>G	C>G_ACA	CG>GC_CAGGGAA	7	TRUE	FALSE
171_v.txt	32811	32811-SNV-G-C	SNV	1	G	C	393	30555	1.28621	44.1043	rnr1D57N	FALSE	CAN	JSY14	1A	rnr1D57N-Rep1A	AGG	G>C	G/C+1	G/C-1	CG>GC	CG>GC	TTGACAGGGAACA	GGGAACA	TCC	TCC	C	G	C>G	C>G_TCC	CG>GC_GGGAACA	7	TRUE	FALSE
171_v.txt	32876	32876-SNV-G-C	SNV	1	G	C	14	31336	0.044677	37.9286	rnr1D57N	FALSE	CAN	JSY14	1A	rnr1D57N-Rep1A	TGT	G>C	G/C+1	G/C-1	CG>GC	CG>GC	AACTTTGTACGTC	GTACGTC	ACA	ACA	C	G	C>G	C>G_ACA	CG>GC_GTACGTC	7	TRUE	FALSE
171_v.txt	32935	32935-SNV-C-G	SNV	1	C	G	1	31348	0.00319	36.999	rnr1D57N	FALSE	CAN	JSY14	1A	rnr1D57N-Rep1A	GCC	C>G	G/C+1	G/C-1	CG>GC	CG>GC	TGATTGCCCAAGA	CCCAAGA	CGG	GCC	C	C	C>G	C>G_GCC	CG>GC_CCCAAGA	7	TRUE	FALSE
171_v.txt	32937	32937-SNV-C-G	SNV	1	C	G	21	31348	0.0669899	56.1449	rnr1D57N	FALSE	CAN	JSY14	1A	rnr1D57N-Rep1A	CCA	C>G	G/C+1	G/C-1	CG>GC	CG>GC	ATTGCCCAAGAAA	CAAGAAA	GGT	CCA	C	C	C>G	C>G_CCA	CG>GC_CAAGAAA	7	TRUE	FALSE
171_v.txt	32959	32959-SNV-C-G	SNV	1	C	G	44	31347	0.140364	57.2143	rnr1D57N	FALSE	CAN	JSY14	1A	rnr1D57N-Rep1A	CCA	C>G	G/C+1	G/C-1	CG>GC	CG>GC	TGTAACCATTGGC	CATTGGC	GGT	CCA	C	C	C>G	C>G_CCA	CG>GC_CATTGGC	7	TRUE	FALSE
171_v.txt	32967	32967-SNV-G-C	SNV	1	G	C	4	31348	0.01276	51	rnr1D57N	FALSE	CAN	JSY14	1A	rnr1D57N-Rep1A	CGC	G>C	G/C+1	G/C-1	CG>GC	CG>GC	TTGGCCGCACCAA	GCACCAA	GCG	GCG	C	G	C>G	C>G_GCG	CG>GC_GCACCAA	7	TRUE	FALSE
171_v.txt	32971	32971-SNV-C-G	SNV	1	C	G	17	31348	0.0542299	60.4713	rnr1D57N	FALSE	CAN	JSY14	1A	rnr1D57N-Rep1A	CCA	C>G	G/C+1	G/C-1	CG>GC	CG>GC	CCGCACCAAATGC	CAAATGC	GGT	CCA	C	C	C>G	C>G_CCA	CG>GC_CAAATGC	7	TRUE	FALSE
171_v.txt	32977	32977-SNV-C-G	SNV	1	C	G	16	31348	0.0510399	61.875	rnr1D57N	FALSE	CAN	JSY14	1A	rnr1D57N-Rep1A	GCT	C>G	G/C+1	G/C-1	CG>GC	CG>GC	CAAATGCTGGAGA	CTGGAGA	CGA	GCT	C	C	C>G	C>G_GCT	CG>GC_CTGGAGA	7	TRUE	FALSE
171_v.txt	32979	32979-SNV-G-C	SNV	1	G	C	5	31348	0.01595	27.2033	rnr1D57N	FALSE	CAN	JSY14	1A	rnr1D57N-Rep1A	TGG	G>C	G/C+1	G/C-1	CG>GC	CG>GC	AATGCTGGAGAAA	GGAGAAA	ACC	ACC	C	G	C>G	C>G_ACC	CG>GC_GGAGAAA	7	TRUE	FALSE
171_v.txt	32980	32980-SNV-G-C	SNV	1	G	C	1	31348	0.00319	20.9995	rnr1D57N	FALSE	CAN	JSY14	1A	rnr1D57N-Rep1A	GGA	G>C	G/C+1	G/C-1	CG>GC	CG>GC	ATGCTGGAGAAAG	GAGAAAG	CCT	CCT	C	G	C>G	C>G_CCT	CG>GC_GAGAAAG	7	TRUE	FALSE
171_v.txt	32997	32997-SNV-G-C	SNV	1	G	C	371	31348	1.18349	61.4124	rnr1D57N	FALSE	CAN	JSY14	1A	rnr1D57N-Rep1A	TGA	G>C	G/C+1	G/C-1	CG>GC	CG>GC	CTTTGTGAGAAAA	GAGAAAA	ACT	ACT	C	G	C>G	C>G_ACT	CG>GC_GAGAAAA	7	TRUE	FALSE
171_v.txt	33018	33018-SNV-G-C	SNV	1	G	C	21	31348	0.0669899	61.8571	rnr1D57N	FALSE	CAN	JSY14	1A	rnr1D57N-Rep1A	TGT	G>C	G/C+1	G/C-1	CG>GC	CG>GC	GAGGATGTAACAG	GTAACAG	ACA	ACA	C	G	C>G	C>G_ACA	CG>GC_GTAACAG	7	TRUE	FALSE
171_v.txt	33037	33037-SNV-C-G	SNV	1	C	G	17	31348	0.0542299	58	rnr1D57N	FALSE	CAN	JSY14	1A	rnr1D57N-Rep1A	GCC	C>G	G/C+1	G/C-1	CG>GC	CG>GC	ATGTAGCCATTTC	CCATTTC	CGG	GCC	C	C	C>G	C>G_GCC	CG>GC_CCATTTC	7	TRUE	FALSE
171_v.txt	33056	33056-SNV-C-G	SNV	1	C	G	2	31347	0.00638	47.9978	rnr1D57N	FALSE	CAN	JSY14	1A	rnr1D57N-Rep1A	GCG	C>G	G/C+1	G/C-1	CG>GC	CG>GC	GGACTGCGTGACA	CGTGACA	CGC	GCG	C	C	C>G	C>G_GCG	CG>GC_CGTGACA	7	TRUE	FALSE
171_v.txt	33070	33070-SNV-C-G	SNV	1	C	G	65	31348	0.20735	52.3231	rnr1D57N	FALSE	CAN	JSY14	1A	rnr1D57N-Rep1A	GCC	C>G	G/C+1	G/C-1	CG>GC	CG>GC	AATATGCCAAAGA	CCAAAGA	CGG	GCC	C	C	C>G	C>G_GCC	CG>GC_CCAAAGA	7	TRUE	FALSE
171_v.txt	33115	33115-SNV-C-G	SNV	1	C	G	10	31348	0.0319	39.5	rnr1D57N	FALSE	CAN	JSY14	1A	rnr1D57N-Rep1A	CCG	C>G	G/C+1	G/C-1	CG>GC	CG>GC	CTGGGCCGGCGTT	CGGCGTT	GGC	CCG	C	C	C>G	C>G_CCG	CG>GC_CGGCGTT	7	TRUE	FALSE
171_v.txt	33154	33154-SNV-C-G	SNV	1	C	G	22	31348	0.0701799	37.5439	rnr1D57N	FALSE	CAN	JSY14	1A	rnr1D57N-Rep1A	CCT	C>G	G/C+1	G/C-1	CG>GC	CG>GC	AAAGACCTGTACC	CTGTACC	GGA	CCT	C	C	C>G	C>G_CCT	CG>GC_CTGTACC	7	TRUE	FALSE
171_v.txt	33169	33169-SNV-C-G	SNV	1	C	G	3	31300	0.00959	37.9986	rnr1D57N	FALSE	CAN	JSY14	1A	rnr1D57N-Rep1A	CCA	C>G	G/C+1	G/C-1	CG>GC	CG>GC	TAGTACCACCAAG	CACCAAG	GGT	CCA	C	C	C>G	C>G_CCA	CG>GC_CACCAAG	7	TRUE	FALSE
171_v.txt	33205	33205-SNV-G-C	SNV	1	G	C	10	13895	0.0719683	36.9	rnr1D57N	FALSE	CAN	JSY14	1A	rnr1D57N-Rep1A	AGC	G>C	G/C+1	G/C-1	CG>GC	CG>GC	GCTTAAGCTCTCT	GCTCTCT	TCG	TCG	C	G	C>G	C>G_TCG	CG>GC_GCTCTCT	7	TRUE	FALSE
171_v.txt	33309	33309-SNV-C-G	SNV	1	C	G	1	13904	0.00719	63.9888	rnr1D57N	FALSE	CAN	JSY14	1A	rnr1D57N-Rep1A	GCG	C>G	G/C+1	G/C-1	CG>GC	CG>GC	AAAGAGCGCAATG	CGCAATG	CGC	GCG	C	C	C>G	C>G_GCG	CG>GC_CGCAATG	7	TRUE	FALSE
171_v.txt	33310	33310-SNV-G-C	SNV	1	G	C	3	13903	0.0215781	25.3344	rnr1D57N	FALSE	CAN	JSY14	1A	rnr1D57N-Rep1A	CGC	G>C	G/C+1	G/C-1	CG>GC	CG>GC	AAGAGCGCAATGG	GCAATGG	GCG	GCG	C	G	C>G	C>G_GCG	CG>GC_GCAATGG	7	TRUE	FALSE
171_v.txt	33456	33456-SNV-G-C	SNV	1	G	C	38	13904	0.273303	44.3158	rnr1D57N	FALSE	CAN	JSY14	1A	rnr1D57N-Rep1A	TGA	G>C	G/C+1	G/C-1	CG>GC	CG>GC	TCTTTTGAATTTG	GAATTTG	ACT	ACT	C	G	C>G	C>G_ACT	CG>GC_GAATTTG	7	TRUE	FALSE
171_v.txt	31869	31869-SNV-G-T	SNV	1	G	T	35	10179	0.343845	44.0571	rnr1D57N	FALSE	CAN	JSY14	1A	rnr1D57N-Rep1A	AGA	G>T	A/T+1	G/C-1	CG>AT	CG>AT	AAAATAGAGATAT	GAGATAT	TCT	TCT	C	A	C>A	C>A_TCT	CG>AT_GAGATAT	7	TRUE	FALSE
171_v.txt	32008	32008-SNV-C-A	SNV	1	C	A	25	24202	0.103297	44.44	rnr1D57N	FALSE	CAN	JSY14	1A	rnr1D57N-Rep1A	TCG	C>A	A/T+1	G/C-1	CG>AT	CG>AT	GTAACTCGTCACG	CGTCACG	AGC	TCG	C	T	C>A	C>A_TCG	CG>AT_CGTCACG	7	TRUE	FALSE
171_v.txt	32095	32095-SNV-C-A	SNV	1	C	A	65	24202	0.268573	59.8308	rnr1D57N	FALSE	CAN	JSY14	1A	rnr1D57N-Rep1A	ACA	C>A	A/T+1	G/C-1	CG>AT	CG>AT	CTGCAACACCAGT	CACCAGT	TGT	ACA	C	T	C>A	C>A_ACA	CG>AT_CACCAGT	7	TRUE	FALSE
171_v.txt	32114	32114-SNV-C-A	SNV	1	C	A	15	24202	0.0619783	39.6063	rnr1D57N	FALSE	CAN	JSY14	1A	rnr1D57N-Rep1A	GCC	C>A	A/T+1	G/C-1	CG>AT	CG>AT	TAATAGCCATTCG	CCATTCG	CGG	GCC	C	T	C>A	C>A_GCC	CG>AT_CCATTCG	7	TRUE	FALSE
171_v.txt	32119	32119-SNV-C-A	SNV	1	C	A	82	24202	0.338815	59.0591	rnr1D57N	FALSE	CAN	JSY14	1A	rnr1D57N-Rep1A	TCG	C>A	A/T+1	G/C-1	CG>AT	CG>AT	GCCATTCGAAAAC	CGAAAAC	AGC	TCG	C	T	C>A	C>A_TCG	CG>AT_CGAAAAC	7	TRUE	FALSE
171_v.txt	32120	32120-SNV-G-T	SNV	1	G	T	3	24202	0.0123957	63.9816	rnr1D57N	FALSE	CAN	JSY14	1A	rnr1D57N-Rep1A	CGA	G>T	A/T+1	G/C-1	CG>AT	CG>AT	CCATTCGAAAACT	GAAAACT	GCT	GCT	C	A	C>A	C>A_GCT	CG>AT_GAAAACT	7	TRUE	FALSE
171_v.txt	32149	32149-SNV-C-A	SNV	1	C	A	30	24202	0.123957	47.5069	rnr1D57N	FALSE	CAN	JSY14	1A	rnr1D57N-Rep1A	TCC	C>A	A/T+1	G/C-1	CG>AT	CG>AT	ATGTCTCCATGTA	CCATGTA	AGG	TCC	C	T	C>A	C>A_TCC	CG>AT_CCATGTA	7	TRUE	FALSE
171_v.txt	32150	32150-SNV-C-A	SNV	1	C	A	25	24202	0.103297	47.7252	rnr1D57N	FALSE	CAN	JSY14	1A	rnr1D57N-Rep1A	CCA	C>A	A/T+1	G/C-1	CG>AT	CG>AT	TGTCTCCATGTAA	CATGTAA	GGT	CCA	C	T	C>A	C>A_CCA	CG>AT_CATGTAA	7	TRUE	FALSE
171_v.txt	32153	32153-SNV-G-T	SNV	1	G	T	17	24202	0.0702421	53.4065	rnr1D57N	FALSE	CAN	JSY14	1A	rnr1D57N-Rep1A	TGT	G>T	A/T+1	G/C-1	CG>AT	CG>AT	CTCCATGTAAGCC	GTAAGCC	ACA	ACA	C	A	C>A	C>A_ACA	CG>AT_GTAAGCC	7	TRUE	FALSE
171_v.txt	32195	32195-SNV-G-T	SNV	1	G	T	30	24202	0.123957	43.0667	rnr1D57N	FALSE	CAN	JSY14	1A	rnr1D57N-Rep1A	TGT	G>T	A/T+1	G/C-1	CG>AT	CG>AT	TGCAATGTATGGA	GTATGGA	ACA	ACA	C	A	C>A	C>A_ACA	CG>AT_GTATGGA	7	TRUE	FALSE
171_v.txt	32272	32272-SNV-G-T	SNV	1	G	T	48	31385	0.152939	34.125	rnr1D57N	FALSE	CAN	JSY14	1A	rnr1D57N-Rep1A	CGG	G>T	A/T+1	G/C-1	CG>AT	CG>AT	AAATACGGGAACC	GGGAACC	GCC	GCC	C	A	C>A	C>A_GCC	CG>AT_GGGAACC	7	TRUE	FALSE
171_v.txt	32274	32274-SNV-G-T	SNV	1	G	T	324	31385	1.03234	36.1118	rnr1D57N	FALSE	CAN	JSY14	1A	rnr1D57N-Rep1A	GGA	G>T	A/T+1	G/C-1	CG>AT	CG>AT	ATACGGGAACCAA	GAACCAA	CCT	CCT	C	A	C>A	C>A_CCT	CG>AT_GAACCAA	7	TRUE	FALSE
171_v.txt	32292	32292-SNV-G-T	SNV	1	G	T	37	31383	0.117898	51.0262	rnr1D57N	FALSE	CAN	JSY14	1A	rnr1D57N-Rep1A	TGA	G>T	A/T+1	G/C-1	CG>AT	CG>AT	ATATTTGAATTTG	GAATTTG	ACT	ACT	C	A	C>A	C>A_ACT	CG>AT_GAATTTG	7	TRUE	FALSE
171_v.txt	32301	32301-SNV-G-T	SNV	1	G	T	29	31383	0.0924067	48.2069	rnr1D57N	FALSE	CAN	JSY14	1A	rnr1D57N-Rep1A	GGC	G>T	A/T+1	G/C-1	CG>AT	CG>AT	TTTGCGGCAGAAA	GCAGAAA	CCG	CCG	C	A	C>A	C>A_CCG	CG>AT_GCAGAAA	7	TRUE	FALSE
171_v.txt	32368	32368-SNV-C-A	SNV	1	C	A	40	31383	0.127458	55.6702	rnr1D57N	FALSE	CAN	JSY14	1A	rnr1D57N-Rep1A	TCA	C>A	A/T+1	G/C-1	CG>AT	CG>AT	AGTTCTCAATAGC	CAATAGC	AGT	TCA	C	T	C>A	C>A_TCA	CG>AT_CAATAGC	7	TRUE	FALSE
171_v.txt	32373	32373-SNV-G-T	SNV	1	G	T	36	31383	0.114712	58.9444	rnr1D57N	FALSE	CAN	JSY14	1A	rnr1D57N-Rep1A	AGC	G>T	A/T+1	G/C-1	CG>AT	CG>AT	TCAATAGCAATAA	GCAATAA	TCG	TCG	C	A	C>A	C>A_TCG	CG>AT_GCAATAA	7	TRUE	FALSE
171_v.txt	32399	32399-SNV-G-T	SNV	1	G	T	163	31383	0.519389	59.0184	rnr1D57N	FALSE	CAN	JSY14	1A	rnr1D57N-Rep1A	CGT	G>T	A/T+1	G/C-1	CG>AT	CG>AT	AGAAACGTAGGAA	GTAGGAA	GCA	GCA	C	A	C>A	C>A_GCA	CG>AT_GTAGGAA	7	TRUE	FALSE
171_v.txt	32432	32432-SNV-G-T	SNV	1	G	T	43	31383	0.137017	52.4884	rnr1D57N	FALSE	CAN	JSY14	1A	rnr1D57N-Rep1A	TGT	G>T	A/T+1	G/C-1	CG>AT	CG>AT	GTCATTGTATGGA	GTATGGA	ACA	ACA	C	A	C>A	C>A_ACA	CG>AT_GTATGGA	7	TRUE	FALSE
171_v.txt	32449	32449-SNV-C-A	SNV	1	C	A	33	31383	0.105152	46.8788	rnr1D57N	FALSE	CAN	JSY14	1A	rnr1D57N-Rep1A	CCA	C>A	A/T+1	G/C-1	CG>AT	CG>AT	AAAGTCCAATGAA	CAATGAA	GGT	CCA	C	T	C>A	C>A_CCA	CG>AT_CAATGAA	7	TRUE	FALSE
171_v.txt	32463	32463-SNV-G-T	SNV	1	G	T	33	31383	0.105152	52.4242	rnr1D57N	FALSE	CAN	JSY14	1A	rnr1D57N-Rep1A	AGA	G>T	A/T+1	G/C-1	CG>AT	CG>AT	AATAGAGAGCCAA	GAGCCAA	TCT	TCT	C	A	C>A	C>A_TCT	CG>AT_GAGCCAA	7	TRUE	FALSE
171_v.txt	32471	32471-SNV-G-T	SNV	1	G	T	92	31383	0.293152	48.9022	rnr1D57N	FALSE	CAN	JSY14	1A	rnr1D57N-Rep1A	TGT	G>T	A/T+1	G/C-1	CG>AT	CG>AT	GCCAATGTAGAAG	GTAGAAG	ACA	ACA	C	A	C>A	C>A_ACA	CG>AT_GTAGAAG	7	TRUE	FALSE
171_v.txt	32494	32494-SNV-C-A	SNV	1	C	A	286	31383	0.911321	45.0559	rnr1D57N	FALSE	CAN	JSY14	1A	rnr1D57N-Rep1A	ACA	C>A	A/T+1	G/C-1	CG>AT	CG>AT	GGAAAACAACTTT	CAACTTT	TGT	ACA	C	T	C>A	C>A_ACA	CG>AT_CAACTTT	7	TRUE	FALSE
171_v.txt	32508	32508-SNV-G-T	SNV	1	G	T	119	31383	0.379186	41.9076	rnr1D57N	FALSE	CAN	JSY14	1A	rnr1D57N-Rep1A	GGC	G>T	A/T+1	G/C-1	CG>AT	CG>AT	TTGATGGCTCTTG	GCTCTTG	CCG	CCG	C	A	C>A	C>A_CCG	CG>AT_GCTCTTG	7	TRUE	FALSE
171_v.txt	32542	32542-SNV-C-A	SNV	1	C	A	34	31383	0.108339	36.2941	rnr1D57N	FALSE	CAN	JSY14	1A	rnr1D57N-Rep1A	TCA	C>A	A/T+1	G/C-1	CG>AT	CG>AT	CAGCTTCACCAGC	CACCAGC	AGT	TCA	C	T	C>A	C>A_TCA	CG>AT_CACCAGC	7	TRUE	FALSE
171_v.txt	32545	32545-SNV-C-A	SNV	1	C	A	52	31383	0.165695	37.0769	rnr1D57N	FALSE	CAN	JSY14	1A	rnr1D57N-Rep1A	CCA	C>A	A/T+1	G/C-1	CG>AT	CG>AT	CTTCACCAGCAGT	CAGCAGT	GGT	CCA	C	T	C>A	C>A_CCA	CG>AT_CAGCAGT	7	TRUE	FALSE
171_v.txt	32566	32566-SNV-C-A	SNV	1	C	A	63	30540	0.206287	37.0476	rnr1D57N	FALSE	CAN	JSY14	1A	rnr1D57N-Rep1A	TCA	C>A	A/T+1	G/C-1	CG>AT	CG>AT	CTAGTTCAGTACC	CAGTACC	AGT	TCA	C	T	C>A	C>A_TCA	CG>AT_CAGTACC	7	TRUE	FALSE
171_v.txt	32575	32575-SNV-G-T	SNV	1	G	T	60	30555	0.196367	35.8326	rnr1D57N	FALSE	CAN	JSY14	1A	rnr1D57N-Rep1A	TGA	G>T	A/T+1	G/C-1	CG>AT	CG>AT	TACCTTGAAATGT	GAAATGT	ACT	ACT	C	A	C>A	C>A_ACT	CG>AT_GAAATGT	7	TRUE	FALSE
171_v.txt	32580	32580-SNV-G-T	SNV	1	G	T	17	30554	0.0556392	35.2907	rnr1D57N	FALSE	CAN	JSY14	1A	rnr1D57N-Rep1A	TGT	G>T	A/T+1	G/C-1	CG>AT	CG>AT	TGAAATGTGAAGG	GTGAAGG	ACA	ACA	C	A	C>A	C>A_ACA	CG>AT_GTGAAGG	7	TRUE	FALSE
171_v.txt	32629	32629-SNV-C-A	SNV	1	C	A	514	30555	1.68221	54.356	rnr1D57N	FALSE	CAN	JSY14	1A	rnr1D57N-Rep1A	TCG	C>A	A/T+1	G/C-1	CG>AT	CG>AT	TCCCTTCGTTTTT	CGTTTTT	AGC	TCG	C	T	C>A	C>A_TCG	CG>AT_CGTTTTT	7	TRUE	FALSE
171_v.txt	32658	32658-SNV-C-A	SNV	1	C	A	6	30555	0.0196367	21.8332	rnr1D57N	FALSE	CAN	JSY14	1A	rnr1D57N-Rep1A	ACC	C>A	A/T+1	G/C-1	CG>AT	CG>AT	CCTGGACCCCAGG	CCCCAGG	TGG	ACC	C	T	C>A	C>A_ACC	CG>AT_CCCCAGG	7	TRUE	FALSE
171_v.txt	32692	32692-SNV-C-A	SNV	1	C	A	75	30555	0.245459	60.0267	rnr1D57N	FALSE	CAN	JSY14	1A	rnr1D57N-Rep1A	CCA	C>A	A/T+1	G/C-1	CG>AT	CG>AT	GGAATCCAACTGG	CAACTGG	GGT	CCA	C	T	C>A	C>A_CCA	CG>AT_CAACTGG	7	TRUE	FALSE
171_v.txt	32733	32733-SNV-C-A	SNV	1	C	A	301	30555	0.985109	60.5383	rnr1D57N	FALSE	CAN	JSY14	1A	rnr1D57N-Rep1A	ACA	C>A	A/T+1	G/C-1	CG>AT	CG>AT	CAAAAACAGTATA	CAGTATA	TGT	ACA	C	T	C>A	C>A_ACA	CG>AT_CAGTATA	7	TRUE	FALSE
171_v.txt	32735	32735-SNV-G-T	SNV	1	G	T	61	30555	0.19964	57.4279	rnr1D57N	FALSE	CAN	JSY14	1A	rnr1D57N-Rep1A	AGT	G>T	A/T+1	G/C-1	CG>AT	CG>AT	AAAACAGTATATT	GTATATT	TCA	TCA	C	A	C>A	C>A_TCA	CG>AT_GTATATT	7	TRUE	FALSE
171_v.txt	32758	32758-SNV-C-A	SNV	1	C	A	7	30555	0.0229095	37.8576	rnr1D57N	FALSE	CAN	JSY14	1A	rnr1D57N-Rep1A	GCT	C>A	A/T+1	G/C-1	CG>AT	CG>AT	TAATGGCTAAAAC	CTAAAAC	CGA	GCT	C	T	C>A	C>A_GCT	CG>AT_CTAAAAC	7	TRUE	FALSE
171_v.txt	32776	32776-SNV-C-A	SNV	1	C	A	6	30554	0.0196374	40.3333	rnr1D57N	FALSE	CAN	JSY14	1A	rnr1D57N-Rep1A	GCG	C>A	A/T+1	G/C-1	CG>AT	CG>AT	TGGAAGCGACCCA	CGACCCA	CGC	GCG	C	T	C>A	C>A_GCG	CG>AT_CGACCCA	7	TRUE	FALSE
171_v.txt	32788	32788-SNV-C-A	SNV	1	C	A	85	30555	0.278187	44.9882	rnr1D57N	FALSE	CAN	JSY14	1A	rnr1D57N-Rep1A	TCG	C>A	A/T+1	G/C-1	CG>AT	CG>AT	AGAACTCGAATTC	CGAATTC	AGC	TCG	C	T	C>A	C>A_TCG	CG>AT_CGAATTC	7	TRUE	FALSE
171_v.txt	32794	32794-SNV-C-A	SNV	1	C	A	82	30555	0.268369	42.0366	rnr1D57N	FALSE	CAN	JSY14	1A	rnr1D57N-Rep1A	TCA	C>A	A/T+1	G/C-1	CG>AT	CG>AT	CGAATTCACCGTA	CACCGTA	AGT	TCA	C	T	C>A	C>A_TCA	CG>AT_CACCGTA	7	TRUE	FALSE
171_v.txt	32797	32797-SNV-C-A	SNV	1	C	A	3	30555	0.00982	37.6653	rnr1D57N	FALSE	CAN	JSY14	1A	rnr1D57N-Rep1A	CCG	C>A	A/T+1	G/C-1	CG>AT	CG>AT	ATTCACCGTAATA	CGTAATA	GGC	CCG	C	T	C>A	C>A_CCG	CG>AT_CGTAATA	7	TRUE	FALSE
171_v.txt	32809	32809-SNV-C-A	SNV	1	C	A	16	30555	0.0523646	37.25	rnr1D57N	FALSE	CAN	JSY14	1A	rnr1D57N-Rep1A	ACA	C>A	A/T+1	G/C-1	CG>AT	CG>AT	ATTTGACAGGGAA	CAGGGAA	TGT	ACA	C	T	C>A	C>A_ACA	CG>AT_CAGGGAA	7	TRUE	FALSE
171_v.txt	32819	32819-SNV-G-T	SNV	1	G	T	30	30555	0.0981836	40.2333	rnr1D57N	FALSE	CAN	JSY14	1A	rnr1D57N-Rep1A	AGT	G>T	A/T+1	G/C-1	CG>AT	CG>AT	GAACAAGTTCATT	GTTCATT	TCA	TCA	C	A	C>A	C>A_TCA	CG>AT_GTTCATT	7	TRUE	FALSE
171_v.txt	32876	32876-SNV-G-T	SNV	1	G	T	139	31336	0.443579	36.9281	rnr1D57N	FALSE	CAN	JSY14	1A	rnr1D57N-Rep1A	TGT	G>T	A/T+1	G/C-1	CG>AT	CG>AT	AACTTTGTACGTC	GTACGTC	ACA	ACA	C	A	C>A	C>A_ACA	CG>AT_GTACGTC	7	TRUE	FALSE
171_v.txt	32901	32901-SNV-C-A	SNV	1	C	A	7	31348	0.02233	34.1331	rnr1D57N	FALSE	CAN	JSY14	1A	rnr1D57N-Rep1A	GCC	C>A	A/T+1	G/C-1	CG>AT	CG>AT	ACTTGGCCAACTA	CCAACTA	CGG	GCC	C	T	C>A	C>A_GCC	CG>AT_CCAACTA	7	TRUE	FALSE
171_v.txt	32902	32902-SNV-C-A	SNV	1	C	A	5	31348	0.01595	42.9972	rnr1D57N	FALSE	CAN	JSY14	1A	rnr1D57N-Rep1A	CCA	C>A	A/T+1	G/C-1	CG>AT	CG>AT	CTTGGCCAACTAC	CAACTAC	GGT	CCA	C	T	C>A	C>A_CCA	CG>AT_CAACTAC	7	TRUE	FALSE
171_v.txt	32908	32908-SNV-C-A	SNV	1	C	A	68	31348	0.21692	46.6471	rnr1D57N	FALSE	CAN	JSY14	1A	rnr1D57N-Rep1A	ACA	C>A	A/T+1	G/C-1	CG>AT	CG>AT	CAACTACACTAAG	CACTAAG	TGT	ACA	C	T	C>A	C>A_ACA	CG>AT_CACTAAG	7	TRUE	FALSE
171_v.txt	32917	32917-SNV-C-A	SNV	1	C	A	158	31348	0.504019	50.8101	rnr1D57N	FALSE	CAN	JSY14	1A	rnr1D57N-Rep1A	TCC	C>A	A/T+1	G/C-1	CG>AT	CG>AT	TAAGTTCCAGGGC	CCAGGGC	AGG	TCC	C	T	C>A	C>A_TCC	CG>AT_CCAGGGC	7	TRUE	FALSE
171_v.txt	32928	32928-SNV-G-T	SNV	1	G	T	54	31348	0.17226	51.2434	rnr1D57N	FALSE	CAN	JSY14	1A	rnr1D57N-Rep1A	AGT	G>T	A/T+1	G/C-1	CG>AT	CG>AT	GCAAAAGTGATTG	GTGATTG	TCA	TCA	C	A	C>A	C>A_TCA	CG>AT_GTGATTG	7	TRUE	FALSE
171_v.txt	32934	32934-SNV-G-T	SNV	1	G	T	621	31348	1.98099	50.4891	rnr1D57N	FALSE	CAN	JSY14	1A	rnr1D57N-Rep1A	TGC	G>T	A/T+1	G/C-1	CG>AT	CG>AT	GTGATTGCCCAAG	GCCCAAG	ACG	ACG	C	A	C>A	C>A_ACG	CG>AT_GCCCAAG	7	TRUE	FALSE
171_v.txt	32937	32937-SNV-C-A	SNV	1	C	A	24	31348	0.0765599	47.0299	rnr1D57N	FALSE	CAN	JSY14	1A	rnr1D57N-Rep1A	CCA	C>A	A/T+1	G/C-1	CG>AT	CG>AT	ATTGCCCAAGAAA	CAAGAAA	GGT	CCA	C	T	C>A	C>A_CCA	CG>AT_CAAGAAA	7	TRUE	FALSE
171_v.txt	32940	32940-SNV-G-T	SNV	1	G	T	33	31348	0.10527	41	rnr1D57N	FALSE	CAN	JSY14	1A	rnr1D57N-Rep1A	AGA	G>T	A/T+1	G/C-1	CG>AT	CG>AT	GCCCAAGAAAACC	GAAAACC	TCT	TCT	C	A	C>A	C>A_TCT	CG>AT_GAAAACC	7	TRUE	FALSE
171_v.txt	32970	32970-SNV-C-A	SNV	1	C	A	33	31348	0.10527	60.6061	rnr1D57N	FALSE	CAN	JSY14	1A	rnr1D57N-Rep1A	ACC	C>A	A/T+1	G/C-1	CG>AT	CG>AT	GCCGCACCAAATG	CCAAATG	TGG	ACC	C	T	C>A	C>A_ACC	CG>AT_CCAAATG	7	TRUE	FALSE
171_v.txt	33012	33012-SNV-G-T	SNV	1	G	T	20	31348	0.0637999	58.75	rnr1D57N	FALSE	CAN	JSY14	1A	rnr1D57N-Rep1A	AGA	G>T	A/T+1	G/C-1	CG>AT	CG>AT	GTGAAAGAGGATG	GAGGATG	TCT	TCT	C	A	C>A	C>A_TCT	CG>AT_GAGGATG	7	TRUE	FALSE
171_v.txt	33033	33033-SNV-G-T	SNV	1	G	T	64	31348	0.20416	56.8125	rnr1D57N	FALSE	CAN	JSY14	1A	rnr1D57N-Rep1A	TGT	G>T	A/T+1	G/C-1	CG>AT	CG>AT	ATGAATGTAGCCA	GTAGCCA	ACA	ACA	C	A	C>A	C>A_ACA	CG>AT_GTAGCCA	7	TRUE	FALSE
171_v.txt	33043	33043-SNV-C-A	SNV	1	C	A	37	31348	0.11803	60.2973	rnr1D57N	FALSE	CAN	JSY14	1A	rnr1D57N-Rep1A	TCA	C>A	A/T+1	G/C-1	CG>AT	CG>AT	CCATTTCACCCAA	CACCCAA	AGT	TCA	C	T	C>A	C>A_TCA	CG>AT_CACCCAA	7	TRUE	FALSE
171_v.txt	33051	33051-SNV-G-T	SNV	1	G	T	63	31348	0.20097	59.746	rnr1D57N	FALSE	CAN	JSY14	1A	rnr1D57N-Rep1A	GGA	G>T	A/T+1	G/C-1	CG>AT	CG>AT	CCCAAGGACTGCG	GACTGCG	CCT	CCT	C	A	C>A	C>A_CCT	CG>AT_GACTGCG	7	TRUE	FALSE
171_v.txt	33114	33114-SNV-C-A	SNV	1	C	A	5	31348	0.01595	41.2	rnr1D57N	FALSE	CAN	JSY14	1A	rnr1D57N-Rep1A	GCC	C>A	A/T+1	G/C-1	CG>AT	CG>AT	ACTGGGCCGGCGT	CCGGCGT	CGG	GCC	C	T	C>A	C>A_GCC	CG>AT_CCGGCGT	7	TRUE	FALSE
171_v.txt	33115	33115-SNV-C-A	SNV	1	C	A	150	31348	0.478499	45.1467	rnr1D57N	FALSE	CAN	JSY14	1A	rnr1D57N-Rep1A	CCG	C>A	A/T+1	G/C-1	CG>AT	CG>AT	CTGGGCCGGCGTT	CGGCGTT	GGC	CCG	C	T	C>A	C>A_CCG	CG>AT_CGGCGTT	7	TRUE	FALSE
171_v.txt	33118	33118-SNV-C-A	SNV	1	C	A	24	31348	0.0765599	44.5833	rnr1D57N	FALSE	CAN	JSY14	1A	rnr1D57N-Rep1A	GCG	C>A	A/T+1	G/C-1	CG>AT	CG>AT	GGCCGGCGTTGGT	CGTTGGT	CGC	GCG	C	T	C>A	C>A_GCG	CG>AT_CGTTGGT	7	TRUE	FALSE
171_v.txt	33151	33151-SNV-G-T	SNV	1	G	T	29	31348	0.0925099	36.069	rnr1D57N	FALSE	CAN	JSY14	1A	rnr1D57N-Rep1A	AGA	G>T	A/T+1	G/C-1	CG>AT	CG>AT	TGAAAAGACCTGT	GACCTGT	TCT	TCT	C	A	C>A	C>A_TCT	CG>AT_GACCTGT	7	TRUE	FALSE
171_v.txt	33153	33153-SNV-C-A	SNV	1	C	A	21	31348	0.0669899	37.4287	rnr1D57N	FALSE	CAN	JSY14	1A	rnr1D57N-Rep1A	ACC	C>A	A/T+1	G/C-1	CG>AT	CG>AT	AAAAGACCTGTAC	CCTGTAC	TGG	ACC	C	T	C>A	C>A_ACC	CG>AT_CCTGTAC	7	TRUE	FALSE
171_v.txt	33154	33154-SNV-C-A	SNV	1	C	A	36	31348	0.11484	36.0552	rnr1D57N	FALSE	CAN	JSY14	1A	rnr1D57N-Rep1A	CCT	C>A	A/T+1	G/C-1	CG>AT	CG>AT	AAAGACCTGTACC	CTGTACC	GGA	CCT	C	T	C>A	C>A_CCT	CG>AT_CTGTACC	7	TRUE	FALSE
171_v.txt	33159	33159-SNV-C-A	SNV	1	C	A	14	31342	0.0446685	35.9973	rnr1D57N	FALSE	CAN	JSY14	1A	rnr1D57N-Rep1A	ACC	C>A	A/T+1	G/C-1	CG>AT	CG>AT	CCTGTACCAATAG	CCAATAG	TGG	ACC	C	T	C>A	C>A_ACC	CG>AT_CCAATAG	7	TRUE	FALSE
171_v.txt	33160	33160-SNV-C-A	SNV	1	C	A	29	31342	0.0925276	36.8616	rnr1D57N	FALSE	CAN	JSY14	1A	rnr1D57N-Rep1A	CCA	C>A	A/T+1	G/C-1	CG>AT	CG>AT	CTGTACCAATAGT	CAATAGT	GGT	CCA	C	T	C>A	C>A_CCA	CG>AT_CAATAGT	7	TRUE	FALSE
171_v.txt	33168	33168-SNV-C-A	SNV	1	C	A	56	31300	0.178914	36.5319	rnr1D57N	FALSE	CAN	JSY14	1A	rnr1D57N-Rep1A	ACC	C>A	A/T+1	G/C-1	CG>AT	CG>AT	ATAGTACCACCAA	CCACCAA	TGG	ACC	C	T	C>A	C>A_ACC	CG>AT_CCACCAA	7	TRUE	FALSE
171_v.txt	33169	33169-SNV-C-A	SNV	1	C	A	231	31300	0.738019	37.5319	rnr1D57N	FALSE	CAN	JSY14	1A	rnr1D57N-Rep1A	CCA	C>A	A/T+1	G/C-1	CG>AT	CG>AT	TAGTACCACCAAG	CACCAAG	GGT	CCA	C	T	C>A	C>A_CCA	CG>AT_CACCAAG	7	TRUE	FALSE
171_v.txt	33177	33177-SNV-G-T	SNV	1	G	T	21	31297	0.0670991	37.5239	rnr1D57N	FALSE	CAN	JSY14	1A	rnr1D57N-Rep1A	GGC	G>T	A/T+1	G/C-1	CG>AT	CG>AT	CCAAGGGCAATCA	GCAATCA	CCG	CCG	C	A	C>A	C>A_CCG	CG>AT_GCAATCA	7	TRUE	FALSE
171_v.txt	33205	33205-SNV-G-T	SNV	1	G	T	8	13895	0.0575747	39.625	rnr1D57N	FALSE	CAN	JSY14	1A	rnr1D57N-Rep1A	AGC	G>T	A/T+1	G/C-1	CG>AT	CG>AT	GCTTAAGCTCTCT	GCTCTCT	TCG	TCG	C	A	C>A	C>A_TCG	CG>AT_GCTCTCT	7	TRUE	FALSE
171_v.txt	33220	33220-SNV-C-A	SNV	1	C	A	29	13904	0.208573	39.2759	rnr1D57N	FALSE	CAN	JSY14	1A	rnr1D57N-Rep1A	TCA	C>A	A/T+1	G/C-1	CG>AT	CG>AT	TCACTTCAGCGTT	CAGCGTT	AGT	TCA	C	T	C>A	C>A_TCA	CG>AT_CAGCGTT	7	TRUE	FALSE
171_v.txt	33241	33241-SNV-C-A	SNV	1	C	A	12	13904	0.0863061	41.1667	rnr1D57N	FALSE	CAN	JSY14	1A	rnr1D57N-Rep1A	TCA	C>A	A/T+1	G/C-1	CG>AT	CG>AT	CTCCTTCATCTTC	CATCTTC	AGT	TCA	C	T	C>A	C>A_TCA	CG>AT_CATCTTC	7	TRUE	FALSE
171_v.txt	33247	33247-SNV-C-A	SNV	1	C	A	16	13904	0.115075	43.125	rnr1D57N	FALSE	CAN	JSY14	1A	rnr1D57N-Rep1A	TCA	C>A	A/T+1	G/C-1	CG>AT	CG>AT	CATCTTCATCACC	CATCACC	AGT	TCA	C	T	C>A	C>A_TCA	CG>AT_CATCACC	7	TRUE	FALSE
171_v.txt	33325	33325-SNV-C-A	SNV	1	C	A	245	13904	1.76208	58.351	rnr1D57N	FALSE	CAN	JSY14	1A	rnr1D57N-Rep1A	TCT	C>A	A/T+1	G/C-1	CG>AT	CG>AT	ACAATTCTTTACT	CTTTACT	AGA	TCT	C	T	C>A	C>A_TCT	CG>AT_CTTTACT	7	TRUE	FALSE
171_v.txt	33354	33354-SNV-G-T	SNV	1	G	T	110	13896	0.791595	31.649	rnr1D57N	FALSE	CAN	JSY14	1A	rnr1D57N-Rep1A	TGA	G>T	A/T+1	G/C-1	CG>AT	CG>AT	GGTATTGACCCAC	GACCCAC	ACT	ACT	C	A	C>A	C>A_ACT	CG>AT_GACCCAC	7	TRUE	FALSE
171_v.txt	33385	33385-SNV-C-A	SNV	1	C	A	17	13904	0.122267	53.8824	rnr1D57N	FALSE	CAN	JSY14	1A	rnr1D57N-Rep1A	TCA	C>A	A/T+1	G/C-1	CG>AT	CG>AT	AAGCTTCAACGTC	CAACGTC	AGT	TCA	C	T	C>A	C>A_TCA	CG>AT_CAACGTC	7	TRUE	FALSE
171_v.txt	33415	33415-SNV-C-A	SNV	1	C	A	23	13904	0.16542	34.8696	rnr1D57N	FALSE	CAN	JSY14	1A	rnr1D57N-Rep1A	TCA	C>A	A/T+1	G/C-1	CG>AT	CG>AT	CCGGCTCATTGTA	CATTGTA	AGT	TCA	C	T	C>A	C>A_TCA	CG>AT_CATTGTA	7	TRUE	FALSE
171_v.txt	33436	33436-SNV-C-A	SNV	1	C	A	28	13904	0.201381	44	rnr1D57N	FALSE	CAN	JSY14	1A	rnr1D57N-Rep1A	TCT	C>A	A/T+1	G/C-1	CG>AT	CG>AT	TCTCCTCTATGTC	CTATGTC	AGA	TCT	C	T	C>A	C>A_TCT	CG>AT_CTATGTC	7	TRUE	FALSE
171_v.txt	33474	33474-SNV-C-A	SNV	1	C	A	32	13903	0.230166	33.625	rnr1D57N	FALSE	CAN	JSY14	1A	rnr1D57N-Rep1A	GCC	C>A	A/T+1	G/C-1	CG>AT	CG>AT	GCTATGCCTTTTT	CCTTTTT	CGG	GCC	C	T	C>A	C>A_GCC	CG>AT_CCTTTTT	7	TRUE	FALSE
171_v.txt	32164	32164-Replacement-CG-A	Replacement	2	CG	A	11	24202	0.0454508	46.6364	rnr1D57N	FALSE	CAN	JSY14	1A	rnr1D57N-Rep1A	GCG	nope	A/T+1	>1bpdel	none	Replac.	CCAAAGCGCCAAA	CGCCAAA	CGC	GCG	CG	T	NA	NA_GCG	Replac._CGCCAAA	7	TRUE	FALSE
171_v.txt	32814	32814-Replacement-AAC-G	Replacement	3	AAC	G	26	30555	0.0850925	44.9359	rnr1D57N	FALSE	CAN	JSY14	1A	rnr1D57N-Rep1A	GAA	nope	G/C+1	>1bpdel	none	Replac.	ACAGGGAACAAGT	AACAAGT	CTT	GAA	AAC	C	NA	NA_GAA	Replac._AACAAGT	7	TRUE	FALSE
171_v.txt	32841	32841-Replacement-C-TA	Replacement	2	C	TA	1	30555	0.00327	38	rnr1D57N	FALSE	CAN	JSY14	1A	rnr1D57N-Rep1A	CCA	nope	>1bp-ins	G/C-1	none	Replac.	ATTACCCAAAAAA	CAAAAAA	GGT	CCA	C	none	nope	nope_CCA	Replac._CAAAAAA	7	TRUE	FALSE
171_v.txt	32937	32937-Replacement-C-TG	Replacement	2	C	TG	1	31348	0.00319	22.5	rnr1D57N	FALSE	CAN	JSY14	1A	rnr1D57N-Rep1A	CCA	nope	>1bp-ins	G/C-1	none	Replac.	ATTGCCCAAGAAA	CAAGAAA	GGT	CCA	C	none	nope	nope_CCA	Replac._CAAGAAA	7	TRUE	FALSE
171_v.txt	31875	31875-MNV-TA-GG	MNV	2	TA	GG	5	10179	0.0491207	42.3	rnr1D57N	FALSE	CAN	JSY14	1A	rnr1D57N-Rep1A	ATA	nope	>1bp-ins	>1bpdel	none	MNV	GAGATATAGGCGG	TAGGCGG	TAT	ATA	TA	none	NA	NA_ATA	MNV_TAGGCGG	7	TRUE	FALSE
171_v.txt	31956	31956-MNV-GT-TA	MNV	2	GT	TA	18	24202	0.074374	36.8889	rnr1D57N	FALSE	CAN	JSY14	1A	rnr1D57N-Rep1A	TGT	nope	>1bp-ins	>1bpdel	none	MNV	ATAAATGTGGCCG	GTGGCCG	ACA	TGT	GT	none	NA	NA_TGT	MNV_GTGGCCG	7	TRUE	FALSE
171_v.txt	32292	32292-MNV-GAA-ATT	MNV	3	GAA	ATT	5	31383	0.0159322	56.6667	rnr1D57N	FALSE	CAN	JSY14	1A	rnr1D57N-Rep1A	TGA	nope	>1bp-ins	>1bpdel	none	MNV	ATATTTGAATTTG	GAATTTG	ACT	TGA	GAA	none	NA	NA_TGA	MNV_GAATTTG	7	TRUE	FALSE
171_v.txt	32535	32535-MNV-GC-AT	MNV	2	GC	AT	1	31383	0.00319	38	rnr1D57N	FALSE	CAN	JSY14	1A	rnr1D57N-Rep1A	TGC	nope	>1bp-ins	>1bpdel	none	MNV	GGGTTTGCAGCTT	GCAGCTT	ACG	TGC	GC	none	NA	NA_TGC	MNV_GCAGCTT	7	TRUE	FALSE
171_v.txt	32544	32544-MNV-CC-AA	MNV	2	CC	AA	4	31383	0.0127458	31.625	rnr1D57N	FALSE	CAN	JSY14	1A	rnr1D57N-Rep1A	ACC	nope	>1bp-ins	>1bpdel	none	MNV	GCTTCACCAGCAG	CCAGCAG	TGG	ACC	CC	none	NA	NA_ACC	MNV_CCAGCAG	7	TRUE	FALSE
171_v.txt	32787	32787-MNV-TC-CT	MNV	2	TC	CT	36	30555	0.11782	45.9583	rnr1D57N	FALSE	CAN	JSY14	1A	rnr1D57N-Rep1A	CTC	nope	>1bp-ins	>1bpdel	none	MNV	CAGAACTCGAATT	TCGAATT	GAG	CTC	TC	none	NA	NA_CTC	MNV_TCGAATT	7	TRUE	FALSE
171_v.txt	32797	32797-MNV-CG-TT	MNV	2	CG	TT	57	30555	0.186549	43.9468	rnr1D57N	FALSE	CAN	JSY14	1A	rnr1D57N-Rep1A	CCG	nope	>1bp-ins	>1bpdel	none	MNV	ATTCACCGTAATA	CGTAATA	GGC	CCG	CG	none	NA	NA_CCG	MNV_CGTAATA	7	TRUE	FALSE
171_v.txt	32900	32900-MNV-GC-AA	MNV	2	GC	AA	1	31348	0.00319	35.5	rnr1D57N	FALSE	CAN	JSY14	1A	rnr1D57N-Rep1A	GGC	nope	>1bp-ins	>1bpdel	none	MNV	GACTTGGCCAACT	GCCAACT	CCG	GGC	GC	none	NA	NA_GGC	MNV_GCCAACT	7	TRUE	FALSE
171_v.txt	32914	32914-MNV-GT-AC	MNV	2	GT	AC	66	31348	0.21054	46.2429	rnr1D57N	FALSE	CAN	JSY14	1A	rnr1D57N-Rep1A	AGT	nope	>1bp-ins	>1bpdel	none	MNV	CACTAAGTTCCAG	GTTCCAG	TCA	AGT	GT	none	NA	NA_AGT	MNV_GTTCCAG	7	TRUE	FALSE
171_v.txt	32979	32979-MNV-GGA-TAC	MNV	3	GGA	TAC	16	31348	0.0510399	61.4167	rnr1D57N	FALSE	CAN	JSY14	1A	rnr1D57N-Rep1A	TGG	nope	>1bp-ins	>1bpdel	none	MNV	AATGCTGGAGAAA	GGAGAAA	ACC	TGG	GGA	none	NA	NA_TGG	MNV_GGAGAAA	7	TRUE	FALSE
171_v.txt	33153	33153-MNV-CC-AA	MNV	2	CC	AA	2	31348	0.00638	35.25	rnr1D57N	FALSE	CAN	JSY14	1A	rnr1D57N-Rep1A	ACC	nope	>1bp-ins	>1bpdel	none	MNV	AAAAGACCTGTAC	CCTGTAC	TGG	ACC	CC	none	NA	NA_ACC	MNV_CCTGTAC	7	TRUE	FALSE
171_v.txt	33159	33159-MNV-CC-AA	MNV	2	CC	AA	1	31342	0.00319	31.5	rnr1D57N	FALSE	CAN	JSY14	1A	rnr1D57N-Rep1A	ACC	nope	>1bp-ins	>1bpdel	none	MNV	CCTGTACCAATAG	CCAATAG	TGG	ACC	CC	none	NA	NA_ACC	MNV_CCAATAG	7	TRUE	FALSE
171_v.txt	33168	33168-MNV-CC-AT	MNV	2	CC	AT	8	31300	0.0255591	37.9999	rnr1D57N	FALSE	CAN	JSY14	1A	rnr1D57N-Rep1A	ACC	nope	>1bp-ins	>1bpdel	none	MNV	ATAGTACCACCAA	CCACCAA	TGG	ACC	CC	none	NA	NA_ACC	MNV_CCACCAA	7	TRUE	FALSE
171_v.txt	31883	31883-Insertion---AGCAA	Insertion	5	-	AGCAA	25	10179	0.245604	43.4	rnr1D57N	FALSE	CAN	JSY14	1A	rnr1D57N-Rep1A	CAG	nope	>1bp-ins	>1bpdel	none	>1bp-ins	GGCGGCAGCAAAG	AGCAAAG	GTC	CAG	-	none	NA	NA_CAG	>1bp-ins_AGCAAAG	7	TRUE	FALSE
171_v.txt	31902	31902-Insertion---C	Insertion	1	-	C	10	10171	0.0983187	42	rnr1D57N	FALSE	CAN	JSY14	1A	rnr1D57N-Rep1A	GAA	nope	G/C+1	>1bpdel	none	G/C+1	CCATTGAATTTTG	AATTTTG	CTT	GAA	-	G	NA	NA_GAA	G/C+1_AATTTTG	7	TRUE	FALSE
171_v.txt	31913	31913-Insertion---A	Insertion	1	-	A	2	10171	0.0196638	38	rnr1D57N	FALSE	CAN	JSY14	1A	rnr1D57N-Rep1A	CAA	nope	A/T+1	>1bpdel	none	A/T+1	TGGTGCAAAAGCC	AAAAGCC	GTT	CAA	-	T	NA	NA_CAA	A/T+1_AAAAGCC	7	TRUE	FALSE
171_v.txt	31969	31969-Insertion---A	Insertion	1	-	A	4	24202	0.0165276	38	rnr1D57N	FALSE	CAN	JSY14	1A	rnr1D57N-Rep1A	TAA	nope	A/T+1	>1bpdel	none	A/T+1	CATAATAAGCCAA	AAGCCAA	ATT	TAA	-	T	NA	NA_TAA	A/T+1_AAGCCAA	7	TRUE	FALSE
171_v.txt	32067	32067-Insertion---AA	Insertion	2	-	AA	11	24202	0.0454508	64	rnr1D57N	FALSE	CAN	JSY14	1A	rnr1D57N-Rep1A	GAT	nope	>1bp-ins	>1bpdel	none	>1bp-ins	ATTGAGATAAATA	ATAAATA	CTA	GAT	-	none	NA	NA_GAT	>1bp-ins_ATAAATA	7	TRUE	FALSE
171_v.txt	32081	32081-Insertion---A	Insertion	1	-	A	356	24202	1.47095	63.5253	rnr1D57N	FALSE	CAN	JSY14	1A	rnr1D57N-Rep1A	CAA	nope	A/T+1	>1bpdel	none	A/T+1	CCATGCAAAAAAG	AAAAAAG	GTT	CAA	-	T	NA	NA_CAA	A/T+1_AAAAAAG	7	TRUE	FALSE
171_v.txt	32081	32081-Insertion---AA	Insertion	2	-	AA	13	24202	0.0537146	64	rnr1D57N	FALSE	CAN	JSY14	1A	rnr1D57N-Rep1A	CAA	nope	>1bp-ins	>1bpdel	none	>1bp-ins	CCATGCAAAAAAG	AAAAAAG	GTT	CAA	-	none	NA	NA_CAA	>1bp-ins_AAAAAAG	7	TRUE	FALSE
171_v.txt	32166	32166-Insertion---C	Insertion	1	-	C	2	24202	0.00826	51	rnr1D57N	FALSE	CAN	JSY14	1A	rnr1D57N-Rep1A	GCC	nope	G/C+1	>1bpdel	none	G/C+1	AAAGCGCCAAATG	CCAAATG	CGG	GCC	-	G	NA	NA_GCC	G/C+1_CCAAATG	7	TRUE	FALSE
171_v.txt	32228	32228-Insertion---A	Insertion	1	-	A	3	24201	0.0123962	38	rnr1D57N	FALSE	CAN	JSY14	1A	rnr1D57N-Rep1A	GGA	nope	A/T+1	>1bpdel	none	A/T+1	TGACAGGAATTTA	GAATTTA	CCT	GGA	-	T	NA	NA_GGA	A/T+1_GAATTTA	7	TRUE	FALSE
171_v.txt	32289	32289-Insertion---T	Insertion	1	-	T	23	31383	0.0732881	47.9565	rnr1D57N	FALSE	CAN	JSY14	1A	rnr1D57N-Rep1A	ATT	nope	A/T+1	>1bpdel	none	A/T+1	TAAATATTTGAAT	TTTGAAT	TAA	ATT	-	A	NA	NA_ATT	A/T+1_TTTGAAT	7	TRUE	FALSE
171_v.txt	32322	32322-Insertion---A	Insertion	1	-	A	21	31383	0.0669152	62.0952	rnr1D57N	FALSE	CAN	JSY14	1A	rnr1D57N-Rep1A	GAT	nope	A/T+1	>1bpdel	none	A/T+1	GTTAAGATAACAG	ATAACAG	CTA	GAT	-	T	NA	NA_GAT	A/T+1_ATAACAG	7	TRUE	FALSE
171_v.txt	32352	32352-Insertion---T	Insertion	1	-	T	9	31383	0.0286779	63	rnr1D57N	FALSE	CAN	JSY14	1A	rnr1D57N-Rep1A	CTT	nope	A/T+1	>1bpdel	none	A/T+1	AAAACCTTTGTAC	TTTGTAC	GAA	CTT	-	A	NA	NA_CTT	A/T+1_TTTGTAC	7	TRUE	FALSE
171_v.txt	32369	32369-Insertion---A	Insertion	1	-	A	4	31383	0.0127458	64	rnr1D57N	FALSE	CAN	JSY14	1A	rnr1D57N-Rep1A	CAA	nope	A/T+1	>1bpdel	none	A/T+1	GTTCTCAATAGCA	AATAGCA	GTT	CAA	-	T	NA	NA_CAA	A/T+1_AATAGCA	7	TRUE	FALSE
171_v.txt	32442	32442-Insertion---A	Insertion	1	-	A	1	31383	0.00319	64	rnr1D57N	FALSE	CAN	JSY14	1A	rnr1D57N-Rep1A	TAA	nope	A/T+1	>1bpdel	none	A/T+1	GGAACTAAAAGTC	AAAAGTC	ATT	TAA	-	T	NA	NA_TAA	A/T+1_AAAAGTC	7	TRUE	FALSE
171_v.txt	32473	32473-Insertion---AGA	Insertion	3	-	AGA	38	31383	0.121085	52.1228	rnr1D57N	FALSE	CAN	JSY14	1A	rnr1D57N-Rep1A	TAG	nope	>1bp-ins	>1bpdel	none	>1bp-ins	CAATGTAGAAGGT	AGAAGGT	ATC	TAG	-	none	NA	NA_TAG	>1bp-ins_AGAAGGT	7	TRUE	FALSE
171_v.txt	32490	32490-Insertion---A	Insertion	1	-	A	283	31383	0.901762	45.3958	rnr1D57N	FALSE	CAN	JSY14	1A	rnr1D57N-Rep1A	GAA	nope	A/T+1	>1bpdel	none	A/T+1	ATACGGAAAACAA	AAAACAA	CTT	GAA	-	T	NA	NA_GAA	A/T+1_AAAACAA	7	TRUE	FALSE
171_v.txt	32498	32498-Insertion---T	Insertion	1	-	T	31	31383	0.0987796	42.0968	rnr1D57N	FALSE	CAN	JSY14	1A	rnr1D57N-Rep1A	CTT	nope	A/T+1	>1bpdel	none	A/T+1	AACAACTTTTTTG	TTTTTTG	GAA	CTT	-	A	NA	NA_CTT	A/T+1_TTTTTTG	7	TRUE	FALSE
171_v.txt	32528	32528-Insertion---G	Insertion	1	-	G	17	31383	0.0541695	40.6471	rnr1D57N	FALSE	CAN	JSY14	1A	rnr1D57N-Rep1A	TGG	nope	G/C+1	>1bpdel	none	G/C+1	TTTTCTGGGGTTT	GGGGTTT	ACC	TGG	-	C	NA	NA_TGG	G/C+1_GGGGTTT	7	TRUE	FALSE
171_v.txt	32598	32598-Insertion---AA	Insertion	2	-	AA	8	30554	0.0261832	43.5625	rnr1D57N	FALSE	CAN	JSY14	1A	rnr1D57N-Rep1A	CAA	nope	>1bp-ins	>1bpdel	none	>1bp-ins	TTAATCAAAGAGG	AAAGAGG	GTT	CAA	-	none	NA	NA_CAA	>1bp-ins_AAAGAGG	7	TRUE	FALSE
171_v.txt	32631	32631-Insertion---T	Insertion	1	-	T	176	30555	0.57601	51.0909	rnr1D57N	FALSE	CAN	JSY14	1A	rnr1D57N-Rep1A	GTT	nope	A/T+1	>1bpdel	none	A/T+1	CCTTCGTTTTTAT	TTTTTAT	CAA	GTT	-	A	NA	NA_GTT	A/T+1_TTTTTAT	7	TRUE	FALSE
171_v.txt	32665	32665-Insertion---CACCTGGGTTTCTCCAATAACGGAATC	Insertion	27	-	CACCTGGGTTTCTCCAATAACGGAATC	5	30555	0.0163639	55.2222	rnr1D57N	FALSE	CAN	JSY14	1A	rnr1D57N-Rep1A	GCA	nope	>1bp-ins	>1bpdel	none	>1bp-ins	CCCAGGCACCTGG	CACCTGG	CGT	GCA	-	none	NA	NA_GCA	>1bp-ins_CACCTGG	7	TRUE	FALSE
171_v.txt	32678	32678-Insertion---CCAATAACGGAATCCAACTGGGCCGGTAACCCCAGCA	Insertion	37	-	CCAATAACGGAATCCAACTGGGCCGGTAACCCCAGCA	25	30555	0.0818197	55.1005	rnr1D57N	FALSE	CAN	JSY14	1A	rnr1D57N-Rep1A	TCC	nope	>1bp-ins	>1bpdel	none	>1bp-ins	GTTTCTCCAATAA	CCAATAA	AGG	TCC	-	none	NA	NA_TCC	>1bp-ins_CCAATAA	7	TRUE	FALSE
171_v.txt	32728	32728-Insertion---A	Insertion	1	-	A	349	30555	1.1422	62.0487	rnr1D57N	FALSE	CAN	JSY14	1A	rnr1D57N-Rep1A	CAA	nope	A/T+1	>1bpdel	none	A/T+1	CCATACAAAAACA	AAAAACA	GTT	CAA	-	T	NA	NA_CAA	A/T+1_AAAAACA	7	TRUE	FALSE
171_v.txt	32728	32728-Insertion---AA	Insertion	2	-	AA	2	30555	0.00655	64	rnr1D57N	FALSE	CAN	JSY14	1A	rnr1D57N-Rep1A	CAA	nope	>1bp-ins	>1bpdel	none	>1bp-ins	CCATACAAAAACA	AAAAACA	GTT	CAA	-	none	NA	NA_CAA	>1bp-ins_AAAAACA	7	TRUE	FALSE
171_v.txt	32760	32760-Insertion---A	Insertion	1	-	A	1	30555	0.00327	38	rnr1D57N	FALSE	CAN	JSY14	1A	rnr1D57N-Rep1A	TAA	nope	A/T+1	>1bpdel	none	A/T+1	ATGGCTAAAACTT	AAAACTT	ATT	TAA	-	T	NA	NA_TAA	A/T+1_AAAACTT	7	TRUE	FALSE
171_v.txt	32760	32760-Insertion---AAAACTTTGATGGAAGCGACCC	Insertion	22	-	AAAACTTTGATGGAAGCGACCC	15	30555	0.0490918	53.4303	rnr1D57N	FALSE	CAN	JSY14	1A	rnr1D57N-Rep1A	TAA	nope	>1bp-ins	>1bpdel	none	>1bp-ins	ATGGCTAAAACTT	AAAACTT	ATT	TAA	-	none	NA	NA_TAA	>1bp-ins_AAAACTT	7	TRUE	FALSE
171_v.txt	32802	32802-Insertion---T	Insertion	1	-	T	11	30555	0.0360007	41.5455	rnr1D57N	FALSE	CAN	JSY14	1A	rnr1D57N-Rep1A	ATA	nope	A/T+1	>1bpdel	none	A/T+1	CCGTAATATTTGA	TATTTGA	TAT	ATA	-	A	NA	NA_ATA	A/T+1_TATTTGA	7	TRUE	FALSE
[truncated: 11,032 more rows]

## Sheet: Table S6
Supplementary Table 6: Mutation rates
Strain	RNR1	rnr1D57N	rnr1Y285F	rnr1Y285F pGAL	rnr1Y285A	rnr1Y285A pGAL
Mutation rate (x 10-7)	2.7 (1)a	7.3 (2.7)	7.5 (2.8)	7.8 (2.9)	55 (20.4)	25 (9.3)
[truncated: 6 more rows]

## Sheet: Table S7.
Suplementary Table 7. Mutation spectra
[truncated: 38 more rows]

[truncated: 1 more sheets: Table S8.]
